# Supplementary material
Source: MDPI journal article supplement (https://www.mdpi.com/2073-4352/8/2/57)
Supplement: s1 [file s1]

data_global
_audit_creation_date                               2017-12-01
_audit_creation_method                            'by CrystalStructure 4.2'
_audit_update_record                               ?

#==============================================================================
# PROCESSING SUMMARY (IUCr Office Use Only)

_journal_date_recd_electronic                      ?
_journal_date_from_coeditor                        ?
_journal_date_accepted                             ?
_journal_coeditor_code                             ?

#==============================================================================
# SUBMISSION DETAILS

_publ_contact_author_name                         'Takeru Ito'
_publ_contact_author_email                        'takeito@keyaki.cc.u-tokai.ac.jp'
_publ_contact_author_fax                          '81-463-58-9543'
_publ_contact_author_phone                        '81-463-58-1211 ex.3737'
_publ_contact_letter
;
    ENTER TEXT OF LETTER
;
_publ_requested_journal                           'ENTER JOURNAL NAME HERE'
_publ_requested_category
                                               'CHOOSE FI FM FO CI CM CO or AD'
_publ_requested_coeditor_name                      ?

#==============================================================================
# TITLE AND AUTHOR LIST

_publ_section_title
;
    ENTER SECTION TITLE
;
_publ_section_title_footnote
;
    ENTER FOOTNOTE TO TITLE OF PAPER
;
loop_
_publ_author_name
_publ_author_footnote
_publ_author_address
' FIRST AUTHORS NAME '
;
  FIRST AUTHORS FOOTNOTES
;
;
  FIRST AUTHORS ADDRESS
;
_publ_section_synopsis
;
    ENTER SYNOPSIS
;

#==============================================================================
# TEXT

_publ_section_abstract
;
    ENTER ABSTRACT
;
_publ_section_comment
;
    ENTER TEXT
;
_publ_section_references
;
    ENTER OTHER REFERENCES

    Rigaku (2017). CrystalStructure. Version 4.2. 
    Rigaku Corporation, Tokyo, Japan.

    Sheldrick, G. M. (2014). Acta Cryst. (2014). A70, C1437.
    SHELXT Version 2014/5

    Sheldrick, G.M. (2008) SHELXL Version 2014/7, Acta Cryst. A64, 112-122.

;
_publ_section_figure_captions
;
    ENTER FIGURE CAPTIONS
;
_publ_section_exptl_prep
;
    ENTER COMPOUND PREPARATION DETAILS
;
_publ_section_exptl_refinement
;
    ENTER SPECIAL DETAILS OF THE REFINEMENT
;

#==============================================================================
data_CellFormulaUnitsZ

#==============================================================================
# CHEMICAL DATA

_chemical_formula_sum                             'C66 H124 N8 O30 V10'
_chemical_formula_moiety                          'C66 H124 N8 O30 V10'
_chemical_formula_weight                           2019.16
_chemical_melting_point                            ?

#==============================================================================
# CRYSTAL DATA
_space_group_crystal_system                        monoclinic
_space_group_name_H-M_alt                         'P 1 21/c 1'
_space_group_name_Hall                            '-P 2ybc'
_space_group_IT_number                             14
loop_
_space_group_symop_id
_space_group_symop_operation_xyz
1   '+X,+Y,+Z'
2   '-X,1/2+Y,1/2-Z'
3   '-X,-Y,-Z'
4   '+X,-1/2-Y,-1/2+Z'
#------------------------------------------------------------------------------
_cell_length_a                                     26.183(2)
_cell_length_b                                     15.828(2)
_cell_length_c                                     21.891(2)
_cell_angle_alpha                                  90.0000
_cell_angle_beta                                   103.094(2)
_cell_angle_gamma                                  90.0000
_cell_volume                                       8836.3(15)
_cell_formula_units_Z                              4
_cell_measurement_reflns_used                      249472
_cell_measurement_theta_min                        1.50
_cell_measurement_theta_max                        29.51
_cell_measurement_temperature                      100
#------------------------------------------------------------------------------
_exptl_crystal_description                         plate
_exptl_crystal_colour                              yellow
_exptl_crystal_size_max                            0.005
_exptl_crystal_size_mid                            0.005
_exptl_crystal_size_min                            0.001
_exptl_crystal_density_diffrn                      1.518
_exptl_crystal_density_meas                        ?
_exptl_crystal_density_method                     'not measured'
_exptl_crystal_F_000                               4184.00
_exptl_absorpt_coefficient_mu                      1.045
_exptl_absorpt_correction_type                     multi-scan
_exptl_absorpt_process_details
;
[c.f. z. otwinowski et al. acta cryst. (2003), a59, 228-234 ]
;
_exptl_absorpt_correction_T_min                    0.8598
_exptl_absorpt_correction_T_max                    1.0000

#==============================================================================
# EXPERIMENTAL DATA

_diffrn_ambient_temperature                        100(2) 
_diffrn_radiation_type                             synchrotron
_diffrn_radiation_wavelength                       0.63000
_diffrn_radiation_source                           'PLSII 2D bending magnet'
_diffrn_radiation_monochromator                    'Si(111) double crystal monochromator'
_diffrn_measurement_device_type                    'ADSC Q210 CCD area detector'
_diffrn_measurement_method                         \w
_diffrn_detector_area_resol_mean                   ?
_diffrn_reflns_number                              249472
_diffrn_reflns_av_R_equivalents                    0.0740
_diffrn_reflns_theta_max                           29.506
_diffrn_reflns_theta_min                           1.499
_diffrn_reflns_theta_full                          22.210
_diffrn_measured_fraction_theta_max                0.999
_diffrn_measured_fraction_theta_full               0.999
_diffrn_reflns_Laue_measured_fraction_max          0.999
_diffrn_reflns_Laue_measured_fraction_full         0.999
_diffrn_reflns_point_group_measured_fraction_max   0.999
_diffrn_reflns_point_group_measured_fraction_full  0.999
_diffrn_reflns_limit_h_min                        -40
_diffrn_reflns_limit_h_max                         39
_diffrn_reflns_limit_k_min                        -24
_diffrn_reflns_limit_k_max                         0
_diffrn_reflns_limit_l_min                         0
_diffrn_reflns_limit_l_max                         34
_diffrn_standards_number                           0
_diffrn_standards_interval_count                   .
_diffrn_standards_decay_%                          ?
_reflns_number_total                               35308
_reflns_number_gt                                  23922
_reflns_threshold_expression                       F^2^>2.0\s(F^2^)
_reflns_Friedel_coverage          0.000
_reflns_Friedel_fraction_max      .
_reflns_Friedel_fraction_full     .

#==============================================================================
# REFINEMENT DATA

_refine_special_details
;
    Refinement was performed using all reflections. The weighted 
    R-factor (wR) and goodness of fit (S) are based on F^2^.
    R-factor (gt) are based on F. The threshold expression of
    F^2^ > 2.0 sigma(F^2^) is used only for calculating R-factor (gt).
;
_refine_ls_structure_factor_coef                   Fsqd
_refine_ls_R_factor_all                            0.0842
_refine_ls_R_factor_gt                             0.0565
_refine_ls_wR_factor_ref                           0.1652
_refine_ls_wR_factor_gt                            0.1520
_refine_ls_number_restraints                       0
_refine_ls_hydrogen_treatment                      mixed
_refine_ls_number_reflns                           35308
_refine_ls_number_parameters                       1041
_refine_ls_goodness_of_fit_ref                     0.968
_refine_ls_weighting_scheme                        calc
_refine_ls_weighting_details
                   'w = 1/[\s^2^(Fo^2^)+(0.1144P)^2^] where P=(Fo^2^+2Fc^2^)/3'
_atom_sites_solution_hydrogens                     geom
_atom_sites_solution_primary                       direct
_atom_sites_solution_secondary                     difmap
_refine_ls_shift/su_max                            0.002
_refine_diff_density_max                           1.05
_refine_diff_density_min                          -1.86
_refine_ls_extinction_method                       none
_refine_ls_extinction_coef                         ?

loop_
_atom_type_symbol
_atom_type_description
_atom_type_scat_dispersion_real
_atom_type_scat_dispersion_imag
_atom_type_scat_source
  'C' 'C'  0.0000 0.0000 
;
International Tables for Crystallography
(Vol. C, Tables 4.2.6.8 and 6.1.1.4)
;
  'H' 'H'  0.0000 0.0000 
;
International Tables for Crystallography
(Vol. C, Table 6.1.1.4)
;
  'N' 'N'  0.0000 0.0000 
;
International Tables for Crystallography
(Vol. C, Tables 4.2.6.8 and 6.1.1.4)
;
  'O' 'O'  0.0000 0.0000 
;
International Tables for Crystallography
(Vol. C, Tables 4.2.6.8 and 6.1.1.4)
;
  'V' 'V'  0.0000 0.0000 
;
International Tables for Crystallography
(Vol. C, Tables 4.2.6.8 and 6.1.1.4)
;

#==============================================================================
# ATOMIC COORDINATES AND THERMAL PARAMETERS

loop_
 _atom_site_label
 _atom_site_type_symbol
 _atom_site_fract_x
 _atom_site_fract_y
 _atom_site_fract_z
 _atom_site_U_iso_or_equiv
 _atom_site_adp_type
 _atom_site_occupancy
 _atom_site_site_symmetry_order  
 _atom_site_calc_flag
 _atom_site_refinement_flags_posn
 _atom_site_refinement_flags_adp
 _atom_site_refinement_flags_occupancy
 _atom_site_disorder_assembly
 _atom_site_disorder_group
V1 V 0.62053(2) 0.70745(2) 0.37152(2) 0.01468(7) Uani 1 1 d . . . . .
V2 V 0.58033(2) 0.83228(2) 0.45770(2) 0.01344(6) Uani 1 1 d . . . . .
V3 V 0.57269(2) 0.88056(2) 0.31840(2) 0.01152(6) Uani 1 1 d . . . . .
V4 V 0.52189(2) 0.66298(2) 0.42151(2) 0.01321(6) Uani 1 1 d . . . . .
V5 V 0.51557(2) 0.71204(2) 0.27414(2) 0.01090(6) Uani 1 1 d . . . . .
V6 V 0.47033(2) 0.83561(2) 0.36779(2) 0.01063(6) Uani 1 1 d . . . . .
V7 V 0.46552(2) 0.88601(2) 0.22698(2) 0.01162(6) Uani 1 1 d . . . . .
V8 V 0.40992(2) 0.66805(2) 0.32958(2) 0.01304(6) Uani 1 1 d . . . . .
V9 V 0.40848(2) 0.71751(2) 0.18382(2) 0.01328(6) Uani 1 1 d . . . . .
V10 V 0.36470(2) 0.83747(2) 0.26928(2) 0.01418(6) Uani 1 1 d . . . . .
O1 O 0.67438(6) 0.65973(9) 0.37114(7) 0.0222(3) Uani 1 1 d . . . . .
O2 O 0.63464(5) 0.76970(8) 0.44438(6) 0.0160(3) Uani 1 1 d . . . . .
O3 O 0.60308(6) 0.88012(9) 0.52297(6) 0.0184(3) Uani 1 1 d . . . . .
O4 O 0.62498(5) 0.80680(8) 0.32469(6) 0.0140(2) Uani 1 1 d . . . . .
O5 O 0.58814(5) 0.91347(8) 0.39984(6) 0.0132(2) Uani 1 1 d . . . . .
O6 O 0.58445(6) 0.62770(8) 0.40721(6) 0.0152(3) Uani 1 1 d . . . . .
O7 O 0.54844(6) 0.73434(8) 0.48249(6) 0.0148(2) Uani 1 1 d . . . . .
O8 O 0.57488(5) 0.66612(8) 0.28896(6) 0.0143(2) Uani 1 1 d . . . . .
O9 O 0.59120(5) 0.96121(8) 0.28304(6) 0.0155(3) Uani 1 1 d . . . . .
O10 O 0.53687(5) 0.76920(8) 0.36079(6) 0.0120(2) Uani 1 1 d . . . . .
O11 O 0.50323(5) 0.87404(8) 0.43718(6) 0.0137(2) Uani 1 1 d . . . . .
O12 O 0.50318(6) 0.58211(8) 0.45605(6) 0.0184(3) Uani 1 1 d . . . . .
O13 O 0.53067(5) 0.81621(8) 0.24403(6) 0.0115(2) Uani 1 1 d . . . . .
O14 O 0.49673(5) 0.91118(7) 0.31421(5) 0.0108(2) Uani 1 1 d . . . . .
O15 O 0.48685(5) 0.62675(8) 0.32968(6) 0.0132(2) Uani 1 1 d . . . . .
O16 O 0.45413(5) 0.72597(8) 0.39855(6) 0.0126(2) Uani 1 1 d . . . . .
O17 O 0.48514(6) 0.96420(8) 0.19072(6) 0.0155(3) Uani 1 1 d . . . . .
O18 O 0.48020(5) 0.66697(8) 0.20791(6) 0.0133(2) Uani 1 1 d . . . . .
O19 O 0.44474(5) 0.76953(8) 0.28132(6) 0.0119(2) Uani 1 1 d . . . . .
O20 O 0.40825(5) 0.87565(8) 0.35375(6) 0.0133(2) Uani 1 1 d . . . . .
O21 O 0.39225(6) 0.58773(8) 0.36453(7) 0.0192(3) Uani 1 1 d . . . . .
O22 O 0.43826(5) 0.81171(8) 0.16212(6) 0.0134(2) Uani 1 1 d . . . . .
O23 O 0.40145(5) 0.91836(8) 0.23572(6) 0.0137(2) Uani 1 1 d . . . . .
O24 O 0.39285(6) 0.62890(9) 0.24304(6) 0.0159(3) Uani 1 1 d . . . . .
O25 O 0.35714(5) 0.73683(8) 0.31954(6) 0.0156(3) Uani 1 1 d . . . . .
O26 O 0.38696(6) 0.66988(8) 0.11807(6) 0.0186(3) Uani 1 1 d . . . . .
O27 O 0.35106(5) 0.77500(8) 0.19873(6) 0.0155(3) Uani 1 1 d . . . . .
O28 O 0.31016(6) 0.88353(9) 0.26929(7) 0.0209(3) Uani 1 1 d . . . . .
O29 O 0.26493(8) 0.69772(15) 0.35073(12) 0.0551(6) Uani 1 1 d . . . . .
H68 H 0.2953 0.7100 0.3471 0.066 Uiso 1 1 calc R U . . .
O30 O 0.30337(9) 0.54149(14) 0.41611(12) 0.0517(6) Uani 1 1 d . . . . .
N1 N 0.58699(6) 0.87142(9) 0.66205(7) 0.0139(3) Uani 1 1 d . . . . .
N2 N 0.57633(7) 0.79298(9) 0.63982(7) 0.0155(3) Uani 1 1 d . . . . .
N3 N 0.32811(7) 0.35279(11) 0.40992(8) 0.0210(3) Uani 1 1 d . . . . .
N4 N 0.31749(8) 0.34315(12) 0.34714(8) 0.0245(4) Uani 1 1 d . . . . .
N5 N 0.30355(7) 0.56190(11) 0.04076(8) 0.0211(3) Uani 1 1 d . . . . .
N6 N 0.26289(8) 0.60474(15) 0.00618(10) 0.0329(5) Uani 1 1 d . . . . .
N7 N 0.33842(7) 0.90240(12) 0.07698(8) 0.0225(4) Uani 1 1 d . . . . .
N8 N 0.32648(9) 0.83391(13) 0.04153(11) 0.0345(5) Uani 1 1 d . . . . .
C1 C 0.53075(8) 0.78274(12) 0.60005(8) 0.0160(3) Uani 1 1 d . . . . .
H1 H 0.5213 0.7273 0.5850 0.019 Uiso 1 1 calc R U . . .
C2 C 0.49540(8) 0.84818(12) 0.57852(8) 0.0162(3) Uani 1 1 d . . . . .
H2 H 0.4641 0.8383 0.5477 0.019 Uiso 1 1 calc R U . . .
C3 C 0.50744(8) 0.92708(12) 0.60335(9) 0.0174(3) Uani 1 1 d . . . . .
H3 H 0.4845 0.9736 0.5911 0.021 Uiso 1 1 calc R U . . .
C4 C 0.55474(8) 0.93622(11) 0.64729(9) 0.0170(3) Uani 1 1 d . . . . .
H4 H 0.5639 0.9894 0.6668 0.020 Uiso 1 1 calc R U . . .
C5 C 0.63958(8) 0.88267(12) 0.70370(9) 0.0174(3) Uani 1 1 d . . . . .
H5A H 0.6538 0.8271 0.7200 0.021 Uiso 1 1 calc R U . . .
H5B H 0.6369 0.9187 0.7398 0.021 Uiso 1 1 calc R U . . .
C6 C 0.67621(8) 0.92377(12) 0.66743(9) 0.0174(3) Uani 1 1 d . . . . .
H6A H 0.6657 0.9834 0.6587 0.021 Uiso 1 1 calc R U . . .
H6B H 0.6727 0.8945 0.6267 0.021 Uiso 1 1 calc R U . . .
C7 C 0.73346(8) 0.92053(14) 0.70339(10) 0.0219(4) Uani 1 1 d . . . . .
H7A H 0.7443 0.8609 0.7115 0.026 Uiso 1 1 calc R U . . .
H7B H 0.7370 0.9491 0.7444 0.026 Uiso 1 1 calc R U . . .
C8 C 0.76957(8) 0.96338(15) 0.66671(11) 0.0262(4) Uani 1 1 d . . . . .
H8A H 0.7580 0.9476 0.6219 0.031 Uiso 1 1 calc R U . . .
H8B H 0.7657 1.0254 0.6697 0.031 Uiso 1 1 calc R U . . .
C9 C 0.82745(9) 0.94069(17) 0.68921(12) 0.0325(5) Uani 1 1 d . . . . .
H9A H 0.8311 0.8784 0.6899 0.039 Uiso 1 1 calc R U . . .
H9B H 0.8402 0.9615 0.7327 0.039 Uiso 1 1 calc R U . . .
C10 C 0.86182(9) 0.97784(18) 0.64797(12) 0.0335(5) Uani 1 1 d . . . . .
H10A H 0.8465 0.9630 0.6037 0.040 Uiso 1 1 calc R U . . .
H10B H 0.8617 1.0402 0.6515 0.040 Uiso 1 1 calc R U . . .
C11 C 0.91826(9) 0.94650(19) 0.66555(14) 0.0373(6) Uani 1 1 d . . . . .
H11A H 0.9182 0.8840 0.6646 0.045 Uiso 1 1 calc R U . . .
H11B H 0.9342 0.9644 0.7090 0.045 Uiso 1 1 calc R U . . .
C12 C 0.95232(9) 0.97886(18) 0.62239(13) 0.0366(6) Uani 1 1 d . . . . .
H12A H 0.9543 1.0412 0.6252 0.044 Uiso 1 1 calc R U . . .
H12B H 0.9355 0.9638 0.5786 0.044 Uiso 1 1 calc R U . . .
C13 C 1.00824(10) 0.94262(19) 0.63854(14) 0.0394(6) Uani 1 1 d . . . . .
H13A H 1.0252 0.9586 0.6821 0.047 Uiso 1 1 calc R U . . .
H13B H 1.0062 0.8802 0.6367 0.047 Uiso 1 1 calc R U . . .
C14 C 1.04230(10) 0.97267(19) 0.59533(13) 0.0382(6) Uani 1 1 d . . . . .
H14A H 1.0454 1.0349 0.5983 0.046 Uiso 1 1 calc R U . . .
H14B H 1.0247 0.9584 0.5516 0.046 Uiso 1 1 calc R U . . .
C15 C 1.09725(10) 0.9346(2) 0.60979(15) 0.0467(7) Uani 1 1 d . . . . .
H15A H 1.1153 0.9501 0.6531 0.056 Uiso 1 1 calc R U . . .
H15B H 1.0943 0.8722 0.6078 0.056 Uiso 1 1 calc R U . . .
C16 C 1.13034(11) 0.9637(2) 0.56498(16) 0.0535(8) Uani 1 1 d . . . . .
H16A H 1.1362 1.0248 0.5695 0.064 Uiso 1 1 calc R U . . .
H16B H 1.1120 0.9509 0.5218 0.064 Uiso 1 1 calc R U . . .
H16C H 1.1641 0.9342 0.5748 0.064 Uiso 1 1 calc R U . . .
C17 C 0.35467(8) 0.36709(13) 0.31922(9) 0.0200(4) Uani 1 1 d . . . . .
H17 H 0.3490 0.3593 0.2752 0.024 Uiso 1 1 calc R U . . .
C18 C 0.40225(8) 0.40353(12) 0.35089(9) 0.0170(3) Uani 1 1 d . . . . .
H18 H 0.4275 0.4221 0.3288 0.020 Uiso 1 1 calc R U . . .
C19 C 0.41093(8) 0.41137(12) 0.41452(9) 0.0166(3) Uani 1 1 d . . . . .
H19 H 0.4425 0.4355 0.4381 0.020 Uiso 1 1 calc R U . . .
C20 C 0.37214(8) 0.38292(13) 0.44382(9) 0.0188(4) Uani 1 1 d . . . . .
H20 H 0.3776 0.3853 0.4882 0.023 Uiso 1 1 calc R U . . .
C21 C 0.28428(9) 0.32911(14) 0.43996(10) 0.0248(4) Uani 1 1 d . . . . .
H21A H 0.2532 0.3645 0.4226 0.030 Uiso 1 1 calc R U . . .
H21B H 0.2949 0.3395 0.4857 0.030 Uiso 1 1 calc R U . . .
C22 C 0.27038(9) 0.23698(15) 0.42812(11) 0.0276(5) Uani 1 1 d . . . . .
H22A H 0.3023 0.2021 0.4416 0.033 Uiso 1 1 calc R U . . .
H22B H 0.2566 0.2278 0.3826 0.033 Uiso 1 1 calc R U . . .
C23 C 0.22905(10) 0.20916(16) 0.46398(12) 0.0311(5) Uani 1 1 d . . . . .
H23A H 0.2259 0.1469 0.4615 0.037 Uiso 1 1 calc R U . . .
H23B H 0.2418 0.2243 0.5087 0.037 Uiso 1 1 calc R U . . .
C24 C 0.17460(10) 0.24766(18) 0.44027(12) 0.0356(6) Uani 1 1 d . . . . .
H24A H 0.1618 0.2343 0.3952 0.043 Uiso 1 1 calc R U . . .
H24B H 0.1769 0.3099 0.4447 0.043 Uiso 1 1 calc R U . . .
C25 C 0.13552(10) 0.21341(19) 0.47704(13) 0.0388(6) Uani 1 1 d . . . . .
H25A H 0.1315 0.1518 0.4698 0.047 Uiso 1 1 calc R U . . .
H25B H 0.1502 0.2223 0.5224 0.047 Uiso 1 1 calc R U . . .
C26 C 0.08173(10) 0.2545(2) 0.45926(13) 0.0412(6) Uani 1 1 d . . . . .
H26A H 0.0661 0.2430 0.4145 0.049 Uiso 1 1 calc R U . . .
H26B H 0.0858 0.3164 0.4645 0.049 Uiso 1 1 calc R U . . .
C27 C 0.04421(10) 0.2225(2) 0.49889(14) 0.0409(6) Uani 1 1 d . . . . .
H27A H 0.0386 0.1612 0.4916 0.049 Uiso 1 1 calc R U . . .
H27B H 0.0609 0.2307 0.5438 0.049 Uiso 1 1 calc R U . . .
C28 C -0.00846(11) 0.2666(2) 0.48449(14) 0.0441(7) Uani 1 1 d . . . . .
H28A H -0.0258 0.2561 0.4401 0.053 Uiso 1 1 calc R U . . .
H28B H -0.0026 0.3282 0.4896 0.053 Uiso 1 1 calc R U . . .
C29 C -0.04513(10) 0.2387(2) 0.52545(15) 0.0422(6) Uani 1 1 d . . . . .
H29A H -0.0277 0.2485 0.5700 0.051 Uiso 1 1 calc R U . . .
H29B H -0.0516 0.1773 0.5198 0.051 Uiso 1 1 calc R U . . .
C30 C -0.09763(11) 0.2850(2) 0.51083(16) 0.0484(7) Uani 1 1 d . . . . .
H30A H -0.0907 0.3465 0.5133 0.058 Uiso 1 1 calc R U . . .
H30B H -0.1158 0.2719 0.4671 0.058 Uiso 1 1 calc R U . . .
C31 C -0.13397(12) 0.2638(2) 0.55325(18) 0.0513(8) Uani 1 1 d . . . . .
H31A H -0.1154 0.2741 0.5973 0.062 Uiso 1 1 calc R U . . .
H31B H -0.1428 0.2030 0.5490 0.062 Uiso 1 1 calc R U . . .
C32 C -0.18436(13) 0.3149(2) 0.5391(2) 0.0635(10) Uani 1 1 d . . . . .
H32A H -0.2049 0.3004 0.4972 0.076 Uiso 1 1 calc R U . . .
H32B H -0.1759 0.3753 0.5407 0.076 Uiso 1 1 calc R U . . .
H32C H -0.2048 0.3020 0.5703 0.076 Uiso 1 1 calc R U . . .
C33 C 0.26897(10) 0.63110(17) -0.04915(11) 0.0319(5) Uani 1 1 d . . . . .
H33 H 0.2407 0.6610 -0.0751 0.038 Uiso 1 1 calc R U . . .
C34 C 0.31395(9) 0.61813(13) -0.07204(10) 0.0235(4) Uani 1 1 d . . . . .
H34 H 0.3166 0.6393 -0.1118 0.028 Uiso 1 1 calc R U . . .
C35 C 0.35406(9) 0.57370(12) -0.03498(10) 0.0206(4) Uani 1 1 d . . . . .
H35 H 0.3854 0.5624 -0.0485 0.025 Uiso 1 1 calc R U . . .
C36 C 0.34767(8) 0.54561(12) 0.02296(9) 0.0184(4) Uani 1 1 d . . . . .
H36 H 0.3749 0.5147 0.0498 0.022 Uiso 1 1 calc R U . . .
C37 C 0.29519(9) 0.53280(15) 0.10207(10) 0.0276(5) Uani 1 1 d . . . . .
H37A H 0.2711 0.5721 0.1168 0.033 Uiso 1 1 calc R U . . .
H37B H 0.3290 0.5329 0.1334 0.033 Uiso 1 1 calc R U . . .
C38 C 0.27219(9) 0.44464(15) 0.09634(12) 0.0287(5) Uani 1 1 d . . . . .
H38A H 0.2987 0.4040 0.0884 0.034 Uiso 1 1 calc R U . . .
H38B H 0.2417 0.4425 0.0601 0.034 Uiso 1 1 calc R U . . .
C39 C 0.25477(10) 0.41877(16) 0.15588(12) 0.0322(5) Uani 1 1 d . . . . .
H39A H 0.2250 0.4547 0.1608 0.039 Uiso 1 1 calc R U . . .
H39B H 0.2840 0.4279 0.1928 0.039 Uiso 1 1 calc R U . . .
C40 C 0.23805(10) 0.32519(16) 0.15305(15) 0.0369(6) Uani 1 1 d . . . . .
H40A H 0.2159 0.3135 0.1109 0.044 Uiso 1 1 calc R U . . .
H40B H 0.2698 0.2896 0.1583 0.044 Uiso 1 1 calc R U . . .
C41 C 0.20785(11) 0.29883(18) 0.20218(14) 0.0406(6) Uani 1 1 d . . . . .
H41A H 0.2267 0.3197 0.2438 0.049 Uiso 1 1 calc R U . . .
H41B H 0.2069 0.2364 0.2042 0.049 Uiso 1 1 calc R U . . .
C42 C 0.15141(11) 0.33293(18) 0.18794(14) 0.0393(6) Uani 1 1 d . . . . .
H42A H 0.1525 0.3945 0.1961 0.047 Uiso 1 1 calc R U . . .
H42B H 0.1355 0.3244 0.1428 0.047 Uiso 1 1 calc R U . . .
C43 C 0.11644(11) 0.29178(18) 0.22608(14) 0.0394(6) Uani 1 1 d . . . . .
H43A H 0.1326 0.2997 0.2712 0.047 Uiso 1 1 calc R U . . .
H43B H 0.1150 0.2303 0.2176 0.047 Uiso 1 1 calc R U . . .
C44 C 0.06065(11) 0.3260(2) 0.21271(15) 0.0427(7) Uani 1 1 d . . . . .
H44A H 0.0622 0.3876 0.2208 0.051 Uiso 1 1 calc R U . . .
H44B H 0.0446 0.3177 0.1676 0.051 Uiso 1 1 calc R U . . .
C45 C 0.02535(12) 0.2865(2) 0.25048(16) 0.0465(7) Uani 1 1 d . . . . .
H45A H 0.0199 0.2264 0.2382 0.056 Uiso 1 1 calc R U . . .
H45B H 0.0434 0.2882 0.2954 0.056 Uiso 1 1 calc R U . . .
C46 C -0.02726(13) 0.3280(2) 0.24295(17) 0.0523(8) Uani 1 1 d . . . . .
H46A H -0.0458 0.3244 0.1983 0.063 Uiso 1 1 calc R U . . .
H46B H -0.0217 0.3886 0.2535 0.063 Uiso 1 1 calc R U . . .
C47 C -0.06263(14) 0.2914(3) 0.2824(2) 0.0638(10) Uani 1 1 d . . . . .
H47A H -0.0723 0.2330 0.2681 0.077 Uiso 1 1 calc R U . . .
H47B H -0.0427 0.2881 0.3266 0.077 Uiso 1 1 calc R U . . .
C48 C -0.11195(16) 0.3411(3) 0.2801(3) 0.0873(15) Uani 1 1 d . . . . .
H48A H -0.1325 0.3436 0.2367 0.105 Uiso 1 1 calc R U . . .
H48B H -0.1029 0.3985 0.2955 0.105 Uiso 1 1 calc R U . . .
H48C H -0.1327 0.3135 0.3064 0.105 Uiso 1 1 calc R U . . .
C49 C 0.36133(12) 0.81203(16) 0.00898(12) 0.0382(6) Uani 1 1 d . . . . .
H49 H 0.3543 0.7631 -0.0167 0.046 Uiso 1 1 calc R U . . .
C50 C 0.40746(10) 0.85593(16) 0.01000(10) 0.0314(5) Uani 1 1 d . . . . .
H50 H 0.4312 0.8379 -0.0144 0.038 Uiso 1 1 calc R U . . .
C51 C 0.41756(8) 0.92569(14) 0.04716(10) 0.0241(4) Uani 1 1 d . . . . .
H51 H 0.4485 0.9581 0.0496 0.029 Uiso 1 1 calc R U . . .
C52 C 0.38120(8) 0.94762(12) 0.08121(10) 0.0208(4) Uani 1 1 d . . . . .
H52 H 0.3871 0.9957 0.1079 0.025 Uiso 1 1 calc R U . . .
C53 C 0.29722(10) 0.9277(2) 0.10972(12) 0.0408(7) Uani 1 1 d . . . . .
H53A H 0.3136 0.9547 0.1502 0.049 Uiso 1 1 calc R U . . .
H53B H 0.2779 0.8770 0.1186 0.049 Uiso 1 1 calc R U . . .
C54 C 0.25978(9) 0.98829(15) 0.06996(10) 0.0269(4) Uani 1 1 d . . . . .
H54A H 0.2450 0.9624 0.0285 0.032 Uiso 1 1 calc R U . . .
H54B H 0.2788 1.0403 0.0632 0.032 Uiso 1 1 calc R U . . .
C55 C 0.21555(11) 1.0107(2) 0.10157(13) 0.0430(7) Uani 1 1 d . . . . .
H55A H 0.1924 0.9610 0.1003 0.052 Uiso 1 1 calc R U . . .
H55B H 0.2306 1.0245 0.1461 0.052 Uiso 1 1 calc R U . . .
C56 C 0.18342(11) 1.08423(19) 0.07099(14) 0.0416(6) Uani 1 1 d . . . . .
H56A H 0.1679 1.0699 0.0266 0.050 Uiso 1 1 calc R U . . .
H56B H 0.2068 1.1335 0.0714 0.050 Uiso 1 1 calc R U . . .
C57 C 0.13898(12) 1.1088(2) 0.10356(16) 0.0467(7) Uani 1 1 d . . . . .
H57A H 0.1535 1.1110 0.1494 0.056 Uiso 1 1 calc R U . . .
H57B H 0.1266 1.1663 0.0898 0.056 Uiso 1 1 calc R U . . .
C58 C 0.09247(12) 1.0495(2) 0.09064(16) 0.0479(7) Uani 1 1 d . . . . .
H58A H 0.1048 0.9914 0.1026 0.057 Uiso 1 1 calc R U . . .
H58B H 0.0765 1.0495 0.0451 0.057 Uiso 1 1 calc R U . . .
C59 C 0.05097(12) 1.0738(2) 0.12616(16) 0.0498(8) Uani 1 1 d . . . . .
H59A H 0.0668 1.0706 0.1717 0.060 Uiso 1 1 calc R U . . .
H59B H 0.0408 1.1333 0.1162 0.060 Uiso 1 1 calc R U . . .
C60 C 0.00191(13) 1.0203(2) 0.11241(17) 0.0552(9) Uani 1 1 d . . . . .
H60A H 0.0119 0.9606 0.1218 0.066 Uiso 1 1 calc R U . . .
H60B H -0.0146 1.0243 0.0671 0.066 Uiso 1 1 calc R U . . .
C61 C -0.03853(12) 1.0458(2) 0.14984(18) 0.0557(9) Uani 1 1 d . . . . .
H61A H -0.0222 1.0396 0.1951 0.067 Uiso 1 1 calc R U . . .
H61B H -0.0470 1.1064 0.1419 0.067 Uiso 1 1 calc R U . . .
C62 C -0.08865(13) 0.9968(2) 0.13566(19) 0.0605(10) Uani 1 1 d . . . . .
H62A H -0.0804 0.9361 0.1430 0.073 Uiso 1 1 calc R U . . .
H62B H -0.1056 1.0039 0.0907 0.073 Uiso 1 1 calc R U . . .
C63 C -0.12759(13) 1.0233(2) 0.1751(2) 0.0665(11) Uani 1 1 d . . . . .
H63A H -0.1116 1.0126 0.2199 0.080 Uiso 1 1 calc R U . . .
H63B H -0.1342 1.0847 0.1699 0.080 Uiso 1 1 calc R U . . .
C64 C -0.17870(16) 0.9774(3) 0.1576(3) 0.0876(15) Uani 1 1 d . . . . .
H64A H -0.1725 0.9165 0.1630 0.105 Uiso 1 1 calc R U . . .
H64B H -0.1955 0.9894 0.1137 0.105 Uiso 1 1 calc R U . . .
H64C H -0.2016 0.9963 0.1846 0.105 Uiso 1 1 calc R U . . .
C65 C 0.22730(16) 0.7101(3) 0.2895(2) 0.0919(16) Uani 1 1 d . . . . .
H65A H 0.2274 0.7706 0.2780 0.110 Uiso 1 1 calc R U . . .
H65B H 0.1917 0.6961 0.2946 0.110 Uiso 1 1 calc R U . . .
C66 C 0.2392(2) 0.6544(5) 0.2321(3) 0.192(5) Uani 1 1 d . . . . .
H66A H 0.2259 0.5968 0.2344 0.230 Uiso 1 1 calc R U . . .
H66B H 0.2772 0.6524 0.2352 0.230 Uiso 1 1 calc R U . . .
H66C H 0.2218 0.6802 0.1921 0.230 Uiso 1 1 calc R U . . .
H66 H 0.4877(11) 0.5786(18) 0.3220(14) 0.035(8) Uiso 1 1 d . . . . .
H67 H 0.3869(19) 0.591(3) 0.235(2) 0.114(19) Uiso 1 1 d . . . . .

loop_
 _atom_site_aniso_label
 _atom_site_aniso_U_11
 _atom_site_aniso_U_22
 _atom_site_aniso_U_33
 _atom_site_aniso_U_23
 _atom_site_aniso_U_13
 _atom_site_aniso_U_12
V1 0.01967(15) 0.01362(14) 0.01091(13) 0.00094(10) 0.00378(11) 0.00376(11)
V2 0.02108(15) 0.01202(14) 0.00723(12) -0.00020(10) 0.00322(11) -0.00040(11)
V3 0.01728(14) 0.00971(13) 0.00796(12) 0.00080(9) 0.00366(10) -0.00104(10)
V4 0.02362(16) 0.00877(13) 0.00796(12) 0.00154(10) 0.00507(11) 0.00065(11)
V5 0.01917(15) 0.00734(12) 0.00710(12) -0.00026(9) 0.00490(10) 0.00113(10)
V6 0.01776(14) 0.00714(13) 0.00799(12) -0.00085(9) 0.00504(10) 0.00007(10)
V7 0.01831(15) 0.00769(13) 0.00866(12) 0.00126(9) 0.00265(10) -0.00040(10)
V8 0.02067(15) 0.00825(13) 0.01172(13) -0.00083(10) 0.00685(11) -0.00163(11)
V9 0.02070(15) 0.00892(13) 0.00994(13) -0.00192(10) 0.00292(11) -0.00083(11)
V10 0.01760(15) 0.01138(14) 0.01395(13) -0.00099(10) 0.00437(11) 0.00086(11)
O1 0.0235(7) 0.0224(7) 0.0210(7) 0.0020(6) 0.0056(6) 0.0074(6)
O2 0.0215(7) 0.0160(6) 0.0100(5) 0.0008(5) 0.0025(5) 0.0026(5)
O3 0.0271(7) 0.0186(7) 0.0089(5) -0.0012(5) 0.0031(5) -0.0026(6)
O4 0.0166(6) 0.0147(6) 0.0115(5) 0.0017(5) 0.0048(5) 0.0020(5)
O5 0.0201(6) 0.0115(6) 0.0080(5) -0.0006(4) 0.0035(5) -0.0018(5)
O6 0.0243(7) 0.0112(6) 0.0108(5) 0.0017(4) 0.0054(5) 0.0040(5)
O7 0.0252(7) 0.0114(6) 0.0081(5) 0.0007(4) 0.0041(5) 0.0003(5)
O8 0.0217(7) 0.0116(6) 0.0106(5) 0.0000(4) 0.0058(5) 0.0033(5)
O9 0.0229(7) 0.0134(6) 0.0111(5) 0.0009(5) 0.0056(5) -0.0026(5)
O10 0.0202(6) 0.0092(5) 0.0074(5) 0.0003(4) 0.0050(4) 0.0015(5)
O11 0.0230(7) 0.0105(5) 0.0085(5) -0.0006(4) 0.0054(5) -0.0013(5)
O12 0.0318(8) 0.0114(6) 0.0131(6) 0.0031(5) 0.0072(5) -0.0002(5)
O13 0.0187(6) 0.0082(5) 0.0085(5) 0.0009(4) 0.0046(4) 0.0003(5)
O14 0.0178(6) 0.0069(5) 0.0082(5) -0.0006(4) 0.0038(4) -0.0003(4)
O15 0.0239(7) 0.0064(5) 0.0106(5) -0.0010(4) 0.0064(5) 0.0009(5)
O16 0.0219(6) 0.0078(5) 0.0099(5) 0.0001(4) 0.0073(5) -0.0006(5)
O17 0.0242(7) 0.0101(6) 0.0121(6) 0.0012(4) 0.0038(5) -0.0008(5)
O18 0.0220(7) 0.0097(5) 0.0088(5) -0.0021(4) 0.0046(5) 0.0007(5)
O19 0.0184(6) 0.0079(5) 0.0102(5) -0.0006(4) 0.0051(5) 0.0006(5)
O20 0.0190(6) 0.0082(5) 0.0141(6) -0.0014(4) 0.0066(5) 0.0001(5)
O21 0.0293(8) 0.0117(6) 0.0189(6) 0.0002(5) 0.0105(6) -0.0040(5)
O22 0.0217(6) 0.0090(5) 0.0090(5) 0.0003(4) 0.0023(5) 0.0004(5)
O23 0.0187(6) 0.0094(5) 0.0128(6) 0.0005(4) 0.0028(5) 0.0013(5)
O24 0.0257(7) 0.0098(6) 0.0133(6) -0.0027(5) 0.0068(5) -0.0027(5)
O25 0.0198(6) 0.0117(6) 0.0170(6) -0.0022(5) 0.0078(5) -0.0012(5)
O26 0.0267(7) 0.0140(6) 0.0141(6) -0.0038(5) 0.0028(5) -0.0025(5)
O27 0.0195(6) 0.0115(6) 0.0150(6) -0.0016(5) 0.0030(5) -0.0002(5)
O28 0.0209(7) 0.0188(7) 0.0232(7) -0.0037(5) 0.0054(6) 0.0020(5)
O29 0.0316(11) 0.0608(14) 0.0799(17) 0.0073(13) 0.0275(11) -0.0038(10)
O30 0.0486(13) 0.0451(12) 0.0653(15) -0.0006(11) 0.0216(11) -0.0096(10)
N1 0.0210(8) 0.0100(7) 0.0119(6) -0.0003(5) 0.0065(6) -0.0003(6)
N2 0.0258(8) 0.0091(7) 0.0133(7) -0.0006(5) 0.0081(6) 0.0001(6)
N3 0.0212(8) 0.0259(9) 0.0155(7) 0.0036(6) 0.0037(6) -0.0005(7)
N4 0.0258(9) 0.0294(10) 0.0164(8) 0.0023(7) 0.0005(7) -0.0042(7)
N5 0.0186(8) 0.0243(9) 0.0191(8) 0.0044(7) 0.0014(6) -0.0022(7)
N6 0.0232(10) 0.0483(13) 0.0272(10) 0.0131(9) 0.0056(8) 0.0100(9)
N7 0.0225(9) 0.0260(9) 0.0193(8) 0.0036(7) 0.0053(7) 0.0028(7)
N8 0.0337(11) 0.0256(10) 0.0408(12) 0.0007(9) 0.0015(9) -0.0124(8)
C1 0.0263(10) 0.0122(8) 0.0113(7) -0.0015(6) 0.0081(7) -0.0024(7)
C2 0.0224(9) 0.0164(8) 0.0113(7) 0.0005(6) 0.0066(7) -0.0006(7)
C3 0.0245(9) 0.0118(8) 0.0177(8) 0.0018(6) 0.0087(7) 0.0022(7)
C4 0.0249(9) 0.0089(7) 0.0186(8) 0.0001(6) 0.0083(7) 0.0008(7)
C5 0.0224(9) 0.0165(8) 0.0134(8) 0.0003(6) 0.0042(7) -0.0001(7)
C6 0.0199(9) 0.0182(9) 0.0152(8) 0.0010(7) 0.0060(7) 0.0008(7)
C7 0.0218(10) 0.0256(10) 0.0179(9) 0.0030(7) 0.0035(7) 0.0006(8)
C8 0.0206(10) 0.0317(11) 0.0267(11) 0.0059(9) 0.0061(8) 0.0011(9)
C9 0.0211(11) 0.0414(14) 0.0345(13) 0.0070(11) 0.0054(9) 0.0012(10)
C10 0.0212(11) 0.0441(15) 0.0353(13) 0.0079(11) 0.0063(9) -0.0003(10)
C11 0.0201(11) 0.0503(16) 0.0411(14) 0.0080(12) 0.0064(10) -0.0014(11)
C12 0.0221(11) 0.0479(16) 0.0400(14) 0.0033(12) 0.0074(10) -0.0024(10)
C13 0.0216(11) 0.0533(17) 0.0431(15) 0.0040(13) 0.0068(10) -0.0042(11)
C14 0.0237(12) 0.0502(16) 0.0411(15) -0.0018(12) 0.0084(10) -0.0086(11)
C15 0.0215(12) 0.065(2) 0.0529(18) -0.0004(15) 0.0074(12) -0.0045(12)
C16 0.0275(14) 0.081(2) 0.0533(19) -0.0103(17) 0.0126(13) -0.0128(15)
C17 0.0279(10) 0.0188(9) 0.0130(8) 0.0008(7) 0.0038(7) 0.0004(8)
C18 0.0253(10) 0.0132(8) 0.0138(8) 0.0021(6) 0.0072(7) -0.0001(7)
C19 0.0231(9) 0.0128(8) 0.0141(8) 0.0004(6) 0.0045(7) 0.0008(7)
C20 0.0224(9) 0.0210(9) 0.0125(8) 0.0008(7) 0.0030(7) 0.0023(7)
C21 0.0243(10) 0.0297(11) 0.0221(10) -0.0007(8) 0.0089(8) -0.0003(8)
C22 0.0291(11) 0.0315(12) 0.0236(10) -0.0017(9) 0.0090(9) -0.0016(9)
C23 0.0292(12) 0.0363(13) 0.0295(12) 0.0009(10) 0.0101(9) -0.0052(10)
C24 0.0313(13) 0.0476(15) 0.0289(12) 0.0003(11) 0.0085(10) -0.0060(11)
C25 0.0300(13) 0.0531(17) 0.0362(14) -0.0007(12) 0.0135(11) -0.0090(12)
C26 0.0309(13) 0.0575(18) 0.0347(14) 0.0003(13) 0.0066(11) -0.0069(12)
C27 0.0295(13) 0.0548(17) 0.0403(15) -0.0015(13) 0.0116(11) -0.0107(12)
C28 0.0308(14) 0.0607(19) 0.0402(15) 0.0032(14) 0.0070(11) -0.0083(13)
C29 0.0280(13) 0.0528(17) 0.0461(16) 0.0003(13) 0.0090(12) -0.0048(12)
C30 0.0328(15) 0.0576(19) 0.0558(19) 0.0109(15) 0.0119(13) -0.0008(13)
C31 0.0328(15) 0.0530(19) 0.071(2) 0.0077(16) 0.0174(15) -0.0011(13)
C32 0.0350(17) 0.062(2) 0.095(3) 0.003(2) 0.0174(18) -0.0006(15)
C33 0.0291(12) 0.0397(14) 0.0253(11) 0.0094(10) 0.0031(9) 0.0113(10)
C34 0.0326(11) 0.0194(9) 0.0180(9) 0.0021(7) 0.0048(8) 0.0014(8)
C35 0.0248(10) 0.0164(9) 0.0204(9) -0.0040(7) 0.0047(8) -0.0003(7)
C36 0.0215(9) 0.0129(8) 0.0189(8) -0.0010(7) 0.0005(7) -0.0001(7)
C37 0.0262(11) 0.0359(12) 0.0203(10) 0.0078(9) 0.0042(8) -0.0052(9)
C38 0.0224(10) 0.0320(12) 0.0331(12) 0.0090(10) 0.0090(9) 0.0014(9)
C39 0.0242(11) 0.0393(14) 0.0326(12) 0.0123(10) 0.0052(9) -0.0024(10)
C40 0.0275(12) 0.0341(13) 0.0532(17) 0.0127(12) 0.0177(12) 0.0040(10)
C41 0.0370(14) 0.0387(14) 0.0434(15) 0.0152(12) 0.0033(12) -0.0079(11)
C42 0.0346(14) 0.0434(15) 0.0414(15) 0.0137(12) 0.0119(11) -0.0004(11)
C43 0.0361(14) 0.0404(15) 0.0412(15) 0.0126(12) 0.0075(12) -0.0034(11)
C44 0.0397(15) 0.0470(16) 0.0445(16) 0.0122(13) 0.0159(13) 0.0025(12)
C45 0.0409(16) 0.0474(17) 0.0526(18) 0.0117(14) 0.0134(14) -0.0045(13)
C46 0.0491(18) 0.0523(19) 0.062(2) 0.0129(16) 0.0266(16) 0.0017(15)
C47 0.0424(19) 0.076(3) 0.079(3) 0.021(2) 0.0258(18) 0.0008(17)
C48 0.060(3) 0.094(3) 0.121(4) 0.022(3) 0.049(3) 0.001(2)
C49 0.0534(17) 0.0243(12) 0.0323(13) -0.0141(10) -0.0004(12) -0.0028(11)
C50 0.0403(14) 0.0389(13) 0.0177(9) 0.0037(9) 0.0120(9) 0.0143(11)
C51 0.0205(10) 0.0271(11) 0.0234(10) 0.0123(8) 0.0025(8) -0.0017(8)
C52 0.0271(10) 0.0124(8) 0.0190(9) -0.0013(7) -0.0027(8) -0.0006(7)
C53 0.0311(13) 0.0666(19) 0.0283(12) 0.0157(12) 0.0140(10) 0.0211(13)
C54 0.0255(11) 0.0314(12) 0.0218(10) -0.0024(9) 0.0013(8) 0.0059(9)
C55 0.0343(14) 0.0605(19) 0.0348(14) 0.0109(13) 0.0094(11) 0.0204(13)
C56 0.0359(14) 0.0462(16) 0.0433(15) 0.0050(13) 0.0102(12) 0.0137(12)
C57 0.0385(16) 0.0520(18) 0.0511(18) 0.0035(14) 0.0133(13) 0.0172(13)
C58 0.0383(16) 0.0593(19) 0.0470(17) -0.0005(15) 0.0118(13) 0.0137(14)
C59 0.0367(15) 0.063(2) 0.0491(18) 0.0013(15) 0.0085(13) 0.0181(14)
C60 0.0417(17) 0.068(2) 0.054(2) -0.0074(17) 0.0090(15) 0.0135(16)
C61 0.0368(16) 0.066(2) 0.060(2) -0.0065(17) 0.0028(15) 0.0128(15)
C62 0.0421(18) 0.061(2) 0.073(3) -0.0067(19) 0.0014(17) 0.0081(16)
C63 0.0350(17) 0.063(2) 0.096(3) -0.008(2) 0.0039(19) 0.0016(16)
C64 0.052(2) 0.085(3) 0.120(4) 0.012(3) 0.008(3) -0.006(2)
C65 0.038(2) 0.122(4) 0.109(4) 0.021(3) 0.001(2) -0.021(2)
C66 0.116(5) 0.291(10) 0.180(7) -0.167(8) 0.059(5) -0.121(6)

#==============================================================================
_computing_data_collection            'PAL ADSC Quantum-210 ADX Program'
_computing_cell_refinement            'HKL3000'
_computing_data_reduction             'HKL3000'
_computing_structure_solutio          'SHELXT Version 2014/5 (Sheldrick, 2014)'
_computing_structure_refinemen        'SHELXL Version 2014/7 (Sheldrick, 2008)'
_computing_publication_material       'CrystalStructure 4.2 (Rigaku, 2017)'
_computing_molecular_graphics         'CrystalStructure 4.2'

#==============================================================================
# MOLECULAR GEOMETRY

_geom_special_details
;
 All esds (except the esd in the dihedral angle between two l.s. planes)
 are estimated using the full covariance matrix.  The cell esds are taken
 into account individually in the estimation of esds in distances, angles
 and torsion angles; correlations between esds in cell parameters are only
 used when they are defined by crystal symmetry.  An approximate (isotropic)
 treatment of cell esds is used for estimating esds involving l.s. planes.
;

loop_
 _geom_bond_atom_site_label_1
 _geom_bond_atom_site_label_2
 _geom_bond_distance
 _geom_bond_site_symmetry_2
 _geom_bond_publ_flag
V1 O1 1.6013(15) . ?
V1 O2 1.8396(13) . ?
V1 O6 1.8523(14) . ?
V1 O4 1.8951(13) . ?
V1 O8 2.0357(14) . ?
V1 O10 2.3611(13) . ?
V1 V5 3.0737(5) . ?
V1 V2 3.0772(5) . ?
V1 V4 3.1053(5) . ?
V2 O3 1.6075(14) . ?
V2 O2 1.8099(14) . ?
V2 O5 1.8479(13) . ?
V2 O7 1.8974(13) . ?
V2 O11 2.0745(14) . ?
V2 O10 2.3871(13) . ?
V2 V4 3.0983(5) . ?
V2 V6 3.0989(5) . ?
V2 V3 3.1058(5) . ?
V3 O9 1.6229(13) . ?
V3 O4 1.7808(13) . ?
V3 O5 1.8129(13) . ?
V3 O13 2.0216(13) . ?
V3 O14 2.0288(13) . ?
V3 O10 2.2895(13) . ?
V3 V7 3.0565(5) . ?
V3 V5 3.1039(5) . ?
V4 O12 1.6181(14) . ?
V4 O7 1.7664(13) . ?
V4 O6 1.8233(14) . ?
V4 O16 1.9977(14) . ?
V4 O15 2.0920(13) . ?
V4 O10 2.2322(13) . ?
V5 O8 1.6783(14) . ?
V5 O18 1.6912(13) . ?
V5 O13 1.8514(13) . ?
V5 O10 2.0612(12) . ?
V5 O15 2.0688(13) . ?
V5 O19 2.1034(13) . ?
V5 V9 3.0441(5) . ?
V6 O11 1.6812(13) . ?
V6 O20 1.7066(14) . ?
V6 O14 1.9110(12) . ?
V6 O16 1.9426(12) . ?
V6 O10 2.0699(13) . ?
V6 O19 2.1335(13) . ?
V6 V10 3.0982(5) . ?
V6 V8 3.1042(5) . ?
V7 O17 1.6157(13) . ?
V7 O23 1.8052(14) . ?
V7 O22 1.8573(13) . ?
V7 O14 1.9405(12) . ?
V7 O13 1.9954(13) . ?
V7 O19 2.3246(13) . ?
V7 V10 3.0861(5) . ?
V7 V9 3.0979(5) . ?
V8 O21 1.6050(14) . ?
V8 O25 1.7337(14) . ?
V8 O16 1.9151(13) . ?
V8 O24 1.9465(14) . ?
V8 O15 2.1171(14) . ?
V8 O19 2.2279(13) . ?
V8 V10 3.1028(5) . ?
V9 O26 1.6094(14) . ?
V9 O22 1.7956(13) . ?
V9 O27 1.8487(14) . ?
V9 O18 1.9989(14) . ?
V9 O24 2.0139(14) . ?
V9 O19 2.2840(13) . ?
V9 V10 3.0645(5) . ?
V10 O28 1.6034(15) . ?
V10 O27 1.8002(13) . ?
V10 O23 1.8507(13) . ?
V10 O25 1.9711(14) . ?
V10 O20 2.0321(13) . ?
V10 O19 2.3167(13) . ?
O15 H66 0.78(3) . ?
O24 H67 0.63(5) . ?
O29 C65 1.486(5) . ?
O29 H68 0.8400 . ?
N1 C4 1.321(2) . ?
N1 N2 1.340(2) . ?
N1 C5 1.480(2) . ?
N2 C1 1.318(3) . ?
N3 C20 1.311(3) . ?
N3 N4 1.348(2) . ?
N3 C21 1.494(3) . ?
N4 C17 1.317(3) . ?
N5 C36 1.325(3) . ?
N5 N6 1.342(3) . ?
N5 C37 1.481(3) . ?
N6 C33 1.324(3) . ?
N7 C52 1.315(3) . ?
N7 N8 1.329(3) . ?
N7 C53 1.479(3) . ?
N8 C49 1.325(4) . ?
C1 C2 1.398(3) . ?
C1 H1 0.9500 . ?
C2 C3 1.370(3) . ?
C2 H2 0.9500 . ?
C3 C4 1.393(3) . ?
C3 H3 0.9500 . ?
C4 H4 0.9500 . ?
C5 C6 1.523(3) . ?
C5 H5A 0.9900 . ?
C5 H5B 0.9900 . ?
C6 C7 1.528(3) . ?
C6 H6A 0.9900 . ?
C6 H6B 0.9900 . ?
C7 C8 1.531(3) . ?
C7 H7A 0.9900 . ?
C7 H7B 0.9900 . ?
C8 C9 1.526(3) . ?
C8 H8A 0.9900 . ?
C8 H8B 0.9900 . ?
C9 C10 1.529(3) . ?
C9 H9A 0.9900 . ?
C9 H9B 0.9900 . ?
C10 C11 1.523(3) . ?
C10 H10A 0.9900 . ?
C10 H10B 0.9900 . ?
C11 C12 1.527(4) . ?
C11 H11A 0.9900 . ?
C11 H11B 0.9900 . ?
C12 C13 1.537(4) . ?
C12 H12A 0.9900 . ?
C12 H12B 0.9900 . ?
C13 C14 1.516(4) . ?
C13 H13A 0.9900 . ?
C13 H13B 0.9900 . ?
C14 C15 1.525(4) . ?
C14 H14A 0.9900 . ?
C14 H14B 0.9900 . ?
C15 C16 1.520(4) . ?
C15 H15A 0.9900 . ?
C15 H15B 0.9900 . ?
C16 H16A 0.9800 . ?
C16 H16B 0.9800 . ?
C16 H16C 0.9800 . ?
C17 C18 1.405(3) . ?
C17 H17 0.9500 . ?
C18 C19 1.365(3) . ?
C18 H18 0.9500 . ?
C19 C20 1.393(3) . ?
C19 H19 0.9500 . ?
C20 H20 0.9500 . ?
C21 C22 1.511(3) . ?
C21 H21A 0.9900 . ?
C21 H21B 0.9900 . ?
C22 C23 1.538(3) . ?
C22 H22A 0.9900 . ?
C22 H22B 0.9900 . ?
C23 C24 1.529(4) . ?
C23 H23A 0.9900 . ?
C23 H23B 0.9900 . ?
C24 C25 1.537(3) . ?
C24 H24A 0.9900 . ?
C24 H24B 0.9900 . ?
C25 C26 1.520(4) . ?
C25 H25A 0.9900 . ?
C25 H25B 0.9900 . ?
C26 C27 1.536(4) . ?
C26 H26A 0.9900 . ?
C26 H26B 0.9900 . ?
C27 C28 1.514(4) . ?
C27 H27A 0.9900 . ?
C27 H27B 0.9900 . ?
C28 C29 1.520(4) . ?
C28 H28A 0.9900 . ?
C28 H28B 0.9900 . ?
C29 C30 1.526(4) . ?
C29 H29A 0.9900 . ?
C29 H29B 0.9900 . ?
C30 C31 1.510(4) . ?
C30 H30A 0.9900 . ?
C30 H30B 0.9900 . ?
C31 C32 1.518(4) . ?
C31 H31A 0.9900 . ?
C31 H31B 0.9900 . ?
C32 H32A 0.9800 . ?
C32 H32B 0.9800 . ?
C32 H32C 0.9800 . ?
C33 C34 1.396(3) . ?
C33 H33 0.9500 . ?
C34 C35 1.367(3) . ?
C34 H34 0.9500 . ?
C35 C36 1.389(3) . ?
C35 H35 0.9500 . ?
C36 H36 0.9500 . ?
C37 C38 1.514(3) . ?
C37 H37A 0.9900 . ?
C37 H37B 0.9900 . ?
C38 C39 1.531(3) . ?
C38 H38A 0.9900 . ?
C38 H38B 0.9900 . ?
C39 C40 1.542(4) . ?
C39 H39A 0.9900 . ?
C39 H39B 0.9900 . ?
C40 C41 1.530(4) . ?
C40 H40A 0.9900 . ?
C40 H40B 0.9900 . ?
C41 C42 1.538(4) . ?
C41 H41A 0.9900 . ?
C41 H41B 0.9900 . ?
C42 C43 1.518(4) . ?
C42 H42A 0.9900 . ?
C42 H42B 0.9900 . ?
C43 C44 1.523(4) . ?
C43 H43A 0.9900 . ?
C43 H43B 0.9900 . ?
C44 C45 1.508(4) . ?
C44 H44A 0.9900 . ?
C44 H44B 0.9900 . ?
C45 C46 1.501(4) . ?
C45 H45A 0.9900 . ?
C45 H45B 0.9900 . ?
C46 C47 1.518(4) . ?
C46 H46A 0.9900 . ?
C46 H46B 0.9900 . ?
C47 C48 1.503(5) . ?
C47 H47A 0.9900 . ?
C47 H47B 0.9900 . ?
C48 H48A 0.9800 . ?
C48 H48B 0.9800 . ?
C48 H48C 0.9800 . ?
C49 C50 1.389(4) . ?
C49 H49 0.9500 . ?
C50 C51 1.361(3) . ?
C50 H50 0.9500 . ?
C51 C52 1.380(3) . ?
C51 H51 0.9500 . ?
C52 H52 0.9500 . ?
C53 C54 1.501(3) . ?
C53 H53A 0.9900 . ?
C53 H53B 0.9900 . ?
C54 C55 1.520(3) . ?
C54 H54A 0.9900 . ?
C54 H54B 0.9900 . ?
C55 C56 1.501(4) . ?
C55 H55A 0.9900 . ?
C55 H55B 0.9900 . ?
C56 C57 1.546(4) . ?
C56 H56A 0.9900 . ?
C56 H56B 0.9900 . ?
C57 C58 1.513(4) . ?
C57 H57A 0.9900 . ?
C57 H57B 0.9900 . ?
C58 C59 1.522(4) . ?
C58 H58A 0.9900 . ?
C58 H58B 0.9900 . ?
C59 C60 1.510(5) . ?
C59 H59A 0.9900 . ?
C59 H59B 0.9900 . ?
C60 C61 1.532(5) . ?
C60 H60A 0.9900 . ?
C60 H60B 0.9900 . ?
C61 C62 1.495(5) . ?
C61 H61A 0.9900 . ?
C61 H61B 0.9900 . ?
C62 C63 1.535(5) . ?
C62 H62A 0.9900 . ?
C62 H62B 0.9900 . ?
C63 C64 1.494(5) . ?
C63 H63A 0.9900 . ?
C63 H63B 0.9900 . ?
C64 H64A 0.9800 . ?
C64 H64B 0.9800 . ?
C64 H64C 0.9800 . ?
C65 C66 1.622(7) . ?
C65 H65A 0.9900 . ?
C65 H65B 0.9900 . ?
C66 H66A 0.9800 . ?
C66 H66B 0.9800 . ?
C66 H66C 0.9800 . ?

loop_
 _geom_angle_atom_site_label_1
 _geom_angle_atom_site_label_2
 _geom_angle_atom_site_label_3
 _geom_angle
 _geom_angle_site_symmetry_1
 _geom_angle_site_symmetry_3
 _geom_angle_publ_flag
O1 V1 O2 104.65(7) . . ?
O1 V1 O6 102.39(7) . . ?
O2 V1 O6 91.19(6) . . ?
O1 V1 O4 103.09(7) . . ?
O2 V1 O4 89.99(6) . . ?
O6 V1 O4 153.31(6) . . ?
O1 V1 O8 100.62(7) . . ?
O2 V1 O8 154.70(6) . . ?
O6 V1 O8 84.40(6) . . ?
O4 V1 O8 83.23(6) . . ?
O1 V1 O10 173.15(7) . . ?
O2 V1 O10 82.19(5) . . ?
O6 V1 O10 76.92(5) . . ?
O4 V1 O10 76.83(5) . . ?
O8 V1 O10 72.53(5) . . ?
O1 V1 V5 131.11(6) . . ?
O2 V1 V5 124.13(5) . . ?
O6 V1 V5 81.22(4) . . ?
O4 V1 V5 76.12(4) . . ?
O8 V1 V5 30.57(4) . . ?
O10 V1 V5 42.07(3) . . ?
O1 V1 V2 136.88(6) . . ?
O2 V1 V2 32.23(4) . . ?
O6 V1 V2 84.32(4) . . ?
O4 V1 V2 82.56(4) . . ?
O8 V1 V2 122.48(4) . . ?
O10 V1 V2 49.97(3) . . ?
V5 V1 V2 91.939(13) . . ?
O1 V1 V4 134.30(6) . . ?
O2 V1 V4 80.54(5) . . ?
O6 V1 V4 32.06(4) . . ?
O4 V1 V4 122.46(4) . . ?
O8 V1 V4 82.65(4) . . ?
O10 V1 V4 45.74(3) . . ?
V5 V1 V4 64.245(12) . . ?
V2 V1 V4 60.150(11) . . ?
O3 V2 O2 104.75(7) . . ?
O3 V2 O5 101.85(6) . . ?
O2 V2 O5 93.28(6) . . ?
O3 V2 O7 103.25(6) . . ?
O2 V2 O7 90.67(6) . . ?
O5 V2 O7 152.67(6) . . ?
O3 V2 O11 100.88(7) . . ?
O2 V2 O11 154.30(6) . . ?
O5 V2 O11 83.30(5) . . ?
O7 V2 O11 81.52(6) . . ?
O3 V2 O10 173.20(6) . . ?
O2 V2 O10 82.05(5) . . ?
O5 V2 O10 77.66(5) . . ?
O7 V2 O10 76.13(5) . . ?
O11 V2 O10 72.32(5) . . ?
O3 V2 V1 137.57(6) . . ?
O2 V2 V1 32.82(4) . . ?
O5 V2 V1 85.41(4) . . ?
O7 V2 V1 83.37(4) . . ?
O11 V2 V1 121.54(4) . . ?
O10 V2 V1 49.24(3) . . ?
O3 V2 V4 134.17(5) . . ?
O2 V2 V4 81.15(5) . . ?
O5 V2 V4 123.44(4) . . ?
O7 V2 V4 30.98(4) . . ?
O11 V2 V4 79.64(4) . . ?
O10 V2 V4 45.79(3) . . ?
V1 V2 V4 60.374(12) . . ?
O3 V2 V6 131.33(6) . . ?
O2 V2 V6 123.92(4) . . ?
O5 V2 V6 77.53(4) . . ?
O7 V2 V6 77.86(4) . . ?
O11 V2 V6 30.48(3) . . ?
O10 V2 V6 41.87(3) . . ?
V1 V2 V6 91.105(12) . . ?
V4 V2 V6 61.199(10) . . ?
O3 V2 V3 133.25(5) . . ?
O2 V2 V3 81.64(4) . . ?
O5 V2 V3 31.62(4) . . ?
O7 V2 V3 123.17(4) . . ?
O11 V2 V3 82.29(4) . . ?
O10 V2 V3 47.05(3) . . ?
V1 V2 V3 60.724(11) . . ?
V4 V2 V3 92.494(11) . . ?
V6 V2 V3 61.859(10) . . ?
O9 V3 O4 104.19(7) . . ?
O9 V3 O5 102.64(6) . . ?
O4 V3 O5 96.66(6) . . ?
O9 V3 O13 100.31(6) . . ?
O4 V3 O13 90.03(6) . . ?
O5 V3 O13 153.67(6) . . ?
O9 V3 O14 100.73(6) . . ?
O4 V3 O14 152.72(6) . . ?
O5 V3 O14 88.51(6) . . ?
O13 V3 O14 74.63(5) . . ?
O9 V3 O10 173.18(6) . . ?
O4 V3 O10 80.93(5) . . ?
O5 V3 O10 80.98(5) . . ?
O13 V3 O10 74.95(5) . . ?
O14 V3 O10 73.43(5) . . ?
O9 V3 V7 89.69(5) . . ?
O4 V3 V7 130.15(4) . . ?
O5 V3 V7 127.09(4) . . ?
O13 V3 V7 40.14(4) . . ?
O14 V3 V7 38.60(3) . . ?
O10 V3 V7 83.54(3) . . ?
O9 V3 V5 134.58(5) . . ?
O4 V3 V5 76.61(5) . . ?
O5 V3 V5 122.57(4) . . ?
O13 V3 V5 34.89(3) . . ?
O14 V3 V5 78.06(4) . . ?
O10 V3 V5 41.60(3) . . ?
V7 V3 V5 60.916(10) . . ?
O9 V3 V2 134.60(5) . . ?
O4 V3 V2 83.42(4) . . ?
O5 V3 V2 32.31(4) . . ?
O13 V3 V2 124.68(4) . . ?
O14 V3 V2 87.00(3) . . ?
O10 V3 V2 49.75(3) . . ?
V7 V3 V2 119.686(13) . . ?
V5 V3 V2 90.822(11) . . ?
O12 V4 O7 105.17(7) . . ?
O12 V4 O6 102.52(7) . . ?
O7 V4 O6 96.35(6) . . ?
O12 V4 O16 99.60(7) . . ?
O7 V4 O16 92.64(6) . . ?
O6 V4 O16 152.97(6) . . ?
O12 V4 O15 96.83(6) . . ?
O7 V4 O15 155.97(6) . . ?
O6 V4 O15 88.08(6) . . ?
O16 V4 O15 73.97(5) . . ?
O12 V4 O10 170.64(6) . . ?
O7 V4 O10 82.89(5) . . ?
O6 V4 O10 80.95(5) . . ?
O16 V4 O10 74.94(5) . . ?
O15 V4 O10 74.47(5) . . ?
O12 V4 V2 138.50(5) . . ?
O7 V4 V2 33.57(4) . . ?
O6 V4 V2 84.15(4) . . ?
O16 V4 V2 89.53(4) . . ?
O15 V4 V2 124.51(4) . . ?
O10 V4 V2 50.04(3) . . ?
O12 V4 V1 135.08(6) . . ?
O7 V4 V1 84.55(5) . . ?
O6 V4 V1 32.63(4) . . ?
O16 V4 V1 124.08(4) . . ?
O15 V4 V1 86.69(4) . . ?
O10 V4 V1 49.24(3) . . ?
V2 V4 V1 59.476(10) . . ?
O8 V5 O18 106.62(7) . . ?
O8 V5 O13 101.04(6) . . ?
O18 V5 O13 100.96(6) . . ?
O8 V5 O10 88.09(6) . . ?
O18 V5 O10 162.86(6) . . ?
O13 V5 O10 84.35(5) . . ?
O8 V5 O15 92.72(6) . . ?
O18 V5 O15 91.56(6) . . ?
O13 V5 O15 157.78(5) . . ?
O10 V5 O15 78.71(5) . . ?
O8 V5 O19 164.97(6) . . ?
O18 V5 O19 85.74(6) . . ?
O13 V5 O19 84.51(5) . . ?
O10 V5 O19 78.50(5) . . ?
O15 V5 O19 78.14(5) . . ?
O8 V5 V9 144.45(5) . . ?
O18 V5 V9 37.84(5) . . ?
O13 V5 V9 89.03(4) . . ?
O10 V5 V9 127.06(4) . . ?
O15 V5 V9 89.79(4) . . ?
O19 V5 V9 48.57(3) . . ?
O8 V5 V1 38.09(4) . . ?
O18 V5 V1 144.54(5) . . ?
O13 V5 V1 92.20(4) . . ?
O10 V5 V1 50.14(4) . . ?
O15 V5 V1 87.93(4) . . ?
O19 V5 V1 128.56(4) . . ?
V9 V5 V1 176.746(13) . . ?
O8 V5 V3 87.28(5) . . ?
O18 V5 V3 139.61(5) . . ?
O13 V5 V3 38.66(4) . . ?
O10 V5 V3 47.52(4) . . ?
O15 V5 V3 126.22(4) . . ?
O19 V5 V3 88.60(4) . . ?
V9 V5 V3 119.084(12) . . ?
V1 V5 V3 60.784(10) . . ?
O11 V6 O20 107.49(7) . . ?
O11 V6 O14 98.37(6) . . ?
O20 V6 O14 96.85(6) . . ?
O11 V6 O16 96.75(6) . . ?
O20 V6 O16 96.91(6) . . ?
O14 V6 O16 155.45(5) . . ?
O11 V6 O10 89.03(6) . . ?
O20 V6 O10 163.46(6) . . ?
O14 V6 O10 81.08(5) . . ?
O16 V6 O10 79.95(5) . . ?
O11 V6 O19 166.58(6) . . ?
O20 V6 O19 85.83(6) . . ?
O14 V6 O19 81.19(5) . . ?
O16 V6 O19 79.64(5) . . ?
O10 V6 O19 77.63(5) . . ?
O11 V6 V10 145.02(5) . . ?
O20 V6 V10 37.57(4) . . ?
O14 V6 V10 87.52(4) . . ?
O16 V6 V10 91.09(4) . . ?
O10 V6 V10 125.94(4) . . ?
O19 V6 V10 48.36(4) . . ?
O11 V6 V2 38.75(5) . . ?
O20 V6 V2 146.21(5) . . ?
O14 V6 V2 89.26(4) . . ?
O16 V6 V2 90.53(4) . . ?
O10 V6 V2 50.33(4) . . ?
O19 V6 V2 127.96(4) . . ?
V10 V6 V2 175.511(13) . . ?
O11 V6 V8 132.70(4) . . ?
O20 V6 V8 82.09(4) . . ?
O14 V6 V8 127.04(4) . . ?
O16 V6 V8 36.12(4) . . ?
O10 V6 V8 86.11(4) . . ?
O19 V6 V8 45.86(3) . . ?
V10 V6 V8 60.034(10) . . ?
V2 V6 V8 120.008(12) . . ?
O17 V7 O23 103.97(7) . . ?
O17 V7 O22 102.67(6) . . ?
O23 V7 O22 93.16(6) . . ?
O17 V7 O14 102.50(6) . . ?
O23 V7 O14 91.82(6) . . ?
O22 V7 O14 152.31(5) . . ?
O17 V7 O13 99.35(6) . . ?
O23 V7 O13 155.91(6) . . ?
O22 V7 O13 87.51(6) . . ?
O14 V7 O13 77.17(5) . . ?
O17 V7 O19 175.07(6) . . ?
O23 V7 O19 80.78(5) . . ?
O22 V7 O19 78.17(5) . . ?
O14 V7 O19 75.79(5) . . ?
O13 V7 O19 75.78(5) . . ?
O17 V7 V3 89.80(5) . . ?
O23 V7 V3 132.53(4) . . ?
O22 V7 V3 128.28(4) . . ?
O14 V7 V3 40.71(4) . . ?
O13 V7 V3 40.78(4) . . ?
O19 V7 V3 85.94(3) . . ?
O17 V7 V10 136.63(5) . . ?
O23 V7 V10 32.88(4) . . ?
O22 V7 V10 82.24(4) . . ?
O14 V7 V10 87.36(4) . . ?
O13 V7 V10 124.00(4) . . ?
O19 V7 V10 48.21(3) . . ?
V3 V7 V10 121.151(13) . . ?
O17 V7 V9 133.99(5) . . ?
O23 V7 V9 83.18(4) . . ?
O22 V7 V9 31.40(4) . . ?
O14 V7 V9 122.91(4) . . ?
O13 V7 V9 85.01(4) . . ?
O19 V7 V9 47.21(3) . . ?
V3 V7 V9 118.883(12) . . ?
V10 V7 V9 59.411(10) . . ?
O21 V8 O25 104.49(7) . . ?
O21 V8 O16 101.04(7) . . ?
O25 V8 O16 96.97(6) . . ?
O21 V8 O24 100.62(7) . . ?
O25 V8 O24 94.34(6) . . ?
O16 V8 O24 152.14(6) . . ?
O21 V8 O15 97.58(7) . . ?
O25 V8 O15 157.64(6) . . ?
O16 V8 O15 75.05(5) . . ?
O24 V8 O15 84.92(6) . . ?
O21 V8 O19 171.99(7) . . ?
O25 V8 O19 83.52(6) . . ?
O16 V8 O19 77.85(5) . . ?
O24 V8 O19 78.25(5) . . ?
O15 V8 O19 74.44(5) . . ?
O21 V8 V10 139.81(6) . . ?
O25 V8 V10 35.60(4) . . ?
O16 V8 V10 91.48(4) . . ?
O24 V8 V10 83.09(4) . . ?
O15 V8 V10 122.59(4) . . ?
O19 V8 V10 48.15(3) . . ?
O21 V8 V6 137.11(5) . . ?
O25 V8 V6 80.82(5) . . ?
O16 V8 V6 36.73(4) . . ?
O24 V8 V6 121.66(4) . . ?
O15 V8 V6 80.62(4) . . ?
O19 V8 V6 43.41(3) . . ?
V10 V8 V6 59.887(12) . . ?
O26 V9 O22 103.73(7) . . ?
O26 V9 O27 104.74(7) . . ?
O22 V9 O27 93.28(6) . . ?
O26 V9 O18 99.56(7) . . ?
O22 V9 O18 87.93(6) . . ?
O27 V9 O18 154.61(6) . . ?
O26 V9 O24 99.70(7) . . ?
O22 V9 O24 155.82(6) . . ?
O27 V9 O24 86.39(6) . . ?
O18 V9 O24 82.37(6) . . ?
O26 V9 O19 172.67(6) . . ?
O22 V9 O19 80.47(5) . . ?
O27 V9 O19 80.80(5) . . ?
O18 V9 O19 74.40(5) . . ?
O24 V9 O19 75.61(5) . . ?
O26 V9 V5 130.69(6) . . ?
O22 V9 V5 78.71(4) . . ?
O27 V9 V5 124.44(4) . . ?
O18 V9 V5 31.27(4) . . ?
O24 V9 V5 81.59(4) . . ?
O19 V9 V5 43.67(3) . . ?
O26 V9 V10 137.11(6) . . ?
O22 V9 V10 83.79(4) . . ?
O27 V9 V10 32.39(4) . . ?
O18 V9 V10 123.08(4) . . ?
O24 V9 V10 83.09(4) . . ?
O19 V9 V10 48.69(3) . . ?
V5 V9 V10 92.177(12) . . ?
O26 V9 V7 136.30(5) . . ?
O22 V9 V7 32.61(4) . . ?
O27 V9 V7 82.97(4) . . ?
O18 V9 V7 84.54(4) . . ?
O24 V9 V7 123.88(4) . . ?
O19 V9 V7 48.32(3) . . ?
V5 V9 V7 61.115(10) . . ?
V10 V9 V7 60.102(11) . . ?
O28 V10 O27 104.25(7) . . ?
O28 V10 O23 103.22(7) . . ?
O27 V10 O23 93.41(6) . . ?
O28 V10 O25 99.52(7) . . ?
O27 V10 O25 90.55(6) . . ?
O23 V10 O25 155.17(6) . . ?
O28 V10 O20 100.41(7) . . ?
O27 V10 O20 154.89(6) . . ?
O23 V10 O20 85.44(6) . . ?
O25 V10 O20 80.74(5) . . ?
O28 V10 O19 173.58(6) . . ?
O27 V10 O19 80.86(5) . . ?
O23 V10 O19 80.10(5) . . ?
O25 V10 O19 76.35(5) . . ?
O20 V10 O19 74.21(5) . . ?
O28 V10 V9 137.57(6) . . ?
O27 V10 V9 33.37(4) . . ?
O23 V10 V9 83.47(4) . . ?
O25 V10 V9 86.49(4) . . ?
O20 V10 V9 121.97(4) . . ?
O19 V10 V9 47.78(3) . . ?
O28 V10 V7 135.17(6) . . ?
O27 V10 V7 84.05(5) . . ?
O23 V10 V7 31.97(4) . . ?
O25 V10 V7 124.72(4) . . ?
O20 V10 V7 81.79(4) . . ?
O19 V10 V7 48.43(3) . . ?
V9 V10 V7 60.487(11) . . ?
O28 V10 V6 131.21(6) . . ?
O27 V10 V6 124.36(5) . . ?
O23 V10 V6 79.66(4) . . ?
O25 V10 V6 77.91(4) . . ?
O20 V10 V6 30.80(4) . . ?
O19 V10 V6 43.49(3) . . ?
V9 V10 V6 91.183(12) . . ?
V7 V10 V6 61.433(11) . . ?
O28 V10 V8 130.31(6) . . ?
O27 V10 V8 82.69(4) . . ?
O23 V10 V8 125.75(4) . . ?
O25 V10 V8 30.80(4) . . ?
O20 V10 V8 77.79(4) . . ?
O19 V10 V8 45.76(3) . . ?
V9 V10 V8 64.200(12) . . ?
V7 V10 V8 94.182(12) . . ?
V6 V10 V8 60.079(10) . . ?
V2 O2 V1 114.96(7) . . ?
V3 O4 V1 116.44(7) . . ?
V3 O5 V2 116.07(7) . . ?
V4 O6 V1 115.31(7) . . ?
V4 O7 V2 115.44(7) . . ?
V5 O8 V1 111.34(7) . . ?
V5 O10 V6 103.55(6) . . ?
V5 O10 V4 99.79(5) . . ?
V6 O10 V4 94.25(5) . . ?
V5 O10 V3 90.87(5) . . ?
V6 O10 V3 93.90(5) . . ?
V4 O10 V3 164.69(7) . . ?
V5 O10 V1 87.79(5) . . ?
V6 O10 V1 168.59(6) . . ?
V4 O10 V1 85.02(4) . . ?
V3 O10 V1 84.43(5) . . ?
V5 O10 V2 167.57(7) . . ?
V6 O10 V2 87.80(4) . . ?
V4 O10 V2 84.18(4) . . ?
V3 O10 V2 83.20(4) . . ?
V1 O10 V2 80.79(4) . . ?
V6 O11 V2 110.77(7) . . ?
V5 O13 V7 108.49(6) . . ?
V5 O13 V3 106.45(6) . . ?
V7 O13 V3 99.08(5) . . ?
V6 O14 V7 110.20(6) . . ?
V6 O14 V3 108.05(6) . . ?
V7 O14 V3 100.69(5) . . ?
V5 O15 V4 104.31(6) . . ?
V5 O15 V8 105.68(6) . . ?
V4 O15 V8 97.26(5) . . ?
V5 O15 H66 119(2) . . ?
V4 O15 H66 116(2) . . ?
V8 O15 H66 112(2) . . ?
V8 O16 V6 107.15(6) . . ?
V8 O16 V4 107.65(6) . . ?
V6 O16 V4 106.37(6) . . ?
V5 O18 V9 110.89(6) . . ?
V5 O19 V6 99.98(5) . . ?
V5 O19 V8 100.71(5) . . ?
V6 O19 V8 90.73(5) . . ?
V5 O19 V9 87.77(4) . . ?
V6 O19 V9 170.54(7) . . ?
V8 O19 V9 93.16(5) . . ?
V5 O19 V10 169.25(6) . . ?
V6 O19 V10 88.14(4) . . ?
V8 O19 V10 86.09(5) . . ?
V9 O19 V10 83.53(4) . . ?
V5 O19 V7 89.56(5) . . ?
V6 O19 V7 90.13(5) . . ?
V8 O19 V7 169.38(7) . . ?
V9 O19 V7 84.47(4) . . ?
V10 O19 V7 83.35(4) . . ?
V6 O20 V10 111.63(6) . . ?
V9 O22 V7 116.00(7) . . ?
V7 O23 V10 115.15(7) . . ?
V8 O24 V9 111.68(7) . . ?
V8 O24 H67 125(5) . . ?
V9 O24 H67 123(5) . . ?
V8 O25 V10 113.60(7) . . ?
V10 O27 V9 114.24(7) . . ?
C65 O29 H68 109.5 . . ?
C4 N1 N2 124.17(17) . . ?
C4 N1 C5 120.73(16) . . ?
N2 N1 C5 115.06(15) . . ?
C1 N2 N1 115.90(16) . . ?
C20 N3 N4 124.76(18) . . ?
C20 N3 C21 120.44(17) . . ?
N4 N3 C21 114.76(17) . . ?
C17 N4 N3 115.92(18) . . ?
C36 N5 N6 124.42(18) . . ?
C36 N5 C37 121.56(18) . . ?
N6 N5 C37 114.02(18) . . ?
C33 N6 N5 115.5(2) . . ?
C52 N7 N8 124.7(2) . . ?
C52 N7 C53 121.5(2) . . ?
N8 N7 C53 113.8(2) . . ?
C49 N8 N7 115.3(2) . . ?
N2 C1 C2 124.25(17) . . ?
N2 C1 H1 117.9 . . ?
C2 C1 H1 117.9 . . ?
C3 C2 C1 117.80(18) . . ?
C3 C2 H2 121.1 . . ?
C1 C2 H2 121.1 . . ?
C2 C3 C4 117.21(18) . . ?
C2 C3 H3 121.4 . . ?
C4 C3 H3 121.4 . . ?
N1 C4 C3 120.47(17) . . ?
N1 C4 H4 119.8 . . ?
C3 C4 H4 119.8 . . ?
N1 C5 C6 109.77(15) . . ?
N1 C5 H5A 109.7 . . ?
C6 C5 H5A 109.7 . . ?
N1 C5 H5B 109.7 . . ?
C6 C5 H5B 109.7 . . ?
H5A C5 H5B 108.2 . . ?
C5 C6 C7 112.16(16) . . ?
C5 C6 H6A 109.2 . . ?
C7 C6 H6A 109.2 . . ?
C5 C6 H6B 109.2 . . ?
C7 C6 H6B 109.2 . . ?
H6A C6 H6B 107.9 . . ?
C6 C7 C8 111.42(17) . . ?
C6 C7 H7A 109.3 . . ?
C8 C7 H7A 109.3 . . ?
C6 C7 H7B 109.3 . . ?
C8 C7 H7B 109.3 . . ?
H7A C7 H7B 108.0 . . ?
C9 C8 C7 114.36(19) . . ?
C9 C8 H8A 108.7 . . ?
C7 C8 H8A 108.7 . . ?
C9 C8 H8B 108.7 . . ?
C7 C8 H8B 108.7 . . ?
H8A C8 H8B 107.6 . . ?
C8 C9 C10 113.1(2) . . ?
C8 C9 H9A 109.0 . . ?
C10 C9 H9A 109.0 . . ?
C8 C9 H9B 109.0 . . ?
C10 C9 H9B 109.0 . . ?
H9A C9 H9B 107.8 . . ?
C11 C10 C9 113.1(2) . . ?
C11 C10 H10A 109.0 . . ?
C9 C10 H10A 109.0 . . ?
C11 C10 H10B 109.0 . . ?
C9 C10 H10B 109.0 . . ?
H10A C10 H10B 107.8 . . ?
C10 C11 C12 113.8(2) . . ?
C10 C11 H11A 108.8 . . ?
C12 C11 H11A 108.8 . . ?
C10 C11 H11B 108.8 . . ?
C12 C11 H11B 108.8 . . ?
H11A C11 H11B 107.7 . . ?
C11 C12 C13 113.1(2) . . ?
C11 C12 H12A 109.0 . . ?
C13 C12 H12A 109.0 . . ?
C11 C12 H12B 109.0 . . ?
C13 C12 H12B 109.0 . . ?
H12A C12 H12B 107.8 . . ?
C14 C13 C12 113.8(2) . . ?
C14 C13 H13A 108.8 . . ?
C12 C13 H13A 108.8 . . ?
C14 C13 H13B 108.8 . . ?
C12 C13 H13B 108.8 . . ?
H13A C13 H13B 107.7 . . ?
C13 C14 C15 114.0(2) . . ?
C13 C14 H14A 108.7 . . ?
C15 C14 H14A 108.7 . . ?
C13 C14 H14B 108.7 . . ?
C15 C14 H14B 108.7 . . ?
H14A C14 H14B 107.6 . . ?
C16 C15 C14 113.3(3) . . ?
C16 C15 H15A 108.9 . . ?
C14 C15 H15A 108.9 . . ?
C16 C15 H15B 108.9 . . ?
C14 C15 H15B 108.9 . . ?
H15A C15 H15B 107.7 . . ?
C15 C16 H16A 109.5 . . ?
C15 C16 H16B 109.5 . . ?
H16A C16 H16B 109.5 . . ?
C15 C16 H16C 109.5 . . ?
H16A C16 H16C 109.5 . . ?
H16B C16 H16C 109.5 . . ?
N4 C17 C18 123.74(18) . . ?
N4 C17 H17 118.1 . . ?
C18 C17 H17 118.1 . . ?
C19 C18 C17 117.68(18) . . ?
C19 C18 H18 121.2 . . ?
C17 C18 H18 121.2 . . ?
C18 C19 C20 118.05(19) . . ?
C18 C19 H19 121.0 . . ?
C20 C19 H19 121.0 . . ?
N3 C20 C19 119.74(18) . . ?
N3 C20 H20 120.1 . . ?
C19 C20 H20 120.1 . . ?
N3 C21 C22 110.23(18) . . ?
N3 C21 H21A 109.6 . . ?
C22 C21 H21A 109.6 . . ?
N3 C21 H21B 109.6 . . ?
C22 C21 H21B 109.6 . . ?
H21A C21 H21B 108.1 . . ?
C21 C22 C23 111.02(19) . . ?
C21 C22 H22A 109.4 . . ?
C23 C22 H22A 109.4 . . ?
C21 C22 H22B 109.4 . . ?
C23 C22 H22B 109.4 . . ?
H22A C22 H22B 108.0 . . ?
C24 C23 C22 115.0(2) . . ?
C24 C23 H23A 108.5 . . ?
C22 C23 H23A 108.5 . . ?
C24 C23 H23B 108.5 . . ?
C22 C23 H23B 108.5 . . ?
H23A C23 H23B 107.5 . . ?
C23 C24 C25 111.2(2) . . ?
C23 C24 H24A 109.4 . . ?
C25 C24 H24A 109.4 . . ?
C23 C24 H24B 109.4 . . ?
C25 C24 H24B 109.4 . . ?
H24A C24 H24B 108.0 . . ?
C26 C25 C24 113.8(2) . . ?
C26 C25 H25A 108.8 . . ?
C24 C25 H25A 108.8 . . ?
C26 C25 H25B 108.8 . . ?
C24 C25 H25B 108.8 . . ?
H25A C25 H25B 107.7 . . ?
C25 C26 C27 112.9(2) . . ?
C25 C26 H26A 109.0 . . ?
C27 C26 H26A 109.0 . . ?
C25 C26 H26B 109.0 . . ?
C27 C26 H26B 109.0 . . ?
H26A C26 H26B 107.8 . . ?
C28 C27 C26 113.6(3) . . ?
C28 C27 H27A 108.9 . . ?
C26 C27 H27A 108.9 . . ?
C28 C27 H27B 108.9 . . ?
C26 C27 H27B 108.9 . . ?
H27A C27 H27B 107.7 . . ?
C27 C28 C29 114.3(3) . . ?
C27 C28 H28A 108.7 . . ?
C29 C28 H28A 108.7 . . ?
C27 C28 H28B 108.7 . . ?
C29 C28 H28B 108.7 . . ?
H28A C28 H28B 107.6 . . ?
C28 C29 C30 113.4(3) . . ?
C28 C29 H29A 108.9 . . ?
C30 C29 H29A 108.9 . . ?
C28 C29 H29B 108.9 . . ?
C30 C29 H29B 108.9 . . ?
H29A C29 H29B 107.7 . . ?
C31 C30 C29 115.3(3) . . ?
C31 C30 H30A 108.4 . . ?
C29 C30 H30A 108.4 . . ?
C31 C30 H30B 108.4 . . ?
C29 C30 H30B 108.4 . . ?
H30A C30 H30B 107.5 . . ?
C30 C31 C32 113.3(3) . . ?
C30 C31 H31A 108.9 . . ?
C32 C31 H31A 108.9 . . ?
C30 C31 H31B 108.9 . . ?
C32 C31 H31B 108.9 . . ?
H31A C31 H31B 107.7 . . ?
C31 C32 H32A 109.5 . . ?
C31 C32 H32B 109.5 . . ?
H32A C32 H32B 109.5 . . ?
C31 C32 H32C 109.5 . . ?
H32A C32 H32C 109.5 . . ?
H32B C32 H32C 109.5 . . ?
N6 C33 C34 124.6(2) . . ?
N6 C33 H33 117.7 . . ?
C34 C33 H33 117.7 . . ?
C35 C34 C33 117.4(2) . . ?
C35 C34 H34 121.3 . . ?
C33 C34 H34 121.3 . . ?
C34 C35 C36 118.1(2) . . ?
C34 C35 H35 121.0 . . ?
C36 C35 H35 121.0 . . ?
N5 C36 C35 119.96(19) . . ?
N5 C36 H36 120.0 . . ?
C35 C36 H36 120.0 . . ?
N5 C37 C38 110.44(19) . . ?
N5 C37 H37A 109.6 . . ?
C38 C37 H37A 109.6 . . ?
N5 C37 H37B 109.6 . . ?
C38 C37 H37B 109.6 . . ?
H37A C37 H37B 108.1 . . ?
C37 C38 C39 111.4(2) . . ?
C37 C38 H38A 109.3 . . ?
C39 C38 H38A 109.3 . . ?
C37 C38 H38B 109.3 . . ?
C39 C38 H38B 109.3 . . ?
H38A C38 H38B 108.0 . . ?
C38 C39 C40 111.1(2) . . ?
C38 C39 H39A 109.4 . . ?
C40 C39 H39A 109.4 . . ?
C38 C39 H39B 109.4 . . ?
C40 C39 H39B 109.4 . . ?
H39A C39 H39B 108.0 . . ?
C41 C40 C39 114.9(2) . . ?
C41 C40 H40A 108.5 . . ?
C39 C40 H40A 108.5 . . ?
C41 C40 H40B 108.5 . . ?
C39 C40 H40B 108.5 . . ?
H40A C40 H40B 107.5 . . ?
C40 C41 C42 112.8(2) . . ?
C40 C41 H41A 109.0 . . ?
C42 C41 H41A 109.0 . . ?
C40 C41 H41B 109.0 . . ?
C42 C41 H41B 109.0 . . ?
H41A C41 H41B 107.8 . . ?
C43 C42 C41 114.2(2) . . ?
C43 C42 H42A 108.7 . . ?
C41 C42 H42A 108.7 . . ?
C43 C42 H42B 108.7 . . ?
C41 C42 H42B 108.7 . . ?
H42A C42 H42B 107.6 . . ?
C42 C43 C44 114.4(2) . . ?
C42 C43 H43A 108.7 . . ?
C44 C43 H43A 108.7 . . ?
C42 C43 H43B 108.7 . . ?
C44 C43 H43B 108.7 . . ?
H43A C43 H43B 107.6 . . ?
C45 C44 C43 115.3(2) . . ?
C45 C44 H44A 108.5 . . ?
C43 C44 H44A 108.5 . . ?
C45 C44 H44B 108.5 . . ?
C43 C44 H44B 108.5 . . ?
H44A C44 H44B 107.5 . . ?
C46 C45 C44 114.8(3) . . ?
C46 C45 H45A 108.6 . . ?
C44 C45 H45A 108.6 . . ?
C46 C45 H45B 108.6 . . ?
C44 C45 H45B 108.6 . . ?
H45A C45 H45B 107.5 . . ?
C45 C46 C47 115.7(3) . . ?
C45 C46 H46A 108.4 . . ?
C47 C46 H46A 108.4 . . ?
C45 C46 H46B 108.4 . . ?
C47 C46 H46B 108.4 . . ?
H46A C46 H46B 107.4 . . ?
C48 C47 C46 114.3(3) . . ?
C48 C47 H47A 108.7 . . ?
C46 C47 H47A 108.7 . . ?
C48 C47 H47B 108.7 . . ?
C46 C47 H47B 108.7 . . ?
H47A C47 H47B 107.6 . . ?
C47 C48 H48A 109.5 . . ?
C47 C48 H48B 109.5 . . ?
H48A C48 H48B 109.5 . . ?
C47 C48 H48C 109.5 . . ?
H48A C48 H48C 109.5 . . ?
H48B C48 H48C 109.5 . . ?
N8 C49 C50 124.3(2) . . ?
N8 C49 H49 117.9 . . ?
C50 C49 H49 117.9 . . ?
C51 C50 C49 117.8(2) . . ?
C51 C50 H50 121.1 . . ?
C49 C50 H50 121.1 . . ?
C50 C51 C52 117.6(2) . . ?
C50 C51 H51 121.2 . . ?
C52 C51 H51 121.2 . . ?
N7 C52 C51 120.40(19) . . ?
N7 C52 H52 119.8 . . ?
C51 C52 H52 119.8 . . ?
N7 C53 C54 110.1(2) . . ?
N7 C53 H53A 109.6 . . ?
C54 C53 H53A 109.6 . . ?
N7 C53 H53B 109.6 . . ?
C54 C53 H53B 109.6 . . ?
H53A C53 H53B 108.1 . . ?
C53 C54 C55 110.5(2) . . ?
C53 C54 H54A 109.5 . . ?
C55 C54 H54A 109.5 . . ?
C53 C54 H54B 109.5 . . ?
C55 C54 H54B 109.5 . . ?
H54A C54 H54B 108.1 . . ?
C56 C55 C54 112.7(2) . . ?
C56 C55 H55A 109.1 . . ?
C54 C55 H55A 109.1 . . ?
C56 C55 H55B 109.1 . . ?
C54 C55 H55B 109.1 . . ?
H55A C55 H55B 107.8 . . ?
C55 C56 C57 113.2(3) . . ?
C55 C56 H56A 108.9 . . ?
C57 C56 H56A 108.9 . . ?
C55 C56 H56B 108.9 . . ?
C57 C56 H56B 108.9 . . ?
H56A C56 H56B 107.8 . . ?
C58 C57 C56 114.6(3) . . ?
C58 C57 H57A 108.6 . . ?
C56 C57 H57A 108.6 . . ?
C58 C57 H57B 108.6 . . ?
C56 C57 H57B 108.6 . . ?
H57A C57 H57B 107.6 . . ?
C57 C58 C59 112.7(3) . . ?
C57 C58 H58A 109.1 . . ?
C59 C58 H58A 109.1 . . ?
C57 C58 H58B 109.1 . . ?
C59 C58 H58B 109.1 . . ?
H58A C58 H58B 107.8 . . ?
C60 C59 C58 115.5(3) . . ?
C60 C59 H59A 108.4 . . ?
C58 C59 H59A 108.4 . . ?
C60 C59 H59B 108.4 . . ?
C58 C59 H59B 108.4 . . ?
H59A C59 H59B 107.5 . . ?
C59 C60 C61 113.9(3) . . ?
C59 C60 H60A 108.8 . . ?
C61 C60 H60A 108.8 . . ?
C59 C60 H60B 108.8 . . ?
C61 C60 H60B 108.8 . . ?
H60A C60 H60B 107.7 . . ?
C62 C61 C60 115.6(3) . . ?
C62 C61 H61A 108.4 . . ?
C60 C61 H61A 108.4 . . ?
C62 C61 H61B 108.4 . . ?
C60 C61 H61B 108.4 . . ?
H61A C61 H61B 107.4 . . ?
C61 C62 C63 113.9(3) . . ?
C61 C62 H62A 108.8 . . ?
C63 C62 H62A 108.8 . . ?
C61 C62 H62B 108.8 . . ?
C63 C62 H62B 108.8 . . ?
H62A C62 H62B 107.7 . . ?
C64 C63 C62 113.2(4) . . ?
C64 C63 H63A 108.9 . . ?
C62 C63 H63A 108.9 . . ?
C64 C63 H63B 108.9 . . ?
C62 C63 H63B 108.9 . . ?
H63A C63 H63B 107.8 . . ?
C63 C64 H64A 109.5 . . ?
C63 C64 H64B 109.5 . . ?
H64A C64 H64B 109.5 . . ?
C63 C64 H64C 109.5 . . ?
H64A C64 H64C 109.5 . . ?
H64B C64 H64C 109.5 . . ?
O29 C65 C66 115.0(5) . . ?
O29 C65 H65A 108.5 . . ?
C66 C65 H65A 108.5 . . ?
O29 C65 H65B 108.5 . . ?
C66 C65 H65B 108.5 . . ?
H65A C65 H65B 107.5 . . ?
C65 C66 H66A 109.5 . . ?
C65 C66 H66B 109.5 . . ?
H66A C66 H66B 109.5 . . ?
C65 C66 H66C 109.5 . . ?
H66A C66 H66C 109.5 . . ?
H66B C66 H66C 109.5 . . ?

loop_
 _geom_torsion_atom_site_label_1
 _geom_torsion_atom_site_label_2
 _geom_torsion_atom_site_label_3
 _geom_torsion_atom_site_label_4
 _geom_torsion
 _geom_torsion_site_symmetry_1
 _geom_torsion_site_symmetry_2
 _geom_torsion_site_symmetry_3
 _geom_torsion_site_symmetry_4
 _geom_torsion_publ_flag
O3 V2 O2 V1 -179.48(8) . . . . ?
O5 V2 O2 V1 -76.31(8) . . . . ?
O7 V2 O2 V1 76.63(8) . . . . ?
O11 V2 O2 V1 5.03(18) . . . . ?
O10 V2 O2 V1 0.73(7) . . . . ?
V4 V2 O2 V1 47.04(6) . . . . ?
V6 V2 O2 V1 0.85(10) . . . . ?
V3 V2 O2 V1 -46.83(6) . . . . ?
O1 V1 O2 V2 179.50(8) . . . . ?
O6 V1 O2 V2 -77.37(8) . . . . ?
O4 V1 O2 V2 75.96(8) . . . . ?
O8 V1 O2 V2 2.02(18) . . . . ?
O10 V1 O2 V2 -0.74(7) . . . . ?
V5 V1 O2 V2 2.82(10) . . . . ?
V4 V1 O2 V2 -47.00(6) . . . . ?
O9 V3 O4 V1 173.94(7) . . . . ?
O5 V3 O4 V1 69.06(8) . . . . ?
O13 V3 O4 V1 -85.42(8) . . . . ?
O14 V3 O4 V1 -30.70(16) . . . . ?
O10 V3 O4 V1 -10.67(7) . . . . ?
V7 V3 O4 V1 -84.19(8) . . . . ?
V5 V3 O4 V1 -52.90(6) . . . . ?
V2 V3 O4 V1 39.52(6) . . . . ?
O1 V1 O4 V3 -176.55(8) . . . . ?
O2 V1 O4 V3 -71.50(8) . . . . ?
O6 V1 O4 V3 21.13(17) . . . . ?
O8 V1 O4 V3 84.07(8) . . . . ?
O10 V1 O4 V3 10.49(7) . . . . ?
V5 V1 O4 V3 53.82(6) . . . . ?
V2 V1 O4 V3 -40.05(6) . . . . ?
V4 V1 O4 V3 7.26(9) . . . . ?
O9 V3 O5 V2 -172.59(8) . . . . ?
O4 V3 O5 V2 -66.39(8) . . . . ?
O13 V3 O5 V2 37.33(17) . . . . ?
O14 V3 O5 V2 86.75(8) . . . . ?
O10 V3 O5 V2 13.29(7) . . . . ?
V7 V3 O5 V2 88.06(8) . . . . ?
V5 V3 O5 V2 11.95(10) . . . . ?
O3 V2 O5 V3 174.06(8) . . . . ?
O2 V2 O5 V3 68.25(8) . . . . ?
O7 V2 O5 V3 -29.59(17) . . . . ?
O11 V2 O5 V3 -86.17(8) . . . . ?
O10 V2 O5 V3 -12.88(7) . . . . ?
V1 V2 O5 V3 36.36(7) . . . . ?
V4 V2 O5 V3 -13.30(10) . . . . ?
V6 V2 O5 V3 -55.80(6) . . . . ?
O12 V4 O6 V1 -176.58(8) . . . . ?
O7 V4 O6 V1 -69.46(8) . . . . ?
O16 V4 O6 V1 39.21(16) . . . . ?
O15 V4 O6 V1 86.85(8) . . . . ?
O10 V4 O6 V1 12.27(7) . . . . ?
V2 V4 O6 V1 -38.12(6) . . . . ?
O1 V1 O6 V4 175.23(8) . . . . ?
O2 V1 O6 V4 69.95(8) . . . . ?
O4 V1 O6 V4 -22.39(17) . . . . ?
O8 V1 O6 V4 -85.09(8) . . . . ?
O10 V1 O6 V4 -11.76(7) . . . . ?
V5 V1 O6 V4 -54.43(6) . . . . ?
V2 V1 O6 V4 38.42(6) . . . . ?
O12 V4 O7 V2 174.16(8) . . . . ?
O6 V4 O7 V2 69.32(8) . . . . ?
O16 V4 O7 V2 -85.15(8) . . . . ?
O15 V4 O7 V2 -30.3(2) . . . . ?
O10 V4 O7 V2 -10.70(7) . . . . ?
V1 V4 O7 V2 38.84(7) . . . . ?
O3 V2 O7 V4 -176.75(8) . . . . ?
O2 V2 O7 V4 -71.43(8) . . . . ?
O5 V2 O7 V4 27.04(17) . . . . ?
O11 V2 O7 V4 83.98(8) . . . . ?
O10 V2 O7 V4 10.22(7) . . . . ?
V1 V2 O7 V4 -39.36(7) . . . . ?
V6 V2 O7 V4 53.21(7) . . . . ?
V3 V2 O7 V4 9.02(10) . . . . ?
O18 V5 O8 V1 -175.60(6) . . . . ?
O13 V5 O8 V1 79.31(7) . . . . ?
O10 V5 O8 V1 -4.56(7) . . . . ?
O15 V5 O8 V1 -83.16(7) . . . . ?
O19 V5 O8 V1 -31.2(3) . . . . ?
V9 V5 O8 V1 -176.61(2) . . . . ?
V3 V5 O8 V1 43.00(6) . . . . ?
O20 V6 O11 V2 -178.17(6) . . . . ?
O14 V6 O11 V2 -78.23(7) . . . . ?
O16 V6 O11 V2 82.38(7) . . . . ?
O10 V6 O11 V2 2.61(6) . . . . ?
O19 V6 O11 V2 8.9(3) . . . . ?
V10 V6 O11 V2 -175.93(2) . . . . ?
V8 V6 O11 V2 86.42(7) . . . . ?
O8 V5 O13 V7 -177.05(6) . . . . ?
O18 V5 O13 V7 73.40(7) . . . . ?
O10 V5 O13 V7 -90.12(6) . . . . ?
O15 V5 O13 V7 -49.78(18) . . . . ?
O19 V5 O13 V7 -11.17(6) . . . . ?
V9 V5 O13 V7 37.28(5) . . . . ?
V1 V5 O13 V7 -139.70(5) . . . . ?
V3 V5 O13 V7 -105.80(8) . . . . ?
O8 V5 O13 V3 -71.25(7) . . . . ?
O18 V5 O13 V3 179.20(6) . . . . ?
O10 V5 O13 V3 15.68(6) . . . . ?
O15 V5 O13 V3 56.02(18) . . . . ?
O19 V5 O13 V3 94.63(6) . . . . ?
V9 V5 O13 V3 143.08(5) . . . . ?
V1 V5 O13 V3 -33.90(5) . . . . ?
O8 V5 O18 V9 -179.05(6) . . . . ?
O13 V5 O18 V9 -73.89(7) . . . . ?
O10 V5 O18 V9 32.8(2) . . . . ?
O15 V5 O18 V9 87.65(7) . . . . ?
O19 V5 O18 V9 9.67(6) . . . . ?
V1 V5 O18 V9 176.28(2) . . . . ?
V3 V5 O18 V9 -73.13(9) . . . . ?
O11 V6 O20 V10 177.89(6) . . . . ?
O14 V6 O20 V10 76.85(7) . . . . ?
O16 V6 O20 V10 -82.77(7) . . . . ?
O10 V6 O20 V10 -4.8(2) . . . . ?
O19 V6 O20 V10 -3.74(6) . . . . ?
V2 V6 O20 V10 175.83(2) . . . . ?
V8 V6 O20 V10 -49.73(5) . . . . ?
O26 V9 O22 V7 177.56(8) . . . . ?
O27 V9 O22 V7 71.51(8) . . . . ?
O18 V9 O22 V7 -83.10(8) . . . . ?
O24 V9 O22 V7 -17.0(2) . . . . ?
O19 V9 O22 V7 -8.58(7) . . . . ?
V5 V9 O22 V7 -52.98(6) . . . . ?
V10 V9 O22 V7 40.50(6) . . . . ?
O17 V7 O22 V9 -176.48(8) . . . . ?
O23 V7 O22 V9 -71.40(8) . . . . ?
O14 V7 O22 V9 28.61(17) . . . . ?
O13 V7 O22 V9 84.49(8) . . . . ?
O19 V7 O22 V9 8.50(7) . . . . ?
V3 V7 O22 V9 83.57(8) . . . . ?
V10 V7 O22 V9 -40.32(7) . . . . ?
O17 V7 O23 V10 174.34(7) . . . . ?
O22 V7 O23 V10 70.45(8) . . . . ?
O14 V7 O23 V10 -82.30(7) . . . . ?
O13 V7 O23 V10 -20.54(18) . . . . ?
O19 V7 O23 V10 -7.02(7) . . . . ?
V3 V7 O23 V10 -82.76(8) . . . . ?
V9 V7 O23 V10 40.63(6) . . . . ?
O28 V10 O23 V7 -178.55(8) . . . . ?
O27 V10 O23 V7 -73.05(8) . . . . ?
O25 V10 O23 V7 25.66(18) . . . . ?
O20 V10 O23 V7 81.80(7) . . . . ?
O19 V10 O23 V7 7.06(7) . . . . ?
V9 V10 O23 V7 -41.14(6) . . . . ?
V6 V10 O23 V7 51.27(6) . . . . ?
V8 V10 O23 V7 10.39(9) . . . . ?
O21 V8 O25 V10 -173.89(7) . . . . ?
O16 V8 O25 V10 82.76(7) . . . . ?
O24 V8 O25 V10 -71.74(8) . . . . ?
O15 V8 O25 V10 15.4(2) . . . . ?
O19 V8 O25 V10 5.90(7) . . . . ?
V6 V8 O25 V10 49.66(6) . . . . ?
O28 V10 O27 V9 177.26(8) . . . . ?
O23 V10 O27 V9 72.70(8) . . . . ?
O25 V10 O27 V9 -82.78(8) . . . . ?
O20 V10 O27 V9 -13.82(18) . . . . ?
O19 V10 O27 V9 -6.70(7) . . . . ?
V7 V10 O27 V9 42.09(6) . . . . ?
V6 V10 O27 V9 -7.09(10) . . . . ?
V8 V10 O27 V9 -52.92(6) . . . . ?
O26 V9 O27 V10 -178.12(7) . . . . ?
O22 V9 O27 V10 -72.99(8) . . . . ?
O18 V9 O27 V10 19.09(18) . . . . ?
O24 V9 O27 V10 82.79(8) . . . . ?
O19 V9 O27 V10 6.79(7) . . . . ?
V5 V9 O27 V10 5.56(10) . . . . ?
V7 V9 O27 V10 -42.00(6) . . . . ?
C4 N1 N2 C1 1.1(3) . . . . ?
C5 N1 N2 C1 -176.58(15) . . . . ?
C20 N3 N4 C17 -0.7(3) . . . . ?
C21 N3 N4 C17 177.14(19) . . . . ?
C36 N5 N6 C33 0.2(3) . . . . ?
C37 N5 N6 C33 -179.5(2) . . . . ?
C52 N7 N8 C49 0.0(3) . . . . ?
C53 N7 N8 C49 176.6(2) . . . . ?
N1 N2 C1 C2 3.0(3) . . . . ?
N2 C1 C2 C3 -4.2(3) . . . . ?
C1 C2 C3 C4 1.4(3) . . . . ?
N2 N1 C4 C3 -3.9(3) . . . . ?
C5 N1 C4 C3 173.72(17) . . . . ?
C2 C3 C4 N1 2.4(3) . . . . ?
C4 N1 C5 C6 -76.5(2) . . . . ?
N2 N1 C5 C6 101.31(18) . . . . ?
N1 C5 C6 C7 -168.18(16) . . . . ?
C5 C6 C7 C8 -179.08(17) . . . . ?
C6 C7 C8 C9 -162.7(2) . . . . ?
C7 C8 C9 C10 174.7(2) . . . . ?
C8 C9 C10 C11 -172.9(2) . . . . ?
C9 C10 C11 C12 176.6(2) . . . . ?
C10 C11 C12 C13 -176.7(2) . . . . ?
C11 C12 C13 C14 178.8(2) . . . . ?
C12 C13 C14 C15 -178.1(3) . . . . ?
C13 C14 C15 C16 178.5(3) . . . . ?
N3 N4 C17 C18 -2.2(3) . . . . ?
N4 C17 C18 C19 2.6(3) . . . . ?
C17 C18 C19 C20 -0.1(3) . . . . ?
N4 N3 C20 C19 3.1(3) . . . . ?
C21 N3 C20 C19 -174.59(18) . . . . ?
C18 C19 C20 N3 -2.6(3) . . . . ?
C20 N3 C21 C22 -121.2(2) . . . . ?
N4 N3 C21 C22 60.8(2) . . . . ?
N3 C21 C22 C23 174.48(18) . . . . ?
C21 C22 C23 C24 68.7(3) . . . . ?
C22 C23 C24 C25 177.6(2) . . . . ?
C23 C24 C25 C26 175.4(2) . . . . ?
C24 C25 C26 C27 -177.1(2) . . . . ?
C25 C26 C27 C28 176.5(2) . . . . ?
C26 C27 C28 C29 -177.2(3) . . . . ?
C27 C28 C29 C30 179.1(3) . . . . ?
C28 C29 C30 C31 -176.0(3) . . . . ?
C29 C30 C31 C32 176.8(3) . . . . ?
N5 N6 C33 C34 -0.9(4) . . . . ?
N6 C33 C34 C35 1.2(4) . . . . ?
C33 C34 C35 C36 -0.8(3) . . . . ?
N6 N5 C36 C35 0.2(3) . . . . ?
C37 N5 C36 C35 179.81(19) . . . . ?
C34 C35 C36 N5 0.2(3) . . . . ?
C36 N5 C37 C38 -87.9(2) . . . . ?
N6 N5 C37 C38 91.8(2) . . . . ?
N5 C37 C38 C39 -170.60(19) . . . . ?
C37 C38 C39 C40 -172.7(2) . . . . ?
C38 C39 C40 C41 -165.9(2) . . . . ?
C39 C40 C41 C42 73.2(3) . . . . ?
C40 C41 C42 C43 166.2(3) . . . . ?
C41 C42 C43 C44 179.3(3) . . . . ?
C42 C43 C44 C45 -179.5(3) . . . . ?
C43 C44 C45 C46 172.7(3) . . . . ?
C44 C45 C46 C47 -177.7(3) . . . . ?
C45 C46 C47 C48 172.6(4) . . . . ?
N7 N8 C49 C50 -0.4(4) . . . . ?
N8 C49 C50 C51 0.4(4) . . . . ?
C49 C50 C51 C52 0.1(3) . . . . ?
N8 N7 C52 C51 0.4(3) . . . . ?
C53 N7 C52 C51 -175.94(19) . . . . ?
C50 C51 C52 N7 -0.5(3) . . . . ?
C52 N7 C53 C54 86.2(3) . . . . ?
N8 N7 C53 C54 -90.5(3) . . . . ?
N7 C53 C54 C55 176.8(2) . . . . ?
C53 C54 C55 C56 168.0(3) . . . . ?
C54 C55 C56 C57 -178.8(3) . . . . ?
C55 C56 C57 C58 -75.1(4) . . . . ?
C56 C57 C58 C59 177.2(3) . . . . ?
C57 C58 C59 C60 176.4(3) . . . . ?
C58 C59 C60 C61 179.1(3) . . . . ?
C59 C60 C61 C62 177.5(3) . . . . ?
C60 C61 C62 C63 178.9(3) . . . . ?
C61 C62 C63 C64 176.4(3) . . . . ?

#==============================================================================
loop_
_geom_hbond_atom_site_label_D
_geom_hbond_atom_site_label_H
_geom_hbond_atom_site_label_A
_geom_hbond_site_symmetry_D
_geom_hbond_site_symmetry_H
_geom_hbond_site_symmetry_A
_geom_hbond_distance_DA
_geom_hbond_distance_DH
_geom_hbond_distance_HA
_geom_hbond_angle_DHA
_geom_hbond_publ_flag
O15 H66 O17 . . 2_645 2.7396(19) 0.78(3) 1.99(3) 161(3) no
O24 H67 O9 . . 2_645 2.766(2) 0.63(5) 2.20(5) 151(6) no
O29 H68 O25 . . . 2.725(3) 0.840 1.899 167.2 no

#==============================================================================
# Additional structures and associated data_? identifiers
# should be added at this point if there is more than one 
# structure analysis in the CIF.

_shelx_res_file
;

    shelxl.res created by SHELXL-2014/7


TITL CellFormulaUnitsZ
CELL  0.63000 26.18300 15.82800 21.89100 90.000 103.094 90.000
ZERR  4 0.00200 0.00200 0.00200 0.000 0.002 0.000
LATT 1
SYMM    -X, 1/2+Y, 1/2-Z
SFAC C H N O V
DISP C 0.003 0.002 11.182
DISP H -0 0 0.623
DISP N 0.006 0.003 18.982
DISP O 0.011 0.006 31.371
DISP V 0.314 0.528 2116.778
UNIT 264 496 32 120 40
L.S. 10
FMAP 2
PLAN -50
WPDB -2
BOND $H
CONF
LIST 4
TEMP -173.0
ACTA
SIZE 0.005 0.005 0.001
REM HTAB
HTAB
WGHT    0.114400
FVAR       0.16252
V1    5    0.620527    0.707454    0.371521    11.00000    0.01967    0.01362 =
         0.01091    0.00094    0.00378    0.00376
V2    5    0.580335    0.832275    0.457701    11.00000    0.02108    0.01202 =
         0.00723   -0.00020    0.00322   -0.00040
V3    5    0.572689    0.880559    0.318405    11.00000    0.01728    0.00971 =
         0.00796    0.00080    0.00366   -0.00104
V4    5    0.521894    0.662983    0.421511    11.00000    0.02362    0.00877 =
         0.00796    0.00154    0.00507    0.00065
V5    5    0.515568    0.712036    0.274143    11.00000    0.01917    0.00734 =
         0.00710   -0.00026    0.00490    0.00113
V6    5    0.470333    0.835607    0.367795    11.00000    0.01776    0.00714 =
         0.00799   -0.00085    0.00504    0.00007
V7    5    0.465520    0.886013    0.226981    11.00000    0.01831    0.00769 =
         0.00866    0.00126    0.00265   -0.00040
V8    5    0.409923    0.668049    0.329583    11.00000    0.02067    0.00825 =
         0.01172   -0.00083    0.00685   -0.00163
V9    5    0.408482    0.717507    0.183820    11.00000    0.02070    0.00892 =
         0.00994   -0.00192    0.00292   -0.00083
V10   5    0.364700    0.837467    0.269281    11.00000    0.01760    0.01138 =
         0.01395   -0.00099    0.00437    0.00086
O1    4    0.674379    0.659727    0.371142    11.00000    0.02346    0.02243 =
         0.02100    0.00197    0.00562    0.00738
O2    4    0.634643    0.769703    0.444379    11.00000    0.02150    0.01602 =
         0.00995    0.00079    0.00248    0.00261
O3    4    0.603082    0.880121    0.522967    11.00000    0.02714    0.01862 =
         0.00890   -0.00116    0.00314   -0.00259
O4    4    0.624980    0.806800    0.324686    11.00000    0.01664    0.01468 =
         0.01151    0.00168    0.00484    0.00200
O5    4    0.588142    0.913469    0.399843    11.00000    0.02009    0.01149 =
         0.00804   -0.00062    0.00347   -0.00185
O6    4    0.584446    0.627699    0.407212    11.00000    0.02429    0.01124 =
         0.01080    0.00167    0.00538    0.00397
O7    4    0.548443    0.734336    0.482488    11.00000    0.02518    0.01137 =
         0.00814    0.00070    0.00414    0.00033
O8    4    0.574878    0.666120    0.288961    11.00000    0.02173    0.01158 =
         0.01059    0.00001    0.00578    0.00325
O9    4    0.591200    0.961213    0.283040    11.00000    0.02287    0.01335 =
         0.01105    0.00087    0.00563   -0.00259
O10   4    0.536870    0.769196    0.360795    11.00000    0.02021    0.00923 =
         0.00735    0.00028    0.00498    0.00154
O11   4    0.503232    0.874044    0.437181    11.00000    0.02303    0.01050 =
         0.00852   -0.00060    0.00541   -0.00127
O12   4    0.503183    0.582113    0.456053    11.00000    0.03181    0.01142 =
         0.01311    0.00307    0.00725   -0.00019
O13   4    0.530673    0.816208    0.244034    11.00000    0.01866    0.00822 =
         0.00847    0.00090    0.00455    0.00034
O14   4    0.496729    0.911180    0.314209    11.00000    0.01776    0.00685 =
         0.00818   -0.00064    0.00378   -0.00030
O15   4    0.486848    0.626749    0.329680    11.00000    0.02391    0.00636 =
         0.01058   -0.00100    0.00645    0.00089
O16   4    0.454130    0.725974    0.398547    11.00000    0.02187    0.00780 =
         0.00991    0.00013    0.00728   -0.00063
O17   4    0.485139    0.964200    0.190716    11.00000    0.02424    0.01005 =
         0.01208    0.00123    0.00375   -0.00075
O18   4    0.480200    0.666967    0.207912    11.00000    0.02203    0.00971 =
         0.00881   -0.00208    0.00457    0.00074
O19   4    0.444737    0.769529    0.281320    11.00000    0.01840    0.00786 =
         0.01025   -0.00062    0.00508    0.00060
O20   4    0.408245    0.875648    0.353753    11.00000    0.01900    0.00816 =
         0.01413   -0.00135    0.00658    0.00009
O21   4    0.392249    0.587729    0.364533    11.00000    0.02931    0.01167 =
         0.01894    0.00015    0.01051   -0.00403
O22   4    0.438256    0.811708    0.162123    11.00000    0.02174    0.00904 =
         0.00899    0.00029    0.00228    0.00044
O23   4    0.401448    0.918365    0.235723    11.00000    0.01867    0.00935 =
         0.01283    0.00047    0.00283    0.00126
O24   4    0.392848    0.628900    0.243043    11.00000    0.02573    0.00976 =
         0.01331   -0.00266    0.00678   -0.00272
O25   4    0.357143    0.736832    0.319537    11.00000    0.01979    0.01170 =
         0.01703   -0.00216    0.00779   -0.00123
O26   4    0.386963    0.669881    0.118066    11.00000    0.02674    0.01399 =
         0.01415   -0.00383    0.00282   -0.00254
O27   4    0.351056    0.775000    0.198728    11.00000    0.01952    0.01150 =
         0.01504   -0.00155    0.00298   -0.00018
O28   4    0.310159    0.883528    0.269291    11.00000    0.02092    0.01881 =
         0.02321   -0.00368    0.00538    0.00196
O29   4    0.264933    0.697715    0.350727    11.00000    0.03163    0.06079 =
         0.07993    0.00727    0.02755   -0.00385
AFIX 147
H68   2    0.295321    0.710017    0.347129    11.00000   -1.20000
AFIX   0
O30   4    0.303373    0.541488    0.416108    11.00000    0.04864    0.04513 =
         0.06534   -0.00057    0.02157   -0.00963
N1    3    0.586987    0.871415    0.662054    11.00000    0.02103    0.00996 =
         0.01189   -0.00034    0.00651   -0.00029
N2    3    0.576331    0.792985    0.639819    11.00000    0.02577    0.00909 =
         0.01328   -0.00061    0.00805    0.00010
N3    3    0.328109    0.352790    0.409920    11.00000    0.02123    0.02591 =
         0.01549    0.00356    0.00366   -0.00047
N4    3    0.317488    0.343146    0.347135    11.00000    0.02575    0.02938 =
         0.01635    0.00227    0.00046   -0.00420
N5    3    0.303546    0.561901    0.040758    11.00000    0.01863    0.02432 =
         0.01912    0.00439    0.00143   -0.00219
N6    3    0.262887    0.604741    0.006181    11.00000    0.02325    0.04831 =
         0.02721    0.01313    0.00559    0.01001
N7    3    0.338416    0.902398    0.076983    11.00000    0.02250    0.02597 =
         0.01933    0.00364    0.00532    0.00282
N8    3    0.326480    0.833915    0.041526    11.00000    0.03371    0.02556 =
         0.04084    0.00070    0.00148   -0.01235
C1    1    0.530752    0.782744    0.600045    11.00000    0.02626    0.01220 =
         0.01135   -0.00153    0.00808   -0.00242
AFIX  43
H1    2    0.521321    0.727293    0.585034    11.00000   -1.20000
AFIX   0
C2    1    0.495396    0.848176    0.578523    11.00000    0.02240    0.01637 =
         0.01127    0.00050    0.00661   -0.00061
AFIX  43
H2    2    0.464053    0.838257    0.547699    11.00000   -1.20000
AFIX   0
C3    1    0.507435    0.927079    0.603345    11.00000    0.02455    0.01178 =
         0.01773    0.00177    0.00870    0.00223
AFIX  43
H3    2    0.484484    0.973615    0.591103    11.00000   -1.20000
AFIX   0
C4    1    0.554744    0.936222    0.647293    11.00000    0.02494    0.00893 =
         0.01859    0.00007    0.00829    0.00080
AFIX  43
H4    2    0.563886    0.989434    0.666787    11.00000   -1.20000
AFIX   0
C5    1    0.639578    0.882666    0.703704    11.00000    0.02243    0.01649 =
         0.01337    0.00028    0.00419   -0.00010
AFIX  23
H5A   2    0.653827    0.827092    0.720016    11.00000   -1.20000
H5B   2    0.636914    0.918670    0.739832    11.00000   -1.20000
AFIX   0
C6    1    0.676210    0.923775    0.667428    11.00000    0.01994    0.01819 =
         0.01520    0.00099    0.00605    0.00078
AFIX  23
H6A   2    0.665720    0.983440    0.658687    11.00000   -1.20000
H6B   2    0.672693    0.894514    0.626716    11.00000   -1.20000
AFIX   0
C7    1    0.733463    0.920534    0.703394    11.00000    0.02180    0.02556 =
         0.01788    0.00297    0.00352    0.00058
AFIX  23
H7A   2    0.744258    0.860881    0.711487    11.00000   -1.20000
H7B   2    0.737005    0.949076    0.744383    11.00000   -1.20000
AFIX   0
C8    1    0.769571    0.963380    0.666708    11.00000    0.02057    0.03174 =
         0.02672    0.00595    0.00613    0.00105
AFIX  23
H8A   2    0.757954    0.947630    0.621938    11.00000   -1.20000
H8B   2    0.765733    1.025368    0.669718    11.00000   -1.20000
AFIX   0
C9    1    0.827450    0.940685    0.689206    11.00000    0.02114    0.04141 =
         0.03446    0.00701    0.00541    0.00123
AFIX  23
H9A   2    0.831104    0.878417    0.689936    11.00000   -1.20000
H9B   2    0.840154    0.961464    0.732654    11.00000   -1.20000
AFIX   0
C10   1    0.861822    0.977844    0.647969    11.00000    0.02123    0.04409 =
         0.03527    0.00794    0.00632   -0.00031
AFIX  23
H10A  2    0.846501    0.963006    0.603673    11.00000   -1.20000
H10B  2    0.861708    1.040198    0.651491    11.00000   -1.20000
AFIX   0
C11   1    0.918262    0.946501    0.665551    11.00000    0.02015    0.05034 =
         0.04113    0.00803    0.00639   -0.00143
AFIX  23
H11A  2    0.918151    0.883966    0.664636    11.00000   -1.20000
H11B  2    0.934151    0.964359    0.709047    11.00000   -1.20000
AFIX   0
C12   1    0.952319    0.978856    0.622395    11.00000    0.02205    0.04788 =
         0.04000    0.00334    0.00740   -0.00241
AFIX  23
H12A  2    0.954262    1.041245    0.625208    11.00000   -1.20000
H12B  2    0.935484    0.963836    0.578557    11.00000   -1.20000
AFIX   0
C13   1    1.008236    0.942620    0.638543    11.00000    0.02158    0.05328 =
         0.04314    0.00404    0.00684   -0.00417
AFIX  23
H13A  2    1.025203    0.958629    0.682135    11.00000   -1.20000
H13B  2    1.006151    0.880189    0.636686    11.00000   -1.20000
AFIX   0
C14   1    1.042297    0.972666    0.595328    11.00000    0.02372    0.05017 =
         0.04107   -0.00183    0.00838   -0.00856
AFIX  23
H14A  2    1.045352    1.034948    0.598306    11.00000   -1.20000
H14B  2    1.024695    0.958439    0.551586    11.00000   -1.20000
AFIX   0
C15   1    1.097246    0.934590    0.609792    11.00000    0.02146    0.06508 =
         0.05291   -0.00043    0.00737   -0.00449
AFIX  23
H15A  2    1.115314    0.950120    0.653108    11.00000   -1.20000
H15B  2    1.094301    0.872244    0.607827    11.00000   -1.20000
AFIX   0
C16   1    1.130338    0.963700    0.564983    11.00000    0.02754    0.08121 =
         0.05331   -0.01026    0.01255   -0.01282
AFIX 137
H16A  2    1.136227    1.024750    0.569507    11.00000   -1.20000
H16B  2    1.111986    0.950871    0.521787    11.00000   -1.20000
H16C  2    1.164135    0.934248    0.574764    11.00000   -1.20000
AFIX   0
C17   1    0.354674    0.367087    0.319224    11.00000    0.02787    0.01876 =
         0.01298    0.00082    0.00376    0.00038
AFIX  43
H17   2    0.349002    0.359268    0.275171    11.00000   -1.20000
AFIX   0
C18   1    0.402255    0.403533    0.350885    11.00000    0.02530    0.01322 =
         0.01383    0.00211    0.00718   -0.00006
AFIX  43
H18   2    0.427513    0.422077    0.328786    11.00000   -1.20000
AFIX   0
C19   1    0.410928    0.411370    0.414521    11.00000    0.02312    0.01280 =
         0.01408    0.00043    0.00451    0.00077
AFIX  43
H19   2    0.442490    0.435514    0.438127    11.00000   -1.20000
AFIX   0
C20   1    0.372137    0.382922    0.443823    11.00000    0.02244    0.02099 =
         0.01253    0.00080    0.00299    0.00225
AFIX  43
H20   2    0.377561    0.385344    0.488191    11.00000   -1.20000
AFIX   0
C21   1    0.284279    0.329112    0.439960    11.00000    0.02427    0.02970 =
         0.02213   -0.00068    0.00887   -0.00030
AFIX  23
H21A  2    0.253211    0.364529    0.422624    11.00000   -1.20000
H21B  2    0.294890    0.339528    0.485681    11.00000   -1.20000
AFIX   0
C22   1    0.270378    0.236981    0.428122    11.00000    0.02909    0.03152 =
         0.02358   -0.00170    0.00896   -0.00155
AFIX  23
H22A  2    0.302330    0.202092    0.441610    11.00000   -1.20000
H22B  2    0.256575    0.227821    0.382635    11.00000   -1.20000
AFIX   0
C23   1    0.229055    0.209156    0.463981    11.00000    0.02920    0.03628 =
         0.02953    0.00087    0.01008   -0.00519
AFIX  23
H23A  2    0.225862    0.146860    0.461510    11.00000   -1.20000
H23B  2    0.241766    0.224338    0.508723    11.00000   -1.20000
AFIX   0
C24   1    0.174604    0.247661    0.440269    11.00000    0.03126    0.04760 =
         0.02889    0.00033    0.00853   -0.00604
AFIX  23
H24A  2    0.161826    0.234336    0.395204    11.00000   -1.20000
H24B  2    0.176896    0.309874    0.444716    11.00000   -1.20000
AFIX   0
C25   1    0.135519    0.213413    0.477044    11.00000    0.03000    0.05305 =
         0.03619   -0.00070    0.01346   -0.00902
AFIX  23
H25A  2    0.131519    0.151786    0.469793    11.00000   -1.20000
H25B  2    0.150176    0.222297    0.522396    11.00000   -1.20000
AFIX   0
C26   1    0.081725    0.254502    0.459259    11.00000    0.03091    0.05751 =
         0.03471    0.00030    0.00664   -0.00692
AFIX  23
H26A  2    0.066120    0.243033    0.414460    11.00000   -1.20000
H26B  2    0.085755    0.316446    0.464500    11.00000   -1.20000
AFIX   0
C27   1    0.044210    0.222529    0.498889    11.00000    0.02945    0.05485 =
         0.04028   -0.00151    0.01157   -0.01066
AFIX  23
H27A  2    0.038577    0.161158    0.491600    11.00000   -1.20000
H27B  2    0.060902    0.230682    0.543814    11.00000   -1.20000
AFIX   0
C28   1   -0.008459    0.266599    0.484488    11.00000    0.03077    0.06069 =
         0.04020    0.00319    0.00698   -0.00827
AFIX  23
H28A  2   -0.025800    0.256067    0.440051    11.00000   -1.20000
H28B  2   -0.002617    0.328236    0.489645    11.00000   -1.20000
AFIX   0
C29   1   -0.045128    0.238746    0.525451    11.00000    0.02795    0.05284 =
         0.04607    0.00033    0.00896   -0.00477
AFIX  23
H29A  2   -0.027713    0.248493    0.569968    11.00000   -1.20000
H29B  2   -0.051615    0.177318    0.519760    11.00000   -1.20000
AFIX   0
C30   1   -0.097627    0.284978    0.510830    11.00000    0.03275    0.05761 =
         0.05584    0.01095    0.01193   -0.00084
AFIX  23
H30A  2   -0.090744    0.346528    0.513320    11.00000   -1.20000
H30B  2   -0.115832    0.271927    0.467084    11.00000   -1.20000
AFIX   0
C31   1   -0.133971    0.263850    0.553253    11.00000    0.03282    0.05296 =
         0.07072    0.00767    0.01739   -0.00108
AFIX  23
H31A  2   -0.115404    0.274091    0.597303    11.00000   -1.20000
H31B  2   -0.142840    0.203012    0.548961    11.00000   -1.20000
AFIX   0
C32   1   -0.184358    0.314887    0.539101    11.00000    0.03502    0.06180 =
         0.09486    0.00330    0.01739   -0.00063
AFIX 137
H32A  2   -0.204893    0.300355    0.497185    11.00000   -1.20000
H32B  2   -0.175918    0.375283    0.540673    11.00000   -1.20000
H32C  2   -0.204795    0.301975    0.570307    11.00000   -1.20000
AFIX   0
C33   1    0.268965    0.631104   -0.049150    11.00000    0.02911    0.03975 =
         0.02527    0.00939    0.00314    0.01128
AFIX  43
H33   2    0.240713    0.660953   -0.075088    11.00000   -1.20000
AFIX   0
C34   1    0.313945    0.618129   -0.072044    11.00000    0.03259    0.01940 =
         0.01797    0.00206    0.00484    0.00136
AFIX  43
H34   2    0.316589    0.639328   -0.111810    11.00000   -1.20000
AFIX   0
C35   1    0.354060    0.573703   -0.034982    11.00000    0.02479    0.01635 =
         0.02035   -0.00397    0.00466   -0.00030
AFIX  43
H35   2    0.385404    0.562369   -0.048462    11.00000   -1.20000
AFIX   0
C36   1    0.347668    0.545611    0.022956    11.00000    0.02150    0.01295 =
         0.01889   -0.00100    0.00054   -0.00007
AFIX  43
H36   2    0.374903    0.514748    0.049795    11.00000   -1.20000
AFIX   0
C37   1    0.295191    0.532804    0.102066    11.00000    0.02617    0.03585 =
         0.02030    0.00778    0.00424   -0.00515
AFIX  23
H37A  2    0.271084    0.572078    0.116751    11.00000   -1.20000
H37B  2    0.329028    0.532852    0.133401    11.00000   -1.20000
AFIX   0
C38   1    0.272192    0.444635    0.096336    11.00000    0.02238    0.03196 =
         0.03315    0.00897    0.00905    0.00143
AFIX  23
H38A  2    0.298733    0.404032    0.088449    11.00000   -1.20000
H38B  2    0.241708    0.442506    0.060117    11.00000   -1.20000
AFIX   0
C39   1    0.254773    0.418765    0.155880    11.00000    0.02423    0.03932 =
         0.03258    0.01230    0.00521   -0.00244
AFIX  23
H39A  2    0.225004    0.454677    0.160789    11.00000   -1.20000
H39B  2    0.283995    0.427870    0.192832    11.00000   -1.20000
AFIX   0
C40   1    0.238051    0.325188    0.153048    11.00000    0.02750    0.03413 =
         0.05321    0.01272    0.01768    0.00404
AFIX  23
H40A  2    0.215917    0.313492    0.110873    11.00000   -1.20000
H40B  2    0.269850    0.289613    0.158307    11.00000   -1.20000
AFIX   0
C41   1    0.207853    0.298830    0.202184    11.00000    0.03702    0.03867 =
         0.04341    0.01520    0.00335   -0.00791
AFIX  23
H41A  2    0.226736    0.319740    0.243808    11.00000   -1.20000
H41B  2    0.206870    0.236381    0.204181    11.00000   -1.20000
AFIX   0
C42   1    0.151405    0.332926    0.187938    11.00000    0.03456    0.04340 =
         0.04136    0.01366    0.01186   -0.00039
AFIX  23
H42A  2    0.152538    0.394506    0.196059    11.00000   -1.20000
H42B  2    0.135549    0.324352    0.142830    11.00000   -1.20000
AFIX   0
C43   1    0.116445    0.291778    0.226078    11.00000    0.03609    0.04036 =
         0.04123    0.01256    0.00749   -0.00336
AFIX  23
H43A  2    0.132566    0.299732    0.271182    11.00000   -1.20000
H43B  2    0.115009    0.230293    0.217557    11.00000   -1.20000
AFIX   0
C44   1    0.060648    0.326042    0.212711    11.00000    0.03973    0.04696 =
         0.04455    0.01218    0.01592    0.00247
AFIX  23
H44A  2    0.062241    0.387634    0.220796    11.00000   -1.20000
H44B  2    0.044583    0.317717    0.167630    11.00000   -1.20000
AFIX   0
C45   1    0.025350    0.286536    0.250476    11.00000    0.04093    0.04742 =
         0.05256    0.01166    0.01336   -0.00448
AFIX  23
H45A  2    0.019908    0.226427    0.238222    11.00000   -1.20000
H45B  2    0.043446    0.288185    0.295372    11.00000   -1.20000
AFIX   0
C46   1   -0.027260    0.328004    0.242951    11.00000    0.04906    0.05228 =
         0.06210    0.01294    0.02657    0.00169
AFIX  23
H46A  2   -0.045783    0.324351    0.198276    11.00000   -1.20000
H46B  2   -0.021677    0.388639    0.253456    11.00000   -1.20000
AFIX   0
C47   1   -0.062625    0.291385    0.282450    11.00000    0.04239    0.07596 =
         0.07879    0.02144    0.02576    0.00076
AFIX  23
H47A  2   -0.072322    0.233046    0.268060    11.00000   -1.20000
H47B  2   -0.042671    0.288137    0.326578    11.00000   -1.20000
AFIX   0
C48   1   -0.111955    0.341058    0.280065    11.00000    0.06019    0.09430 =
         0.12102    0.02250    0.04916    0.00147
AFIX 137
H48A  2   -0.132474    0.343597    0.236699    11.00000   -1.20000
H48B  2   -0.102857    0.398471    0.295515    11.00000   -1.20000
H48C  2   -0.132700    0.313499    0.306427    11.00000   -1.20000
AFIX   0
C49   1    0.361331    0.812032    0.008978    11.00000    0.05337    0.02426 =
         0.03230   -0.01406   -0.00039   -0.00279
AFIX  43
H49   2    0.354322    0.763141   -0.016733    11.00000   -1.20000
AFIX   0
C50   1    0.407460    0.855925    0.009999    11.00000    0.04029    0.03894 =
         0.01771    0.00373    0.01204    0.01435
AFIX  43
H50   2    0.431162    0.837873   -0.014410    11.00000   -1.20000
AFIX   0
C51   1    0.417556    0.925689    0.047160    11.00000    0.02053    0.02710 =
         0.02337    0.01231    0.00252   -0.00172
AFIX  43
H51   2    0.448494    0.958077    0.049559    11.00000   -1.20000
AFIX   0
C52   1    0.381199    0.947619    0.081210    11.00000    0.02713    0.01237 =
         0.01904   -0.00129   -0.00267   -0.00062
AFIX  43
H52   2    0.387116    0.995686    0.107871    11.00000   -1.20000
AFIX   0
C53   1    0.297220    0.927682    0.109716    11.00000    0.03109    0.06660 =
         0.02833    0.01574    0.01402    0.02110
AFIX  23
H53A  2    0.313565    0.954719    0.150207    11.00000   -1.20000
H53B  2    0.277923    0.877015    0.118551    11.00000   -1.20000
AFIX   0
C54   1    0.259784    0.988294    0.069962    11.00000    0.02549    0.03137 =
         0.02180   -0.00235    0.00128    0.00593
AFIX  23
H54A  2    0.245049    0.962430    0.028541    11.00000   -1.20000
H54B  2    0.278762    1.040295    0.063156    11.00000   -1.20000
AFIX   0
C55   1    0.215552    1.010723    0.101571    11.00000    0.03434    0.06053 =
         0.03484    0.01094    0.00944    0.02044
AFIX  23
H55A  2    0.192416    0.960982    0.100331    11.00000   -1.20000
H55B  2    0.230576    1.024477    0.146139    11.00000   -1.20000
AFIX   0
C56   1    0.183424    1.084226    0.070988    11.00000    0.03588    0.04617 =
         0.04331    0.00496    0.01017    0.01370
AFIX  23
H56A  2    0.167883    1.069944    0.026642    11.00000   -1.20000
H56B  2    0.206756    1.133545    0.071413    11.00000   -1.20000
AFIX   0
C57   1    0.138980    1.108805    0.103558    11.00000    0.03848    0.05198 =
         0.05108    0.00353    0.01330    0.01716
AFIX  23
H57A  2    0.153524    1.110952    0.149400    11.00000   -1.20000
H57B  2    0.126596    1.166297    0.089756    11.00000   -1.20000
AFIX   0
C58   1    0.092465    1.049483    0.090639    11.00000    0.03826    0.05932 =
         0.04698   -0.00049    0.01176    0.01367
AFIX  23
H58A  2    0.104791    0.991396    0.102646    11.00000   -1.20000
H58B  2    0.076483    1.049525    0.045094    11.00000   -1.20000
AFIX   0
C59   1    0.050967    1.073778    0.126157    11.00000    0.03665    0.06299 =
         0.04910    0.00133    0.00849    0.01809
AFIX  23
H59A  2    0.066832    1.070571    0.171666    11.00000   -1.20000
H59B  2    0.040818    1.133331    0.116240    11.00000   -1.20000
AFIX   0
C60   1    0.001910    1.020324    0.112411    11.00000    0.04171    0.06842 =
         0.05446   -0.00740    0.00903    0.01348
AFIX  23
H60A  2    0.011863    0.960578    0.121793    11.00000   -1.20000
H60B  2   -0.014569    1.024319    0.067101    11.00000   -1.20000
AFIX   0
C61   1   -0.038533    1.045803    0.149838    11.00000    0.03678    0.06617 =
         0.06037   -0.00648    0.00284    0.01281
AFIX  23
H61A  2   -0.022244    1.039600    0.195056    11.00000   -1.20000
H61B  2   -0.046982    1.106352    0.141916    11.00000   -1.20000
AFIX   0
C62   1   -0.088655    0.996788    0.135658    11.00000    0.04214    0.06051 =
         0.07323   -0.00668    0.00145    0.00812
AFIX  23
H62A  2   -0.080443    0.936061    0.142962    11.00000   -1.20000
H62B  2   -0.105609    1.003928    0.090710    11.00000   -1.20000
AFIX   0
C63   1   -0.127585    1.023270    0.175057    11.00000    0.03499    0.06285 =
         0.09648   -0.00779    0.00393    0.00164
AFIX  23
H63A  2   -0.111588    1.012626    0.219873    11.00000   -1.20000
H63B  2   -0.134192    1.084724    0.169854    11.00000   -1.20000
AFIX   0
C64   1   -0.178696    0.977445    0.157578    11.00000    0.05235    0.08526 =
         0.11999    0.01160    0.00831   -0.00603
AFIX 137
H64A  2   -0.172538    0.916548    0.162974    11.00000   -1.20000
H64B  2   -0.195453    0.989424    0.113693    11.00000   -1.20000
H64C  2   -0.201627    0.996301    0.184600    11.00000   -1.20000
AFIX   0
C65   1    0.227299    0.710094    0.289474    11.00000    0.03762    0.12225 =
         0.10852    0.02088    0.00119   -0.02113
AFIX  23
H65A  2    0.227356    0.770586    0.277992    11.00000   -1.20000
H65B  2    0.191654    0.696078    0.294588    11.00000   -1.20000
AFIX   0
C66   1    0.239241    0.654371    0.232114    11.00000    0.11556    0.29117 =
         0.18034   -0.16673    0.05922   -0.12096
AFIX 137
H66A  2    0.225945    0.596847    0.234365    11.00000   -1.20000
H66B  2    0.277154    0.652439    0.235212    11.00000   -1.20000
H66C  2    0.221842    0.680155    0.192105    11.00000   -1.20000
AFIX   0
H66   2    0.487715    0.578635    0.322009    11.00000    0.03512
H67   2    0.386873    0.591482    0.234800    11.00000    0.11357
HKLF 4

REM  CellFormulaUnitsZ
REM R1 =  0.0565 for   23922 Fo > 4sig(Fo)  and  0.0842 for all   35308 data
REM   1041 parameters refined using      0 restraints

END

WGHT      0.1144      0.0000

REM Instructions for potential hydrogen bonds
HTAB O29 O25
EQIV $1 -x+1, -y+2, -z+1
HTAB C3 O5_$1
HTAB C3 O11_$1
HTAB C4 O14_$1
HTAB C4 O20_$1
HTAB C4 O23_$1
HTAB C6 O28_$1
HTAB C6 O3
EQIV $2 -x+1, y-1/2, -z+1/2
HTAB C17 O4_$2
HTAB C18 O9_$2
HTAB C18 O17_$2
EQIV $3 -x+1, -y+1, -z+1
HTAB C19 O12_$3
HTAB C20 O6_$3
EQIV $4 x, -y+3/2, z-1/2
HTAB C34 O28_$4
HTAB C35 O20_$4
HTAB C36 O5_$2
HTAB C50 O12_$4
HTAB C50 O16_$4
EQIV $5 -x+1, y+1/2, -z+1/2
HTAB C51 O12_$5
HTAB C52 O6_$5
HTAB C54 O1_$5
HTAB O15 O17_$2
HTAB O24 O9_$2

REM Highest difference peak  1.052,  deepest hole -1.865,  1-sigma level  0.159
Q1    1   0.2237  0.7320  0.1327  11.00000  0.05    1.05
Q2    1   0.2675  0.6277  0.2124  11.00000  0.05    0.98
Q3    1   0.2492  0.7181  0.1267  11.00000  0.05    0.97
Q4    1   0.2973  0.2755  0.4279  11.00000  0.05    0.92
Q5    1   0.2399  0.3209  0.4124  11.00000  0.05    0.87
Q6    1   0.2696  0.5680  0.3873  11.00000  0.05    0.78
Q7    1   0.1911  0.3137  0.2386  11.00000  0.05    0.78
Q8    1   0.3304  0.3143  0.3924  11.00000  0.05    0.70
Q9    1   0.0963  0.3253  0.2478  11.00000  0.05    0.66
Q10   1   0.2508  0.6427  0.3790  11.00000  0.05    0.65
Q11   1   0.0405  0.2882  0.2181  11.00000  0.05    0.59
Q12   1   0.2763  0.7227  0.3902  11.00000  0.05    0.57
Q13   1   0.2385  0.2752  0.2010  11.00000  0.05    0.57
Q14   1   0.4106  0.5705  0.2376  11.00000  0.05    0.55
Q15   1   0.1662  0.9927  0.0784  11.00000  0.05    0.55
Q16   1   0.1288  1.0331  0.1121  11.00000  0.05    0.55
Q17   1   0.1404  0.2941  0.2059  11.00000  0.05    0.55
Q18   1   0.1505  0.3184  0.4351  11.00000  0.05    0.54
Q19   1   0.4405  0.6614  0.1970  11.00000  0.05    0.54
Q20   1   0.2082  0.2685  0.4480  11.00000  0.05    0.53
Q21   1   0.4801  0.7622  0.2701  11.00000  0.05    0.50
Q22   1   0.1986  0.7966  0.1520  11.00000  0.05    0.50
Q23   1   0.5301  0.6563  0.2505  11.00000  0.05    0.48
Q24   1   0.0694  0.9911  0.0931  11.00000  0.05    0.48
Q25   1   0.5104  0.8250  0.2847  11.00000  0.05    0.48
Q26   1   0.3275  0.3084  0.3317  11.00000  0.05    0.47
Q27   1   0.5183  0.9537  0.2795  11.00000  0.05    0.47
Q28   1   0.3025  0.7152  0.0876  11.00000  0.05    0.46
Q29   1   0.2661  0.5432  0.3108  11.00000  0.05    0.46
Q30   1   0.5468  0.6623  0.2856  11.00000  0.05    0.45
Q31   1   0.4734  0.5506  0.2264  11.00000  0.05    0.45
Q32   1   0.5184  0.5725  0.2177  11.00000  0.05    0.44
Q33   1   0.5205  0.9788  0.2396  11.00000  0.05    0.44
Q34   1   0.5724  0.7855  0.2695  11.00000  0.05    0.44
Q35   1   0.5921  0.9487  0.3186  11.00000  0.05    0.43
Q36   1   0.4802  0.9188  0.3113  11.00000  0.05    0.43
Q37   1   0.2709  0.2952  0.5298  11.00000  0.05    0.43
Q38   1   0.5878  0.8053  0.3830  11.00000  0.05    0.43
Q39   1   0.2465  0.3863  0.1294  11.00000  0.05    0.42
Q40   1   0.5148  0.5675  0.3261  11.00000  0.05    0.42
Q41   1   0.5025  0.6497  0.5579  11.00000  0.05    0.42
Q42   1   0.1952  0.2661  0.1682  11.00000  0.05    0.42
Q43   1   0.3317  0.5594  0.3895  11.00000  0.05    0.42
Q44   1   0.4517  0.6530  0.2421  11.00000  0.05    0.42
Q45   1   0.5576  0.6501  0.3299  11.00000  0.05    0.42
Q46   1   0.4904  0.6537  0.2532  11.00000  0.05    0.42
Q47   1   0.5512  0.9894  0.3253  11.00000  0.05    0.41
Q48   1   0.4936  1.0264  0.2719  11.00000  0.05    0.41
Q49   1   0.5124  0.8634  0.3935  11.00000  0.05    0.41
Q50   1   0.5800  0.8162  0.2483  11.00000  0.05    0.41
;

_shelx_res_checksum    9626

_shelx_hkl_file
;
  -1  -1   1   22.28    0.56
   1  -1   1    0.62    0.09
   0   0   2 1464.29   27.67
   2   0   1    0.28    0.22
   2  -1   0  170.85    2.31
  -2  -1   1    9.97    0.28
   1   0   2 1040.34   17.51
  -1  -1   2 3086.72   57.83
   0  -1   2 2107.14   33.96
  -3   0   1    0.06    0.37
   2  -1   1    9.63    0.31
  -2  -1   2 3419.25   49.04
   1  -1   2  379.67    6.17
   1  -2   0 3721.55  120.09
  -3  -1   1    1.06    0.22
   3  -1   0   14.61    0.44
   0  -2   1  267.03    3.37
   2   0   2  274.61    5.08
   3   0   1    0.09    0.28
  -1   0   3   -0.19    0.34
  -1  -2   1  433.27    5.80
   0   0   3    0.19    0.37
   1  -2   1  120.06    2.06
  -2   0   3   -0.41    0.47
  -3  -1   2 2489.15   28.79
   2  -2   0 1562.01   20.91
   2  -1   2   23.65    0.62
   3  -1   1    1.09    0.25
  -2  -2   1  169.97    2.52
  -1  -1   3   80.05    1.46
  -4   0   1   -0.06    0.53
   0  -1   3  110.21    2.06
   1   0   3   -0.09    0.37
   4   0   0  288.28    5.70
  -1  -2   2  690.52    8.44
   0  -2   2  275.82    3.61
  -2  -1   3  119.71    1.87
   2  -2   1    0.97    0.12
  -3   0   3   -0.09    0.81
  -4   0   2  159.78    3.83
  -4  -1   1   16.55    0.50
  -2  -2   2  193.34    2.59
   3   0   2    8.94    0.47
   1  -1   3    0.81    0.34
   1  -2   2  569.34    6.92
   4  -1   0  329.85    5.64
  -3  -2   1   40.26    0.75
   3  -2   0  194.71    2.90
  -3  -1   3  125.60    1.96
   4   0   1    0.90    0.44
  -4  -1   2  852.61   11.87
   2   0   3   -0.03    0.47
   3  -1   2   30.22    0.75
  -1   0   4  735.01   12.53
  -3  -2   2  210.26    2.90
   4  -1   1   88.27    1.62
   2  -2   2   74.59    1.15
  -4   0   3    0.97    1.40
   3  -2   1  435.73    5.52
  -2   0   4  128.91    2.96
  -1  -2   3   51.82    0.90
   2  -1   3   46.65    1.00
   0   0   4  585.01   10.50
   0  -2   3 1080.66   12.84
   0  -3   0    0.34    0.31
  -5   0   1    0.53    0.44
  -2  -2   3  608.01    7.51
  -1  -1   4  411.21    6.01
   1  -3   0    5.52    0.28
   0  -3   1   10.84    0.34
  -4  -1   3   28.20    0.69
   5   0   0  303.74    6.08
  -2  -1   4   28.64    0.78
  -1  -3   1   38.33    0.72
  -5   0   2  100.02    2.80
  -3   0   4    4.14    0.72
   0  -1   4  137.16    2.62
  -4  -2   1  334.21    4.49
   1  -2   3  550.18    8.72
   1   0   4   55.81    1.50
   4   0   2  278.53    5.45
  -5  -1   1    9.19    0.56
   1  -3   1  108.87    1.46
   4  -2   0  126.38    2.03
   3   0   3    0.12    0.47
   2  -3   0   82.82    1.25
  -3  -2   3   80.08    1.31
   5  -1   0   59.11    1.28
  -2  -3   1  277.72    3.65
  -4  -2   2   84.41    1.40
  -5  -1   2   65.31    1.40
  -3  -1   4   29.10    0.72
   3  -2   2 1194.67   15.14
   1  -1   4  943.41   12.40
   4  -1   2  272.86    3.96
  -1  -3   2 1065.02   12.71
   0  -3   2  155.48    2.15
   5   0   1    1.06    0.53
   3  -1   3   59.58    1.12
  -5   0   3    1.28    0.65
   2  -3   1    0.97    0.19
   4  -2   1  664.31    8.29
  -4   0   4   64.81    2.24
   2  -2   3 1265.56   16.11
  -2  -3   2  213.88    2.90
   1  -3   2  536.53    7.10
   2   0   4  427.82    9.44
   5  -1   1   25.71    0.72
  -1  -2   4   33.46    0.75
  -3  -3   1  878.47   10.63
  -5  -1   3  100.74    1.78
   3  -3   0  105.60    1.59
  -4  -2   3   28.29    0.69
  -4  -1   4  264.32    3.86
  -2  -2   4  244.85    3.37
   0  -2   4 2554.24   31.66
   2  -1   4 1159.65   15.21
  -1   0   5    0.56    0.69
  -5  -2   1  344.31    4.71
  -6   0   1    0.12    0.62
  -2   0   5    0.31    0.56
  -3  -3   2  381.20    4.99
  -6   0   2  321.47    6.42
   2  -3   2  456.01    6.64
   4   0   3    0.22    0.59
   5  -2   0  546.59    7.14
   3  -3   1    3.71    0.22
  -1  -3   3    7.29    0.37
  -5  -2   2  263.89    3.74
   0   0   5   -0.19    0.56
  -3  -2   4    3.46    0.37
   6   0   0  616.08   12.93
   5   0   2  645.37   11.59
   0  -3   3   22.09    0.56
   1  -2   4 8048.25  260.18
   4  -2   2  121.27    2.12
  -3   0   5   -0.75    0.65
  -1  -1   5  219.98    3.86
  -6  -1   1    2.56    0.44
  -2  -1   5  167.17    2.52
  -2  -3   3  180.91    2.59
  -5   0   4  480.41   11.75
   3  -2   3  674.44   10.84
  -6  -1   2  113.01    2.62
   4  -1   3  392.51    5.61
   0  -1   5  880.81   11.72
   3   0   4   59.05    1.56
   6  -1   0   41.22    1.09
  -4  -3   1    1.90    0.34
   5  -1   2  317.11    4.52
   1  -3   3   12.25    0.37
  -6   0   3   -0.72    0.81
  -3  -1   5  316.61    5.05
   4  -3   0  423.58    5.48
   1   0   5   -0.16    0.65
   5  -2   1   17.89    0.53
  -5  -1   4  613.77    8.13
  -5  -2   3 1174.11   14.18
  -3  -3   3  210.26    2.93
  -4  -2   4  113.95    1.81
   6   0   1    0.06    0.44
  -4  -3   2  510.73    6.67
  -4   0   5   -0.28    0.78
   3  -1   4  123.73    2.06
   3  -3   2   15.02    0.37
   0  -4   0 1250.23   24.43
   2  -2   4 2383.55   30.16
  -6  -1   3   -0.16    0.37
   1  -1   5   69.61    1.37
   4  -3   1  627.08    7.91
   0  -4   1   33.43    0.72
   6  -1   1  495.65    6.98
  -1  -4   1 2443.34   30.57
   2  -3   3    0.81    0.22
  -4  -1   5  212.69    3.21
  -1  -2   5 1503.96   18.07
   1  -4   1 4686.37   67.02
  -6  -2   1    4.24    0.41
  -2  -2   5   93.45    1.56
  -1  -3   4  800.63    9.82
   2   0   5    0.09    0.75
   2  -4   0  213.53    2.93
  -6  -2   2  407.34    5.83
  -4  -3   3   10.81    0.47
   4  -2   3   58.27    1.22
  -6   0   4  487.89   10.44
  -2  -4   1  932.94   12.06
  -2  -3   4  247.34    3.37
   5   0   3    0.31    0.62
   0  -2   5 1528.98   21.03
   0  -3   4  136.10    2.03
   6  -2   0   17.76    0.65
   5  -2   2  241.83    3.86
  -7   0   1   -0.06    0.65
  -3  -2   5    0.47    0.44
  -5  -3   1  680.48    8.69
  -7   0   2    4.30    0.69
  -1  -4   2  171.66    2.49
  -5   0   5   -1.03    0.93
   0  -4   2  411.30    5.39
  -5  -2   4  185.99    2.74
   4   0   4   99.71    2.40
   2  -1   5 1329.87   17.32
   2  -4   1   67.80    1.25
   6   0   2   10.84    0.69
   5  -3   0   10.25    0.44
  -6  -1   4  453.96    6.29
   5  -1   3    4.11    0.44
  -5  -3   2    6.82    0.47
  -3  -3   4  145.67    2.21
   3  -2   4   34.87    0.87
  -2   0   6  714.39   12.34
   7   0   0    2.09    0.72
  -2  -4   2  867.56   10.66
  -7  -1   1  353.41    5.48
  -1   0   6    2.52    0.59
   1  -4   2    5.89    0.25
   1  -3   4   26.08    0.72
   4  -3   2    1.59    0.25
  -6  -2   3 1307.19   15.83
  -7  -1   2   33.06    0.97
  -5  -1   5  343.87    4.92
   1  -2   5  433.77    8.35
   3  -3   3   33.25    0.72
   4  -1   4  302.15    4.18
  -3  -4   1  126.66    1.93
  -7   0   3   -0.28    0.62
   3  -4   0   12.49    0.37
  -3   0   6 3798.33   70.23
   6  -1   2   31.41    0.75
   6  -2   1  317.64    5.61
  -4  -2   5   47.80    1.00
   0   0   6    2.68    0.72
  -2  -1   6   28.95    0.81
   7  -1   0   50.63    1.18
  -1  -1   6    0.34    0.56
   5  -3   1   31.35    0.69
   3   0   5    0.16    0.56
  -3  -4   2   41.10    0.87
  -7  -1   3   15.70    0.81
  -5  -3   3   93.20    1.59
  -3  -1   6    8.38    0.53
   2  -4   2 1474.14   25.39
  -4  -3   4  110.33    1.81
   3  -4   1  520.17    6.92
  -1  -4   3 1287.93   15.61
   0  -1   6   30.38    0.90
   7   0   1    0.72    0.62
   0  -4   3    1.50    0.34
  -4   0   6 7008.56  127.13
   2  -3   4  102.95    1.65
  -2  -4   3 1815.52   21.22
   3  -1   5  627.76    8.88
  -6   0   5    0.19    1.03
   2  -2   5    6.82    0.59
   1   0   6   54.25    1.68
  -6  -2   4  128.53    2.06
   5  -2   3  182.90    3.40
  -7   0   4  426.97    9.72
  -4  -4   1    5.48    0.37
   7  -1   1 1505.39   19.63
  -7  -2   1  513.32    7.38
   1  -4   3  829.36   10.06
  -4  -1   6  149.44    2.40
  -1  -3   5  244.94    3.61
  -7  -2   2   47.67    1.06
   4  -4   0   65.31    1.12
  -6  -3   1   74.47    1.34
  -5  -2   5   45.77    1.00
  -2  -3   5   65.09    1.22
   4  -2   4  167.14    3.15
  -6  -1   5  283.58    4.46
   1  -1   6    0.37    0.56
  -3  -4   3 1126.56   14.68
  -6  -3   2  119.65    1.96
   6  -2   2  629.29   10.19
   6   0   3   -0.37    0.56
   5   0   4  240.92    4.77
   4  -3   3    0.22    0.28
  -4  -4   2    4.67    0.41
   0  -3   5  120.65    1.96
  -7  -1   4    5.64    0.50
   6  -3   0  405.69    5.61
  -2  -2   6  203.81    3.24
   7  -2   0  303.68    5.70
   5  -3   2  122.24    1.96
   3  -4   2   55.93    1.59
  -1  -2   6  166.33    2.93
  -3  -3   5   91.02    1.53
  -5   0   6 9999.00  312.06
  -5  -3   4    7.70    0.47
  -7  -2   3  102.86    1.71
  -8   0   2   62.04    2.15
  -8   0   1   -0.34    0.69
  -3  -2   6  813.32   11.03
   4  -4   1   15.11    0.41
   6  -1   3  221.67    3.52
   5  -1   4  464.93    6.70
   2  -4   3  208.74    3.49
   3  -3   4  539.61    6.89
   0  -2   6  227.37    3.52
   2   0   6  530.11    9.78
   7   0   2  870.56   15.74
  -6  -3   3   24.62    0.75
   4   0   5   -0.44    0.62
   1  -3   5  305.58    4.21
  -5  -1   6  401.83    6.26
  -1  -4   4   24.27    0.65
   3  -2   5 6696.57   96.06
  -8  -1   2  228.80    3.71
  -8  -1   1 1381.25   17.26
  -8   0   3    0.62    0.62
  -4  -4   3  513.72    6.70
   8   0   0 1063.31   19.75
   6  -3   1 1618.00   19.32
  -2  -4   4  849.52   10.56
  -4  -3   5  432.58    5.70
   0  -4   4  105.19    1.74
   2  -1   6  223.04    3.43
   7  -2   1  277.81    4.83
  -4  -2   6  901.59   12.03
   0  -5   0    0.06    0.44
   7  -1   2  364.06    5.08
   4  -1   5  368.77    5.08
  -5  -4   1  113.82    1.81
  -7   0   5    0.25    1.34
  -6  -2   5   44.06    1.00
   1  -5   0    5.52    0.34
   1  -2   6    0.37    0.56
   0  -5   1  132.49    1.96
  -8  -1   3  160.10    3.08
  -2   0   7   -0.78    0.72
   5  -4   0    3.43    0.34
   8  -1   0    5.80    0.47
  -1  -5   1  420.43    5.45
  -5  -4   2  153.43    2.34
  -3  -4   4  763.46    9.66
  -7  -2   4    6.64    0.53
  -1   0   7    0.50    0.78
   1  -4   4   26.64    0.65
   4  -4   2  180.57    2.52
  -3   0   7    0.06    0.75
   1  -5   1  131.12    1.96
  -6   0   6 7608.63  170.75
   3  -4   3    5.08    0.25
  -7  -1   5  119.28    2.06
   2  -3   5  249.80    3.55
   2  -5   0  228.80    3.18
   6  -2   3   14.08    0.56
  -2  -1   7    2.37    0.59
   5  -2   4   27.30    0.78
  -6  -3   4    0.34    0.47
  -2  -5   1  254.94    3.46
   5  -3   3  105.69    1.78
  -8   0   4   89.40    2.62
   8   0   1   -0.87    0.62
  -1  -1   7    1.78    0.56
  -7  -3   1  391.42    5.48
   0   0   7   -0.28    0.75
   3   0   6 1374.93   24.21
  -3  -1   7    0.47    0.56
  -7  -3   2   57.18    1.22
  -1  -5   2 1400.92   17.98
  -5  -3   5  119.28    1.96
  -6  -1   6   68.24    1.40
   0  -5   2 2009.83   23.59
  -5  -2   6 1767.94   21.00
   5  -4   1  633.68    8.04
  -4   0   7    0.65    0.81
   4  -3   4 1484.23   19.54
  -5  -4   3  120.77    1.96
   2  -5   1   12.06    0.34
  -8  -2   2  188.26    3.02
  -8  -2   1 1694.78   26.52
   6  -3   2  594.14    7.76
  -4  -4   4  114.91    1.84
   6   0   4   16.11    0.90
  -8  -1   4  276.16    4.89
  -2  -3   6  473.21    6.26
   8  -1   1  889.47   12.59
   7  -3   0  405.94    5.55
   2  -2   6    4.33    0.69
  -2  -5   2 1154.66   13.93
  -1  -3   6  455.39    6.20
   7  -2   2  451.28    6.95
   0  -1   7  131.83    2.31
   1  -5   2   50.60    0.93
   2  -4   4    3.68    0.31
   3  -1   6  514.19    7.04
   4  -2   5 3010.78   37.24
   7   0   3    0.00    0.53
  -4  -1   7    7.32    0.62
  -3  -5   1  140.68    2.12
  -7  -3   3    2.90    0.44
   3  -5   0   28.98    0.62
  -3  -3   6   15.24    0.62
  -8  -2   3    0.59    0.47
   5   0   5    0.28    0.65
   8  -2   0   81.98    1.87
   6  -1   4  399.06    5.58
   0  -3   6   57.27    1.18
   1   0   7   -0.44    0.93
  -1  -4   5  415.01    5.52
  -6  -4   1  164.55    2.56
   7  -1   3   25.83    0.75
  -2  -4   5    2.43    0.44
  -5   0   7   -0.75    0.84
  -7  -2   5   58.86    1.22
   3  -3   5   29.51    0.87
  -3  -5   2 1184.83   14.40
  -6  -4   2  428.10    5.76
   2  -5   2   41.35    0.87
  -2  -2   7  134.33    2.34
   5  -1   5  331.38    4.58
   4  -4   3  316.86    4.14
   3  -5   1    4.77    0.37
  -9   0   2    0.06    0.59
  -1  -5   3  156.04    2.37
   0  -4   5   69.30    1.31
   1  -1   7  534.88    7.20
   6  -4   0   27.05    0.69
  -9   0   1    0.34    0.72
   7  -3   1 1263.91   15.83
   5  -4   2  209.76    3.24
  -1  -2   7  151.15    2.62
  -7   0   6 2690.53   63.50
   0  -5   3  105.75    1.68
  -4  -3   6   10.59    0.56
  -8   0   5   -0.84    0.84
  -3  -2   7    0.59    0.56
  -3  -4   5 1093.19   13.18
  -6  -2   6 2186.62   25.68
   8   0   2  187.73    4.21
  -2  -5   3   64.97    1.28
  -5  -4   4   17.98    0.69
  -5  -1   7   47.86    1.09
  -6  -3   5    0.53    0.53
   1  -3   6 1100.14   13.71
  -9   0   3    0.09    0.62
  -9  -1   2  178.76    3.08
   3  -4   4   38.61    0.81
  -8  -2   4  105.04    1.90
  -7  -3   4   47.11    1.06
  -9  -1   1  678.12    8.88
   8  -2   1   24.68    0.87
  -4  -5   1   39.48    0.81
  -7  -1   6   11.65    0.75
   1  -5   3   11.59    0.37
   0  -2   7   40.88    1.09
   4   0   6  325.15    6.54
   3  -2   6  622.47    8.57
  -6  -4   3   19.79    0.69
  -8  -1   5   19.54    0.81
   4  -5   0  254.54    3.49
   8  -1   2  432.15    5.92
   9   0   0 1344.21   24.62
   1  -4   5  174.27    2.68
  -4  -2   7    2.87    0.65
   2   0   7   -0.28    0.90
  -9  -1   3   40.94    1.09
  -3  -5   3    0.47    0.41
   6  -3   3  874.82   11.87
   5  -3   4 1597.16   22.34
   6  -4   1 1051.12   13.12
   6  -2   4    0.75    0.47
  -4  -5   2   93.04    1.53
  -4  -4   5 2071.65   24.49
   3  -5   2  105.22    2.62
   4  -1   6  272.36    3.99
  -6   0   7    1.15    1.00
   9  -1   0   14.80    0.69
  -5  -3   6   11.65    0.69
   7  -2   3  377.84    5.64
   2  -1   7  560.99    7.63
  -9   0   4  121.24    3.15
  -8  -3   2    0.34    0.44
  -8  -3   1  733.02    9.57
   4  -5   1  135.14    1.93
   5  -2   5  902.74   12.28
   2  -5   3    0.97    0.37
   1  -2   7    0.09    0.62
   2  -3   6  619.19    9.57
   7  -3   2  803.31   11.25
  -6  -1   7    3.46    0.69
   4  -3   5    0.65    0.47
  -5  -2   7    8.66    0.72
  -1  -5   4   82.73    1.46
   2  -4   5  839.49   10.59
  -2   0   8    1.40    0.93
  -9  -1   4   97.87    2.21
   7   0   4  225.44    4.83
  -8  -3   3    0.22    0.47
  -4  -5   3   64.59    1.25
   9   0   1    0.53    0.62
  -9  -2   2   17.08    0.81
   8  -3   0  478.79    6.61
  -6  -4   4   10.59    0.53
  -2  -5   4   22.43    0.69
   5  -4   3  473.09    6.17
  -3   0   8  139.16    3.24
   0  -5   4   32.78    0.78
  -9  -2   1 2509.25   37.64
   6   0   5   -0.06    0.78
  -7  -2   6 1110.57   13.74
  -7  -4   1    0.69    0.47
  -1   0   8    4.39    1.03
  -8  -2   5    7.45    0.62
  -5  -5   1  152.31    2.34
  -7  -4   2   88.80    1.56
  -5  -4   5 1444.82   17.48
   8  -2   2   77.56    1.56
   4  -4   4    5.70    0.37
  -7  -3   5    2.84    0.56
  -2  -1   8    5.61    0.69
  -8   0   6  510.14   14.05
  -9  -2   3   12.00    0.65
   7  -1   4  141.37    2.40
   6  -4   2  587.97    7.70
  -2  -3   7  132.15    2.21
   8   0   3    0.78    0.69
   5  -5   0  211.88    2.96
   9  -1   1  557.13    7.79
  -3  -1   8   14.12    0.65
  -5  -5   2   15.02    0.59
  -4   0   8  606.17   11.22
  -3  -5   4  775.55   10.00
   3   0   7    0.00    0.81
  -2  -4   6    0.06    0.47
   7  -4   0  156.82    2.49
   6  -1   5   10.22    0.62
  -1  -3   7  424.29    5.64
  -1  -4   6    0.65    0.47
  -1  -1   8    1.87    0.72
   4  -2   6  305.70    4.71
   1  -5   4   77.99    1.37
   4  -5   2   25.43    0.53
  -3  -3   7    0.87    0.47
  -6  -3   6   31.10    0.90
   9  -2   0   35.24    1.06
   0   0   8  239.12    4.95
   3  -5   3   22.22    0.62
  -7  -4   3   16.05    0.59
   2  -2   7    1.06    0.62
  -8  -1   6   71.26    1.50
  -3  -4   6   85.78    1.53
  -9   0   5   -0.25    0.90
   8  -1   3    3.65    0.53
  -7   0   7    0.06    1.15
   5   0   6    3.24    0.75
  -4  -1   8    6.82    0.75
  -8  -3   4    1.50    0.50
   0  -4   6  116.16    1.96
   3  -1   7 1442.26   17.92
   8  -3   1  392.23    5.48
   0  -6   0  248.49    4.99
   0  -3   7   21.19    0.75
   3  -3   6  247.03    4.02
  -6  -2   7  130.18    2.12
   5  -5   1  137.91    2.06
   0  -1   8    0.06    0.59
  -4  -3   7    0.37    0.53
   3  -4   5  839.58   10.84
   1  -6   0  218.89    3.21
  -5  -5   3   95.53    1.65
  -9  -2   4   94.35    1.84
  -5   0   8  364.56    7.95
 -10   0   2   69.14    2.06
   0  -6   1 2060.71   25.89
  -9  -1   5   43.00    1.15
  -4  -5   4 1764.95   21.19
  -7  -1   7   73.57    1.56
   6  -3   4 1563.19   20.35
  -1  -6   1   39.17    0.87
   5  -1   6  116.66    1.99
   7  -4   1  412.36    5.70
 -10   0   1    0.72    0.69
  -4  -4   6  459.44    6.04
   2  -5   4   80.48    1.31
   1  -6   1 1790.40   22.93
   9   0   2    6.36    0.87
 -10   0   3   -0.56    0.84
   7  -3   3  602.99    8.44
   1   0   8 2319.80   39.98
  -6  -4   5  921.16   11.56
  -2  -2   8   62.32    1.37
   1  -4   6   75.09    1.56
   7  -2   4   65.96    1.40
   2  -6   0   71.60    1.25
  -5  -1   8  125.51    2.12
 -10  -1   2    9.53    0.65
   5  -3   5    6.76    0.56
   9  -2   1    0.53    0.47
  -2  -6   1  220.79    3.18
  -3  -2   8   18.57    0.75
  -7  -4   4   -0.19    0.56
   1  -3   7  914.96   13.59
   6  -2   5  276.35    4.27
  -1  -2   8   28.32    0.93
 -10  -1   1   91.39    1.78
  -1  -5   5  163.90    2.52
   9  -1   2  110.68    2.09
  -6  -5   1   60.32    1.15
  -1  -6   2  133.64    2.09
   0  -6   2  250.27    3.49
 -10  -1   3    3.02    0.56
  -2  -5   5  116.66    1.87
   1  -1   8  278.91    4.05
  -5  -3   7    1.68    0.53
  -8  -2   6  351.85    5.02
   2  -6   1   74.75    1.40
  10   0   0  516.62   10.34
  -6  -5   2   37.17    0.84
   6  -4   3    0.37    0.34
   5  -4   4  150.62    2.43
   8  -2   3  211.13    3.40
   4  -5   3  189.48    3.24
  -9  -3   2  876.63   11.37
  -4  -2   8    2.99    0.69
   0  -5   5  111.89    1.84
   3  -2   7    5.14    0.69
   6  -5   0   24.15    0.65
  -9  -3   1  824.19   10.97
  -2  -6   2    4.46    0.44
   5  -5   2   20.28    0.50
  -7  -3   6   10.78    0.65
 -10   0   4  177.89    4.86
   1  -6   2  100.24    1.59
   4   0   7    0.87    0.97
  -8  -3   5   45.12    1.03
  -3  -5   5  218.89    3.21
  -6   0   8   31.88    1.40
   8  -3   2  452.65    7.51
  -5  -4   6  959.27   12.03
   0  -2   8   24.77    1.00
  -5  -5   4 1273.13   15.74
  -3  -6   1  194.56    2.74
   3  -6   0   49.20    0.97
  -8  -4   2   15.21    0.62
  10  -1   0    1.87    0.59
  -9  -3   3  101.58    1.78
  -8  -4   1  357.05    5.05
  -9  -2   5   32.13    0.93
  -7  -2   7   82.14    1.56
   5  -2   6  126.54    2.21
  -9   0   6    1.56    0.93
   3  -5   4   25.61    0.87
   2  -4   6   11.00    0.59
   7   0   5   -0.12    0.65
  -8   0   7    1.03    0.81
 -10  -1   4    5.39    0.62
   7  -4   2  358.92    5.14
   4  -1   7  920.60   11.75
   4  -3   6   15.74    0.75
  -6  -5   3    5.08    0.53
   4  -4   5  253.88    3.74
  -6  -1   8  178.17    2.80
   2   0   8  753.15   13.71
   8   0   4  112.45    2.84
   9  -3   0 1239.29   15.61
   1  -5   5    8.85    0.47
  -3  -6   2   46.61    1.00
   2  -3   7 3680.74   50.04
  -5  -2   8  177.02    2.84
 -10  -2   2   31.22    1.25
   2  -6   2   16.11    0.56
  -8  -4   3   59.36    1.18
   3  -6   1  113.67    2.15
   8  -4   0   22.84    0.72
   6  -5   1   18.79    0.56
  -1  -6   3   44.03    0.93
  -4  -5   5  283.05    4.02
  -9  -1   6   29.91    1.00
   7  -1   5    3.99    0.56
   0  -6   3  392.48    5.27
  -8  -1   7   12.46    0.75
 -10  -2   1 3038.11   51.35
  -6  -3   7    1.93    0.53
   2  -1   8    0.50    0.62
   8  -1   4   12.18    0.59
  10   0   1    0.03    0.75
   9  -2   2    0.19    0.50
 -10  -2   3    2.31    0.56
   6   0   6    0.28    0.81
  -2  -6   3  165.61    2.62
   1  -2   8  411.14    6.23
  -7  -4   5  351.60    5.02
  -9  -3   4    8.94    0.62
  -2  -4   7   98.21    1.71
   9   0   3    0.12    0.84
 -10   0   5    0.97    0.97
  -4  -6   1   66.71    1.22
  -1  -4   7  375.56    5.20
   1  -6   3  295.79    4.05
  -3  -4   7    3.80    0.53
  10  -1   1 1087.64   14.40
   4  -6   0    1.84    0.37
  -6  -4   6 1311.52   16.20
   6  -1   6   40.35    1.09
   2  -5   5  201.72    2.90
  -2   0   9    0.09    0.78
  -7   0   8    3.65    0.87
  -3   0   9   -0.28    0.97
  -2  -3   8  117.53    2.06
  10  -2   0  367.02    5.73
   7  -3   4  844.91   11.84
  -3  -6   3  894.52   11.34
   9  -3   1  361.91    6.79
  -6  -5   4  122.86    2.06
  -4  -6   2   68.27    1.28
   5  -5   3  216.03    3.30
  -3  -3   8   20.07    0.78
  -8  -4   4  142.30    2.27
   9  -1   3    8.38    0.56
 -10  -1   5  134.30    2.56
   8  -4   1    8.01    0.50
   6  -3   5    1.03    0.56
   3  -6   2   43.75    0.93
  -7  -5   1    3.18    0.47
  -1  -3   8   89.08    1.74
 -10  -2   4   24.74    0.87
   0  -4   7   77.65    1.46
   4  -2   7   90.27    1.81
   3  -4   6  220.89    3.37
  -6  -2   8  370.98    5.52
  -1   0   9   -0.34    0.90
  -7  -5   2  216.99    3.18
  -5  -5   5  164.80    2.59
  -4   0   9   -0.44    1.00
  -4  -4   7   74.94    1.37
   4  -5   4    0.28    0.19
  -2  -1   9   73.82    1.59
  -7  -1   8    2.87    0.72
  -3  -1   9   41.35    1.15
  -8  -3   6    0.75    0.59
   4  -6   1    0.47    0.41
   6  -5   2  112.14    1.81
   8  -3   3   47.27    1.18
   6  -4   4  104.07    1.81
   3   0   8 3083.60   51.91
  -4  -3   8    3.58    0.62
   2  -6   3   16.08    0.41
  -9  -2   6   66.49    1.43
   3  -3   7 4421.48   55.31
  -2  -5   6   13.71    0.62
   7  -5   0   20.22    0.62
   5   0   7    0.31    0.78
   7  -2   5   59.98    1.28
  -8  -2   7   31.07    0.90
  -1  -5   6    5.05    0.50
  -1  -1   9   14.27    0.87
   2  -2   8  781.78   11.03
   8  -2   4    9.38    0.62
   7  -4   3  315.14    4.80
 -11   0   2  267.22    5.61
   0  -3   8  107.03    2.37
  -4  -1   9   16.92    0.87
  -1  -6   4  112.48    1.90
  -7  -5   3  104.45    1.81
  -3  -5   6  379.36    5.36
  -9  -3   5  957.46   12.31
  -4  -6   3  608.26    8.01
   5  -4   5   11.53    0.56
   0   0   9    0.19    0.93
  -7  -3   7    3.02    0.69
 -11   0   3    0.12    0.78
  -2  -6   4  580.65    7.67
   5  -3   6   43.40    1.15
   3  -1   8    5.98    0.69
   0  -6   4   90.33    1.65
   0  -5   6    6.98    0.50
   1  -4   7    0.19    0.50
 -11   0   1    0.78    0.72
  -5   0   9    0.84    1.06
  10   0   2    0.12    0.97
   5  -1   7  123.36    2.09
  -9   0   7   -1.40    1.03
  -5  -6   1    0.31    0.41
  10  -2   1   25.46    0.87
   6  -2   6  151.59    2.56
 -11  -1   2   17.67    0.75
  -5  -4   7  510.92    6.70
   3  -5   5  384.16    5.23
  -5  -3   8    1.81    0.69
 -10  -3   2  759.88   10.19
   5  -6   0   17.17    0.53
   0  -1   9    4.64    0.69
  -9  -4   2  205.62    3.12
 -11  -1   3    7.98    0.62
  -5  -6   2   29.26    0.78
  -3  -6   4 1224.55   15.14
   9  -2   3    1.28    0.47
 -10   0   6   20.69    1.50
 -10  -2   5   31.94    1.00
 -11  -1   1  148.60    2.52
  -5  -1   9   26.98    1.00
  -9  -4   1 1923.08   23.56
   7  -5   1    0.16    0.37
  10  -1   2  165.11    2.77
  -7  -4   6  954.22   12.31
 -10  -3   1  577.44    8.16
  -4  -5   6 1319.40   16.08
   1  -6   4   14.68    0.47
   4  -6   2  265.48    4.21
  -9  -1   7  478.88    7.23
  -8  -4   5    0.47    0.56
   9  -3   2   42.66    1.18
   8  -4   2   33.96    0.90
 -10  -3   3    3.99    0.65
 -11   0   4  112.73    3.15
   3  -6   3  125.26    3.24
   1  -3   8 1327.07   17.89
  -6  -5   5   80.02    1.50
  -2  -2   9   39.67    1.09
  -7  -2   8  173.09    2.84
  -3  -2   9    0.41    0.65
   1  -5   6   42.35    1.00
  -9  -4   3   89.77    1.71
  -8   0   8  149.78    4.95
  11   0   0 1458.81   26.98
   8   0   5    0.53    0.81
 -10  -1   6   40.91    1.25
  -7  -5   4   15.39    0.72
   1   0   9    0.72    0.90
   4  -4   6  918.01   12.15
  -1  -2   9   23.12    0.97
   9  -4   0  236.53    3.77
   5  -6   1  150.00    2.18
  -6   0   9   -0.81    0.87
 -11  -1   4   44.46    1.28
  -4  -2   9   14.46    0.75
  -5  -6   3   95.50    1.71
   2  -4   7  703.64    9.41
   7   0   6    1.56    0.84
  10  -3   0 1196.48   16.55
   9   0   4   12.25    0.97
  -8  -1   8    1.90    0.65
   6  -5   3   23.77    0.62
  11  -1   0  107.47    2.06
   5  -5   4    0.25    0.28
  -4  -6   4 1358.20   16.79
   3  -2   8  821.42   11.37
   8  -1   5   21.22    0.81
   1  -1   9   30.01    0.93
   5  -2   7   82.45    1.56
 -10  -3   4   79.80    1.62
   4  -3   7 2187.65   26.49
   2  -6   4   76.68    1.56
  -6  -4   7  277.07    3.96
   4   0   8  116.54    2.93
  -6  -3   8  157.45    2.59
  -5  -5   6 2243.24   26.67
 -11  -2   2   85.06    1.87
  -6  -1   9   87.87    1.65
   7  -1   6   48.30    1.18
  -9  -4   4  196.05    3.08
  -8  -5   2  135.29    2.27
   9  -1   4    3.43    0.56
  -8  -5   1    8.19    0.56
   0  -2   9  139.69    2.56
 -11  -2   3 1088.54   19.85
  -9  -3   6   30.69    0.93
 -11  -2   1 1797.13   26.08
  -5  -2   9   45.27    1.37
   2  -5   6  145.20    2.34
  10  -2   2    0.31    0.56
 -11   0   5   -0.28    0.97
   7  -3   5   36.49    1.12
  -8  -3   7    7.35    0.65
   0  -7   0    0.16    0.62
   7  -5   2  139.62    2.27
  -9  -2   7    1.90    0.62
   4  -1   8   48.45    1.22
   4  -5   5  123.95    2.03
  -1  -6   5    4.86    0.56
   2  -3   8 2645.85   33.56
   8  -3   4  222.88    3.93
  -6  -6   1  118.50    1.93
  -2  -6   5  473.77    6.79
   1  -7   0   12.15    0.53
  11   0   1   -0.59    0.78
  -2  -4   8   -0.50    0.56
   7  -4   4   21.41    0.69
   0  -7   1    6.61    0.47
  -6  -6   2    0.12    0.50
  -8  -5   3    1.84    0.50
   4  -6   3   13.90    1.09
   9  -4   1  120.09    2.12
   6   0   7    0.31    0.78
   8  -5   0  219.02    3.33
  -3  -4   8  111.52    1.96
  -1  -7   1  122.64    2.03
  10   0   3    1.28    0.90
   0  -6   5  109.18    1.84
 -10  -2   6  259.96    3.93
   6  -6   0    7.32    0.44
 -11  -1   5   12.78    0.87
   6  -4   5   13.68    0.62
   5  -6   2   10.94    0.56
   2   0   9   -0.28    0.97
  -1  -4   8   53.66    1.22
  -3  -6   5 1900.68   22.65
   1  -7   1   21.47    0.62
  10  -3   1  190.23    3.37
   6  -3   6    4.67    0.65
 -11  -2   4  144.17    2.68
  -5  -6   4  775.58   10.00
  -7  -5   5    3.05    0.59
  -7   0   9   -1.50    1.00
  11  -1   1   10.56    0.72
  -8  -4   6  184.12    2.99
   2  -7   0  118.12    1.99
  -8  -2   8  269.81    3.93
  11  -2   0  183.37    3.27
  -2  -5   7  160.28    2.62
   8  -4   3  468.98    6.54
   6  -1   7   23.15    0.84
  -2  -7   1  220.82    3.21
  10  -1   3   93.66    1.71
  -4  -4   8  185.52    2.99
   8  -2   5    2.24    0.56
   3  -6   4  152.65    2.68
   9  -3   3    0.75    0.78
   3  -4   7  325.27    4.77
 -10  -3   5  340.85    4.92
   1  -2   9 1191.34   16.02
 -10   0   7   -1.25    1.28
  -1  -5   7  284.89    4.27
   2  -1   9  333.43    4.83
  -6  -6   3    5.48    0.53
  -3  -5   7    2.96    0.56
  -1  -7   2    7.95    0.50
  -6  -5   6 2086.14   25.02
   0  -7   2   14.93    0.56
   1  -6   5    8.72    0.44
  -6  -2   9  123.17    2.34
   0  -4   8   37.42    1.06
  -7  -1   9  197.67    2.96
  -2  -3   9   10.16    0.87
  -9   0   8  103.92    2.68
  -7  -3   8  452.21    6.23
  -3  -3   9   18.54    0.90
   7  -2   6   62.32    1.37
   2  -7   1  196.46    2.90
   9  -2   4   48.80    1.22
  -9  -4   5  461.09    6.42
  -7  -4   7    1.12    0.53
   6  -6   1   39.14    0.81
   5  -4   6  259.68    4.02
  -4  -6   5 3721.02   43.40
  -8  -5   4    8.91    0.62
   8  -5   1  191.16    3.02
 -10  -1   7    9.38    0.75
  -2  -7   2   13.68    0.59
   0  -5   7   86.93    1.62
   1  -7   2  307.04    4.24
   3  -5   6  140.28    2.31
   4  -2   8  761.44   10.10
  -1  -3   9    4.80    0.72
  -4  -3   9    1.40    0.65
  -3   0  10   40.32    1.59
  -4  -5   7  305.98    4.42
  -3  -7   1    3.24    0.47
  -9  -1   8  162.74    3.05
   3  -7   0  164.40    2.49
  -2   0  10   74.50    2.27
  -5  -4   8  133.30    2.24
 -10  -4   2 1142.20   15.21
 -12   0   2   16.76    1.09
 -11   0   6  339.60    8.13
   6  -5   4   39.82    0.87
   3  -3   8 2902.44   34.71
 -11  -2   5   34.03    1.06
 -12   0   3    0.56    0.84
  -4   0  10  191.44    4.24
   5  -3   7  631.88    9.72
 -10  -4   1 4264.13   49.67
   9  -4   2   40.51    1.00
 -10  -4   3  911.37   11.78
   7  -5   3    0.25    0.41
 -11  -3   2 5939.21   73.32
   5   0   8  419.40    8.32
  -3  -1  10  138.47    2.43
   1  -4   8   26.30    0.84
  -1   0  10  437.75    8.91
   2  -6   5  812.41   10.06
  11   0   2   72.41    2.27
  -3  -7   2   74.28    1.37
  11  -2   1   30.13    0.97
  -2  -1  10   23.93    0.93
 -12   0   1    0.41    1.00
   2  -7   2    4.61    0.31
   5  -5   5   30.44    0.78
   0  -3   9   20.78    0.97
   6  -2   7   62.66    1.40
   3  -7   1   73.82    1.22
 -12  -1   2   19.54    0.84
 -11  -1   6    0.47    0.59
  -6  -6   4  180.04    2.74
 -11  -3   3 1286.09   16.08
  -1  -7   3    5.05    0.47
   5  -6   3   20.47    0.65
   3   0   9   -0.09    0.87
  10  -2   3    8.54    0.69
   1  -5   7  125.76    2.31
 -11  -3   1  533.41    7.57
  -5  -3   9   37.33    1.09
  10  -3   2    3.02    0.72
 -12  -1   3    0.19    0.65
  -4  -1  10   54.34    1.37
   2  -2   9 1894.44   23.43
   0  -7   3   32.09    0.81
  -7  -6   1  171.31    2.59
  -9  -3   7   13.55    0.75
  -7  -6   2   94.13    1.62
  -5  -6   5 5179.77   59.58
  -2  -7   3   42.13    0.97
   5  -1   8   29.01    1.00
  -8   0   9    0.56    1.22
 -12   0   4    2.68    0.84
  -5   0  10  152.77    3.58
   4  -6   4    0.84    0.44
  -5  -5   7 1592.17   19.51
  -7  -2   9   79.99    1.71
   9   0   5   -0.56    0.72
  -1  -1  10   54.00    1.37
  11  -1   2    7.73    0.78
   8   0   6   52.41    1.78
 -12  -1   1  115.44    2.27
  10  -4   0  631.25    8.63
   6  -6   2   63.50    1.09
  -9  -5   2  274.01    4.02
   3  -1   9  622.72    8.44
 -10  -3   6  253.17    3.89
  -2  -6   6   16.79    0.69
  -9  -5   1  286.23    4.21
   7  -6   0   46.21    0.97
  -4  -7   1   32.65    0.81
 -10  -2   7   99.87    1.96
  -7  -5   6  700.61    9.10
  -1  -6   6   11.09    0.59
   1  -7   3    1.65    0.34
 -10  -4   4  199.67    3.08
   4  -4   7  386.28    6.01
  -8  -5   5   33.34    1.09
   0   0  10  223.88    5.17
  -6  -4   8  137.57    2.34
   4  -7   0    2.96    0.41
   8  -5   2   98.93    1.78
 -11  -3   4  332.75    4.86
  -8  -1   9   27.73    1.00
 -12  -1   4   74.88    1.59
  -5  -1  10    3.24    0.78
   9  -1   5   97.72    1.93
  -9  -2   8    3.33    0.72
  -7  -6   3   79.30    1.50
  12   0   0  384.25    8.44
   8  -1   6  225.28    3.52
  -9  -5   3   77.40    1.53
  -3  -6   6   47.02    1.12
  -3  -7   3  138.44    2.31
  -8  -3   8  608.82    8.13
  11  -3   0 3180.38   44.21
  10   0   4  308.76    6.70
  -4  -7   2   25.71    0.75
  -9  -4   6  209.86    3.30
   8  -3   5    2.93    0.65
   0  -6   6   16.64    0.62
   1  -3   9  618.91    9.00
   3  -7   2    2.62    0.34
   7  -4   5   63.03    1.50
  -8  -4   7   94.88    1.78
   4  -5   6    6.39    0.50
   7   0   7    1.34    1.03
   0  -1  10  261.11    4.02
   2  -4   8 1825.58   22.59
   8  -4   4   25.58    0.87
   9  -5   0  455.48    6.23
  -6  -3   9    0.81    0.72
  -3  -2  10    4.58    0.78
   3  -6   5    0.03    0.59
  -6   0  10    0.31    0.97
   2  -5   7  516.71    7.07
  12  -1   0   77.84    1.71
  -2  -2  10    4.58    0.81
   7  -3   6    4.67    0.65
   9  -3   4   57.27    1.37
   4  -7   1   57.83    1.31
 -12  -2   2  168.91    3.05
 -11  -2   6  114.63    2.18
  10  -1   4    7.10    0.69
 -12   0   5   -0.75    0.81
   2  -7   3   30.13    0.81
   7  -6   1   16.02    0.56
 -12  -2   3 2086.45   27.54
  -4  -2  10    4.52    0.75
  -4  -6   6  533.07    7.17
 -10   0   8   54.96    1.81
  -6  -5   7 2145.28   26.02
   7  -1   7   40.85    1.09
   4  -3   8 1699.20   24.43
  10  -4   1  164.52    2.74
   6  -4   6    6.54    0.65
   5  -2   8  394.82    5.86
  -1  -7   4   39.42    0.93
  -6  -6   5 4451.71   51.51
  -1  -2  10   24.86    1.12
  11  -2   2    5.23    0.62
  -6  -1  10   57.15    1.53
   1  -6   6   18.76    0.62
  -9  -5   4   99.55    1.81
 -12  -2   1  988.46   13.87
 -11   0   7    0.41    1.09
   1   0  10    0.19    1.12
  -4  -7   3  264.32    3.77
  -2  -7   4  458.13    6.33
 -12  -1   5   11.59    0.84
   3  -2   9 1830.16   24.86
   9  -4   3  170.94    2.80
   0  -7   4   10.50    0.53
  -7  -6   4   13.12    0.69
 -10  -4   5  270.37    4.05
 -11  -3   5  266.22    4.05
 -10  -1   8  894.86   13.34
  -5  -7   1   30.85    0.81
  -8  -2   9   24.65    1.00
 -12  -2   4   45.40    1.50
  -5  -2  10   -0.12    0.62
   4   0   9   -0.44    1.03
   9  -2   5   22.40    0.87
  -2  -4   9   20.78    0.87
  -7  -4   8  102.98    1.87
  11  -3   1  138.25    2.99
  11   0   3    0.62    0.93
  -3  -4   9  184.96    2.93
  -2  -5   8  469.66    6.67
   8  -2   6   14.55    0.75
  12   0   1    0.72    0.87
   7  -5   4   99.55    1.74
 -11  -1   7  160.25    2.99
   1  -1  10  269.06    4.18
   6  -6   3   31.91    0.69
   5  -6   4    2.18    0.53
   5  -7   0  105.04    1.78
   9  -5   1  110.55    2.03
   6  -3   7   76.90    1.68
  -3  -5   8  437.07    6.17
  10  -3   3   20.97    0.81
  -5  -7   2    7.42    0.59
  -3  -7   4 1275.94   16.08
   6  -5   5    5.98    0.47
  -9   0   9   -0.34    1.22
   2  -3   9 1054.36   13.49
  -1  -5   8   50.66    1.22
   1  -7   4    2.71    0.37
   4  -7   2    2.90    0.28
   0  -2  10   72.38    1.62
  -1  -4   9  287.85    4.33
   6   0   8   17.54    1.34
  -5  -6   6 1209.22   15.21
  -4  -4   9   56.15    1.37
   3  -7   3  278.81    5.98
   4  -1   9   72.16    1.59
  -7  -3   9  161.28    2.71
  -7   0  10   67.52    2.27
  11  -1   3   68.49    1.43
  12  -2   0  294.86    4.64
  -8  -5   6  201.60    3.15
  -8  -6   2  201.19    2.99
  12  -1   1   48.30    1.28
  -8  -6   1   48.76    1.03
   8  -5   3  104.82    1.90
  10  -2   4    3.46    0.65
   3  -4   8 1335.01   20.13
  -4  -5   8  241.30    3.61
   3  -5   7 1043.89   13.55
   2  -6   6  282.61    4.02
 -10  -3   7  132.49    2.31
  -9  -1   9  408.99    6.82
   5  -4   7  194.90    3.43
   7  -6   2  104.82    1.78
   7  -2   7    2.65    0.69
   4  -6   5   14.18    0.78
   6  -1   8   14.99    0.78
 -11  -4   2 1999.95   24.21
   5  -7   1   96.62    1.90
   0  -5   8  196.02    3.21
 -12   0   6   49.45    1.74
  -7  -1  10  159.22    2.68
  -9  -3   8    9.44    0.78
  -6  -2  10   35.49    1.12
  -5  -7   3  443.71    6.11
  -9  -5   5    2.40    0.59
  -8  -6   3   99.37    1.78
   0  -4   9 1159.87   15.83
  -4  -7   4 1770.24   21.50
  -7  -5   7 1340.84   16.83
   8  -6   0   10.87    0.59
 -11  -4   3 1671.44   20.63
 -12  -2   5  277.97    4.52
   5  -5   6   24.18    0.97
   2   0  10   87.43    2.56
 -11  -4   1 2907.90   35.15
  -5  -4   9   34.87    1.09
  10  -4   2   22.84    0.81
   2  -7   4    2.31    0.59
  -9  -4   7  248.68    3.65
 -10  -2   8    1.68    0.75
 -12  -1   6   46.08    1.25
  -3  -3  10    5.36    0.84
  -7  -6   5 1101.41   13.83
  -2  -3  10    0.78    0.72
 -11  -2   7   45.49    1.18
  -5  -5   8  234.88    3.52
 -10  -5   2  343.59    4.99
   1  -2  10    3.49    0.81
  -2  -6   7    9.82    0.62
 -12  -3   2 3026.55   42.47
 -11  -3   6    0.50    0.62
   2  -1  10   70.36    1.53
 -10  -4   6   82.57    1.68
 -13   0   2   89.02    2.46
 -12  -3   3 1523.93   20.28
 -13   0   3   -0.03    0.90
  -4  -3  10   23.46    1.03
  -1  -6   7   13.74    0.65
 -10  -5   1    7.32    0.69
  -3  -6   7   48.39    1.12
  -1  -7   5   26.24    0.78
   9  -5   2   32.37    0.87
  -6  -7   1   25.89    0.69
  -6  -6   6 1545.43   18.91
 -10  -5   3  149.38    2.59
  -2  -7   5   10.66    0.59
 -11  -4   4 1469.81   18.57
   5  -3   8  320.07    5.27
   9   0   6  398.71    8.19
   4  -2   9  828.33   11.15
   1  -5   8  578.94    7.95
  -1  -3  10  251.30    4.08
  11  -3   2  290.65    4.77
  11  -2   3   34.21    1.03
 -12  -3   1   14.40    1.00
  12  -2   1   69.89    1.56
  -8  -4   8  122.83    2.12
  -6  -7   2   57.99    1.18
  11  -4   0  821.32   10.94
   4  -7   3   19.51    1.18
  12   0   2   30.88    1.34
  10   0   5   -0.16    0.78
   3  -3   9  623.49   10.00
   0  -7   5    1.56    0.41
   8  -4   5   -0.12    0.56
  -8  -6   4   40.10    1.06
   6  -7   0  145.36    2.21
   8  -6   1    1.15    0.47
 -13  -1   2   13.46    0.84
   1  -4   9 3191.16   38.48
 -13  -1   3   51.01    1.40
   5  -7   2  173.56    2.93
  -9  -2   9   12.56    0.78
 -13   0   1   -0.44    0.87
   0  -6   7   -0.12    0.50
  -8   0  10    8.79    1.22
 -13   0   4   77.49    2.49
   3  -6   6  104.26    1.84
  -3  -7   5    9.60    0.62
   6  -2   8   85.00    1.78
  -6  -4   9   89.08    1.74
  -3   0  11    0.81    0.93
  -8  -3   9  211.57    3.18
 -12  -3   4  121.43    2.27
  -5  -7   4 1763.42   21.38
  -5  -3  10   44.00    1.25
   9  -1   6   26.08    0.93
  -4  -6   7  721.86    9.57
   8   0   7   -1.28    0.93
  -7  -2  10  107.81    2.09
   9  -3   5    4.58    0.65
   7  -4   6   42.97    1.22
 -11   0   8   24.62    2.34
   8  -3   6   -0.03    0.62
  10  -5   0 1975.65   24.02
   9  -4   4    5.33    0.78
  -2   0  11    1.59    1.12
  -4   0  11   -1.62    1.15
   5   0   9    0.47    1.03
  12  -1   2  620.72    8.91
   6  -6   4   48.89    1.03
  10  -1   5  117.47    2.21
   3  -7   4   11.50    1.09
 -13  -1   1   25.89    0.97
 -10  -5   4   14.49    0.78
   0  -8   0  385.97    7.70
   4  -5   7 1113.78   14.15
  -8  -1  10  220.23    3.52
 -13  -1   4  154.92    2.65
  -6  -7   3  156.23    2.49
   0  -3  10 1405.50   18.04
   4  -4   8 2111.94   27.83
  -6  -5   8  451.53    6.11
   1  -7   5    3.24    0.41
   7  -6   3  124.45    2.03
  -3  -1  11  123.02    2.31
 -12  -2   6   26.27    1.06
   8  -1   7    0.34    0.69
 -10   0   9   -1.00    0.97
   1  -8   0   11.28    0.56
  12  -3   0  651.07   12.18
 -11  -1   8   33.31    1.12
   0  -8   1   44.09    0.97
  11   0   4  198.20    4.64
   5  -6   5  212.29    3.05
  -2  -1  11   22.00    0.90
  -4  -1  11  129.37    2.34
   5  -1   9    1.93    0.78
   6  -7   1    3.52    0.34
  10  -3   4   48.08    1.25
  -1  -8   1   39.42    0.93
  -4  -7   5    3.33    0.62
  -9  -5   6  385.03    5.52
  -1   0  11    0.97    1.06
   2  -2  10   30.50    1.09
  -5   0  11    0.41    1.15
   3   0  10   12.81    1.28
   1  -6   7  194.18    3.05
 -11  -4   5   81.89    1.74
 -12   0   7    1.96    1.22
   7  -5   5  157.07    2.65
  -8  -5   7  395.04    5.58
  13   0   0  324.68    7.23
   7  -3   7   22.90    0.90
   1  -8   1  372.26    5.17
   2  -5   8 1420.20   18.23
   8  -5   4   90.74    1.87
 -13   0   5   -0.78    0.87
  -5  -6   7 1915.76   23.28
 -10  -1   9  205.90    3.65
  -6  -3  10   -0.06    0.78
  11  -4   1   69.45    1.50
   2  -8   0    5.73    0.50
  11  -1   4   26.98    0.90
   6  -4   7   33.40    1.09
  -9  -6   2   57.80    1.22
  -2  -8   1   14.68    0.59
 -12  -3   5   13.18    0.81
  10  -4   3  146.79    2.87
  -1  -1  11    0.90    0.75
  -5  -1  11    2.46    0.81
   7   0   8  181.00    4.27
   3  -1  10   11.72    0.93
  -9  -6   1  139.81    2.37
 -13  -2   2   54.19    1.37
 -13  -2   3  775.61   11.15
   2  -4   9 6755.49   91.30
 -12  -1   7    1.40    0.75
  -7  -6   6 1132.04   14.18
  -8  -6   5   62.47    1.34
 -10  -3   8    0.84    0.65
  13  -1   0   13.83    0.90
  10  -5   1  268.03    4.21
  -1  -8   2    0.22    0.47
   8  -6   2   59.17    1.22
   0  -8   2   14.61    0.59
   6  -5   6    1.90    0.50
 -13  -1   5  185.86    3.18
   9  -2   6    3.89    0.62
  -7  -4   9    2.06    0.72
   2  -7   5   25.24    0.87
   2  -8   1   19.63    0.65
  -9  -6   3    7.45    0.72
 -11  -3   7    0.62    0.65
   1  -3  10 2757.43   35.40
  -6  -7   4  897.38   11.34
   0   0  11   -0.72    1.00
  12  -2   2  260.43    4.30
   5  -7   3  378.83    8.13
  10  -2   5   19.23    0.81
  -6   0  11   -0.25    1.22
   9  -5   3  175.80    2.90
   7  -1   8    3.89    0.69
 -10  -5   5  119.74    2.09
 -10  -4   7   45.52    1.25
  -2  -8   2   35.40    0.93
 -13  -2   1   90.08    1.90
  -7  -7   1   45.12    1.00
   1  -8   2  734.73    9.44
   4  -6   6   93.98    1.65
  -8  -2  10    0.59    0.87
 -13  -2   4  205.18    3.52
  -7  -7   2   54.72    1.12
  -5  -7   5    3.30    0.62
   9  -6   0   46.02    1.03
  -3  -2  11  548.65    8.57
   4  -3   9   84.44    2.06
   4  -7   4   45.65    1.62
   8  -2   7   27.89    1.06
  -3  -8   1    8.57    0.56
  -2  -5   9   88.83    1.74
  -9  -4   8   91.14    1.78
  -7  -5   8  574.98    7.82
  11  -3   3    1.06    0.69
   2  -6   7  373.13    5.30
  -3  -5   9   36.52    1.03
   3  -8   0    6.51    0.50
 -11  -2   8   30.44    1.03
  -9   0  10  136.54    3.80
  12  -3   1  279.34    4.67
   6  -7   2   12.87    0.53
  -2  -2  11 1067.76   14.49
  -4  -2  11    0.28    0.72
   5  -2   9  144.11    2.52
   0  -1  11   28.57    0.97
  -6  -1  11   72.85    1.65
  -2  -7   6  178.85    2.68
   7  -7   0   94.79    1.62
  -9  -3   9    0.19    0.69
  12   0   3    0.75    0.93
  -1  -7   6   12.68    0.62
  -6  -6   7 2598.77   31.10
  -1  -5   9   99.49    1.90
   6  -3   8   12.43    0.84
  -4  -5   9   -0.12    0.53
  -3  -4  10   24.05    1.00
  13   0   1   -0.09    0.93
  -7  -3  10   22.84    1.03
 -10  -2   9  290.59    4.30
  -3  -8   2   60.04    1.28
  -7  -7   3   41.22    1.03
  -2  -4  10    0.97    0.65
  -9  -6   4    5.39    0.72
  -9  -1  10   33.09    1.09
  -3  -7   6  997.28   12.90
   2  -8   2   20.78    0.59
  11  -2   4   44.81    1.18
   3  -8   1   40.32    0.84
 -13   0   6  409.65    8.44
 -12  -4   2 1197.73   15.64
 -11  -4   6    0.03    0.65
  -1  -8   3   22.62    0.72
   3  -5   8 2404.61   29.32
  -1  -2  11  157.63    2.80
  -5  -2  11  114.07    2.18
   3  -2  10    1.65    0.75
   0  -7   6  143.11    2.46
 -12  -4   3 1343.99   16.92
  -4  -4  10    1.25    0.65
 -12  -2   7  137.01    2.65
   5  -5   7  176.70    2.93
  12  -1   3  406.56    6.11
   0  -8   3   15.02    0.59
  13  -2   0   14.64    0.81
 -11  -5   2 1762.92   21.59
  -2  -8   3  123.08    2.12
   5  -4   8  711.55   10.41
 -12  -3   6  268.40    4.21
 -13  -2   5  500.42    7.88
   1   0  11    0.62    1.22
  13  -1   1  143.15    2.71
   3  -7   5   74.41    1.68
  -1  -4  10  178.07    2.90
  11  -4   2   15.80    0.90
  -2  -6   8  374.00    5.33
  -7   0  11   -0.09    0.97
 -12  -4   1 3191.51   38.86
   7  -6   4   63.00    1.22
   4   0  10    1.25    1.09
   9  -6   1   99.90    1.74
   0  -5   9    1.28    0.62
 -13  -1   6   20.63    0.97
 -11  -5   3  799.82   10.41
  -3  -6   8  326.52    4.74
   3  -4   9 1588.03   21.41
   6   0   9    0.25    1.03
   2  -3  10 2676.26   37.33
   7  -2   8   28.60    1.06
 -11  -5   1  159.19    2.59
  -5  -5   9  176.73    2.84
  -4  -8   1    2.12    0.50
   7  -7   1   68.74    1.25
  10  -5   2   45.52    1.12
   6  -6   5   30.63    0.75
   1  -8   3   28.32    0.75
  -1  -6   8   12.96    0.69
  -4  -7   6 2486.19   30.29
  -9  -5   7  415.76    5.83
   4  -8   0    0.50    0.44
  -8  -4   9  139.28    2.34
 -12  -4   4 2014.81   24.62
  -5  -4  10    8.97    0.75
   1  -1  11    8.13    0.81
   9  -4   5   90.74    1.90
  -6  -7   5   62.63    1.31
  -8  -6   6  349.67    4.83
   1  -7   6   32.09    0.84
  -7  -1  11    0.44    0.84
   8  -4   6    6.51    0.65
  -3  -8   3    5.45    0.56
 -11   0   9   -1.22    0.97
   4  -1  10   60.73    1.46
   8  -6   3   42.19    0.97
   0  -2  11  185.49    3.24
 -12   0   8   95.72    3.33
  -4  -8   2   36.36    0.93
  -4  -6   8   15.67    0.81
  -6  -2  11  111.77    2.09
   6  -1   9    2.06    0.81
 -10  -5   6   19.79    0.90
  -7  -7   4   39.73    1.00
   3  -6   7   20.53    0.72
 -13  -3   2 2133.53   33.68
  10   0   6  324.62    6.92
 -13  -3   3  756.14   10.72
   3  -8   2   31.41    0.87
   0  -4  10  298.69    5.42
 -11  -5   4  154.86    2.56
   0  -6   8   35.27    0.97
   9  -3   6  108.81    2.06
   9   0   7    0.37    1.06
  12  -4   0 1181.49   16.45
  -9  -2  10  323.12    5.17
   4  -8   1  251.24    4.14
  -8  -5   8  191.78    2.96
 -11  -1   9   35.12    1.34
  -9  -6   5  199.85    3.02
   6  -7   3  862.45   16.23
  11  -5   0  285.54    4.52
   5  -7   4  577.66   12.03
  -7  -6   7 2012.88   24.37
  12  -3   2   -0.97    0.75
  10  -4   4    1.74    0.69
 -14   0   3    0.22    0.87
 -12  -1   8  279.62    4.77
   5  -6   6   64.78    1.28
  10  -3   5   47.61    1.22
   2  -8   3  328.32    5.39
   8  -5   5   73.07    1.43
 -14   0   2   11.56    1.09
  11   0   5   -0.65    0.93
  10  -1   6  254.60    3.99
   1  -5   9  151.43    2.65
 -13  -3   1   25.21    1.25
  12  -2   3  142.18    2.52
  -8  -3  10   72.10    1.59
 -13  -3   4  601.87    8.69
   7  -4   7    6.73    0.69
  -5  -7   6 3711.93   43.40
  -6  -5   9  574.57    7.85
  -3  -3  11   62.75    1.53
   8  -3   7  207.52    3.46
   9  -1   7  125.14    2.31
  13  -2   1   -0.03    0.69
  -1  -8   4  278.34    4.21
  -6  -4  10    1.34    0.75
   7  -5   6    6.70    0.59
 -11  -3   8    6.73    0.84
  -8  -7   2   22.93    0.78
   9  -5   4   35.49    1.00
  -8  -7   1    0.12    0.50
  -5  -6   8  839.40   10.78
 -10  -6   2   65.06    1.31
  -4  -8   3    0.00    0.53
  -2  -3  11   92.79    1.93
 -14   0   4   80.20    2.56
 -13  -2   6  105.75    2.15
  -4  -3  11    0.16    0.90
   5  -3   9   71.57    1.59
  -2  -8   4  125.29    2.06
 -14  -1   3    6.20    0.69
 -12  -4   5  329.13    4.92
  13   0   2    8.94    1.00
 -10   0  10    3.02    1.40
   2   0  11   -2.87    1.28
   0  -8   4  167.54    2.65
 -14  -1   2    0.37    0.75
  11  -1   5   24.49    0.93
   2  -7   6  536.84    7.04
  -8   0  11   -1.56    1.37
 -10  -6   1   48.73    1.15
   7  -7   2  265.63    3.77
 -10  -4   8  140.34    2.52
 -13   0   7   -0.06    0.97
   4  -5   8  792.60   10.53
   4  -7   5  728.53   11.15
 -14   0   1   -0.25    1.00
  -5  -8   1   12.78    0.62
   9  -6   2    5.76    0.53
 -10  -6   3    2.99    0.65
   8   0   8  132.74    3.40
   1  -6   8   12.00    0.65
   1  -2  11  349.01    5.48
 -10  -3   9   12.06    0.90
  -7  -2  11   -0.31    0.65
 -11  -4   7    4.39    0.72
   1  -4  10  367.37    5.80
  -8  -7   3   46.49    1.06
  11  -3   4  865.73   11.44
   4  -2  10  103.07    2.03
 -14  -1   4   87.59    1.87
   5  -8   0    1.25    0.44
   8  -7   0  140.18    2.18
  13  -1   2    0.69    0.62
  -5  -8   2  253.70    3.71
 -10  -1  10  114.95    2.46
  -1  -3  11    0.56    0.90
   6  -2   9    3.80    0.81
  -3  -8   4   32.87    0.93
   2  -1  11   37.45    1.28
  -5  -3  11    7.29    1.03
   3  -3  10 2337.40   30.50
 -11  -5   5   46.89    1.18
 -12  -3   7   93.26    1.93
  -8  -1  11   99.24    1.93
   1  -8   4    1.37    0.34
   4  -8   2  361.51    5.73
  13  -3   0   51.41    1.37
 -13  -1   7    5.64    1.03
 -14  -1   1   16.89    0.87
   8  -1   8  120.12    2.34
   3  -8   3  340.73    6.23
  12   0   4   91.08    2.65
 -13  -3   5   66.59    1.56
   4  -4   9 1970.63   25.96
  -7  -7   5  132.89    2.27
  11  -5   1  601.43    8.29
  11  -4   3  202.66    3.55
  10  -6   0    7.35    0.59
  12  -4   1   26.24    1.06
 -11  -2   9   82.63    1.78
  -2  -7   7    1.53    0.56
   6  -5   7   75.69    1.56
 -14   0   5    0.53    0.90
 -12  -2   8   11.97    0.81
  10  -5   3   40.20    1.06
   7  -3   8    7.23    0.81
  10  -2   6   22.78    0.93
  -1  -7   7    0.97    0.53
  -9  -4   9   91.55    1.78
   2  -5   9    9.60    0.75
 -10  -6   4    4.83    0.62
   4  -6   7    2.49    0.41
  -3  -7   7   45.84    1.09
  -6  -6   8 1808.17   22.03
   6  -4   8  426.38    6.14
   5   0  10   27.70    1.65
  -6  -7   6 2849.63   33.59
   5  -8   1    4.08    0.47
  -3   0  12  101.55    2.77
  12  -1   4    6.76    0.84
   9  -2   7    0.34    0.69
  -7  -5   9  699.43    9.41
  -7  -4  10   10.00    0.87
  -5  -8   3    1.00    0.59
  -4   0  12   30.07    1.43
  14   0   0   14.05    1.25
  -4  -8   4  122.70    2.09
 -14  -1   5  193.37    3.15
   0  -3  11  254.94    4.08
 -14  -2   3   34.49    1.12
  -9  -6   6    0.47    0.59
  -6  -3  11   30.13    1.18
  -8  -7   4  671.88    8.88
 -14  -2   2    1.28    0.75
  11  -2   5    7.67    0.78
   8  -7   1   44.74    1.00
  -2   0  12  519.58   10.25
 -10  -5   7  107.09    1.99
   7  -6   5    4.61    0.47
  -8  -6   7  582.99    7.98
   0  -7   7    0.84    0.44
   2  -8   4   18.91    0.50
   3  -7   6  223.26    4.08
   2  -6   8    3.86    0.59
   8  -6   4    5.92    0.47
   5  -1  10    0.34    0.90
 -12  -4   6   13.18    0.84
  -3  -1  12   97.78    1.99
  -4  -7   7  259.40    3.83
  -9  -5   8 1736.16   21.34
  -5   0  12   11.00    1.25
  -4  -1  12   21.38    1.06
  14  -1   0    2.59    0.81
  -9  -3  10  168.26    2.77
 -14  -2   4  500.60    7.51
   7   0   9   -1.15    1.06
   6  -7   4  673.91   10.25
  13  -2   2   63.56    1.53
 -10  -2  10  404.73    5.67
   2  -2  11   91.45    1.99
   2  -4  10  186.39    3.33
  -2  -1  12  336.24    5.02
  12  -3   3  149.72    2.59
  -8  -2  11  106.41    2.56
   3   0  11    0.28    1.03
 -13  -2   7  270.93    4.39
  -1  -8   5    1.22    0.53
 -14  -2   1   33.40    1.06
  10  -6   1   40.85    1.22
  -6  -8   1   86.59    1.56
  -9   0  11    0.00    1.18
   7  -7   3  531.98    7.51
   6  -6   6   30.22    0.78
  -2  -8   5   69.11    1.43
  -1   0  12  353.44    7.45
   8  -2   8   49.51    1.28
  -3  -5  10  249.62    3.71
  13  -3   1  113.05    2.46
  -5  -1  12   18.10    1.06
  -2  -5  10  197.46    3.18
 -12   0   9   -0.84    1.74
  -6  -8   2  230.83    3.55
   5  -7   5  587.94    9.22
   4  -8   3   25.77    1.34
 -13  -3   6  164.61    2.93
   7  -1   9   47.02    1.34
 -12  -5   2 1354.39   17.48
 -11  -5   6    0.44    0.75
   0  -8   5    0.00    0.44
   9  -6   3    8.60    0.56
 -14   0   6 1477.94   25.86
   1  -7   7   25.15    0.78
 -10  -6   5   62.79    1.43
   6  -8   0    0.62    0.41
 -13  -4   2  749.22   10.28
 -12  -5   3 1339.94   16.92
 -13  -4   3  418.53    6.17
  -4  -5  10   29.76    1.06
   5  -8   2   96.69    1.90
   3  -1  11   54.44    1.65
  -3  -8   5  302.90    4.27
  -6   0  12    1.62    1.15
  13   0   3    0.34    1.12
  -9  -1  11  372.69    5.52
  -1  -1  12  588.91    8.23
   5  -5   8   35.52    1.06
  -5  -8   4  174.21    2.74
  12  -2   4    9.53    0.78
   9  -4   6    3.89    0.65
  -5  -7   7  510.70    7.23
   1  -3  11  717.44   10.94
  -1  -5  10  153.55    2.68
  11  -5   2   37.83    1.03
  -2  -6   9   23.18    0.90
  -7  -6   8 1022.27   13.02
  -3  -6   9    3.86    0.72
  -7  -3  11  245.66    4.02
 -12  -5   1  260.96    3.99
 -12  -1   9    7.98    0.87
   4  -3  10  831.95   11.81
  -9  -7   2    3.46    0.59
 -13   0   8  215.34    5.76
 -14  -2   5  164.18    3.05
  12  -4   2   41.44    1.31
  10  -4   5   90.86    1.78
   3  -5   9    5.83    0.72
 -11   0  10  217.52    4.89
   6  -3   9  470.38    6.70
   3  -8   4  222.79    5.23
 -14  -1   6   87.25    1.93
  -9  -7   1  214.87    3.30
 -13  -4   1  503.94    7.35
  -7  -7   6  865.51   11.19
  14   0   1   -0.28    1.00
  -8  -4  10  204.87    3.21
 -13  -4   4 1866.21   23.06
  -6  -8   3    6.42    0.62
  -8  -7   5   87.25    1.65
  -1  -6   9   50.88    1.28
   5  -2  10   58.02    1.53
  -6  -1  12   83.85    1.84
   8  -7   2  346.77    4.89
  13  -1   3   18.38    0.90
   1  -8   5   81.51    1.59
  -3  -4  11  356.24    5.27
  -8  -5   9  819.70   10.59
 -12  -5   4   33.50    1.09
  -4  -6   9   14.08    0.78
  -5  -5  10   88.65    1.90
  -3  -2  12    0.75    0.81
   8  -4   7    7.60    0.72
   0   0  12    1.71    1.25
   9  -5   5    5.39    0.59
  -4  -2  12   -0.47    0.78
  14  -2   0    3.89    0.78
 -11  -4   8  123.98    2.21
   8  -5   6   27.54    0.90
  -9  -7   3   48.86    1.15
 -11  -3   9   41.01    1.22
  -2  -4  11  214.53    3.46
  -4  -4  11  130.68    2.43
 -13  -1   8  170.10    2.84
   5  -4   9   18.23    1.00
   6  -8   1  630.19    9.75
 -12  -3   8    0.16    0.72
   3  -6   8    8.60    0.59
 -11  -1  10   59.83    1.62
  -4  -8   5  499.79    6.92
  -2  -2  12   -0.37    0.65
  10  -3   6  169.35    2.87
   5  -6   7   43.78    1.03
  14  -1   1  192.97    3.30
   4  -7   6    0.75    0.72
   0  -5  10  499.57    7.95
  10   0   7   -1.74    1.03
   9  -7   0    0.59    0.50
 -11  -6   2  119.28    2.15
  11   0   6  279.72    6.17
   0  -1  12  510.85    7.26
   9  -3   7   56.90    1.37
 -10  -4   9   51.16    1.37
  -5  -2  12   50.42    1.31
   2  -7   7   16.23    0.62
  12  -5   0   42.13    1.25
  11  -4   4   77.31    1.81
   0  -6   9   13.93    0.75
   7  -2   9   97.09    1.99
 -11  -6   3   44.62    1.18
  10  -5   4    6.42    0.59
 -14  -3   3  160.50    3.30
  -7   0  12   28.70    1.53
  -1  -4  11    4.39    0.90
  -5  -4  11    0.41    0.72
   3  -4  10   62.66    1.59
 -14  -3   2  357.89    7.04
 -11  -6   1  173.53    2.80
  11  -3   5   31.63    1.03
  -5  -6   9   33.87    1.06
  10  -6   2   92.01    1.78
 -12  -4   7   40.26    1.09
   0  -9   0    0.00    0.72
   3  -2  11   43.03    1.31
  -9  -6   7  407.44    5.80
  13  -4   0  143.86    2.68
  -6  -7   7  944.87   12.40
   7  -5   7  356.27    5.17
  10  -1   7  164.24    2.96
  -9  -2  11   77.77    1.99
  11  -1   6  684.60    9.53
  -1  -2  12   39.82    1.25
 -13  -4   5  302.03    4.36
   1  -9   0   21.09    0.75
   2  -8   5  296.26    4.99
  -6  -5  10  257.97    4.05
   6   0  10   36.99    1.81
   9   0   8   46.99    1.71
  -9  -7   4  330.38    4.77
   0  -9   1    4.52    0.56
 -12  -2   9    1.06    0.78
 -14  -3   4  661.85    9.60
  -6  -8   4   28.70    0.90
  -7  -1  12   82.23    1.81
   5  -8   3  152.18    3.80
 -12  -5   5  100.21    1.84
  -1  -9   1    9.69    0.62
  13  -3   2   12.96    0.75
 -10  -3  10  227.24    3.58
  12   0   5    0.84    1.15
 -14  -2   6  537.62    8.54
   2  -3  11  532.29    7.85
 -10  -6   6  141.65    2.34
   7  -4   8   29.32    1.06
  -8  -3  11   46.61    1.31
  -7  -8   1   68.77    1.34
   4   0  11    1.18    1.28
 -14   0   7    0.19    1.22
 -10  -5   8   71.51    1.56
 -13  -3   7  353.84    5.23
 -14  -3   1    0.78    0.72
   1  -9   1    5.64    0.53
  -7  -8   2   19.72    0.75
  -5  -8   5  465.89    6.48
  -6  -2  12  148.97    2.62
  13  -2   3   32.13    1.12
 -10   0  11    1.37    1.15
 -15   0   3    0.16    1.00
 -11  -6   4  134.17    2.37
   1   0  12  494.90   10.22
   8  -3   8    9.97    0.84
   4  -8   4   17.23    1.37
  -2  -7   8    2.18    0.62
   6  -1  10    0.50    0.90
   9  -1   8  221.45    3.65
   7  -7   4  122.17    2.03
 -11  -5   7  105.72    2.09
   2  -9   0    1.46    0.50
  -8  -6   8   44.68    1.22
   6  -8   2   72.88    1.50
   1  -5  10 1230.29   15.77
  11  -6   0  190.29    2.99
 -15   0   2   22.09    1.37
   9  -7   1   37.83    0.97
 -13  -2   8    0.53    0.81
  -2  -9   1   14.24    0.65
   0  -4  11   20.81    1.03
  -3  -7   8   -0.50    0.62
 -11  -2  10    1.96    0.81
  -6  -4  11  142.33    2.52
  12  -1   5  217.55    3.55
   8  -6   5    2.52    0.47
  -2  -8   6  142.90    2.52
   7  -8   0   77.34    1.43
   1  -6   9    1.46    0.59
   6  -7   5  174.74    3.80
 -15   0   4    8.69    1.31
  -1  -8   6   36.46    1.03
  14  -2   1    0.19    0.69
  -1  -7   8   16.17    0.81
   4  -1  11   74.10    1.71
 -14  -1   7  297.57    4.71
  -1  -9   2  247.43    3.80
   0  -9   2   16.33    0.65
  -6  -6   9   75.62    1.65
 -10  -1  11    4.61    0.84
 -15  -1   3   58.77    1.50
   1  -1  12   32.28    1.15
  12  -3   4    7.76    0.75
   4  -5   9  101.58    1.99
   0  -2  12  180.38    3.12
  -7  -8   3   21.19    0.84
  11  -5   3  116.82    2.21
  -8  -7   6  223.13    3.37
   7  -6   6   70.39    1.46
   2  -9   1    7.70    0.56
  -9  -4  10  154.89    2.68
  12  -5   1    2.49    0.69
   9  -6   4   18.98    0.72
  -3  -8   6   42.10    1.12
  14   0   2    9.13    1.06
 -15  -1   2   70.17    1.59
   8  -7   3  199.54    2.99
 -14  -3   5  102.89    1.96
  -4  -7   8    3.89    0.62
   0  -8   6    5.45    0.50
   3  -7   7   43.16    1.03
  -2  -9   2  261.74    3.93
  -9  -5   9    2.40    0.69
  12  -4   3   60.11    1.53
 -15  -1   4   20.32    0.97
  -8   0  12 1039.66   18.94
   1  -9   2   16.33    0.65
 -15   0   1    0.53    1.12
   4  -6   8  475.18    6.70
  10  -2   7    2.90    0.75
   6  -5   8  138.63    2.71
   5  -3  10   16.33    0.97
  11  -2   6   62.44    1.53
   0  -7   8  163.83    2.80
  -3  -3  12  667.02    8.97
   8   0   9   -0.09    1.00
  13  -4   1    0.34    0.75
  -7  -5  10  287.82    4.33
   3  -8   5  284.76    6.70
  -3  -9   1  165.27    2.62
   3  -9   0    0.75    0.53
  -4  -3  12   51.63    1.53
  14  -3   0  129.78    2.62
  14  -1   2    1.50    0.78
  -9  -7   5  144.42    2.40
  -7  -7   7  815.34   10.63
 -13  -4   6   50.42    1.34
  -7  -2  12   18.38    0.93
   5  -7   6    1.59    0.69
  13   0   4  472.75    9.97
 -15   0   5   -0.41    1.09
  -2  -3  12 1300.83   16.98
   7  -8   1 1584.13   18.85
 -11  -6   5   35.96    1.03
  -8  -1  12   25.74    1.18
  -4  -8   6    0.34    0.62
 -15  -1   1    8.10    0.90
 -12  -5   6   18.51    0.90
 -13   0   9    0.41    1.46
   8  -1   9  245.16    3.99
   1  -4  11   53.75    1.50
  -6  -8   5  289.72    4.21
  -3  -9   2   37.55    0.97
  11  -6   1    1.12    0.59
  -5  -3  12   58.45    1.71
   1  -8   6    1.74    0.41
  -7  -4  11   -0.19    0.81
   6  -2  10   10.19    0.97
   9  -2   8    7.88    0.87
 -12   0  10  308.97    6.61
  -5  -7   8   83.66    1.71
 -10  -7   2  105.88    1.87
   2  -9   2   39.60    0.87
   4  -4  10   37.73    1.18
   6  -6   7    3.08    0.53
   3  -9   1   14.18    0.56
   7  -3   9  175.02    3.05
  -1  -9   3    7.95    0.65
  10  -6   3   32.19    0.90
  12  -2   5  168.57    3.02
  13  -1   4   33.09    1.18
   6  -4   9    4.99    0.78
 -15  -1   5   46.49    1.31
   2  -5  10 1173.52   14.93
  -7  -8   4    2.93    0.65
   2   0  12  359.70    7.95
   2  -6   9   62.79    1.40
   0  -9   3    3.74    0.53
 -10  -7   1   14.40    0.72
   4  -2  11  147.69    2.93
   3  -3  11    5.27    0.81
 -14  -2   7  555.54    8.13
   9  -7   2   42.06    1.00
  -9  -3  11   37.11    1.25
 -10  -7   3  775.30   10.03
  -1  -3  12 1109.58   14.40
 -10  -2  11  372.94    5.70
 -15  -2   3   39.63    1.25
   1  -2  12   -0.34    0.97
  -2  -9   3    1.96    0.62
 -13  -1   9    1.03    0.90
   1  -7   8  206.62    3.61
  -7  -6   9  434.58    6.01
 -12  -1  10   30.57    1.34
 -12  -3   9  117.28    2.27
 -11  -4   9    0.93    0.84
   6  -8   3  961.85   18.35
 -15  -2   2    7.70    0.87
   5  -8   4  137.22    3.65
  15   0   0  165.83    4.21
 -12  -4   8    2.93    0.72
 -14  -3   6  111.18    2.15
 -13  -5   2  337.39    4.80
  -4  -9   1    4.18    0.56
  10  -4   6   -0.56    0.72
   2  -1  12  121.02    2.37
 -10  -6   7   25.33    1.00
 -13  -5   3  964.25   13.27
 -15  -2   4  128.53    2.27
   1  -9   3  716.44    9.25
   4  -9   0   13.68    0.62
  -6  -3  12   40.26    1.50
  13  -3   3   85.97    1.78
  -5  -8   6    5.89    0.72
   9  -5   6    2.93    0.65
   9  -4   7   36.36    1.22
 -14   0   8    1.28    1.18
  -9  -6   8    2.27    0.84
  -8  -8   2  134.73    2.24
  10  -7   0    2.09    0.56
  -8  -8   1  131.99    2.12
  -3  -9   3   14.71    0.81
  14  -2   2  188.11    3.33
 -13  -3   8    6.36    0.78
  15  -1   0   33.75    1.18
  12  -5   2  119.28    2.43
 -14  -4   3   97.50    1.96
  -4  -9   2    2.12    0.62
 -15   0   6 1089.14   19.54
  10  -5   5    3.89    0.69
 -11  -3  10    0.90    0.81
   5   0  11    1.68    1.22
 -14  -4   2   62.54    1.56
  11  -4   5    6.73    0.75
   2  -8   6   94.29    2.09
   3  -9   2    3.33    0.53
 -13  -5   1  125.48    2.40
  -8  -2  12  390.27    5.73
  14  -3   1  210.39    3.52
 -10  -7   4   20.44    0.87
   7  -8   2  263.54    5.20
  -9   0  12  960.04   17.42
   4  -7   7   14.33    0.50
 -11   0  11   -0.93    1.46
  -8  -5  10  104.91    1.99
 -13  -5   4    6.95    0.75
 -15  -2   1  151.65    2.65
   4  -8   5  530.39   11.59
  -6  -7   8  285.73    4.14
  -3  -5  11  134.70    2.49
  -3  -6  10    2.12    0.78
   8  -2   9   67.09    1.62
   8  -5   7  181.81    3.61
   0  -3  12  484.84    7.98
 -14  -1   8   21.13    1.12
  -4   0  13   -0.12    1.28
  -3   0  13    0.90    1.25
  -2  -6  10   48.36    1.37
 -11  -5   8   12.93    0.93
   4  -9   1   46.68    1.22
   7   0  10   21.06    1.53
  -8  -8   3   55.68    1.28
  -2  -5  11  143.52    2.49
 -14  -4   4 1140.27   14.86
   8  -8   0   88.09    1.59
  -4  -5  11   83.85    1.68
   5  -5   9  396.72    6.76
 -12  -6   2   71.60    1.53
 -11  -6   6  401.30    5.80
 -15  -1   6    3.40    0.87
  13  -4   2   35.02    1.15
 -10  -4  10    5.05    0.84
   2  -9   3  160.97    2.96
  -9  -7   6  124.17    2.15
  13  -2   4  129.31    2.49
   5  -1  11   10.87    1.06
 -15  -2   5    0.97    0.87
   2  -4  11  187.64    3.27
 -12  -6   3   68.11    1.46
  -4  -6  10    0.34    0.78
   7  -7   5   32.16    0.69
  -8  -4  11  173.81    2.96
  -8  -7   7   59.76    1.34
  -9  -1  12   47.89    1.34
 -11  -1  11   46.27    1.43
 -13  -4   7   55.31    1.46
 -14  -4   1   18.54    0.93
  10  -3   7   14.02    0.93
   2  -7   8   48.05    1.15
   8  -7   4    0.97    0.41
  -5   0  13    0.72    1.37
  11  -3   6    1.59    0.78
  14   0   3   -0.59    1.06
  -2   0  13    0.97    1.15
   5  -6   8  421.05    6.14
   8  -4   8   38.08    1.31
 -13  -2   9   56.37    1.37
  -7  -8   5   21.44    0.81
  -1  -9   4    2.12    0.56
 -10  -5   9  124.23    2.21
  -1  -6  10  225.56    3.71
  11  -6   2   71.07    1.59
  -4  -1  13   51.23    1.50
  -3  -1  13  308.97    4.80
 -12  -6   1   64.56    1.50
 -12  -2  10    0.62    0.81
   7  -1  10    8.60    0.90
  11  -5   4    5.33    0.69
  -4  -9   3   62.38    1.46
  -2  -8   7   12.03    0.72
  11   0   7   -0.28    1.09
  -2  -9   4   35.09    0.97
  -7  -3  12  375.34    6.01
   3  -6   9    0.62    0.62
  -1  -5  11  149.66    2.62
   0  -9   4    1.37    0.50
  -5  -5  11    0.90    0.84
   3  -5  10 1145.66   14.93
   2  -2  12  339.76    5.33
  -1  -8   7   39.82    1.03
 -12  -5   7   33.78    1.15
  -3  -8   7    9.19    0.75
  13  -5   0   86.22    1.81
  -5  -9   1   64.50    1.31
  10  -7   1  109.56    1.96
  -6  -8   6   30.16    1.00
  -5  -1  13   78.65    1.74
   6  -7   6   32.53    1.15
  14  -1   3  303.18    4.61
  -2  -1  13  816.40   11.12
  -8  -6   9 1480.09   18.48
 -12  -6   4  111.05    2.09
  -5  -6  10  109.77    2.09
  12  -4   4    1.09    0.78
 -13  -5   5  215.50    3.43
   3   0  12   85.47    2.52
  12   0   6 2608.99   45.71
  15   0   1   -0.69    1.22
   9  -6   5    5.73    0.59
  10   0   8  878.78   16.48
   6  -3  10  247.47    3.99
   9  -3   8   -0.09    0.72
   8  -6   6  114.54    2.09
   5  -9   0    1.22    0.47
 -14  -4   5  196.36    3.37
  15  -2   0   22.47    0.97
  11  -1   7   25.77    1.06
  -6   0  13    0.69    1.06
  -5  -9   2    0.90    0.59
  12  -3   5  368.71    5.48
  -3  -9   4   78.12    1.62
  -8  -8   4   32.13    1.00
   9  -7   3  165.21    2.65
  -1   0  13   -0.34    1.06
   7  -5   8  212.16    3.83
 -10  -7   5   28.70    1.00
   8  -8   1 2228.22   27.11
   0  -8   7    9.91    0.62
   4  -3  11   22.90    1.06
   1  -9   4    1.56    0.41
   4  -9   2   43.78    1.12
 -14  -3   7 1174.08   15.49
   3  -8   6    9.22    0.72
   0  -6  10  237.71    3.83
   5  -4  10  163.18    2.84
 -10  -3  11   27.08    1.12
 -15  -3   3    0.16    0.93
   1  -3  12  148.41    2.84
  -3  -4  12   53.56    1.46
   3  -9   3  150.37    2.65
  -4  -8   7    0.44    0.65
   3  -1  12  406.97    6.17
  12  -1   6  635.96    9.10
  15  -1   1   57.68    1.56
 -14  -2   8   66.68    1.68
  -2  -7   9   82.51    1.78
  -7  -7   8  657.02    8.60
  -3  -7   9  634.46    8.69
  12  -6   0    6.08    0.75
  10  -1   8   81.73    1.78
  -4  -4  12   12.28    0.90
  14  -4   0   20.10    1.12
 -15  -3   2    7.51    0.87
   0  -5  11  319.57    4.83
  10  -6   4    9.97    0.65
   6  -8   4  355.28    7.95
  -6  -1  13   22.65    1.12
 -15  -2   6  740.47   11.34
 -15   0   7   -0.37    1.12
  -6  -5  11   76.96    1.74
   5  -2  11  170.57    2.99
  -1  -1  13  805.03   11.06
  -2  -4  12    7.57    0.87
 -15  -3   4  172.72    3.21
  -9  -2  12  171.59    3.49
 -11  -2  11  245.35    3.96
   7  -6   7   32.34    1.00
  -1  -7   9  156.48    2.80
   7  -8   3 1865.34   33.78
   5  -9   1    0.59    0.56
  -4  -7   9  472.81    6.48
  -4  -2  13  121.55    2.40
  13   0   5    0.59    1.09
  -6  -6  10  740.06   10.00
  -3  -2  13  320.69    5.27
  -5  -4  12    6.11    0.87
  -5  -9   3   22.28    0.81
  -9  -5  10   21.66    1.00
  14  -3   2   19.88    0.97
   7  -2  10    2.65    0.90
   5  -8   5  969.42   19.29
  -4  -9   4  123.89    2.18
   7  -4   9   67.24    1.74
 -12  -6   5   25.18    1.03
   3  -7   8   30.88    0.90
   9   0   9   -0.56    1.28
 -15  -1   7  672.69    9.50
 -10   0  12  892.37   18.79
   1  -8   7  121.43    2.06
   5  -7   7   -0.12    0.28
  12  -5   3    0.28    0.69
  -8  -3  12  139.53    2.71
  -7   0  13   -0.28    1.06
   2  -9   4   69.24    1.62
   3  -4  11  230.14    3.77
 -13   0  10   20.00    1.62
 -10  -6   8    0.06    0.75
 -15  -3   1    4.02    0.87
   0   0  13   -0.19    1.15
  -5  -2  13   13.71    1.12
  -9  -4  11 1392.60   17.48
 -11  -7   2  244.07    3.74
  14  -2   3   57.05    1.40
  -1  -4  12   59.61    1.71
  -2  -2  13  412.67    6.14
   8  -3   9    2.06    0.90
  -5  -8   7   92.64    1.81
  13  -5   1  147.32    2.56
  13  -1   5  129.06    2.49
 -11  -6   7  384.41    5.58
 -16   0   3   -0.19    1.12
 -12  -4   9    0.22    0.78
   1  -6  10  102.36    2.03
   0  -7   9  381.95    5.45
  -9  -8   2  298.82    4.24
 -13  -5   6   15.86    0.90
 -11  -7   3  125.88    2.27
  11  -2   7    2.80    0.81
   9  -1   9  355.84    5.48
  13  -3   4    2.56    0.84
 -15  -3   5  161.37    3.02
 -14  -4   6  111.11    2.18
 -10  -1  12   16.14    1.00
 -14   0   9   -1.46    1.12
 -11  -7   1    1.62    0.69
  -5  -7   9    6.82    0.84
  -9  -8   1  104.54    1.90
  10  -7   2  316.08    4.71
  -7  -8   6   38.20    1.12
  -7  -1  13    1.22    0.93
  -9  -7   7    2.18    0.75
 -13  -1  10    0.78    0.87
 -16   0   4   81.86    2.43
  -8  -8   5    0.50    0.75
  -1  -9   5   74.66    1.50
   0  -1  13  450.72    6.67
 -16   0   2    0.81    1.12
  -6  -9   1   42.38    1.00
  -6  -4  12    2.46    0.81
   8  -8   2  233.07    3.24
  13  -4   3   68.67    1.68
  -2  -9   5    8.04    0.65
 -13  -3   9  131.68    2.37
   4  -6   9   -0.03    0.56
   6   0  11   -0.53    1.12
   3  -2  12   34.90    1.31
  12  -2   6    5.86    0.87
  15  -2   1    0.16    0.87
   1  -5  11  531.17    7.60
  11  -6   3   45.74    1.12
  -7  -5  11  204.96    3.21
  10  -2   8  160.81    2.84
  -9  -8   3    1.62    0.65
 -12  -3  10    4.95    0.90
  12  -6   1    1.53    0.62
 -16  -1   3  115.10    2.21
  -6  -9   2    3.71    0.59
 -12   0  11   -0.19    1.18
   4  -5  10   87.40    2.12
   4  -9   3  834.63   15.86
 -13  -4   8    7.10    0.87
  -6  -2  13   33.28    1.18
 -11  -4  10    0.59    0.81
   0  -9   5   21.94    0.72
   6  -5   9  100.52    2.46
  -1  -2  13  365.22    5.61
 -14  -1   9    4.74    0.84
 -10  -7   6   44.93    1.22
   6  -9   0    8.35    0.50
   2  -3  12  203.47    3.55
   5  -9   2   37.08    0.97
  -9  -6   9 1281.36   15.89
  14  -4   1   35.99    1.31
   4  -8   6    4.24    0.65
 -16  -1   4   43.00    1.34
  -3  -9   5    4.33    0.65
 -16  -1   2  118.75    2.27
  15   0   2   68.64    2.52
   6  -6   8    4.27    0.56
   9  -8   0  197.92    3.02
 -11  -7   4    7.48    0.78
  -5  -9   4   49.08    1.15
   6  -1  11   -1.28    0.84
   0  -4  12  254.94    4.14
  -7  -6  10 1724.88   21.50
   2  -8   7  141.65    2.34
   4   0  12    4.52    1.56
  -8  -7   8  354.68    5.17
 -11  -5   9  105.54    2.03
 -12  -1  11   73.19    1.90
  11  -7   0   -0.16    0.65
  15  -3   0  135.51    2.71
 -16   0   5    0.72    1.06
 -12  -5   8  164.33    2.77
 -15  -2   7 1109.58   16.58
   8  -7   5    3.99    0.44
   3  -9   4    3.12    1.06
 -16   0   1    1.06    1.09
  10  -5   6   41.07    1.22
   1  -7   9  325.36    5.02
  14   0   4  370.48    7.70
  -6  -9   3   13.15    0.78
  -8   0  13   -0.93    1.31
  -6  -8   7  691.11    9.16
  10  -4   7   81.73    1.84
  15  -1   2   29.41    1.09
   1  -9   5    1.03    0.41
  11  -4   6   51.57    1.43
   1   0  13   -0.12    1.06
  -6  -7   9  520.89    7.10
 -12  -6   6   19.04    0.90
   9  -5   7    1.74    0.75
 -14  -3   8    7.54    0.93
  13  -2   5  112.61    2.18
   8   0  10   45.09    1.96
   7  -7   6   32.00    0.75
  -9  -8   4   58.92    1.34
   9  -7   4    0.84    0.47
   4  -1  12   24.93    1.22
   6  -9   1   69.73    1.56
 -16  -1   5   40.76    1.25
 -14  -5   3  289.66    4.58
  -7  -4  12  105.85    2.15
 -15  -3   6  259.65    4.27
   9  -2   9   72.32    1.81
  -4  -9   5   -0.19    0.59
   5  -3  11   89.77    1.93
   2  -6  10   37.11    1.12
 -10  -2  12  133.67    2.71
 -16  -1   1    0.12    0.81
 -14  -5   2   97.75    2.03
  11  -5   5    0.19    0.75
 -15   0   8   77.40    2.56
  14  -1   4  577.22    8.79
  -7  -2  13   26.80    1.22
  -9  -3  12  427.53    6.14
 -11  -3  11    1.59    0.90
 -13  -2  10   41.88    1.28
  -8  -1  13  164.08    3.12
   4  -7   8  199.45    3.24
   0  -2  13  158.29    2.99
   1  -1  13  116.10    2.43
  -4  -3  13 1188.53   15.98
  -3  -3  13 3079.40   37.17
   8  -1  10   24.12    1.06
  -2  -8   8   14.68    0.84
   6  -4  10    5.11    0.93
   9  -4   8    0.22    0.81
   7  -8   4   43.12    2.06
 -16  -2   3   53.81    1.56
   7  -3  10  297.85    4.61
 -14  -5   4   14.93    0.93
   9  -8   1 1475.45   18.35
  -3  -8   8  116.16    2.21
  13  -5   2   16.67    0.87
 -10  -5  10   12.28    0.93
  12  -4   5    4.02    0.90
   2  -5  11  503.44    7.63
 -14  -2   9  134.67    2.56
 -13  -6   2   29.85    1.03
 -15  -1   8  441.65    6.76
 -11  -7   5   67.40    1.53
   6  -8   5 1029.31   19.32
 -13  -6   3  104.23    1.93
  -8  -5  11  103.29    2.06
  -1  -8   8   33.28    1.03
   4  -4  11    2.74    0.84
 -14  -4   7  484.24    6.67
 -16  -2   4   14.86    0.97
 -13  -5   7  227.99    3.65
 -14  -5   1   37.83    1.09
 -16  -2   2    0.16    0.87
  -5  -3  13   51.79    1.62
  14  -3   3   60.54    1.65
 -10  -4  11 1048.19   13.49
 -15  -4   3    9.29    0.90
  -2  -3  13 3149.72   44.78
   1  -4  12  356.18    5.45
   8  -5   8   23.56    1.06
   9  -6   6    0.84    0.56
   6  -2  11   50.73    1.56
   2  -9   5   14.05    0.56
 -11   0  12  929.79   20.00
 -16   0   6  456.05    9.82
  11  -7   1  142.43    2.46
  -8  -8   6    5.70    0.78
 -12  -2  11   19.82    1.09
  16   0   0  382.01    8.85
 -15  -4   2   33.50    1.15
   8  -8   3 1434.22   18.48
   6  -7   7    0.97    0.50
  -6  -9   4    4.52    0.72
  12  -6   2  182.59    3.15
  11  -3   7    9.72    0.84
   5  -9   3 2031.73   36.05
  10  -6   5   13.83    0.75
  10  -7   3  103.11    1.84
  -4  -8   8   71.85    1.78
   3  -8   7   43.12    1.40
   2  -7   9  123.36    2.27
 -13  -6   1   -0.16    0.69
 -15  -4   4  429.09    6.04
  -7  -9   1    0.16    0.53
  -8  -6  10 1341.28   16.67
 -13  -6   4   16.45    0.93
  15  -2   2  131.59    2.62
  -7  -9   2   64.31    1.37
  -5  -9   5   16.83    0.81
  -3  -6  11  182.81    3.18
   0  -8   8  120.99    2.21
  12  -5   4  119.03    2.68
   4  -9   4   73.94    2.59
   3  -3  12    0.37    0.87
  12  -3   6   82.17    1.84
   8  -6   7    0.28    0.56
  15  -3   1   81.73    1.90
  -7  -7   9 1769.18   22.22
 -11  -1  12   25.99    1.22
 -16  -1   6   22.87    1.03
  10  -3   8   -0.69    0.84
 -11  -6   8    5.05    0.87
   4  -2  12  291.77    4.64
  14  -4   2   11.22    1.00
   6  -9   2   56.55    1.28
  -9  -8   5   59.95    1.34
  16  -1   0  188.76    3.46
  -2  -6  11  120.90    2.21
  -7  -8   7 1009.09   13.02
  -4  -6  11   74.50    1.65
   5  -6   9    3.02    0.69
 -14  -5   5   23.84    1.00
 -16  -2   5    7.26    0.81
  -6  -3  13   40.69    1.31
   5  -8   6    4.27    0.65
  -1  -3  13 1900.89   27.79
 -16  -2   1   34.21    1.28
  -2  -9   6   29.76    0.93
   7  -9   0   12.96    0.59
  -9   0  13    1.43    1.25
 -10  -7   7  110.58    2.06
  -8  -4  12   77.46    1.74
  -1  -9   6   19.79    0.78
   0 -10   0   32.13    1.28
  12   0   7    1.34    1.34
  14  -2   4  120.27    2.34
  -8  -2  13   12.62    1.03
 -15  -4   1  448.60    7.91
   2   0  13   -0.41    1.03
   5  -5  10   84.50    1.96
   1  -2  13    0.81    0.87
  11   0   8 3149.72   55.59
  -3  -5  12   46.18    1.28
   8  -4   9   54.90    1.56
 -10  -6   9  441.00    6.14
   1 -10   0    3.99    0.65
  -9  -7   8   33.06    1.22
  -7  -9   3   11.78    0.78
   8  -2  10    8.91    0.90
  -4  -5  12   29.63    1.25
  14  -5   0   30.19    1.06
  -3  -9   6  117.22    2.09
  -5  -8   8   20.97    1.00
 -10  -8   2  156.67    2.56
   0 -10   1   80.27    1.56
  11  -6   4    1.74    0.65
  -1 -10   1    1.99    0.62
 -15  -3   7 2613.75   31.66
  -1  -6  11   46.49    1.34
  13  -4   4  185.65    3.27
 -15  -4   5   34.28    1.22
  -5  -6  11    0.09    0.84
   3  -6  10    4.21    0.65
   0  -9   6    3.52    0.53
  -2  -5  12    5.45    0.84
 -15  -2   8  380.45    5.86
  -9  -1  13   49.89    1.53
 -12  -6   7  359.89    5.20
 -10  -8   1  211.32    3.21
  12  -1   7    1.00    0.81
  15   0   3    0.84    1.03
   2  -1  13    1.93    0.93
  13  -6   0    5.08    0.75
   1 -10   1   30.01    0.90
   9  -8   2  119.87    2.03
 -10  -8   3    3.61    0.72
  13   0   6 2598.70   45.59
  11  -1   8   41.16    1.34
 -13  -6   5   95.50    1.93
  -3  -7  10    2.03    0.75
 -13  -4   9   -0.44    0.84
   1  -8   8  130.00    2.59
   3  -9   5   67.37    2.46
 -14   0  10   47.08    2.43
  13  -3   5   43.40    1.31
  -5  -5  12    7.07    0.90
  -2  -7  10   35.33    1.12
   5   0  12   30.19    1.96
 -12  -4  10   22.78    1.15
   2 -10   0    1.00    0.62
   7   0  11    0.06    1.28
   7  -5   9   61.91    1.68
 -12  -7   2  220.54    3.49
 -11  -7   6   25.11    1.09
  -2 -10   1   80.14    1.62
   9  -3   9   44.28    1.43
 -10  -3  12    2.46    0.87
   7  -6   8   90.14    2.09
   7  -9   1  102.17    2.03
   2  -4  12  266.07    4.27
 -12  -7   3 1660.81   20.44
  -4  -7  10    7.85    0.87
 -13   0  11   -1.18    1.06
  10   0   9    0.37    1.22
  -4  -9   6   25.49    1.00
  -7  -3  13  365.40    6.48
  15  -1   3  100.49    2.21
   3  -5  11  398.99    6.57
 -13  -3  10   40.94    1.28
   0  -3  13  692.39   10.28
  -1 -10   2  556.41    7.85
   0 -10   2  425.54    6.08
  -9  -5  11  289.03    4.33
  13  -1   6 3854.26   46.71
  -1  -5  12    1.71    0.87
 -16   0   7   -1.56    1.18
   5  -7   8  357.15    5.23
 -14  -1  10   23.24    1.22
  -6  -9   5   10.34    0.84
  -1  -7  10  156.79    2.68
  11  -7   2   36.33    1.03
 -11  -2  12  210.67    3.58
 -16  -2   6  561.30    8.16
   1  -9   6   48.73    1.15
  -4   0  14  238.12    5.52
  16   0   1   -0.87    1.15
   5  -1  12  205.56    3.65
   2 -10   1  156.98    2.59
 -12  -7   1  153.40    2.62
  10  -8   0  151.15    2.80
 -16  -3   3    6.92    0.90
 -12  -5   9    7.04    0.93
  16  -2   0   72.26    1.71
   7  -1  11    0.37    0.84
  15  -4   0   76.22    1.81
   0  -6  11   11.81    0.93
  -3   0  14  872.05   17.17
   3  -7   9   -0.03    0.56
  -6  -6  11   52.32    1.46
 -14  -5   6   57.21    1.40
 -14  -3   9   46.68    1.37
  -7  -9   4    7.51    0.72
  -2 -10   2  793.47   10.66
 -13  -1  11    0.22    1.00
  10  -1   9  132.02    2.56
 -10  -8   4   28.70    1.03
   1 -10   2   13.71    0.65
   4  -8   7   41.16    1.34
  -5   0  14    2.84    1.28
 -16  -3   4   24.30    1.56
  -6  -8   8  147.23    2.56
 -15   0   9    1.71    1.25
 -16  -3   2   57.89    1.59
  -6  -5  12   29.82    1.25
  13  -5   3   85.22    2.09
 -16  -1   7  848.18   11.22
  -8  -7   9  784.46   11.03
 -12  -7   4  829.05   10.81
  -5  -7  10   50.01    1.46
   6  -3  11   92.70    2.09
   9  -7   5   85.56    1.62
 -14  -4   8  202.04    3.30
  -3 -10   1    5.33    0.62
   3 -10   0   68.27    1.43
  -4  -1  14    1.74    0.84
  16  -1   1   -0.62    0.84
   8  -7   6   15.64    0.62
  -9  -6  10 2462.29   29.38
   6  -9   3 4036.23   69.58
 -12  -3  11    0.87    0.81
   5  -9   4  197.58    4.95
 -13  -5   8   51.26    1.34
  -2   0  14  718.41   14.05
  -3  -1  14    6.61    1.15
 -15  -4   6   58.21    1.56
 -11  -5  10  353.13    5.11
  -9  -8   6    7.10    0.84
   5  -4  11   15.58    0.97
  14   0   5   -0.19    1.34
  -9  -2  13   -0.06    0.97
  12  -6   3   78.93    1.62
   7  -8   5  280.03    4.74
  -8  -8   7  152.27    2.68
  14  -5   1   76.31    1.74
  12  -2   7   67.62    1.68
  -9  -4  12   21.09    1.12
  -5  -1  14    4.80    0.84
 -11  -4  11  707.47    9.44
   2  -2  13    0.25    0.81
   0  -7  10  320.63    4.99
 -15  -1   9    6.39    0.93
  15  -3   2    0.97    0.93
   2  -8   8   72.66    1.46
   8  -8   4  145.79    2.71
  -5  -9   6   12.90    0.84
  11  -2   8  319.38    5.11
  -6   0  14   21.97    1.65
   0  -5  12    1.00    0.87
  13  -6   1   65.56    1.62
  -3 -10   2  391.67    5.61
  -4  -4  13    4.05    1.09
  -3  -4  13  190.79    3.37
  12  -7   0  266.91    4.33
 -10   0  13    0.12    1.22
  -8  -9   2    6.73    0.65
  -8  -9   1  121.24    2.12
   4  -3  12  158.69    2.84
   2 -10   2   51.88    1.12
   7  -4  10   70.30    1.81
   3 -10   1   38.86    0.93
 -13  -6   6  104.54    2.09
  10  -7   4   46.93    1.06
 -16  -3   5  332.00    5.27
  -2  -1  14   22.93    1.18
  -1 -10   3    6.67    0.65
   3   0  13   -1.22    1.25
 -12   0  12 1304.35   32.34
 -16  -3   1   46.71    1.50
   2  -9   6  185.52    3.52
  14  -1   5    9.94    0.93
   0 -10   3   62.47    1.46
   7  -9   2  619.82    9.50
  14  -3   4   94.79    2.03
  15  -2   3    2.43    0.87
  -8  -3  13   10.53    1.12
   9   0  10  124.61    3.27
   7  -7   7   33.43    0.90
   4  -9   5 1258.08   23.81
  10  -5   7  150.03    2.93
  10  -8   1  203.69    3.30
  -5  -4  13   22.90    1.12
   6  -8   6   55.59    1.74
  13  -2   6  222.38    3.77
  11  -5   6   93.13    2.03
  14  -4   3    2.80    0.81
   1  -3  13  169.10    3.21
  -2  -4  13  403.73    6.33
  -2 -10   3    1.65    0.65
  -6  -1  14   27.11    1.18
   1  -6  11   34.84    1.18
 -14  -2  10   64.97    1.62
  -6  -7  10   24.58    1.09
   8  -3  10  107.56    2.24
  -1   0  14  194.46    4.89
  -7  -6  11  311.03    4.86
   5  -2  12   15.27    1.12
 -10  -1  13   24.74    1.12
  -8  -9   3   87.12    1.62
   4  -6  10    0.37    0.72
   7  -2  11    8.26    0.93
 -17   0   3   -0.84    1.09
   8  -9   0   34.68    0.93
  11  -4   7    6.98    0.84
  -7  -5  12   28.67    1.28
 -12  -7   5    0.31    0.78
   3  -1  13    3.80    0.97
 -12  -1  12   48.36    1.59
   6  -6   9   58.86    1.50
   9  -8   3  395.69    5.42
 -10  -8   5    3.96    0.75
  -4 -10   1   11.93    0.69
 -15  -3   8    9.72    0.93
 -13  -2  11   24.74    1.25
  10  -2   9  241.30    4.05
 -17   0   4  395.22    8.23
   1 -10   3   52.04    1.12
 -10  -7   8   51.72    1.37
   9  -1  10    0.90    1.00
   4 -10   0    3.49    0.56
 -16  -2   7 1608.25   21.19
   3  -4  12   37.36    1.28
  12  -4   6  322.93    5.23
  -7  -9   5    1.00    0.75
  15  -4   1   57.96    1.65
  -2  -8   9    0.62    0.65
  -7   0  14    1.74    1.53
 -17   0   2    1.56    1.18
  -7  -8   8  196.24    3.24
  -3  -8   9  104.88    2.03
  -1  -1  14    0.47    0.93
  -4  -2  14  367.27    6.23
  10  -4   8  207.92    3.77
   6  -5  10  186.86    3.49
   9  -5   8  108.09    2.15
  16  -2   1   17.51    1.00
 -11  -7   7    7.70    0.93
  -3 -10   3   25.61    0.90
   1  -7  10  381.11    5.95
 -11  -6   9   45.40    1.34
  -2  -9   7    2.21    0.69
 -17  -1   3   22.59    1.12
 -12  -6   8   51.72    1.43
  -4 -10   2  403.17    5.76
  -3  -2  14  622.72    8.63
  -6  -4  13   31.78    1.18
  12  -5   5  264.10    4.58
  -1  -4  13  280.09    4.71
  10  -6   6   37.95    1.09
   3 -10   2   12.65    0.72
  -1  -9   7    2.59    0.59
 -17  -1   4  329.23    5.17
  -5  -2  14  149.25    2.96
   4  -5  11    1.06    0.90
 -14  -5   7  101.83    1.99
  -3  -9   7    3.46    0.72
 -15  -2   9  495.87    7.26
  -1  -8   9  210.60    3.49
 -16   0   8    1.84    1.18
  -6  -9   6   63.75    1.53
 -10  -5  11  102.58    2.03
 -15  -5   3  132.40    2.46
   1  -5  12   43.25    1.56
  -4  -8   9   87.43    1.93
   4  -7   9   77.31    1.62
   9  -6   7    8.88    0.78
 -17   0   5   -0.47    1.28
 -11  -3  12   64.69    1.59
 -16  -3   6  320.41    5.08
  -7  -1  14    7.29    1.03
 -17  -1   2   78.05    1.74
  11  -7   3   13.93    0.78
  16   0   2  367.74    8.23
  12  -7   1   18.26    0.87
   4 -10   1  100.52    2.18
  16  -3   0   21.13    1.09
 -15  -5   2   12.87    1.00
 -14  -6   3   18.82    1.00
  -2  -2  14  601.81    8.66
   3  -8   8    1.25    0.50
   2 -10   3    8.54    0.69
 -15  -4   7 1025.35   13.40
  -8  -9   4   28.23    1.03
 -14  -6   2   -0.65    0.78
  11  -6   5    3.71    0.72
   8  -9   1   22.19    0.93
  14  -2   5   86.44    1.87
  -9  -7   9  863.86   11.28
   5  -8   7   34.77    1.25
 -15  -5   4    7.10    0.87
   0  -9   7    2.90    0.53
   0   0  14   11.65    1.53
  15   0   4  461.68   10.28
   3  -9   6  523.57    9.22
   6  -7   8  300.41    4.55
 -16  -1   8  537.37    7.76
 -11  -8   2  138.81    2.43
   6   0  12  150.56    4.18
  -4  -9   7   36.89    1.12
 -17   0   1    0.41    1.25
  -6  -2  14   60.01    1.68
 -17  -1   5   65.37    1.65
  -1 -10   4  191.72    3.21
  -7  -7  10   93.98    1.87
  13  -4   5  482.78    7.67
  16  -1   2    5.83    0.93
 -10  -2  13   26.52    1.15
  14  -5   2    6.67    0.84
  -4 -10   3   23.18    0.90
 -14  -6   4   51.97    1.31
   0  -8   9  880.68   11.93
 -11  -8   3  232.85    3.52
  -2 -10   4  921.00   12.06
   6  -9   4  392.54    8.23
  13  -6   2   -0.31    0.65
   3  -2  13  108.37    2.31
   9  -4   9   22.00    1.15
 -10  -6  10 1872.73   23.34
 -12  -2  12  229.33    3.58
   2  -6  11   40.20    1.28
   0 -10   4   15.24    0.72
 -10  -4  12  161.53    2.77
 -11  -8   1  536.12    7.29
  -5  -8   9    2.34    0.75
  10  -8   2   35.30    0.90
  -9  -3  13   45.84    1.65
  -8  -6  11  600.72    8.32
  -8  -5  12  197.42    3.18
  12  -3   7    5.89    0.81
  -7  -4  13   25.58    1.15
   0  -1  14    6.20    1.03
  15  -1   4  655.96    9.88
  -9  -8   7  222.32    3.43
 -13  -4  10   11.93    0.97
 -15  -5   1    0.87    0.84
   9  -2  10    1.31    0.81
   2  -3  13   35.05    1.28
 -13  -6   7  120.68    2.24
 -14  -6   1   13.83    0.90
   0  -4  13   52.38    1.56
  -5 -10   1   77.12    1.56
   7  -9   3 5825.42   98.96
  11  -3   8   10.72    0.97
   6  -1  12 1230.01   16.27
 -12  -7   6   35.15    1.12
  -8   0  14   46.33    2.21
   8  -6   8   32.06    1.09
   8  -5   9  176.08    3.27
 -17  -1   1   -0.34    0.72
  -1  -2  14  305.02    5.05
 -16  -4   3    8.60    0.87
   5  -9   5 3989.71   69.67
   5 -10   0  151.78    2.40
 -17  -2   3    1.93    0.90
   8   0  11   -0.41    1.50
  -5 -10   2   87.62    1.68
  13  -5   4    1.87    0.78
  -3 -10   4 1928.35   23.77
 -15  -5   5    0.65    0.84
   2  -7  10  387.65    5.98
 -14  -4   9   61.41    1.65
 -10  -8   6   -0.81    0.75
   1  -9   7    0.28    0.44
 -17   0   6  106.35    3.30
 -11   0  13   -2.21    1.59
 -17  -2   4   67.90    1.71
  15  -3   3    5.36    0.84
 -14   0  11   -0.50    1.12
   1 -10   4  132.64    2.21
   4 -10   2   62.54    1.56
 -16  -4   4   92.20    1.90
 -16  -4   2   60.26    1.62
   4   0  13    1.34    1.18
  13  -3   6   70.95    1.65
 -11  -8   4  292.18    4.18
  -8  -1  14   13.59    1.06
   3 -10   3   58.98    1.40
  12  -6   4  222.69    3.65
 -13  -5   9   14.15    1.03
   6  -4  11   26.02    1.37
  -5  -9   7   41.63    1.18
 -14  -3  10  177.83    3.08
  -7  -2  14   15.42    1.06
 -17  -2   2   -0.22    0.84
 -15   0  10   24.55    1.84
   5  -3  12   72.10    1.81
 -12  -5  10  131.71    2.37
  -8  -8   8  206.21    3.27
 -12  -4  11  394.82    5.95
  11  -8   0   15.55    0.81
   7  -3  11   85.41    1.99
  -9  -9   2    2.93    0.69
 -14  -6   5  277.00    4.21
   8  -1  11    1.00    1.12
  12   0   8 6446.64  105.04
   8  -8   5    5.30    0.78
 -17  -1   6   29.13    1.15
  -9  -9   1   44.68    1.18
 -13  -7   2   77.21    1.71
 -11  -1  13   19.47    1.06
   1  -8   9 1589.21   20.07
   2  -5  12  102.26    2.34
 -13  -7   3  799.95   10.81
 -13  -3  11   20.69    1.12
  10  -3   9   82.73    1.87
  -7  -9   6   87.18    1.84
 -14  -1  11   16.33    1.06
  -8  -9   5   33.06    1.09
  13   0   7    0.37    1.22
  15  -4   2    6.73    0.87
   4  -1  13    3.30    0.97
 -16  -2   8 1051.96   15.89
   5  -6  10   38.58    1.18
   8  -9   2 1254.47   17.73
   5 -10   1    1.06    0.59
  -6  -8   9  155.27    2.80
 -16  -3   7 3358.49   40.57
  -3  -6  12    2.90    0.84
   9  -7   6    1.28    0.56
   1   0  14  391.11    8.82
  17   0   0 1075.46   20.97
 -17  -2   5    2.52    0.81
  -5 -10   3    5.67    0.81
 -15  -1  10   15.27    1.03
   7  -8   6   32.53    1.50
  -4  -3  14  519.89    7.51
  -4  -6  12   66.74    1.71
  16  -2   2    1.93    0.97
  14  -6   0    0.44    0.75
  16  -3   1   45.62    1.40
  -9  -9   3  175.27    2.93
   9  -8   4  286.66    4.14
   4  -4  12  102.42    2.37
  -4 -10   4 2165.78   25.86
  15  -5   0  149.31    2.71
  12  -7   2  202.69    3.52
 -16  -4   5    7.48    1.03
  -3  -3  14  962.63   13.40
  10  -7   5   40.07    1.09
  12  -1   8  144.48    2.90
 -16  -4   1  449.44    7.45
  -2  -6  12    8.66    0.84
 -13   0  12  812.69   15.11
  11   0   9    0.97    1.37
 -13  -7   1    5.80    0.81
  14  -4   4  490.48    7.67
   0  -2  14   23.00    1.18
   4  -9   6  605.61   12.12
  15  -2   4  320.28    5.39
  -5  -3  14  136.45    2.62
   2 -10   4   75.81    1.65
  -8  -7  10  138.25    2.56
 -13  -7   4  442.52    6.17
  -8  -4  13  241.73    3.89
  13  -1   7  178.76    3.33
   4  -8   8    0.84    0.90
 -15  -3   9    8.32    0.97
   9  -9   0  462.15    6.86
   1  -4  13    1.34    0.97
   6  -2  12    9.41    1.00
  -3  -7  11   32.50    1.18
   1  -1  14   56.93    1.62
  17  -1   0  691.36   10.10
 -17  -2   1  118.09    2.37
   8  -7   7  136.63    2.49
 -14  -5   8  126.79    2.43
  -5  -6  12  171.03    3.02
   8  -4  10   79.21    1.90
   2  -9   7    5.70    0.90
 -11  -7   8  203.03    3.21
  -2  -7  11  411.89    6.17
  -4  -7  11   31.10    1.15
   5  -7   9   56.49    1.31
   7  -6   9   35.86    1.12
  -2  -3  14 1119.14   16.95
 -15  -5   6  178.67    3.05
   5  -5  11   74.66    1.78
  14   0   6 2997.67   53.41
 -13  -1  12   58.42    1.87
 -15  -4   8  581.18    7.91
  14  -3   5   -0.34    0.93
 -11  -8   5  519.49    7.07
  -9   0  14  514.16   10.87
  11  -1   9    2.56    0.97
  -9  -5  12  774.21   10.25
 -11  -5  11   58.61    1.53
   3  -6  11    3.05    0.81
  -6  -9   7   14.30    0.93
  -1 -10   5   15.36    0.78
  -6 -10   1  110.96    1.90
 -16   0   9   -1.22    1.22
  -9  -6  11 1152.42   14.99
  -2 -10   5    4.42    0.72
  -1  -6  12   12.96    0.90
  -8  -2  14   68.83    1.74
  -6  -3  14    0.44    0.87
 -10  -7   9   92.48    1.93
  -4  -5  13  195.43    3.40
  -3  -5  13  474.43    6.92
  11  -8   1    3.08    0.65
 -17   0   7   -0.59    1.31
  -9  -9   4    3.24    0.78
 -10  -3  13  185.27    3.18
 -12  -6   9   72.07    1.71
  -6 -10   2   28.98    0.93
  16   0   3    0.53    1.28
   7  -5  10    0.22    0.84
  11  -7   4   57.58    1.31
   4 -10   3   53.13    1.96
   6  -8   7   16.14    1.00
   8  -2  11   45.49    1.46
   3  -3  13   64.66    1.65
  10  -8   3  219.55    3.27
 -12  -3  12   10.03    1.09
  -1  -7  11 1176.16   15.27
   0 -10   5   21.03    0.81
 -14  -6   6  392.01    5.52
  -5  -7  11   72.23    1.65
   3  -7  10  232.29    3.83
   6 -10   0  142.65    2.52
 -17  -2   6  153.93    2.93
  14  -1   6 5036.88   61.13
 -11  -2  13   15.30    1.34
  -9  -1  14   20.32    1.22
   5 -10   2  203.97    3.61
   2  -8   9 1140.30   14.96
 -12  -7   7    2.77    0.90
 -14  -2  11   64.66    1.68
   9  -3  10    2.62    0.87
  13  -7   0   72.32    1.59
  -3 -10   5  181.60    3.08
   4  -2  13   17.92    1.18
 -16  -1   9    2.59    1.12
  -6  -6  12  164.36    3.05
  -5  -5  13    1.43    0.90
  13  -6   3   12.84    0.84
  14  -5   3  422.46    6.51
  -2  -5  13  327.64    5.20
  -5 -10   4 1379.01   17.51
 -13  -7   5  103.42    1.90
  -7  -8   9  320.10    4.92
 -11  -4  12  228.77    3.65
 -16  -4   6   75.47    1.84
 -15  -2  10   -0.41    0.93
  -2  -9   8   47.21    1.28
  -1  -3  14  712.80   10.87
 -17  -1   7  783.31   10.38
  10   0  10    2.74    1.34
   7  -9   4  527.24   10.66
  16  -1   3    0.59    0.93
  16  -4   0   59.14    1.90
   9  -9   1   63.81    1.28
 -17  -3   3    4.27    0.87
 -13  -6   8   86.47    1.84
  11  -5   7  628.14    8.97
  -3  -9   8   52.63    1.34
 -11  -6  10  544.97    7.67
  12  -2   8  793.34   11.00
   3 -10   4   17.17    1.56
   7  -7   8   61.10    1.37
   6  -9   5 5312.82   90.05
 -10  -8   7  443.71    6.26
 -17  -3   4    0.34    1.00
  14  -6   1    1.12    0.69
  -1  -9   8   15.86    0.81
  -6 -10   3   15.58    0.84
  13  -2   7  143.74    2.74
   1 -10   5   33.46    0.87
   1  -2  14  121.43    2.65
  17  -2   0  161.44    2.96
   3  -5  12   88.40    1.99
  12  -5   6  881.87   12.43
   0  -6  12    2.06    0.78
  15  -5   1   20.50    1.00
   2   0  14  523.19   11.09
  17   0   1    0.31    1.50
  -7  -3  14   10.66    1.00
 -17  -3   2   30.22    1.25
  -9  -8   8   52.72    1.53
  -8  -9   6   20.78    0.97
  10  -5   8  390.64    6.01
  10  -1  10    7.17    1.03
   8  -9   3 5245.36   90.98
   6 -10   1  199.48    3.55
   0  -7  11 1545.87   19.88
  -6  -5  13  229.24    3.68
  -4  -9   8    7.17    0.81
   7   0  12  579.19   11.72
  -4 -10   5  373.75    5.45
  -6  -7  11    3.96    0.84
  -1  -5  13   85.53    1.99
   3  -9   7   19.44    0.97
 -13  -2  12   56.71    1.62
  -9  -4  13  392.67    5.86
  11  -2   9  379.46    5.86
  12  -4   7    0.41    0.87
 -12   0  13   -1.40    1.74
   2  -4  13    0.50    0.90
  15   0   5    0.31    1.31
  10  -6   7    0.75    0.78
 -16  -3   8   22.56    1.09
  11  -6   6   13.71    0.90
  11  -4   8  356.99    5.48
   0  -9   8    7.23    0.65
  -3  -8  10   21.13    1.03
   5   0  13   -0.06    1.22
 -17  -3   5  237.68    5.20
   2  -1  14   84.29    2.03
  17  -1   1   29.35    1.25
  -2  -8  10  131.52    2.43
  16  -3   2    4.64    0.93
  -9  -7  10   37.92    1.25
  -9  -9   5   33.96    1.06
  -7  -9   7    0.28    0.81
 -12  -8   2   46.18    1.22
 -11  -8   6   -0.22    0.84
  -7  -6  12    5.11    0.87
   5  -9   6  455.48   10.16
 -15  -5   7   39.39    1.25
   7  -1  12 2224.92   28.23
  14  -2   6  334.68    5.14
  -9  -2  14    2.99    0.87
 -12  -8   3  469.76    6.54
  -4  -8  10    9.35    0.87
  12  -7   3   75.25    1.59
   0  -3  14  278.28    4.80
  15  -3   4    8.41    1.03
  15  -4   3    4.52    0.84
 -12  -1  13    1.90    0.87
  15  -1   5   12.21    1.00
 -16  -2   9 1671.28   22.12
  13  -4   6  230.52    3.68
   5  -8   8    0.93    1.03
   6  -3  12   37.55    1.37
 -10   0  14 1778.88   31.97
 -17  -3   1   61.41    1.74
   5  -1  13  110.09    2.46
  13  -7   1    1.22    0.69
 -14  -4  10    0.06    0.93
  -1  -8  10  201.63    3.30
   2 -10   5   -0.31    1.25
  11  -8   2   54.15    1.28
  13  -5   5  494.59    7.54
 -17  -2   7 1708.67   22.65
   6  -6  10   32.53    1.06
   9  -6   8   17.26    0.93
   5  -4  12  117.63    2.43
 -12  -8   1   42.25    1.15
  -5  -9   8   11.78    0.87
 -10  -9   2  316.61    4.64
  16  -2   3   11.03    1.00
  -4   0  15   -0.90    1.46
   7  -4  11    0.50    0.93
 -13  -7   6  204.56    3.27
  -6 -10   4  305.36    4.55
   5 -10   3  361.10    7.95
   3  -8   9  984.13   13.15
   9  -5   9  241.67    3.99
  12  -6   5  181.07    3.15
 -10  -5  12 1280.08   16.70
 -13  -4  11   79.77    1.78
  10  -4   9  272.24    4.33
  -5   0  15   -0.93    1.43
  -7 -10   1   57.11    1.22
 -10  -9   1  125.88    2.18
  -7  -5  13  159.29    2.87
   4  -6  11   28.48    1.09
 -14  -6   7    0.59    0.97
  -3   0  15    0.12    1.74
 -13  -5  10    1.50    1.03
   0  -5  13    9.69    1.18
  -7 -10   2   19.10    0.84
   9  -9   2 1196.39   17.60
  -5 -10   5  186.14    3.21
 -17   0   8    0.00    1.12
 -10  -9   3 2137.86   25.64
 -16  -4   7 1231.38   15.55
 -10  -6  11 1200.00   15.55
 -15  -6   3    2.18    0.81
   1  -6  12   41.88    1.31
  -8  -8   9  174.21    2.96
 -12  -8   4  276.82    4.33
  -8  -3  14  158.32    3.24
  -5  -8  10   96.47    2.15
 -10  -1  14  125.42    3.05
   4 -10   4  200.98    4.92
   1  -9   8   17.26    0.87
   1  -7  11  957.77   12.90
   9  -8   5   56.52    1.09
  -7  -7  11  347.24    5.05
  -4  -4  14    1.96    1.06
 -18   0   3    0.22    1.18
  10  -2  10   12.37    1.06
  16  -4   1   13.24    1.03
   8  -8   6    4.77    0.81
   9   0  11   -0.87    1.50
 -16  -5   3   30.85    1.18
   6 -10   2   98.40    2.03
 -18   0   4   84.07    3.02
 -15  -6   2   27.26    1.06
   4  -7  10  103.67    2.03
  -4  -1  15 1271.23   16.73
   8  -3  11   31.44    1.37
  -3  -4  14    1.90    0.90
   6  -7   9    5.61    0.62
 -14  -5   9  232.32    3.80
 -17  -3   6  118.78    2.46
  -2 -10   6    0.56    0.72
   7 -10   0    0.53    0.53
 -11  -3  13  464.15    6.54
 -15   0  11   -2.06    2.37
  -5  -1  15  209.17    3.68
 -15  -6   4    4.99    0.97
  -1 -10   6   30.32    1.00
  -5  -4  14   11.06    1.31
 -14  -3  11   32.25    1.31
  -3  -1  15 2001.45   26.02
  -6   0  15    1.09    1.28
 -16  -5   4    8.32    1.00
   0  -8  10   96.28    2.09
 -15  -4   9  401.17    6.04
 -16  -5   2    0.84    0.81
   4  -3  13    1.09    1.06
 -17  -1   8  302.15    4.77
  -2   0  15   -0.81    1.46
   6  -5  11  136.60    2.71
   2  -2  14  268.31    4.30
  17  -2   1   66.03    1.71
  -7 -10   3   66.31    1.50
 -15  -3  10  175.33    2.99
  12  -8   0    1.12    0.72
 -18  -1   3   31.07    1.28
 -18   0   2   62.47    2.52
  10  -9   0  235.53    4.02
  -3 -10   6   19.26    0.87
   9  -1  11    0.47    0.93
  14  -6   2  116.91    2.46
 -11  -7   9   70.70    1.65
 -12  -5  11    0.90    0.93
 -18  -1   4  262.98    4.33
  10  -8   4   11.87    0.65
 -12  -7   8  104.88    2.12
  -2  -4  14   13.09    1.09
   7  -2  12  276.35    4.52
  12  -3   8    1.43    0.97
 -14   0  12   39.51    1.99
 -18   0   5   -0.50    1.22
   0 -10   6   39.17    1.09
  10  -7   6    1.28    0.62
  14  -4   5  160.56    2.99
 -15  -1  11    0.69    1.00
  -8  -6  12   16.64    1.12
 -10  -9   4   24.58    0.97
   4  -9   7    0.72    0.69
 -12  -2  13    1.15    1.00
  -6  -1  15  207.68    3.68
 -15  -6   1   14.86    0.93
  13  -3   7   44.46    1.43
  15  -2   5   79.27    1.84
   7  -8   7   60.85    1.65
  -6  -9   8   84.07    1.81
  15  -5   2  194.43    3.61
   3   0  14   12.00    1.74
  -2  -1  15  900.37   12.56
   1  -3  14   73.16    1.81
 -16   0  10    0.72    1.34
   8  -6   9   20.47    0.97
  17  -3   0    7.82    1.00
   5  -2  13   90.83    2.31
  -6  -4  14   67.49    1.78
   9  -7   7   30.35    1.00
   3 -10   5  234.78    5.36
  -6  -8  10  269.87    4.39
 -18  -1   2 1098.17   14.08
 -10  -4  13   68.64    1.78
   4  -5  12    9.53    1.00
  17   0   2  916.08   18.13
 -16  -5   5    7.17    0.93
 -14  -7   3  327.73    5.05
 -12  -8   5 1904.04   24.62
   3  -4  13   27.67    1.34
 -12  -4  12  215.65    3.58
  -9  -9   6    6.76    0.84
  13  -6   4  787.27   10.84
 -14  -1  12   41.75    1.62
  16   0   4  101.67    3.58
 -15  -6   5  185.71    3.08
 -18  -1   5    1.18    0.97
 -16  -5   1    0.78    0.87
 -14  -7   2    5.23    0.84
  11  -7   5   33.56    1.06
 -13  -3  12   14.93    1.15
   7 -10   1  834.69   13.59
  11  -3   9  168.70    3.08
  -7   0  15   -0.06    1.34
   7  -9   5 3148.26   54.93
  -8  -9   7   68.55    1.59
  -4 -10   6   15.67    0.87
   0 -11   0   -0.97    1.03
  14  -5   4  179.07    3.52
  -8  -5  13   73.22    1.74
 -10  -8   8   74.88    1.74
   9  -4  10  190.16    3.52
   2  -9   8  384.57    5.95
   8  -9   4  471.31    9.69
   1  -5  13    4.49    1.00
   3  -1  14    3.68    0.97
  -1   0  15    1.62    1.62
 -10  -2  14   -0.22    0.84
 -13  -6   9   44.74    1.40
 -16  -1  10    0.62    0.93
  -6 -10   5  124.73    2.34
   1 -11   0   57.15    1.37
   8  -5  10  194.28    3.58
  -1  -4  14    6.73    0.93
   1 -10   6   19.72    0.69
 -12  -6  10    3.24    0.90
 -11  -8   7  399.80    5.73
   0 -11   1  120.18    2.21
   1  -8  10    7.82    0.72
 -18   0   1    0.56    1.25
  17  -1   2    7.32    0.97
 -14  -7   4  663.47    8.88
  -4  -2  15 1757.53   22.72
 -17  -4   3    6.98    1.00
  -1 -11   1    0.78    0.69
  13  -7   2   12.90    0.81
 -10  -7  10   29.01    1.22
  16  -1   4  256.84    4.61
   2  -7  11  324.87    5.23
  -7 -10   4   39.91    1.18
  14  -3   6   82.54    1.84
 -15  -5   8  585.29    7.85
   2  -6  12   47.95    1.37
  -9  -3  14    0.34    0.97
  -7  -1  15   60.42    1.68
 -17  -4   4    0.41    0.87
  -8  -7  11  773.31   10.16
  -5  -2  15 1132.76   15.67
  -3  -2  15 1264.06   16.70
  13   0   8 6110.96  106.19
 -18   0   6    9.10    1.59
 -13  -7   7   24.15    1.15
 -14  -7   1   13.83    0.97
   1 -11   1    0.12    0.62
  10  -9   1   29.73    0.93
 -16  -3   9   14.58    1.09
 -17  -2   8 1025.01   13.30
   6  -9   6  537.74   11.28
  -1  -1  15  103.11    2.24
   8  -7   8   50.95    1.22
   4  -8   9  339.39    5.30
  -7  -4  14  242.54    4.18
 -17  -4   2   10.59    1.09
  11  -8   3    2.40    0.62
 -11   0  14 1144.04   21.22
 -17  -3   7 2543.77   32.97
 -18  -2   3   13.02    1.06
  12  -8   1    3.86    0.72
   2 -11   0  325.24    4.80
   9  -2  11   44.28    1.50
   6 -10   3 1304.45   25.89
  16  -3   3   62.41    1.59
 -18  -2   4    9.35    0.97
 -18  -1   1    0.19    0.93
   5 -10   4  416.22    9.22
  12   0   9    1.87    1.56
  15  -6   0    9.07    0.87
  -2 -11   1   57.55    1.31
   9  -9   3 1552.91   23.99
 -10  -9   5  119.93    2.09
 -15  -2  11   43.69    1.50
  -9  -8   9  226.53    3.58
 -13   0  13    0.06    1.78
  14   0   7    4.24    1.53
  -6  -2  15  343.65    5.58
  13  -1   8   11.15    1.09
 -18  -1   6   -0.53    0.90
   6  -8   8   -0.16    0.97
 -16  -4   8  766.20   10.25
  -1 -11   2  390.74    5.58
   0 -11   2  130.46    2.31
  -5 -10   6   28.57    1.06
  -2  -2  15  897.88   12.37
   6   0  13    2.77    1.62
  12  -7   4   24.09    0.97
 -17  -4   5    1.22    0.87
  -7  -8  10  801.76   10.75
 -14  -6   8  156.67    2.71
 -11  -5  12 1278.27   16.08
 -16  -5   6  262.80    4.21
  -2  -9   9  204.53    3.52
  -7  -9   8    1.09    0.81
  -3  -9   9   89.36    1.93
 -11  -1  14  126.32    2.49
 -18  -2   2    3.80    0.87
  16  -4   2    2.52    0.87
  10  -3  10   44.81    1.46
   2 -11   1    3.83    0.65
  -8 -10   2   19.13    0.87
  -8 -10   1   10.19    0.69
  -8   0  15    0.19    1.34
  16  -5   0  161.22    3.21
  12  -1   9   30.69    1.31
 -14  -7   5   53.72    1.34
 -15  -6   6  367.46    5.39
 -14  -2  12    2.18    0.97
   5  -6  11   83.85    1.90
 -18  -2   5    2.03    1.00
   2 -10   6  102.73    2.03
  -2 -11   2  695.04    9.57
 -13  -1  13   21.78    1.22
  14  -1   7   23.90    1.28
   0   0  15   -0.44    1.34
   7 -10   2   15.86    0.62
   1 -11   2   22.90    0.81
   0  -4  14    0.12    1.03
  -9  -6  12  324.80    4.92
  15  -4   4  517.86    7.54
 -17   0   9   -2.15    1.56
 -11  -6  11  999.37   12.99
   8   0  12  830.36   16.08
   4 -10   5  902.96   17.20
  -1  -9   9  992.20   13.06
   5  -7  10    1.81    0.72
   3  -2  14    5.61    1.00
   6  -4  12   11.65    1.06
 -12  -8   6  101.98    1.99
   6  -1  13  192.44    3.58
  -4  -9   9  459.57    6.70
  -3  -7  12  722.05   10.03
 -16  -2  10   19.97    1.18
 -17  -4   1   68.46    2.31
  -3 -11   1    1.12    0.69
   2  -3  14    3.89    1.00
  17  -3   1  211.13    3.71
  -4  -6  13    1.84    0.90
  -3  -6  13  141.81    2.71
   3 -11   0  591.84    8.10
  -4  -7  12  285.89    4.71
  14  -7   0    3.40    0.93
  -8  -1  15    0.72    1.00
   7  -6  10  158.19    3.49
  -8 -10   3    3.58    0.75
  17  -2   2  133.67    2.77
   8 -10   0   90.70    1.81
  11   0  10   76.12    2.74
   3  -9   8  511.20    8.35
   7  -3  12   -0.03    1.00
  16  -2   4   80.89    1.96
  18   0   0 1749.43   32.25
   2  -8  10    2.12    0.72
  -2  -7  12 1041.53   14.08
  -9  -5  13  152.68    2.62
   5  -9   7   20.50    0.90
  -7  -2  15    2.74    1.03
   0  -1  15    3.68    1.22
  12  -5   7  181.35    3.24
 -17  -1   9    0.97    1.09
 -12  -3  13  593.18    8.16
   8  -1  12 2227.50   29.10
   2  -5  13  153.96    3.21
  15  -3   5    0.69    0.93
  -5  -6  13   17.32    1.09
 -11  -9   2  210.70    3.27
  14  -6   3    0.37    0.75
  -2  -6  13  434.83    6.39
  -1  -2  15  429.78    6.73
  11  -5   8  340.23    5.52
  -8  -4  14   25.18    1.22
  15   0   6 1067.64   21.16
   5  -3  13   10.19    1.00
  -7 -10   5   91.14    1.84
  -3 -11   2  597.23    7.91
  -5  -7  12   34.06    1.31
 -18   0   7    0.25    1.22
   2 -11   2   29.69    0.84
 -18  -2   1  493.00    7.54
  -2 -10   7   26.39    1.03
   0  -9   9 1578.96   20.28
   3 -11   1    0.34    0.53
   7  -7   9   20.28    0.84
  11  -1  10   43.47    1.50
 -11  -9   3 2395.73   28.98
  11  -6   7  132.15    3.05
   8  -4  11  148.07    2.77
  -1 -11   3    6.04    0.78
  18  -1   0 1292.36   17.85
   4   0  14 1092.63   24.27
 -11  -9   1  601.99    8.35
 -17  -4   6  137.07    2.62
  -5  -9   9  265.29    4.27
 -13  -8   2   -0.75    0.72
 -11  -4  13  102.51    2.06
  10  -9   2  399.06    5.67
 -13  -8   3  205.77    3.30
  -1 -10   7    2.09    0.62
   0 -11   3   21.28    1.00
  15  -5   3  702.70   11.03
 -14  -4  11   86.28    1.90
   3  -7  11   57.05    1.43
  -9  -9   7   24.40    1.12
  13  -2   8  742.21   10.34
  -3 -10   7   25.27    1.00
 -18  -2   6   24.86    1.18
   4  -4  13   15.14    1.18
  -6 -10   6   66.84    1.59
  -9  -7  11 3786.65   44.74
  13  -5   6  450.56    7.04
  -1  -7  12  829.08   11.40
  -2 -11   3    7.45    0.72
  15  -1   6 3765.89   46.49
 -10  -3  14    7.70    1.12
   9  -8   6   40.44    1.09
   3  -6  12   26.95    1.15
  12  -6   6  105.72    2.15
  15  -6   1    0.47    0.81
 -14  -5  10   77.74    1.84
 -15  -4  10  100.36    2.12
 -11  -2  14  112.64    2.34
  10  -6   8  181.22    3.83
 -18  -1   7  180.94    3.08
   5  -5  12    7.85    0.97
 -12  -7   9  427.97    6.04
  -4  -3  15 3693.04   45.27
   7  -5  11   36.43    1.25
  12  -2   9   44.03    1.50
  12  -8   2   15.27    0.78
  -6  -6  13   16.45    1.15
  10  -8   5   23.40    0.81
  12  -4   8  500.63    7.14
  -8 -10   4    3.33    0.81
  -1  -6  13  377.52    5.48
 -14  -7   6  301.90    4.55
 -10  -9   6   63.28    1.53
   4  -1  14   19.69    1.22
   8 -10   1 1930.00   27.30
  -4 -11   1   13.96    0.78
 -13  -5  11   34.65    1.31
  17   0   3   -0.50    1.22
 -13  -8   1   19.79    0.97
  10  -5   9  310.97    4.95
 -13  -2  13    7.20    1.06
  14  -2   7  334.18    5.48
  -5  -3  15 1484.92   19.44
   1 -11   3   91.86    1.68
   0 -10   7  107.09    1.96
  -9   0  15   -0.47    1.31
  -8  -8  10 1249.26   16.42
 -13  -8   4  120.65    2.27
  -3  -3  15 3996.32   61.07
   3 -10   6   42.75    1.93
  13  -4   7  416.78    6.48
   4 -11   0   86.34    1.71
  -6  -7  12   46.02    1.43
  13  -7   3   64.37    1.50
 -17  -3   8    2.93    1.00
 -16  -5   7   19.16    1.09
 -11  -9   4    3.21    0.78
  -3  -8  11  276.16    4.39
   6  -2  13   39.54    1.53
   1  -4  14    0.47    0.97
  -4 -10   7   11.31    0.90
  17  -4   0  101.45    2.24
   8  -8   7  316.51    5.67
  -4  -5  14  801.16   11.34
 -18  -3   3   43.00    1.37
  16  -5   1  471.44    7.67
   1   0  15   -0.47    1.62
 -11  -8   8  106.10    2.12
  -3 -11   3  119.71    2.24
   9  -3  11   17.14    1.25
  -8  -9   8   45.37    1.37
  -8  -2  15   17.57    1.15
 -18  -3   4   54.12    1.65
  11  -9   0  474.65    6.57
  -2  -8  11  508.05    7.17
  -4  -8  11   69.83    1.68
 -13  -7   8   51.97    1.50
   5  -8   9  166.36    2.80
   6 -10   4  304.58    6.39
  -4 -11   2  208.11    3.30
  -3  -5  14  888.44   12.25
 -11  -7  10  155.48    2.74
 -15  -6   7  155.05    2.84
   8  -9   5  402.64    8.97
 -13  -4  12  167.17    3.21
   1  -9   9 1618.97   20.50
 -15  -3  11   12.87    1.09
  11  -4   9  415.69    6.39
   3 -11   2    0.47    0.62
  17  -1   3    0.31    0.97
  14  -7   1    0.81    0.78
   0  -2  15  113.14    2.56
  -9  -1  15   29.23    1.34
 -17  -2   9 3368.12   46.12
  -5  -5  14  286.48    4.92
   8  -2  12  245.44    4.33
  -6  -3  15   76.74    2.06
 -15  -5   9  424.98    6.14
  10   0  11   -0.47    1.59
   7 -10   3 2809.00   49.20
  -6  -9   9    7.60    0.90
  -2  -3  15 2312.85   30.88
   0  -7  12  486.96    7.85
 -10  -8   9  282.11    4.18
 -12   0  14  519.17   11.34
  13  -6   5  362.19    5.55
 -15   0  12  138.97    3.80
   7  -9   6  153.99    4.11
 -18  -3   2    0.53    0.93
   1  -1  15   16.05    1.31
   9  -9   4  102.17    3.18
   4 -11   1   16.79    0.84
 -16   0  11    0.06    1.65
  11  -8   4   33.43    1.00
   5 -10   5 1010.96   20.16
  11  -2  10   40.60    1.50
  -2  -5  14  458.01    7.32
   9  -6   9  293.02    5.11
   2 -11   3  351.97    5.92
  -1  -8  11  579.12    8.04
 -14  -3  12   -0.16    0.93
 -18  -3   5    1.81    1.15
  18  -2   0  236.40    4.05
 -10  -6  12  407.31    5.95
  -5  -8  11    1.34    0.78
   3  -8  10  142.12    2.62
   1 -10   7  165.42    2.62
  14  -4   6   36.77    1.34
  14  -5   5  219.98    3.71
  -9  -4  14  408.62    6.01
 -12  -8   7   45.15    1.46
  -7  -6  13  209.83    3.43
 -13  -6  10  189.32    3.21
  16   0   5   -1.50    1.71
  13  -8   0    4.18    0.78
   4  -9   8  332.53    6.23
  18   0   1    0.72    1.37
   0  -6  13   13.40    1.03
  10  -7   7  152.52    2.62
  10  -1  11    6.76    1.06
 -16  -4   9 1087.33   14.02
  11  -7   6    7.14    0.78
   3  -3  14    8.66    1.15
  15  -2   6  214.97    3.80
 -13  -8   5 2921.11   34.80
 -16  -3  10   66.43    1.71
  -5 -10   7    1.25    0.81
  -6  -5  14   22.50    1.22
  -1 -11   4   12.74    0.78
 -12  -1  14  312.12    4.77
 -15  -1  12   -0.34    1.06
 -17  -4   7  731.59   10.56
 -18  -2   7  703.17   10.34
 -10  -5  13  573.92    8.19
 -16  -1  11   48.51    1.59
 -16  -6   3   -0.03    0.93
  16  -4   3  180.88    3.24
  -4 -11   3  481.32    7.51
  17  -3   2   61.20    1.74
  -9 -10   2   28.23    1.03
  -2 -11   4  131.24    2.40
  -7  -7  12   92.11    1.99
   3  -5  13   45.71    1.46
 -12  -5  12  535.13    7.51
  16  -3   4    0.87    0.97
   0 -11   4    3.96    0.65
 -14  -6   9   53.06    1.59
   7  -8   8   24.52    0.62
   4  -2  14  531.95    7.82
  -9 -10   1  163.34    2.74
 -11  -9   5  173.53    2.93
  -7  -3  15    7.51    1.06
  -7 -10   6    2.12    0.90
 -18   0   8   18.01    1.62
 -16  -6   4   10.41    0.90
  -8 -10   5  139.94    2.59
  16  -1   5   56.15    1.71
   9  -5  10  478.82    7.20
  18  -1   1   64.90    1.74
 -16  -6   2   17.98    1.09
  -5 -11   1    0.41    0.65
   8 -10   2   36.89    1.03
  -1  -3  15  774.37   11.75
   6  -6  11    9.25    0.97
  11  -9   1  100.74    1.90
  -1  -5  14  195.68    3.83
   6  -7  10   15.52    0.84
   9  -7   8  439.22    6.76
  10  -4  10  370.48    5.76
  -9 -10   3   48.64    1.28
 -12  -6  11  309.01    4.67
 -18  -3   1    1.37    0.93
   5 -11   0  370.30    5.11
 -14   0  13    0.09    1.40
   6  -9   7   11.62    1.12
 -17  -5   3    0.44    0.84
   0  -8  11  347.99    5.95
  10  -9   3  136.88    2.18
  -5 -11   2    0.44    0.75
  -6  -8  11   70.05    1.68
  12  -7   5  395.22    5.98
  -3 -11   4  576.60    8.01
  17  -2   3    6.92    1.00
   2  -9   9 1339.16   17.26
 -17   0  10   44.96    2.24
 -17  -5   4  110.74    2.27
   7   0  13   -2.84    1.31
  -9  -2  15   58.95    1.65
   4 -10   6  121.08    3.77
 -18  -1   8  112.92    2.27
   4  -7  11    0.93    0.72
   1 -11   4    2.37    0.50
   4 -11   2    1.93    0.62
 -14  -7   7  268.90    4.05
  13  -3   8  144.39    2.74
 -18  -3   6   25.05    1.37
  15  -6   2  198.64    3.43
 -10   0  15   -0.69    1.46
   9 -10   0   89.40    1.93
 -10  -7  11 1367.79   17.92
 -15  -7   3    9.88    1.00
   1  -7  12  257.22    4.21
   3 -11   3  154.58    2.84
  -7  -9   9  335.93    5.08
   2  -4  14    0.16    1.06
  17  -4   1   22.62    1.18
  -7  -5  14  221.54    3.80
 -17  -5   2  110.71    2.37
   2 -10   7  219.02    4.08
 -11  -3  14   42.35    1.46
   1  -2  15   27.67    1.40
  -9  -8  10 2385.67   28.98
   4  -6  12    0.59    0.84
 -15  -7   2    4.49    0.81
 -14  -1  13    1.99    1.09
  12  -3   9  191.54    3.49
 -16  -6   5   46.74    1.40
   7  -4  12    6.95    1.12
   2   0  15    0.75    1.53
 -16  -6   1    0.06    0.90
 -10  -9   7  241.45    3.83
 -17  -1  10   36.52    1.59
  12  -8   3  156.95    2.62
 -13  -3  13  428.75    6.01
  14  -3   7    5.89    1.00
 -15  -7   4  325.99    5.05
   7  -1  13  163.83    3.24
  14  -6   4 1353.30   17.82
 -19   0   4  162.37    4.24
 -12  -4  13  101.55    2.12
  -8  -6  13   13.37    1.09
  -6 -10   7   69.70    1.59
  15  -4   5  245.88    4.18
 -19   0   3    0.62    1.50
 -16  -5   8  806.62   10.53
  10  -2  11   21.34    1.31
 -10  -1  15    5.23    1.09
   5 -11   1   21.47    0.90
   1  -6  13   88.24    2.09
   5   0  14 2573.65   45.74
   6  -3  13   62.29    1.99
   5  -4  13   19.29    1.22
 -17  -5   5    1.06    0.93
  13  -8   1    0.19    0.78
 -12  -2  14  229.49    4.33
  -9  -9   8    1.56    1.00
 -15  -2  12   -0.93    0.97
  -5 -11   3  695.88   10.19
   8  -6  10  562.11    9.91
  16  -5   2  704.70   10.28
  -9 -10   4    6.08    0.87
  14  -7   2  452.40    6.92
 -16  -2  11    3.55    0.87
  -8  -3  15  361.04    5.67
  -4 -11   4  809.27   11.03
 -13  -8   6  209.98    3.49
   2  -1  15    2.99    1.12
 -15  -6   8  100.77    2.09
  -8  -7  12 1399.82   17.64
   0  -3  15   79.80    2.12
 -19   0   5   -0.87    1.40
   0  -5  14   51.16    1.71
 -19  -1   4   14.18    1.09
  15  -5   4   60.88    1.62
 -17  -3   9    7.82    1.03
   2 -11   4    1.18    0.53
   8  -3  12   35.90    1.31
  16  -2   5   46.83    1.56
 -15  -7   1  100.02    2.06
   9   0  12  636.33   12.99
  18  -2   1  104.57    2.43
 -19  -1   3  196.93    3.58
   6  -5  12  206.55    3.58
   5  -1  14   61.54    1.96
 -10  -4  14  353.75    5.45
  -3  -9  10    4.08    0.78
   8  -7   9   40.94    1.18
 -17  -5   1   25.08    1.18
 -19   0   2   67.09    2.40
   1  -8  11   85.44    1.84
  -2 -10   8   40.91    1.22
  -2  -9  10   30.57    1.18
  -7  -8  11  152.56    2.84
   7 -10   4   18.13    1.71
   4  -8  10   10.13    0.78
  -4  -4  15  967.43   14.36
   9 -10   1 1359.69   19.41
 -12  -9   2   54.84    1.46
 -11  -9   6   13.55    0.93
  11  -3  10    0.78    1.06
  -3 -10   8    7.79    0.78
  13  -7   4   50.88    1.31
   6  -8   9   -0.31    0.47
 -15  -7   5   48.02    1.40
  18  -3   0   39.54    1.53
  -4   0  16    5.42    1.46
   6 -10   5  742.96   14.49
 -12  -9   3 3035.99   36.33
  -4  -9  10   31.00    1.18
  -5  -4  15  452.49    7.51
  -1 -10   8   73.66    1.71
  -5   0  16    6.57    2.15
 -19  -1   5   71.63    1.78
 -18  -2   8  183.43    3.77
  -3  -4  15  916.58   12.90
   9  -1  12 1125.31   15.61
  -1 -11   5    1.50    0.69
  14   0   8 5602.88   95.85
  13   0   9    0.03    1.31
  -6 -11   1    3.65    0.69
 -17  -4   8 1026.44   13.27
  -2 -11   5    4.05    0.84
   5  -9   8  103.01    2.31
  -8  -5  14  461.31    7.26
  15  -3   6   20.85    1.15
 -13  -7   9  231.36    3.74
 -19  -1   2 1467.22   19.35
  17   0   4   15.80    1.62
  -1  -9  10   66.28    1.62
  11  -9   2   52.78    1.31
 -11  -6  12  115.97    2.49
 -16  -6   6  260.99    4.18
  -8 -10   6   52.91    1.46
 -18  -4   3   55.46    1.90
 -18  -3   7  558.62    8.54
 -12  -9   1  626.52    8.41
  -3   0  16    0.78    1.37
 -12  -7  10  164.68    3.02
  18   0   2 1255.71   24.99
   9  -4  11  399.83    6.23
  -6 -11   2   50.98    1.28
 -11  -8   9    3.05    0.87
 -18  -4   4   16.30    1.12
  16  -6   0   62.26    1.62
   8 -10   3 2331.76   40.69
   4 -11   3   35.46    0.93
 -14  -2  13   22.06    1.18
 -12  -8   8   24.21    1.12
   8  -5  11   65.18    1.78
   3  -9   9  810.61   12.87
  -4 -10   8    1.87    0.84
   0 -11   5    2.12    0.62
   3 -10   7    1.40    1.37
   4  -3  14   20.07    1.25
   6 -11   0  862.73   13.27
 -17  -5   6   94.26    2.06
  -4  -1  16   99.30    2.27
  10  -8   6   88.27    1.71
 -11  -5  13 1042.55   13.30
  -6   0  16  368.77    8.07
   2  -7  12   18.73    1.03
 -15  -4  11  352.47    5.17
   5 -11   2    0.16    0.56
 -17  -2  10   15.39    1.15
   7  -2  13   13.52    1.25
  -5  -1  16   51.10    1.68
 -14  -5  11   44.12    1.50
  -6  -4  15  291.21    5.52
 -19   0   6  162.49    4.27
  -3 -11   5   34.15    1.09
 -13   0  14  779.26   16.70
   4  -5  13  142.37    2.84
  14  -1   8  388.34    5.89
  13  -1   9  355.21    5.48
 -10  -2  15    3.18    1.12
  -8  -9   9  684.29    9.41
 -12  -9   4   38.61    1.22
  -2  -4  15  565.88    8.63
   0 -10   8  113.86    2.21
  -5 -11   4  309.57    4.86
  -5  -9  10    3.02    0.84
  17  -1   4   79.52    2.27
   9  -8   7  290.84    4.71
   9  -9   5   61.57    1.50
 -15  -5  10  196.33    3.33
 -18  -4   2    9.72    1.28
   8  -9   6    1.00    0.69
  -3  -1  16  117.84    2.52
  18  -1   2    1.18    0.87
  -9 -10   5   13.40    1.03
  15   0   7    0.97    1.40
 -18   0   9    1.00    1.71
  12   0  10  187.36    5.23
 -19   0   1    1.43    1.25
  -7 -10   7   26.61    1.12
  15  -7   0    0.25    0.90
 -14  -8   3  373.60    5.45
   5 -10   6    5.52    1.59
  12  -5   8  583.98    9.78
 -14  -4  12   72.85    1.87
   3 -11   4    4.67    1.53
   2  -2  15    1.96    1.03
 -18  -4   5   17.32    1.12
 -14  -8   2   91.83    1.96
  11  -8   5    0.62    0.65
  -6  -1  16   16.70    1.15
  -9  -6  13   12.31    1.06
  17  -3   3  201.07    3.61
  -2   0  16    3.27    1.37
  12  -6   7  308.41    5.17
  -9  -3  15   36.33    1.56
 -19  -2   4   87.62    1.99
  -6 -11   3  384.32    5.61
   2  -6  13  126.97    2.62
  13  -5   7  322.34    5.55
 -19  -1   6   15.17    1.18
   0  -9  10   91.83    2.06
 -13  -1  14  602.49    8.26
 -19  -2   3    2.56    1.22
 -11   0  15    1.03    1.18
   1 -11   5  148.97    2.56
   3  -4  14    0.28    1.09
  11  -6   8  548.12    8.29
   5  -2  14 1085.96   14.96
   1  -5  14    8.41    1.06
 -16  -4  10  407.84    5.98
  17  -5   0   88.31    2.34
 -14  -7   8   16.27    1.06
  12  -9   0  130.62    2.40
   1  -3  15   12.96    1.09
  -5 -10   8   15.55    1.03
 -10 -10   2  128.28    2.24
  -7   0  16    8.10    1.59
  15  -1   7   76.28    1.93
 -18  -1   9    2.24    0.93
  17  -4   2   90.17    2.12
  12  -1  10  110.40    2.40
 -14  -8   4  233.72    3.80
 -19  -1   1   -0.69    1.09
   6 -11   1    0.22    0.69
  10  -9   4    3.74    0.78
 -15  -7   6  196.30    3.30
  13  -8   2   -0.97    0.78
 -10  -8  10 1034.30   13.30
  -4 -11   5   80.98    1.78
   5  -7  11   68.33    1.68
  16  -4   4  250.33    4.52
   2  -8  11   47.42    1.43
   3   0  15    0.09    1.43
 -13  -5  12  131.37    2.71
  11  -5   9  181.35    3.58
  -2  -1  16    6.73    1.15
  -7  -4  15    0.56    0.97
  -8  -8  11   12.09    1.09
 -10 -10   1  292.12    4.61
 -19  -2   5   94.54    2.03
  -9  -7  12 1045.83   13.65
  15  -6   3   62.54    1.68
 -11  -7  11  693.10    9.60
   9  -2  12   30.75    1.40
 -13  -8   7  207.36    3.43
   7  -9   7    4.21    1.15
 -14  -8   1    1.59    0.84
 -11  -1  15    0.75    1.03
  10  -3  11   57.18    1.74
   9 -10   2   10.59    0.62
 -10 -10   3  122.70    2.18
  13  -6   6   47.70    1.50
  -1  -4  15  221.79    3.83
   8  -8   8   59.45    1.25
   1 -10   8    0.19    0.62
 -19  -2   2   46.61    1.62
 -14  -6  10   73.82    1.78
 -12  -3  14  186.83    3.49
  -4  -7  13    1.28    0.97
  -6  -9  10    2.96    0.93
 -15  -3  12   35.02    1.37
  -3  -7  13   12.03    1.00
   5  -6  12   12.56    1.03
 -16  -3  11   81.92    1.87
  -7  -1  16  176.45    3.30
   7  -7  10    4.99    0.78
 -18  -4   1   24.65    1.25
   7  -6  11  328.48    5.64
 -12  -9   5  334.90    4.92
   3  -1  15    0.75    1.03
  14  -5   6  439.00    7.60
  -4  -2  16  447.76    7.42
 -16   0  12  185.77    6.82
  -9  -5  14  134.51    2.62
 -13  -6  11  103.64    2.18
  10  -6   9  669.17   10.10
  -5  -2  16  257.41    4.27
  13  -4   8  678.30    9.25
 -10  -9   8   31.13    1.18
  16  -3   5    6.23    1.09
 -18  -4   6   18.42    1.15
  18  -3   1  189.20    3.49
  -1   0  16   -0.03    1.78
  14  -2   8  889.91   12.09
  13  -2   9    1.12    0.90
 -16  -5   9  263.76    4.11
  -5  -7  13   13.12    1.06
  14  -7   3  428.00    6.73
 -16  -6   7   97.59    2.06
  -2  -7  13    7.17    0.87
 -19   0   7   -0.31    1.46
  12  -8   4  115.41    2.15
  17  -2   4   19.44    1.22
   2 -11   5   39.95    1.93
 -11  -4  14  278.10    4.27
  -4  -6  14  209.51    3.71
 -17  -5   7   19.75    1.18
  16   0   6  369.17    8.69
  16  -6   1   18.76    1.09
  -3  -2  16  515.93    8.04
  10 -10   0   38.14    1.12
  18  -2   2  177.39    3.37
 -11  -9   7   97.09    2.03
  11   0  11    1.87    1.62
   1  -9  10   80.67    1.81
  16  -5   3  858.53   11.62
  12  -4   9  192.53    3.40
 -14  -8   5 1999.05   24.24
  -6 -11   4   43.19    1.25
  11  -7   7  510.48    7.98
  -3  -6  14  350.35    5.64
   5 -11   3  704.35   14.30
 -16  -1  12    2.27    1.18
  -6  -2  16   30.16    1.43
 -13  -4  13   44.03    1.46
  14  -4   7  259.90    4.33
  -7 -11   1   33.40    1.00
 -17   0  11   -1.31    1.50
 -10 -10   4   36.86    1.22
  -8   0  16   33.50    1.78
   4 -10   7   75.93    2.90
 -18  -3   8  133.67    2.74
  -5  -6  14  133.45    2.74
  19   0   0 1399.20   25.64
 -15   0  13    1.31    1.62
 -19  -2   6   18.20    1.15
 -13  -2  14   66.37    1.87
  -6 -10   8    1.06    0.90
  -1  -1  16   27.08    1.34
 -15  -6   9   25.21    1.25
  -7 -11   2   19.10    0.90
   5  -8  10   83.82    1.84
  -5 -11   5   27.89    1.12
   6  -4  13  309.10    5.11
 -19  -1   7    2.87    1.06
  -3  -8  12    2.99    0.93
   4  -9   9  507.61    8.85
   4 -11   4   57.64    2.34
   3  -7  12   91.86    2.06
  12  -7   6  142.71    2.65
  15  -7   1   40.48    1.28
   6   0  14 2136.86   39.20
  11  -9   3   68.11    1.40
  10  -7   8  521.60    7.51
  16  -1   6 1196.14   16.51
   8   0  13   -0.81    1.74
  -4  -8  12   95.28    2.06
  14  -8   0    2.06    0.84
  10  -5  10  427.66    7.45
  12  -9   1   82.98    1.74
  11  -1  11   22.19    1.31
   6 -11   2    4.24    0.50
  -8  -4  15    1.15    1.25
  15  -2   7   82.45    2.09
 -18  -2   9 3552.48   45.49
  12  -2  10    5.20    1.18
 -14  -3  13   36.46    1.50
 -19  -2   1  346.33    5.48
  -2  -6  14  482.44    7.17
  -6  -7  13   23.37    1.22
  -9 -10   6  114.88    2.34
  -1  -7  13    7.60    1.09
  -2 -11   6   67.71    1.59
   7 -11   0  405.32    6.61
  -2  -8  12   30.50    1.18
  14  -6   5  315.17    6.17
  -9  -9   9  768.20   10.13
  -2  -2  16  184.18    3.58
 -17  -3  10    1.00    1.09
   7 -10   5  305.45    6.98
  -8 -10   7   73.38    1.74
 -17  -1  11  240.89    3.89
  -1 -11   6   36.64    1.12
   0  -4  15   47.52    1.53
   7  -3  13  112.58    2.49
  -8  -1  16   62.16    1.71
 -17  -4   9 1565.78   19.23
   8  -4  12    3.27    1.06
  19  -1   0 1345.79   18.38
 -15  -1  13   39.01    1.59
   2 -10   8    0.44    0.90
   8 -10   4   81.01    2.90
 -11  -2  15   70.95    1.81
   6  -9   8    2.06    0.93
 -10  -3  15    2.21    1.06
  -6  -6  14   25.46    1.25
  -7  -9  10   50.42    1.59
   2  -5  14   47.05    1.62
   6  -1  14   48.51    1.65
  17  -5   1 1180.46   16.33
  -7 -11   3   26.30    1.06
  -5  -8  12   75.90    1.90
   8  -1  13   59.58    1.81
 -10  -6  13   73.60    1.84
  -3 -11   6  592.68    8.41
  -7  -2  16   25.27    1.40
   7  -8   9   12.28    0.69
  11  -4  10  105.63    2.49
   3  -6  13   59.14    1.90
 -15  -7   7  530.80    7.35
 -12  -6  12   26.39    1.40
   7  -5  12  555.41    8.23
   2  -3  15  139.69    2.77
  18  -4   0  327.98    5.73
   0 -11   6  141.99    2.56
   3  -2  15   11.56    1.28
 -19  -3   4   70.86    1.78
 -12  -5  13  753.43    9.94
   3  -8  11   61.76    1.62
  18   0   3   -0.87    1.59
   0   0  16    5.14    1.62
   9  -6  10 1007.81   14.96
  15  -5   5  139.87    3.05
 -19  -3   3   70.08    1.78
  10 -10   1  415.60    5.64
  -9  -8  11   77.46    1.84
   6 -10   6   46.21    2.15
  -1  -8  12   84.66    1.93
   5  -3  14    1.71    1.06
 -12  -9   6  114.32    2.24
  15  -4   6   10.38    1.03
   5  -5  13  226.09    3.89
   3 -11   5   34.90    1.99
  13  -7   5  436.76    6.54
  -1  -6  14  366.46    5.67
 -18  -4   7  250.61    3.99
 -12  -8   9   75.84    1.81
 -17  -6   3    0.50    0.87
   9  -7   9   41.29    1.56
   9 -10   3 1209.26   23.00
 -14  -8   6  469.41    6.79
   2  -9  10  133.67    2.46
 -10  -7  12 2045.75   25.77
 -10 -10   5  222.41    3.55
   4  -4  14  236.75    4.27
 -12   0  15   -0.19    1.34
 -16  -2  12    0.47    1.09
   7 -11   1   15.95    0.90
 -17  -6   4   61.88    1.71
  -4 -11   6 1253.13   16.33
 -19  -3   5  206.34    3.89
  -7  -7  13   12.40    1.06
  18  -1   3    5.61    1.09
 -13  -7  10    0.31    1.00
   0  -1  16   87.40    2.15
   9  -3  12   23.24    1.25
  -1  -2  16    0.62    0.97
   0  -7  13   31.38    1.18
  -6  -8  12   15.55    1.12
  13  -8   3    0.34    0.69
  -9   0  16   32.22    1.96
 -19  -2   7    1.06    1.09
 -10  -5  14    6.04    1.09
 -19  -3   2   15.30    1.15
 -18   0  10  497.55    9.66
  -6 -11   5   21.69    1.00
  -2 -10   9    1.90    0.78
  -7  -6  14    6.51    1.03
 -17  -6   2   21.00    1.09
  -7 -10   8   60.51    1.68
  -3 -10   9   79.61    1.78
   1 -11   6  230.11    3.55
  16  -2   6   18.13    1.31
  11  -2  11    1.00    1.09
 -16  -7   3   44.81    1.43
 -14   0  14 1014.73   26.27
 -19   0   8   12.84    1.62
  -4  -5  15  118.31    2.40
 -13  -8   8  103.07    2.15
   4   0  15   -1.74    1.53
 -11  -8  10  110.18    2.34
 -14  -7   9   50.73    1.53
  17   0   5    0.28    1.43
  -7 -11   4    8.07    0.90
  -4  -3  16    4.08    1.18
 -13  -9   2   29.16    1.15
 -12  -1  15    4.77    1.22
 -13  -9   3 2007.90   24.62
  10   0  12  132.99    3.99
  17  -4   3  360.95    5.86
  -5  -5  15    4.86    0.93
 -17  -2  11    0.16    1.15
  14  -8   1    8.04    0.97
  -5  -3  16   32.31    1.43
  -8  -2  16    2.18    1.22
  -9  -4  15    7.98    1.12
  19  -2   0  358.98    5.76
  -3  -5  15  191.78    4.02
 -16  -7   4   41.63    1.31
 -15  -2  13    6.98    1.12
 -16  -7   2   45.84    1.40
  -1 -10   9  220.39    3.74
  14  -3   8    9.32    1.00
 -16  -6   8   22.47    1.34
  13  -3   9  139.59    2.87
 -17  -5   8  555.85    8.19
  -9  -1  16   11.84    1.31
  -4 -10   9   72.69    1.74
   9  -9   6   55.21    1.59
   6  -7  11    2.06    0.75
 -18  -1  10  123.98    2.84
  17  -3   4    9.78    1.03
   0  -8  12  168.38    3.05
 -17  -6   5    1.65    1.03
   6  -2  14 1474.01   19.54
 -18  -5   3    6.33    0.93
   8  -2  13   18.35    1.37
  16  -6   2   78.65    1.84
   1  -4  15    1.65    1.06
  -3  -3  16    1.74    1.28
  18  -3   2  102.76    2.34
   9  -5  11  257.84    4.83
  19   0   1   -0.37    1.46
   6 -11   3 2860.66   50.98
 -12  -7  11   80.14    2.03
 -14  -1  14  441.81    6.20
 -18  -5   4  127.04    2.65
 -19  -1   8   45.37    1.56
   5 -11   4   14.21    1.71
   4  -1  15   17.76    1.43
  12  -9   2   48.76    1.31
  10  -9   5  164.55    3.30
   3 -10   8   34.28    1.31
  17  -1   5   17.51    1.28
  -6  -3  16  200.79    3.58
 -15  -5  11   21.78    1.25
  10  -1  12  440.28    7.01
 -13  -9   1  241.05    3.93
   5 -10   7   32.84    1.90
   0 -12   0    2.62    1.18
   0  -6  14   40.54    1.43
  15  -6   4  956.74   13.99
  -8  -9  10    2.15    0.93
 -13  -9   4  109.84    2.06
  -6  -5  15   -0.31    1.12
 -19  -3   6   17.26    1.28
 -13  -3  14  145.42    2.77
  10  -8   7   13.02    0.72
  15  -7   2 1153.51   15.49
  10  -4  11  481.00    6.98
  -5 -11   6 1328.84   17.08
 -11 -10   2   35.77    1.22
  11  -8   6    3.74    0.72
   6  -6  12    0.87    1.06
  -3  -9  11  598.97    8.35
  -2  -5  15   91.05    2.31
 -17  -6   1   94.75    2.09
   8  -9   7   10.94    1.00
   1 -12   0   24.93    1.03
 -12  -4  14  173.59    3.12
 -15  -4  12    0.22    1.09
 -18  -5   2  392.82    6.29
 -11  -9   8   17.73    1.06
  -8 -11   2    4.83    0.75
  -8 -11   1    3.18    0.72
   4  -7  12   82.73    1.90
 -16  -4  11  293.46    4.55
   0 -12   1  412.27    6.20
  19  -1   1   11.65    1.25
  15  -3   7   34.80    1.34
 -18  -3   9    6.29    1.28
  -2  -9  11 1690.79   21.66
  12  -3  10   18.38    1.28
   0 -10   9  504.15    7.79
 -19  -3   1   55.03    1.71
  -4  -9  11    1.62    0.90
   5  -9   9   46.89    1.71
 -11 -10   3   28.29    1.12
 -16  -7   5   -0.69    1.03
  -7  -8  12    4.42    0.97
  -1 -12   1  341.97    5.39
 -14  -5  12    5.33    1.12
 -18  -5   5   -0.44    1.09
   1   0  16    1.78    1.84
 -16  -7   1   23.46    1.15
 -11 -10   1  106.03    2.09
  -5 -10   9    5.92    0.97
   2 -11   6  117.10    3.37
  10 -10   2   12.84    0.75
  -2  -3  16   -0.22    1.06
   7 -11   2   34.62    0.93
  14  -7   4   47.46    1.40
  18  -2   3   53.75    1.71
  -9 -10   7   37.98    1.31
  -8  -7  13    1.65    0.97
   0  -2  16  110.09    2.62
  16  -4   5  120.21    2.52
   4 -11   5  668.77   14.40
  18  -4   1  119.90    2.43
   1 -12   1  223.72    3.61
 -11  -3  15  117.35    2.68
   1  -7  13    1.37    0.93
   3  -5  14   -0.56    1.00
  -8  -6  14    8.94    1.06
 -16  -5  10  135.32    2.59
 -10  -9   9  351.16    5.33
   8  -7  10   56.15    1.56
   6  -8  10   10.38    0.65
   9  -8   8   21.25    0.81
   2 -12   0    3.68    0.75
  -7  -3  16  233.79    4.08
  -8 -11   3   62.19    1.46
  11  -9   4    5.73    0.59
  17  -5   2  894.92   13.15
   8 -11   0    3.71    0.90
  -2 -12   1  422.27    6.23
   8  -6  11  746.82   11.28
  -1  -9  11 2425.12   29.57
  12  -8   5   86.47    1.74
  16  -5   4    0.65    1.09
   1  -1  16   28.82    1.46
  -5  -9  11  287.94    4.64
 -10 -10   6    7.82    1.00
   3  -9  10   10.16    0.72
   3  -3  15  197.30    3.99
 -17  -6   6  161.97    2.99
 -12  -2  15  668.08    9.07
 -11  -6  13   84.88    2.06
 -15  -7   8  113.29    2.34
 -12  -9   7   17.60    1.15
  -7  -5  15   78.96    2.12
 -18  -4   8  734.27   10.19
   4  -8  11   76.00    1.78
 -14  -6  11    0.69    1.09
 -14  -8   7   75.12    1.84
  13  -9   0    0.59    0.84
   4  -6  13  130.56    2.84
  -1 -12   2  659.20    9.19
 -10   0  16  141.77    3.86
 -20   0   4  226.40    5.73
   0 -12   2  438.16    6.36
  -9  -2  16   37.30    1.40
 -10  -8  11  119.31    2.43
 -15  -8   3  272.24    4.30
 -11 -10   4  118.87    2.18
  -1  -5  15    3.24    1.06
   1  -8  12  181.78    3.46
 -13  -9   5  417.72    6.11
 -18  -2  10   42.28    1.59
  -7 -11   5    2.77    0.90
  14   0   9   -1.43    1.50
 -15  -6  10    9.97    1.12
   2 -12   1   99.68    1.90
 -20   0   3    1.43    1.53
  -8 -10   8  231.61    3.93
 -14  -2  14    3.99    1.18
 -19  -2   8   79.33    2.09
 -18  -5   1  401.55    6.26
  11 -10   0   19.29    0.90
 -15  -8   2  123.36    2.34
  -2 -11   7    1.46    0.69
 -14  -4  13    2.46    1.18
   4  -2  15  164.27    3.27
  12  -6   8  306.54    5.23
   8 -10   5   45.77    2.27
   7  -9   8   14.15    1.06
  17  -2   5    7.54    1.15
 -16  -3  12   14.36    1.25
   1 -10   9  827.03   11.15
  -2 -12   2 1403.94   18.17
  10  -2  12    4.14    1.06
  -1 -11   7    3.71    0.72
 -17  -4  10  703.79    9.53
 -15  -8   4   40.79    1.40
 -20   0   5    0.59    1.37
  15   0   8 1421.73   28.64
   7  -4  13  803.25   11.03
   1 -12   2  150.75    2.62
  13  -5   8   13.71    1.18
  -3 -11   7   72.79    1.74
  13  -6   7  425.91    7.23
 -18  -5   6    4.83    1.03
  -1  -3  16    7.07    1.15
  -6 -11   6  416.63    6.08
 -10  -1  16   47.36    1.62
 -10  -4  15   -0.65    1.18
 -20  -1   4  101.17    2.37
  -6 -10   9   78.08    1.84
 -19  -3   7   23.03    1.50
   1  -6  14   31.28    1.31
  17  -6   0  228.80    4.05
   7   0  14 1313.58   24.90
  13   0  10  493.19   11.50
  -3 -12   1  306.86    4.64
 -11  -7  12  864.85   11.22
 -16  -7   6   42.16    1.37
  14  -1   9   24.80    1.37
   3 -12   0    2.99    0.81
 -11  -5  14    0.28    1.03
   7 -10   6    6.79    1.53
  16  -3   6    5.92    1.06
 -20  -1   3  206.65    3.77
   9 -10   4   72.85    2.62
  11  -3  11   34.43    1.37
  14  -8   2    1.56    0.84
  19  -2   1  121.58    2.59
  16  -7   0   78.65    1.81
  12  -5   9  254.32    4.55
   0  -9  11 2397.32   32.53
  -6  -9  11  416.13    6.51
  -8 -11   4    3.55    0.84
   2  -4  15    9.41    1.25
   8 -11   1    1.50    0.65
 -13  -6  12   22.75    1.18
  11  -6   9  496.58    7.79
 -20   0   2   32.31    2.06
 -13  -5  13  228.83    3.61
  14  -5   7  424.51    6.86
  -8  -8  12  178.35    3.46
 -17  -3  11  306.48    4.92
 -20  -1   5  142.27    2.71
  15  -1   8   33.12    1.46
 -19   0   9    1.43    1.50
   0 -11   7    1.56    0.65
  -8  -3  16  102.92    2.37
 -19  -4   4    9.13    1.46
  19  -3   0   32.94    1.34
   3 -11   6   28.26    1.90
 -15  -8   1    1.22    0.84
 -17   0  12   31.72    2.34
 -15  -3  13  169.88    3.05
   4 -10   8    7.48    0.87
 -19  -4   3   72.54    2.24
   5  -4  14  268.25    4.61
   6  -5  13   26.67    1.34
   8  -8   9    0.50    0.69
  -4 -11   7   37.24    1.28
 -16   0  13    0.84    1.31
   7  -1  14   60.23    1.90
  13  -1  10    4.08    1.18
 -13   0  15   -0.37    1.62
   6  -3  14    3.12    1.15
  -3 -12   2 1422.57   18.45
   8  -3  13  115.35    2.52
  -9  -9  10    0.00    0.93
   2 -12   2   19.23    0.78
  -8  -5  15  539.15    7.88
   3 -12   1   74.91    1.53
  18   0   4   77.31    3.08
   6 -11   4    7.45    1.40
  -1 -12   3   70.33    1.74
   9   0  13    0.03    1.53
  13  -8   4  695.29    9.66
 -15  -8   5  749.75   10.22
   1  -2  16  113.79    2.52
 -20   0   6  489.04    9.66
  14  -6   6   75.03    1.87
 -11 -10   5  172.19    2.84
  -9  -6  14    0.19    1.00
  -9  -7  13   19.75    1.25
 -20  -1   2  922.15   12.78
  12  -9   3    3.83    0.72
   0 -12   3   37.11    1.12
   0  -5  15   16.51    1.28
  16   0   7    1.84    1.43
 -19  -1   9   73.19    1.81
 -19  -4   5    3.05    1.12
  12  -7   7  774.49   10.66
 -17  -5   9  106.31    2.27
   8  -5  12  625.08   11.47
 -17  -1  12    9.88    1.28
   2  -7  13   78.55    1.99
   9  -4  12    9.19    1.03
 -16  -6   9   15.74    1.25
  19   0   2  852.45   17.67
   7 -11   3 3871.96   66.56
  -2 -12   3   86.87    2.09
  11  -7   8  437.85    6.42
   5   0  15    0.28    1.71
   2   0  16   31.69    1.99
 -13  -8   9   66.00    1.71
 -16  -1  13   82.07    2.46
 -19  -4   2    1.00    1.12
  13  -9   1    0.59    0.78
 -13  -1  15   17.17    1.28
  11 -10   1  274.14    4.11
 -17  -6   7   10.41    1.06
 -12  -8  10    9.29    1.09
  16  -6   3  234.22    3.77
   5 -11   5 1439.58   26.77
   6 -10   7    5.36    1.59
  18  -1   4   16.05    1.25
 -13  -9   6   51.94    1.62
  11  -5  10  218.71    4.11
  12   0  11    1.31    1.62
  10 -10   3  164.86    4.27
   9  -1  13    1.22    1.09
  18  -5   0   12.96    1.15
   1 -11   7    6.42    0.47
 -20  -1   6   60.67    1.74
  -4  -4  16  780.69   11.22
  -4 -12   1   93.42    1.81
   2  -8  12   -0.03    0.81
   2 -10   9  575.32    9.63
   1 -12   3    6.11    0.69
  16  -1   7    0.62    1.06
  -5  -4  16  457.42    6.82
  15  -7   3  326.05    4.89
  18  -3   3  110.12    2.43
   0  -3  16    0.90    1.09
  14  -4   8  464.21    7.10
 -18   0  11    0.16    1.56
  13  -4   9  131.27    2.62
   4 -12   0    3.58    0.72
 -10  -2  16    0.65    1.03
  19  -1   2    4.86    1.09
 -20  -2   4  438.35    7.07
  13  -7   6  287.41    4.58
   5  -1  15    5.73    1.09
   2  -1  16   14.86    1.25
  15  -5   6   70.17    1.96
  -5 -11   7    3.93    0.87
  17  -4   4   25.11    1.22
  -7 -10   9  142.90    2.80
   1  -9  11 1811.31   23.62
 -14  -7  10   20.78    1.18
  14  -2   9   45.52    1.59
 -20   0   1    1.53    1.50
  -7  -9  11    3.05    1.06
  10  -6  10  822.54   11.15
 -18  -5   7    1.28    1.06
   5  -7  12   20.85    1.06
 -20  -2   3    6.89    1.18
  -3  -4  16  499.61    7.63
  18  -4   2  161.68    3.12
  -3 -12   3  169.44    3.18
   4  -9  10    8.38    0.56
   7  -7  11   98.99    2.09
  -9 -11   2    5.83    0.81
  15  -8   0   25.71    1.12
  -4 -12   2  532.91    7.60
  12  -1  11    0.47    1.06
   6  -9   9    0.81    0.97
 -15   0  14  363.63    7.88
   4  -5  14    8.35    1.12
  -9 -11   1   45.90    1.18
 -12  -3  15  226.99    4.08
  -6  -4  16  117.13    2.62
 -10 -10   7  119.06    2.40
   3 -12   2    3.77    0.78
 -13  -7  11    1.03    0.97
 -11   0  16   71.82    2.74
  10  -7   9    1.68    0.87
  -7 -11   6   24.49    1.18
 -20  -2   5   40.23    1.46
  15  -2   8   39.10    1.56
  -8 -11   5   61.88    1.59
 -19  -4   6   56.59    1.71
 -13  -4  14  165.61    2.96
  -5   0  17    2.99    1.99
 -18  -1  11  221.79    4.11
   8 -11   2   32.47    0.87
  -9  -3  16    7.35    1.12
  -4   0  17    0.34    1.56
 -16  -7   7  316.98    4.83
 -18  -3  10   88.43    2.03
   7  -2  14  920.88   12.90
  13  -2  10    1.28    1.18
 -14  -8   8  114.07    2.24
   2  -6  14   20.53    1.46
  17  -6   1    8.79    1.03
  -9 -10   8  275.10    4.36
 -20  -1   1    3.08    1.09
  -4  -7  14   36.11    1.50
  16  -7   1  169.72    3.02
  -9 -11   3  147.41    2.62
   4 -12   1   46.74    1.50
 -11  -9   9   25.99    1.25
 -14  -3  14   14.02    1.31
  15  -4   7  390.58    6.04
 -19  -3   8  119.46    2.62
 -18  -4   9  751.22   10.10
  12  -4  10   58.58    1.74
 -19  -4   1  195.84    3.89
   4  -3  15   11.97    1.25
 -12  -9   8   57.55    1.62
  -3  -7  14  126.04    2.49
 -15  -8   6  255.60    4.02
   2 -12   3    1.84    0.72
   7  -6  12  309.47    5.36
   5  -8  11    0.25    0.72
  -6   0  17   -0.50    1.68
 -15  -1  14  145.45    3.15
  17  -3   5    4.86    1.15
 -20   0   7   -1.15    1.40
  10  -9   6   12.21    1.12
  10  -3  12    8.94    1.28
  17  -5   3  452.31    7.85
  -2  -4  16   91.45    2.15
 -20  -2   2  209.11    3.83
 -11  -1  16  134.86    2.84
 -19  -2   9  929.94   14.30
  -9  -5  15    4.21    1.18
  -9  -8  12  675.25    9.13
   4 -11   6  166.36    4.77
  -5  -7  14   27.58    1.37
 -11  -8  11  164.21    2.87
 -12  -6  13  165.05    2.99
  -3   0  17   -1.15    1.84
 -17  -2  12    8.51    1.22
  15  -6   5  104.69    2.56
 -15  -7   9    1.18    1.03
  -5  -1  17    6.89    1.28
 -11  -4  15   45.99    1.56
   9 -11   0  167.29    3.40
  -4  -1  17   27.20    1.46
  -3 -10  10   36.18    1.28
 -16  -2  13    0.65    1.12
   5  -6  13   27.54    1.37
   9  -9   7    3.27    1.09
  -1 -12   4  661.98    9.16
 -13  -2  15 1665.05   23.96
  -4  -8  13   27.33    1.40
  -3  -8  13  275.04    4.74
  17   0   6   64.72    2.74
   2 -11   7   80.14    2.77
  -2 -10  10    1.03    0.81
   1  -5  15   10.13    1.12
  -7  -4  16   12.06    1.28
  19  -3   1   71.79    1.90
   7  -8  10   20.85    0.90
  -4 -12   3  121.36    2.56
  18  -2   4   13.62    1.09
 -12 -10   2    0.84    0.97
 -11 -10   6    1.22    0.97
  -2 -12   4 1887.71   23.46
 -14  -9   3  486.55    7.01
  -2  -7  14  253.42    4.21
   9  -2  13  114.98    2.49
   0 -12   4   45.93    1.22
  -6  -1  17    8.66    1.09
   3  -4  15   10.59    1.31
 -20  -1   7   28.04    1.34
 -14  -9   2   28.23    1.09
  11  -9   5  303.15    4.39
 -20  -2   6 1033.61   13.55
  14  -7   5  916.76   12.25
 -12 -10   3  169.85    2.90
  -4 -10  10   47.33    1.50
  16  -2   7   14.24    1.22
  -3  -1  17    5.83    1.12
  -6 -11   7    0.25    0.93
  -5 -12   1    8.88    0.81
  10  -5  11  201.88    3.71
  -5  -8  13   66.59    1.71
  19  -2   2  178.73    3.58
  14  -8   3   30.47    1.18
  -2  -8  13  335.80    5.11
   5 -10   8   42.38    1.28
   5  -2  15  378.90    6.11
  -7   0  17    0.78    1.34
   2  -2  16    0.93    1.28
 -10  -6  14   14.36    1.18
  -6  -7  14   43.53    1.50
  -1 -10  10   24.74    1.03
  11 -10   2   51.76    1.15
 -12  -5  14    8.35    1.15
 -15  -5  12   24.27    1.34
  17  -1   6  116.10    2.71
  -9 -11   4   42.00    1.34
 -10  -7  13  367.05    5.30
 -12 -10   1  179.79    3.27
  11   0  12    4.64    1.90
 -16  -5  11   13.21    1.15
 -14  -9   4   22.78    1.15
  -4  -6  15   85.97    2.03
   5 -12   0   16.33    1.06
  11  -8   7  298.79    4.64
  -2   0  17   -0.44    1.81
  12  -2  11   62.51    1.81
  13  -9   2   10.84    0.84
   3  -7  13   72.38    1.84
   3 -10   9  692.17   11.31
  -5 -12   2    4.58    0.84
 -10  -9  10   76.93    1.93
 -12  -7  12  447.66    6.33
  -3 -12   4 2376.17   29.26
   1  -3  16   13.52    1.25
   2  -9  11  853.20   11.78
 -16  -4  12   96.47    2.21
  -8  -9  11  403.64    6.04
  -5  -6  15   43.28    1.56
   1 -12   4   80.83    1.65
   4 -12   2   19.32    0.93
  -3  -6  15   29.94    1.34
  20   0   0  452.68   10.34
  16  -5   5   39.54    1.46
   9  -7  10  167.64    2.93
 -13  -9   7  234.57    3.77
  18  -5   1 1184.86   17.39
  -1  -4  16    0.62    1.06
 -14  -9   1    1.40    0.84
 -18  -2  11   56.06    1.78
 -17  -6   8    5.52    1.22
  -8 -10   9   94.47    2.09
 -12 -10   4   32.62    1.22
   8  -9   8   52.04    1.65
  -7  -1  17   27.05    1.43
 -19  -4   7    0.69    1.06
  -5 -10  10   66.65    1.71
   3 -12   3   66.68    1.68
   3  -8  12    0.41    0.84
  12  -8   6   25.15    0.97
  15  -8   1   65.62    1.62
   9 -10   5   -1.43    1.65
 -20  -2   1   59.36    1.71
  -2 -11   8   10.72    0.84
  -1  -7  14  212.10    3.86
  10  -8   8   46.05    1.34
  16  -4   6    6.14    1.12
 -18  -6   3    0.28    0.97
 -19   0  10   78.61    2.68
   8 -10   6  113.82    3.49
  11  -1  12  166.51    3.21
   7 -11   4   25.24    1.81
   9  -6  11 1042.77   14.18
  11  -4  11  156.70    3.08
   3   0  16  358.77    8.32
 -18  -6   4   -1.03    0.87
   9 -11   1   58.52    1.56
 -17  -7   3    4.33    1.03
  -2  -1  17    1.22    1.12
  -6  -8  13  132.43    2.65
  -3 -11   8    5.08    0.87
  -1  -8  13  313.31    5.52
 -15  -2  14   15.92    1.25
 -15  -6  11  123.98    2.56
   6 -11   5 1490.09   29.45
 -11  -2  16   72.10    2.03
 -17  -7   4    0.78    1.00
 -17  -4  11  188.26    3.49
  -1 -11   8   36.02    1.22
  -8  -4  16    9.38    1.40
 -18  -5   8   34.65    1.43
  19  -4   0  440.93    6.92
  -6  -6  15   37.89    1.43
  20  -1   0  516.68    7.76
 -15  -4  13    7.98    1.22
   0 -10  10   11.84    0.84
  -5  -2  17  742.09   10.91
 -10  -3  16    0.69    1.00
 -20  -3   4    1.28    1.06
   5 -12   1    0.25    0.84
  -4  -2  17  954.72   13.09
  -2  -6  15    4.77    1.06
  12  -9   4   30.97    0.97
   6  -4  14  282.77    4.89
  -7  -7  14   46.02    1.62
 -17  -7   2   12.15    1.15
  14  -3   9   10.31    1.22
  -5 -12   3   32.90    1.15
  12 -10   0   18.42    0.93
  -8 -11   6  256.88    4.27
   8  -4  13  698.31   10.10
 -18  -6   2  126.76    2.49
 -19  -1  10    5.23    1.31
 -20  -3   3  146.95    3.05
  -8   0  17   -0.34    1.62
   3  -1  16  321.53    5.11
   8 -11   3 2231.15   40.69
 -14  -5  13    2.37    1.03
  -4 -12   4 2034.07   25.58
 -14   0  15   -0.37    1.43
 -14  -9   5  208.55    3.49
  10 -10   4    9.75    1.81
  -4 -11   8   36.52    1.31
 -15  -8   7   16.73    1.18
 -14  -6  12   70.33    1.74
 -18  -6   5   21.00    1.18
  -6  -2  17  594.33    8.76
   3 -11   7    2.40    1.43
 -20  -2   7   69.36    1.87
  19   0   3    0.09    1.78
 -17  -5  10    6.11    1.03
 -20   0   8  317.64    6.54
 -20  -3   5  194.50    3.40
  15  -3   8   22.96    1.37
   7  -5  13   11.53    1.25
   2 -12   4  512.97    8.19
   8   0  14  950.42   18.85
  -3  -2  17  706.69   10.16
  -1   0  17    0.09    1.62
   7 -10   7    0.65    1.31
 -16  -7   8   19.01    1.31
   5  -9  10    1.93    1.25
 -10  -5  15   91.64    2.06
   3  -6  14   10.41    1.18
   0 -11   8   33.78    1.12
  -3  -9  12   70.51    1.78
 -16  -6  10  208.74    3.33
   7  -3  14    8.51    1.40
  13  -3  10   32.90    1.37
 -17  -7   5   82.26    1.93
  13  -8   5  128.84    2.31
  -6 -10  10   61.94    1.74
  17  -2   6   -0.87    1.12
 -12   0  16   -0.59    1.65
  -4  -9  12   89.12    2.09
  16  -7   2 1356.14   18.07
  14  -9   0    1.34    0.78
  -8  -1  17  119.96    2.71
  -9 -11   5   11.47    1.00
  17  -6   2   23.96    1.22
   6   0  15    0.41    1.65
  -7 -11   7   18.73    1.12
 -14  -1  15   20.00    1.43
 -12 -10   5  585.26    8.19
   5 -11   6  177.08    4.61
   9  -8   9   31.53    1.00
  16  -6   4  292.83    5.55
   2  -5  15    3.71    1.06
 -10  -8  12  799.26   11.03
  -2  -9  12   -0.19    0.90
  19  -1   3   14.24    1.28
 -20  -3   2   71.67    2.12
  -7  -6  15   43.37    1.62
 -20  -1   8   75.93    1.93
 -19  -3   9   40.35    1.50
  -7  -8  13   -1.56    1.03
   0  -7  14  105.72    2.21
 -19  -5   4   37.11    1.43
  15  -7   4   29.32    1.25
  18  -4   3  122.39    2.49
   8  -1  14  113.33    2.68
 -13  -8  10   50.85    1.50
   0  -4  16   15.58    1.50
 -10 -10   8   26.73    1.28
 -17  -3  12    3.24    1.15
  -1  -1  17    3.30    1.06
  -1 -12   5   94.51    1.93
 -19  -5   3  148.38    2.99
   0  -8  13  227.21    3.93
  -6 -12   1    3.93    0.75
  -2 -12   5  249.96    4.08
  -1  -6  15    5.92    1.18
   6  -7  12  149.81    2.93
   5  -5  14   20.44    1.28
  -7  -2  17  170.28    3.55
 -16  -3  13  340.41    5.20
 -17  -7   1   10.69    1.03
  18   0   5    0.06    1.56
 -13  -3  15  117.28    2.49
  -5  -9  12   46.80    1.59
 -12  -1  16 1433.69   22.34
  11  -2  12   44.03    1.74
 -11 -10   7   62.04    1.74
  -5 -11   8   53.44    1.68
 -10 -11   2   49.64    1.40
 -16  -8   3    0.41    0.97
  -6 -12   2   40.41    1.22
   1 -10  10   54.78    1.50
 -18  -6   1  151.37    2.77
   4 -12   3    8.13    0.56
   6  -1  15   -0.41    1.28
  18  -3   4    0.25    1.15
   7  -9   9    1.71    1.15
  -2  -2  17  100.11    2.56
   9  -3  13    0.28    1.25
   0 -12   5    6.51    0.75
 -14  -8   9   -0.03    1.09
   6 -12   0   33.34    1.28
 -20  -3   6   15.17    1.28
 -12  -4  15  164.21    2.96
   5 -12   2   18.88    0.87
 -10 -11   1  126.29    2.37
  16  -3   7    6.51    1.12
 -19  -5   5    9.19    1.18
   3  -9  11    2.09    0.75
 -16  -8   4    3.96    1.00
  13  -6   8  147.20    2.80
  20  -2   0  375.03    5.95
 -18  -6   6  104.07    2.27
   9  -5  12  415.69    6.95
  -3 -12   5  590.09    8.07
 -16  -8   2    8.35    1.06
   9 -11   2   43.65    1.15
  19  -3   2   62.54    1.81
  -9  -4  16   40.94    1.62
  -9  -9  11 1032.68   13.96
 -10 -11   3  577.22    7.88
  -1  -9  12    2.15    0.87
  -5 -12   4 1105.18   14.64
   5  -3  15   16.73    1.34
  -8  -7  14   61.29    1.81
   2  -3  16    4.02    1.18
   4 -10   9  127.85    2.90
 -17   0  13    0.81    1.37
   1 -11   8  161.50    2.96
   6  -8  11   39.45    1.34
 -19  -5   2  407.90    6.26
 -18  -4  10   87.68    2.15
  18  -1   5    7.20    1.12
  11 -10   3   35.96    1.06
 -11  -6  14   51.32    1.50
 -19  -2  10   50.95    1.62
  -9   0  17   -0.81    1.84
  12 -10   1    3.52    0.75
   3  -2  16  111.27    2.56
 -12  -9   9  117.69    2.49
 -12  -8  11   23.43    1.28
 -14  -4  14  180.29    3.37
 -19  -4   8   14.05    1.15
  12  -6   9  295.26    4.64
   4  -4  15   17.70    1.34
   8  -7  11  394.13    5.92
  12  -3  11   22.90    1.34
   3 -12   4   79.42    2.80
  10   0  13    0.09    1.62
 -14  -9   6   19.85    1.15
  20   0   1   -1.03    1.78
  17  -4   5    1.40    1.12
 -17  -7   6   17.92    1.09
  -4  -5  16  450.72    8.32
 -11  -7  13  120.24    2.56
  10  -4  12   18.76    1.34
  -9 -10   9    0.50    0.97
 -13  -6  13  188.48    3.15
  14  -6   7  308.88    4.80
  -5  -5  16  200.42    3.46
 -14  -7  11   33.09    1.43
 -18   0  12  215.40    6.01
  -6 -12   3    3.02    0.87
  15  -8   2    1.93    0.84
   4  -7  13   41.88    1.43
  14  -5   8   34.77    1.46
 -18  -3  11  203.28    3.52
   6 -10   8    1.96    0.97
  13  -5   9   34.96    1.50
  -6  -9  12    0.16    1.03
  13  -9   3   68.08    1.53
   1 -12   5   14.83    0.65
   0   0  17    0.59    1.68
   6  -6  13  390.98    5.95
 -17  -1  13   90.74    2.27
  17  -5   4   13.12    1.15
  -7 -10  10  160.10    3.02
 -20  -3   1    9.19    1.22
 -15  -7  10    4.30    1.12
  15   0   9   -0.37    1.56
  -3  -5  16  228.49    4.89
  -9  -1  17    9.66    1.18
  -8  -2  17    0.06    1.15
  10 -11   0   24.34    1.18
  18  -5   2  449.84    8.13
   4  -8  12   49.29    1.56
  19  -4   1  150.37    2.99
  -8  -6  15   50.35    1.74
 -14  -2  15 1533.34   21.00
 -13  -9   8    7.95    1.06
   6 -12   1   28.92    1.12
 -16  -8   5   79.77    1.93
 -11  -9  10   33.09    1.50
  -4 -12   5  857.87   11.31
  12  -7   8  130.99    2.68
  10  -1  13    2.65    1.31
  20  -1   1   42.41    1.53
 -16  -8   1   18.29    1.28
  14   0  10  154.14    4.24
 -15  -3  14   29.63    1.37
 -16   0  14   68.55    2.49
  -6  -5  16  636.74    9.44
  19  -2   3   13.55    1.18
 -11  -3  16    3.12    1.31
 -20  -2   8  129.37    2.80
  14  -9   1  116.50    2.27
 -10 -11   4   23.12    1.22
   0  -6  15   52.13    1.68
  14  -8   4  376.87    5.64
   4 -11   7   32.78    2.12
 -17  -6   9   60.45    1.71
   8  -2  14  205.37    3.83
   8  -6  12  659.79    9.50
 -18  -1  12   69.77    1.87
  -8  -8  13   76.65    1.96
  -1  -2  17   64.69    2.03
  13  -7   7  228.90    3.96
 -19  -5   6   36.92    1.53
 -13  -5  14    4.11    1.03
  -6 -11   8   37.17    1.34
  -5  -3  17    6.64    1.09
  -4  -3  17    6.45    1.12
   1  -8  13    7.20    1.03
   0  -1  17    0.93    1.12
 -12 -10   6   34.99    1.31
   1  -7  14   18.88    1.18
  17  -7   0  102.89    2.24
   0  -9  12    3.18    0.93
   8  -8  10  155.05    2.80
 -12  -2  16   51.29    1.62
  15  -1   9   -0.09    1.03
  15  -5   7  179.54    3.46
   4   0  16  400.83    9.00
  16   0   8   77.21    3.02
 -18  -5   9   30.04    1.34
  12  -5  10   28.26    1.43
 -19  -5   1  826.93   12.21
   6  -2  15  259.31    4.64
  11  -6  10  295.14    4.86
  -9 -11   6  113.05    2.24
   1  -4  16   22.50    1.43
  18  -6   0  520.23    7.91
   2 -10  10    6.39    0.62
  -6  -3  17    2.40    1.15
  14  -1  10   71.45    2.06
 -20  -3   7    1.78    1.22
 -16  -1  14   -3.18    1.43
 -13  -7  12   73.97    1.96
 -15  -8   8  101.52    2.24
  11  -7   9    0.00    0.84
  -2  -5  16   42.69    1.74
   7 -11   5 1315.91   26.27
  -8 -11   7   35.68    1.31
  -3  -3  17    5.76    1.40
  10  -9   7   18.01    1.37
 -20   0   9   -1.00    1.46
   2 -11   8   24.77    1.40
   8 -11   4   47.27    2.21
 -11  -5  15  206.55    3.46
 -21   0   4 1129.43   21.81
  11  -9   6    0.34    0.44
  15  -6   6    4.14    1.06
  18  -2   5   50.95    1.78
   2 -12   5  114.17    3.52
  17  -3   6   20.72    1.40
 -18  -6   7   19.57    1.28
  -7  -5  16   11.44    1.22
   4  -1  16  445.76    7.07
  16  -1   8   11.53    1.25
  13   0  11    1.78    1.81
  -6 -12   4  318.01    4.89
 -21   0   3    0.25    1.59
  -7  -9  12   29.48    1.37
   5 -12   3   54.78    2.31
 -21   0   5   -0.53    1.62
   3  -5  15    0.72    1.12
   4  -6  14   69.89    2.03
  14  -7   6  309.57    4.92
 -13 -10   2   69.14    1.59
  -9  -7  14    5.17    1.15
 -13 -10   3  123.92    2.34
  -7 -12   1    2.31    0.69
 -19   0  11    0.56    1.62
 -20  -1   9    0.12    1.12
  -7 -12   2  214.25    3.40
 -21  -1   4  215.15    3.89
  10 -11   1    8.48    0.81
  -5 -12   5  710.43    9.75
 -16  -7   9    8.69    1.15
 -10  -4  16   74.94    2.24
 -20  -4   4   24.65    1.65
   6 -11   6    3.15    1.40
 -10   0  17    0.28    1.50
  -7  -3  17    3.86    1.18
   9 -10   6   87.53    2.84
 -17  -2  13   37.20    1.59
   4 -12   4   19.66    1.84
 -11  -8  12  536.19    7.82
 -16  -8   6    8.97    1.06
  14  -4   9   28.64    1.43
 -17  -7   7   36.27    1.50
   6  -9  10    0.00    1.15
   9  -9   8   46.74    2.12
 -20  -4   3  159.94    3.52
  11  -3  12   29.66    1.43
  -9  -2  17  243.63    4.42
   6 -12   2   18.04    0.78
  16  -7   3   20.22    1.12
  16  -8   0    0.06    0.87
  13  -1  11   10.03    1.31
  12 -10   2    1.03    0.69
 -21  -1   3  127.13    2.80
  -2  -3  17    4.89    1.09
 -21  -1   5    1.25    1.22
  10 -10   5    2.96    1.78
 -13   0  16    1.68    1.90
  12  -9   5   -0.12    0.65
  10  -2  13  150.47    3.12
   9 -11   3  736.42   14.30
  20  -2   1   16.89    1.18
 -10 -11   5   35.65    1.25
  -2 -12   6   13.99    0.93
   7 -12   0    8.63    0.97
 -16  -5  12   36.61    1.46
  17  -6   3  424.26    7.07
 -13 -10   1   21.09    1.03
  -1 -12   6   39.39    1.25
 -20  -4   5   11.47    1.34
  15  -4   8  241.42    4.05
  -9  -6  15   84.53    2.09
   4  -9  11   14.15    0.87
 -14  -9   7   55.40    1.62
  -8 -10  10  696.03    9.60
 -13 -10   4    7.73    1.00
 -18  -2  12   66.40    1.90
  20  -3   0   26.83    1.46
 -19  -1  11   49.20    1.84
  -1  -5  16    1.43    1.09
  17   0   7   -0.56    1.37
   1   0  17    2.12    1.46
 -10  -9  11  767.98   10.69
 -15  -9   3   58.21    1.65
   1  -9  12   38.48    1.34
  -3 -10  11    4.21    1.00
   0  -2  17   60.60    1.90
 -10  -1  17   49.48    1.84
 -19  -5   7   18.23    1.31
 -21   0   2  561.67   11.93
   7  -4  14  170.75    3.37
  13  -4  10  116.38    2.59
   8 -10   7   57.86    2.49
 -21   0   6   28.20    2.12
  -2 -11   9    2.37    0.87
  -7 -12   3   66.40    1.74
  -7 -11   8   52.85    1.59
  -3 -11   9    2.56    0.90
  15  -2   9   -0.87    1.00
  16  -5   6    7.63    1.15
 -19  -3  10    6.33    1.22
  10  -7  10  198.20    3.71
   1  -6  15   68.05    2.09
 -11 -10   8    1.00    1.00
  -3 -12   6    0.47    0.87
  11  -5  11   25.24    1.43
   3  -3  16   12.00    1.28
 -15  -9   2    5.11    0.97
  -2 -10  11   69.42    1.71
  -4 -10  11   25.99    1.22
   5 -10   9   27.48    1.34
 -15   0  15   -2.03    2.06
  19   0   4   51.41    2.56
 -13  -1  16 3232.57   39.70
  14  -2  10    1.06    1.15
   0 -12   6   82.70    1.78
 -16  -2  14    3.27    1.25
  -9  -8  13  442.80    6.42
 -20  -4   2  146.67    3.37
 -15  -9   4   19.44    1.18
 -17  -5  11  118.22    2.37
 -19  -4   9  259.93    4.27
  -8  -5  16  247.40    4.49
  12  -8   7  347.86    5.30
  19  -5   0    4.39    1.25
 -17  -4  12  322.31    4.83
 -15  -5  13   31.91    1.37
   2  -8  13   23.77    1.22
  -1 -11   9   41.22    1.31
  10  -6  11  910.16   12.46
  17  -1   7   18.42    1.28
   1  -1  17   17.14    1.28
  11  -8   8   71.88    1.90
  -4 -11   9   38.23    1.40
 -21  -1   2  775.83   11.12
 -16  -4  13    5.98    1.25
 -10 -10   9    2.52    0.97
   3 -12   5   13.87    1.87
 -13  -4  15  172.43    3.15
   2  -7  14    1.15    1.00
 -12  -6  14   38.33    1.40
 -21  -1   6    4.71    1.34
   6  -5  14   94.66    2.43
  17  -7   1  254.69    4.30
 -15  -6  12   10.25    1.09
   8  -5  13   41.91    1.53
  -8  -3  17   31.97    1.62
  14  -9   2   66.15    1.68
 -16  -6  11   25.18    1.43
   4  -2  16  225.31    3.96
  16  -2   8    2.27    0.97
  11 -10   4   18.82    1.93
  20   0   2  255.44    6.36
 -14  -3  15   50.26    1.68
  18  -4   4   60.36    1.84
 -15  -1  15   37.02    1.46
  19  -1   4    1.84    1.22
   3 -11   8  274.82    6.61
   9  -4  13  173.90    3.49
   7  -7  12  646.71    9.32
  -1 -10  11  125.26    2.46
   7   0  15    0.59    2.06
  -5 -10  11   50.54    1.50
   3 -10  10    4.49    1.34
 -20  -4   6   18.57    1.40
  12   0  12    2.31    1.68
   7 -12   1   50.82    1.46
  19  -3   3    1.59    1.15
 -12 -10   7   24.02    1.22
   5 -11   7   46.36    2.21
 -20  -3   8   12.12    1.25
  -8  -9  12   21.62    1.37
  -4 -12   6   29.69    1.22
  16  -4   7   37.52    1.56
  15  -8   3    0.09    0.84
 -12  -7  13   24.40    1.37
   8  -3  14    2.52    1.28
  16  -6   5   21.84    1.28
 -15  -9   1   18.32    1.15
  -1  -3  17   33.28    1.46
  13 -10   0    0.90    0.87
  15  -7   5  230.30    4.18
  18  -6   1   38.39    1.43
 -20  -2   9  317.39    5.36
 -21  -2   4   10.81    1.40
  19  -4   2  221.20    3.89
  13  -8   6   29.76    1.15
 -11 -11   2   14.49    1.03
   5  -4  15   45.40    1.62
   2  -4  16    6.29    1.22
 -13 -10   5  899.41   12.18
   8  -9   9    7.23    1.22
   5  -7  13    2.59    0.90
 -14  -8  10   63.41    1.68
  -6 -12   5  177.64    3.08
 -12  -3  16   36.58    1.74
   1 -12   6   33.53    0.87
   5  -8  12    5.98    0.90
   9   0  14  567.81   12.25
   7  -8  11   64.59    1.56
  13  -2  11  162.49    3.30
   0 -11   9  301.53    4.83
  20  -1   2   -0.06    1.12
   6  -3  15   15.39    1.28
 -11 -11   3  208.89    3.49
 -21  -2   3    9.66    1.18
  12  -4  11   42.41    1.50
 -21  -2   5    0.50    1.28
  13  -9   4   16.30    0.87
   7  -1  15    1.56    1.34
 -15  -9   5   11.84    1.15
   7 -10   8    7.10    0.87
  -7 -12   4   53.47    1.53
 -11 -11   1   45.12    1.31
  -5 -11   9  101.08    2.24
  12  -1  12   30.38    1.56
  10 -11   2  220.23    3.83
 -13  -8  11    3.99    1.09
  10  -8   9   27.05    1.03
 -18  -6   8    4.95    1.03
  18  -5   3   61.45    1.78
 -21   0   1   -0.06    1.40
  -9 -11   7   -0.03    0.93
   0  -5  16   48.30    1.62
 -19  -2  11   31.03    1.65
 -18  -4  11   36.24    1.43
 -21   0   7    0.50    1.62
 -16  -8   7   39.51    1.40
 -10  -2  17   82.70    2.15
 -10  -7  14   25.92    1.37
 -13  -9   9  103.07    2.31
  18  -3   5    1.00    0.97
 -20  -4   1  101.49    2.49
  -4  -8  14    2.87    1.00
  16  -8   1   14.52    1.09
   9  -1  14   53.97    1.84
 -12  -9  10    0.87    1.09
   6 -12   3    1.00    1.37
   5 -12   4   40.88    2.15
  -4  -7  15    4.49    1.09
 -14  -6  13  280.68    4.33
   0 -10  11   63.28    1.90
  -3  -8  14   82.73    2.15
 -13  -2  16   -0.44    1.22
  -6 -10  11    1.68    1.03
 -11   0  17    0.22    1.53
 -10 -11   6   16.76    1.15
 -15  -4  14   56.12    1.71
 -12  -5  15  237.40    4.11
   2  -9  12   35.80    1.34
 -11  -4  16   41.07    1.56
 -17  -6  10  297.29    4.55
  -5  -7  15   -0.53    1.15
   7  -6  13  769.54   11.19
  -5  -8  14   24.77    1.31
 -21  -1   1    3.05    1.22
  -3  -7  15    8.60    1.18
 -15  -8   9   -0.75    1.09
  -5  -4  17   11.68    1.28
  17  -2   7    2.84    1.06
  18   0   6   -2.31    1.78
 -21  -1   7   47.21    1.78
   1  -2  17    0.90    1.12
 -10  -6  15   92.98    2.12
 -17  -7   8    5.20    1.09
  -5 -12   6  194.06    3.37
  -9  -5  16   20.44    1.31
  -4  -4  17  144.67    2.99
 -11 -11   4   43.47    1.43
 -21  -2   2  128.13    2.74
 -17  -3  13  125.82    2.59
 -18  -5  10   90.52    2.18
   5   0  16  730.00   15.11
 -21  -2   6    1.87    1.25
 -20   0  10  517.58   10.59
 -18  -7   3   12.49    1.18
  -8 -12   2  196.18    3.24
  -9  -3  17   12.56    1.31
  -9 -10  10 1455.97   18.57
  -8 -12   1    2.31    0.72
   9  -7  11  181.94    4.11
  -8 -11   8    2.74    0.97
 -14  -5  14   33.90    1.43
 -18  -7   4   24.52    1.28
 -19  -5   8   92.85    2.21
  11 -11   0  212.16    3.33
  15  -9   0   37.95    1.34
   4  -5  15    3.93    1.25
 -15  -2  15  403.29    6.23
  -2  -8  14   84.19    2.09
  19  -2   4    0.22    1.06
   8 -11   5  414.10    9.32
  10  -3  13   51.26    1.74
   2  -6  15    1.87    1.22
  20  -3   1    2.06    1.15
 -11  -1  17   69.08    1.87
  -6  -4  17  153.30    3.30
  17  -5   5    0.37    1.18
 -20  -4   7  181.22    3.58
   2 -12   6    0.75    1.40
  14  -8   5   49.67    1.43
   2   0  17   -1.06    1.96
   1 -11   9  401.45    6.26
 -15  -7  11  134.11    2.56
  10  -5  12  200.23    3.86
  12 -10   3   54.93    1.31
   7 -12   2    7.48    0.59
 -19  -6   4  156.39    3.05
  -6  -7  15    2.49    1.15
 -18  -3  12   59.20    1.81
  -3  -4  17   37.33    1.56
   4 -12   5   10.44    1.84
 -19  -6   3    3.43    1.09
  18  -1   6   13.93    1.53
  -6 -11   9   70.67    1.81
   5  -6  14 1053.58   14.21
   0  -3  17   24.37    1.43
  -2  -7  15   13.30    1.31
  -6  -8  14   70.20    1.90
  13 -10   1   28.11    1.09
 -14  -9   8    1.65    1.03
   5  -1  16  297.48    5.08
 -20  -1  10   20.10    1.40
  17  -4   6    8.38    1.25
   7 -11   6  110.90    3.40
  15  -3   9   11.37    1.25
 -18  -7   2    0.47    1.12
 -10  -8  13  440.06    6.64
   9 -11   4    0.34    1.56
  19  -5   1  699.65   11.53
  -8 -12   3   57.08    1.53
  20  -2   2   26.05    1.34
   8 -12   0   13.30    1.03
 -13 -10   6   17.32    1.18
 -15  -9   6   -1.12    1.03
   3  -8  13  200.73    3.65
 -12  -8  12   42.47    1.53
 -14  -7  12   16.45    1.22
   7  -2  15   86.25    2.37
   5  -9  11   59.14    1.59
 -18  -7   5   13.02    1.12
  14  -3  10    9.53    1.34
 -16  -3  14   88.40    2.21
  12  -2  12    6.23    1.22
   2  -1  17   37.95    1.59
   0 -13   0   -0.12    1.22
 -19  -6   5   33.93    1.40
  -9  -9  12    3.27    1.15
 -11  -9  11  248.99    4.30
 -18   0  13   -2.15    2.40
   9  -8  10  193.72    3.40
   9  -6  12  733.77   10.66
   4 -11   8   12.68    1.81
   3  -7  14   65.65    1.78
  -7  -4  17    2.18    1.09
 -16  -7  10    2.68    1.15
 -19  -6   2  365.31    5.80
  -7 -12   5    0.65    0.97
   1 -10  11   14.86    0.97
   1 -13   0   37.05    1.25
  -5   0  18    3.33    1.43
  -4  -9  13   15.70    1.12
  -3  -9  13   72.16    1.90
  -1  -8  14   12.84    1.15
  -7 -10  11   19.51    1.18
   9  -2  14   17.54    1.37
  11  -4  12   16.48    1.28
   0 -13   1   17.89    1.06
  11   0  13   -2.24    1.62
   7  -9  10    0.53    1.37
   4  -3  16    2.40    1.18
  16  -3   8    3.89    1.18
   4 -10  10    0.93    1.25
  -2 -12   7   31.63    1.25
  17  -7   2  976.34   13.68
 -17  -8   3  215.53    3.77
 -17   0  14  273.42    6.64
  -4   0  18  171.44    5.23
  -2  -4  17   24.37    1.43
  -1 -13   1    7.76    0.97
   6 -10   9    9.60    1.12
  16  -7   4   64.75    1.74
   1  -5  16    9.50    1.25
 -14   0  16    0.16    2.12
  -6   0  18   51.29    2.90
  -4  -6  16   20.47    1.31
  21   0   0    9.00    1.99
 -11 -11   5   92.17    1.96
  -1 -12   7    8.04    0.84
  -7  -7  15    9.19    1.31
 -17  -8   4   50.91    1.62
  -5  -6  16   73.13    1.90
 -21  -2   1    2.06    1.06
 -21   0   8  173.06    4.58
  20  -4   0  157.45    3.08
  -3 -12   7  171.34    3.21
 -18  -1  13    4.58    1.15
 -20  -3   9    0.06    1.31
   1 -13   1   15.30    0.97
  14  -6   8   58.08    1.71
 -21  -3   4   64.09    1.99
  13  -6   9   23.81    1.28
  -6 -12   6   34.09    1.34
  -5  -9  13    1.18    0.93
 -21  -2   7  331.19    5.14
  14  -9   3    6.45    0.90
  -2  -9  13   81.17    2.06
  -1  -7  15   14.71    1.28
  17  -6   4   32.16    1.53
  -5  -1  18   94.97    2.46
  -7  -8  14    0.75    1.15
 -17  -8   2  187.80    3.30
  11 -11   1    9.57    0.90
 -19  -4  10  286.91    4.46
  -3  -6  16    6.82    1.12
  18  -6   2  309.07    5.92
   2 -13   0  116.97    2.18
   3  -4  16    1.53    1.18
 -11 -10   9    0.97    1.12
  11  -1  13   13.77    1.34
 -18  -7   1   92.14    2.03
  13  -3  11   72.07    2.03
   6 -11   7    2.34    1.65
 -17  -1  14  182.03    3.77
  -2 -13   1    7.57    0.93
  -4  -1  18  107.25    2.56
 -21  -3   3   64.97    1.96
  11  -9   7   64.06    1.37
 -12 -10   8    8.94    1.22
 -21  -3   5   73.66    2.06
  -3   0  18   71.79    2.77
  10 -11   3    3.08    1.56
  -8 -12   4    6.04    0.97
 -14  -1  16 3157.48   37.86
 -19   0  12  363.41    8.26
 -11  -2  17   27.83    1.40
  -6  -1  18  216.31    3.86
   8 -12   1   87.99    1.99
  21  -1   0    8.85    1.15
  10 -10   6   33.22    2.09
  -6  -6  16   94.10    2.18
   2 -11   9  186.24    3.74
   0 -12   7   35.71    1.12
   3 -12   6    5.86    1.78
 -21  -1   8    3.61    1.18
  13  -7   8    4.42    1.15
 -18  -7   6   59.73    1.62
 -19  -6   6   40.76    1.50
 -19  -3  11   10.13    1.28
 -13  -6  14    1.96    1.18
  -7   0  18    2.99    1.50
 -16  -8   8   65.22    1.84
  -1 -13   2  356.59    5.30
  18  -2   6    4.67    1.15
 -10  -5  16  144.27    2.77
 -20  -5   4   28.64    1.31
   0 -13   2  184.71    3.30
 -10  -3  17   38.95    1.59
  -4 -12   7  282.15    4.67
   3  -9  12   33.75    1.18
  12  -9   6   33.37    1.09
  15  -9   1    1.46    0.87
   9 -10   7  228.86    5.92
 -17  -8   5    4.42    1.09
  -7 -11   9   27.92    1.37
   5  -2  16  192.25    3.65
 -20  -2  10   40.57    1.62
  14  -5   9    0.84    1.15
 -11  -7  14   10.94    1.28
  10  -9   8   15.80    1.31
  16  -8   2   16.02    1.12
   2 -13   1    3.71    0.81
 -20  -5   3  721.65    9.91
  -8  -4  17   26.86    1.68
  20   0   3   -0.41    1.46
  15  -6   7   68.30    1.84
 -18  -6   9   36.83    1.56
  12  -6  10   96.09    2.34
 -19  -6   1   65.59    1.78
 -14  -4  15   16.64    1.34
  12  -7   9    2.27    1.09
 -14 -10   3    1.12    1.00
   6 -12   4   23.65    2.03
  -6  -9  13   18.10    1.28
  -3  -1  18   97.87    2.49
 -13  -3  16   26.27    1.56
  -1  -9  13   28.79    1.43
 -19  -1  12   34.65    1.50
 -14 -10   2   74.25    1.74
  11 -10   5   13.27    1.74
   2  -2  17    7.70    1.18
 -10 -11   7    5.64    1.09
  -2 -13   2  536.59    7.67
  19  -4   3    1.56    1.22
  -2  -6  16   17.64    1.40
 -13  -7  13    1.43    1.12
 -20  -4   8   13.93    1.22
  14  -7   7  137.22    2.74
 -20  -5   5    0.84    1.22
  15  -5   8    5.11    1.15
   1 -13   2   30.44    1.12
   0  -8  14    3.40    1.00
  15  -8   4   56.21    1.62
   8  -4  14  184.62    3.80
  -1  -4  17  145.45    3.43
  -7  -1  18  606.70    9.50
 -12   0  17   -0.12    1.53
 -11  -6  15   57.80    1.78
  17  -3   7    0.37    1.25
   1  -3  17    4.52    1.12
   7 -12   3   38.54    1.99
   6  -8  12    0.41    0.81
   6  -7  13  265.76    4.46
 -21  -3   2   81.64    1.96
 -17  -8   1   25.02    1.25
   7  -5  14  212.66    4.02
  13  -5  10    6.89    1.15
  -3 -13   1   -0.06    0.87
 -21  -3   6   -0.84    1.15
  -9 -11   8  172.87    3.24
 -12  -4  16    9.75    1.15
   3 -13   0   87.49    1.87
 -16   0  15   -0.75    1.81
  -7  -6  16  111.67    2.59
  20  -1   3    7.51    1.15
  -2   0  18   85.16    3.27
  -8  -7  15    6.33    1.31
   5 -12   5   50.45    2.49
 -14 -10   4  102.64    2.12
   6  -4  15    5.95    1.18
  19   0   5    1.81    1.78
 -15  -3  15   52.91    1.78
  13 -10   2   18.38    0.90
  19  -3   4   72.85    2.03
 -10 -10  10 1206.11   15.39
 -15  -9   7   -0.03    1.03
   2 -10  11    7.76    0.78
   1 -12   7    2.77    0.81
   3  -6  15   45.49    1.62
 -20  -5   2  348.42    6.70
  -8 -10  11   -0.03    1.15
   0  -7  15   14.15    1.22
 -19  -5   9    4.46    1.40
 -17  -7   9   64.62    1.81
   8  -7  12  925.89   15.52
 -18  -2  13   40.79    1.65
  15   0  10   11.12    1.99
 -17  -5  12    7.07    1.28
 -13 -10   7   51.54    1.71
 -14 -10   1   25.08    1.22
  -8   0  18    2.27    1.90
 -12  -1  17   92.73    2.49
  -8  -8  14    0.69    1.09
   8 -10   8    4.71    1.00
  -3 -11  10    1.00    0.93
  16   0   9    1.09    1.74
 -16  -5  13   21.25    1.31
  -5 -12   7  350.51    5.42
   3   0  17    1.06    1.65
  18  -4   5   64.56    1.87
 -13  -5  15  141.34    2.74
  -5  -2  18    6.11    1.50
  -3 -13   2  437.41    6.61
  13  -9   5    0.25    0.75
  -2 -11  10   15.98    1.06
 -16  -1  15    2.74    1.28
  -2  -1  18    2.77    1.25
   2 -13   2    1.65    0.72
  11  -2  13  106.94    2.62
  20  -3   2   21.16    1.34
   3 -13   1    1.59    0.69
  -9 -12   2    0.50    0.90
 -17  -2  14   34.84    1.62
  18  -5   4    1.87    1.15
 -12 -11   2  119.46    2.52
  19  -1   5    1.28    1.18
 -11 -11   6  107.87    2.18
  -4  -2  18   51.60    1.74
  11  -7  10   82.32    2.18
   8   0  15   -0.75    2.06
   8  -8  11  156.01    2.96
  -1 -13   3  194.59    3.37
   9  -9   9   10.25    1.25
   9  -5  13   56.21    1.93
   7  -3  15    2.84    1.15
  18  -7   0    0.44    0.97
 -14  -2  16    1.50    1.18
 -10  -9  12   11.75    1.22
  -6  -2  18   26.42    1.46
 -17  -8   6    1.25    1.03
 -20  -5   6  162.78    3.08
  -9 -12   1    4.89    0.84
  21  -2   0   29.69    1.50
  12  -3  12   12.06    1.34
 -16  -6  12   19.04    1.37
 -11  -8  13  100.80    2.34
 -12 -11   3  295.76    4.61
  -4 -11  10    3.58    0.97
  -7 -12   6    0.78    1.00
   0 -13   3   15.70    0.97
  16  -5   7   16.92    1.25
  -7  -9  13   30.69    1.43
 -14  -8  11   37.27    1.53
 -13  -9  10    0.90    0.97
 -21  -2   8   23.46    1.37
  -8 -12   5    0.19    0.90
  15  -1  10   62.41    1.81
  -1  -6  16   21.13    1.56
   0  -9  13    0.00    0.97
  -8  -1  18   74.91    1.90
   4  -8  13    4.27    0.87
  19  -5   2  103.98    2.46
   8 -12   2   14.61    2.09
  -2 -13   3  485.93    7.04
   5 -11   8   66.00    2.74
   5  -5  15    4.92    1.43
   2  -5  16   27.76    1.56
 -19  -6   7  172.31    3.15
  15  -7   6   11.28    1.09
  12 -10   4   27.95    0.81
  16  -1   9    3.61    1.22
 -17  -4  13   53.47    1.78
  14   0  11    0.47    1.53
   3  -1  17   16.20    1.34
  -1 -11  10   19.16    1.06
  11 -11   2    8.41    0.75
 -15  -8  10   48.61    1.65
  16  -6   6    2.49    0.97
 -18  -7   7    1.28    1.22
   9  -3  14    4.42    1.18
 -12 -11   1  121.89    2.52
  -9  -4  17    9.35    1.53
  -9 -12   3    6.76    0.93
  11  -6  11  214.22    3.96
 -16  -9   3    9.25    1.12
 -14 -10   5  326.92    4.89
   8  -1  15    0.87    1.28
  12  -5  11    1.03    1.09
  -3  -2  18   24.37    1.50
   3 -11   9   71.79    1.93
  12  -8   8    2.12    0.90
  10  -4  13    9.66    1.31
  20  -4   1   68.80    1.96
  21   0   1   -1.06    1.68
 -19  -2  12   65.06    2.12
 -14  -9   9   40.69    1.53
 -20   0  11    0.97    1.71
   4  -7  14    9.82    1.15
  -4 -13   1    7.45    0.90
 -17  -6  11   10.78    1.34
   1 -13   3    1.96    0.75
   6   0  16   51.26    2.68
  17   0   8  294.27    7.20
  -8  -6  16  125.57    2.49
   4 -12   6  109.40    3.43
 -21  -3   1    0.87    1.06
 -21   0   9   -0.56    1.90
  19  -6   0  786.46   10.91
 -18  -4  12  284.58    4.42
 -16  -9   4    1.59    1.09
 -15  -6  13  125.26    2.62
  13  -8   7  264.85    4.39
  -7  -2  18   52.53    1.93
 -16  -9   2   56.99    1.62
 -18  -5  11   40.97    1.59
   4 -13   0    1.68    0.75
  -1   0  18    1.59    1.68
   5 -10  10    0.87    1.15
 -21  -3   7   -1.34    1.28
   9 -12   0    1.96    0.93
   0  -4  17   66.99    1.96
  -8 -11   9   73.66    2.03
 -12 -11   4   15.30    1.09
  -5 -11  10    2.71    1.06
  -3 -10  12    0.75    0.97
   1  -8  14   42.94    1.59
   6  -9  11   17.45    0.84
  17  -8   0    7.60    1.15
  14  -1  11   36.27    1.62
   9 -11   5   12.84    1.90
   6  -6  14  473.59    7.20
 -20  -5   1  527.43    8.35
   2 -12   7    1.74    1.40
  15  -4   9    1.22    1.12
   8  -6  13 1785.36   23.71
  -4 -10  12    0.56    1.06
  14 -10   0    5.55    0.87
   8 -11   6  130.87    4.14
  -3 -13   3  837.90   11.34
  20  -2   3    3.52    1.15
 -12  -9  11    7.01    1.22
  -4 -13   2   79.02    1.87
  10   0  14   68.43    2.87
  21  -1   1  103.70    2.49
 -11  -3  17    0.12    1.15
  14  -4  10  159.72    3.12
 -20  -1  11   13.68    1.46
 -15  -5  14    8.10    1.37
 -16  -4  14    7.42    1.18
  -2 -10  12    0.47    1.06
 -13  -8  12    4.21    1.12
  11  -8   9    1.81    0.81
   3 -13   2   26.98    1.22
  -9   0  18   31.41    2.12
  17  -7   3    2.31    1.06
 -11  -5  16  165.24    3.33
   6  -1  16   59.14    1.90
  17  -1   8    2.99    1.15
  -9  -7  15    1.12    1.25
 -21  -1   9   -0.25    1.25
  -6 -12   7  140.47    2.77
   0 -11  10   13.18    0.87
  15  -9   2   -1.37    0.87
 -12  -2  17  225.34    3.96
  -5  -5  17    2.12    1.28
  -1  -1  18   18.17    1.40
  18  -3   6   58.08    1.74
  -4  -5  17    4.33    1.18
   5  -3  16   15.17    1.40
 -20  -3  10  131.52    2.87
  -5 -10  12   15.89    1.12
  12 -11   0    1.96    0.84
 -16  -2  15    4.05    1.28
  -9 -12   4   53.50    1.53
   1  -7  15   11.81    1.15
   4  -9  12    2.06    0.78
   4 -13   1    2.27    0.97
  -2  -2  18   16.20    1.53
   4  -4  16    0.59    1.25
  16  -4   8    1.93    1.18
   7 -10   9    0.28    1.06
  19  -2   5  122.33    2.87
  10 -11   4   41.38    2.37
 -16  -9   5   17.95    1.18
   2 -13   3    0.00    0.84
  10  -1  14    9.13    1.43
 -16  -9   1   78.30    1.96
  -6  -5  17    8.29    1.53
 -20  -5   7  131.15    2.71
  14  -8   6    2.49    0.90
 -22   0   4   16.39    1.68
   2  -3  17  120.09    2.74
  -9  -8  14    4.61    1.12
  -9  -1  18    0.75    1.22
  14  -9   4   33.25    1.22
  13   0  12   34.40    2.31
   3 -10  11    0.19    0.53
  18  -6   3  509.55    8.23
  -8  -9  13    1.22    1.18
   0  -6  16    0.19    1.25
  -3  -5  17   29.94    1.56
  15  -2  10   92.98    2.18
   7 -11   7   16.51    1.93
  -8  -2  18   33.22    1.43
 -20  -4   9    6.11    1.09
 -21  -4   4   17.95    1.56
  10  -7  11   81.39    2.52
 -16  -8   9    0.62    1.03
  -9 -10  11  142.30    2.80
   1  -9  13    0.84    0.97
  -1 -10  12   -0.19    0.84
 -22   0   5    0.09    1.56
  16  -2   9   34.56    1.53
  -1 -13   4   44.56    1.34
   3  -2  17    1.99    1.09
 -12  -7  14    8.44    1.18
  -6 -11  10    5.70    1.12
 -15  -7  12   62.38    1.87
  17  -5   6   11.65    1.34
   8  -9  10   13.68    0.56
  -2 -12   8    0.97    0.81
 -17  -8   7   27.67    1.40
   7 -12   4   22.96    2.09
 -16  -7  11   32.84    1.37
 -12 -10   9    5.76    1.18
  16  -8   3   40.16    1.53
  -4 -13   3  468.04    7.04
 -22   0   3   -0.19    1.90
  13  -4  11  193.47    3.61
   9 -12   1   19.35    1.00
 -15   0  16    2.90    1.56
 -21  -4   3  187.98    3.58
  -2 -13   4  537.25    7.91
   8  -2  15    0.34    1.34
 -12 -11   5   -0.22    0.97
  -3 -12   8   26.64    1.25
 -21  -4   5  383.97    7.17
 -14 -10   6    3.30    1.12
   0 -13   4   26.70    1.06
 -12  -6  15  160.94    3.05
 -22  -1   4  260.58    4.42
 -15  -9   8   15.39    1.22
   6 -12   5    8.88    1.68
  -1 -12   8    9.82    0.84
  13  -1  12   27.92    1.46
 -18  -3  13   70.42    1.93
 -10 -11   8   14.05    1.18
  16  -7   5   -0.06    1.00
 -19  -4  11  222.94    3.77
  18   0   7   -0.12    1.62
  18  -7   1  456.57    7.23
  -5 -13   1   17.32    0.93
  -6 -10  12   30.57    1.40
  13 -10   3   98.74    2.06
  -9  -6  16   17.67    1.34
 -13   0  17   -1.31    1.62
 -22  -1   5    7.38    1.37
 -10  -4  17   91.11    2.46
  -7  -5  17   18.76    1.25
  14  -2  11  170.60    3.46
 -18  -6  10  243.85    3.99
  -5  -3  18   15.49    1.31
  -8 -12   6    2.21    1.00
  10  -8  10  125.82    2.49
  11  -5  12   42.13    1.62
 -11 -11   7   26.30    1.34
   0   0  18   28.14    2.18
   1 -11  10    3.33    0.62
  11  -3  13   85.84    2.24
 -14  -6  14   32.65    1.59
 -19  -6   8    9.72    1.15
 -22  -1   3   10.87    1.25
   8 -12   3   34.59    2.09
   5 -13   0   22.50    1.22
 -15  -1  16 1442.39   18.94
 -17  -3  14   12.28    1.28
 -13 -10   8   39.23    1.46
  -4  -3  18   18.48    1.53
   4  -6  15  314.24    5.27
  -2  -5  17   89.12    2.37
 -22   0   6  374.75    7.76
  -5 -13   2    2.34    0.93
  -4 -12   8   39.76    1.40
 -13  -4  16    3.86    1.06
 -11 -10  10  473.96    6.98
  -3 -13   4  865.51   12.90
  21  -2   1   21.25    1.37
 -14  -3  16    9.25    1.22
 -20  -2  11    7.14    1.31
  17  -6   5   26.67    1.34
   3 -12   7   -0.44    1.71
  -6  -3  18  104.57    2.74
  21  -3   0   16.70    1.31
  10  -6  12  397.09    6.45
  14 -10   1    6.73    0.97
   6  -2  16   16.11    1.34
  17  -2   8    2.65    1.12
 -18  -7   8   15.49    1.31
   1 -13   4    0.03    0.62
   4 -13   2   80.14    1.93
 -21  -2   9  130.49    2.84
 -21  -3   8    9.00    1.40
  20  -5   0  102.05    2.52
  18  -1   7    1.06    1.18
  17  -4   7   13.43    1.18
  -1  -2  18    1.59    1.15
   1  -4  17    1.34    1.18
 -13  -1  17  174.74    3.58
   0 -12   8    1.12    0.65
   3 -13   3   17.14    0.97
 -21  -4   2    4.14    1.28
   4 -11   9   71.14    1.81
   0 -10  12    8.32    1.06
   2  -8  14   -0.44    1.00
 -11  -9  12   31.84    1.46
 -16  -9   6   53.19    1.56
 -21  -4   6  111.92    2.68
  17  -8   1    0.62    1.03
  11 -11   3   25.83    2.21
 -22   0   2  388.15    9.97
 -10   0  18   26.86    2.37
 -19  -5  10   35.93    1.46
  12 -11   1   12.03    0.78
   0  -1  18  155.14    3.15
   3  -5  16   88.09    2.12
  19  -6   1  190.66    3.77
  -9 -12   5    5.11    0.93
  20   0   4    0.65    1.93
  16  -9   0    9.72    1.03
   4   0  17   -0.93    1.90
 -14  -7  13   14.33    1.43
  -7 -12   7  160.13    2.93
 -15  -4  15    7.79    1.40
 -22  -1   6   37.02    1.62
   5 -12   6  126.79    3.74
  -3  -3  18    7.95    1.37
  19  -4   4  159.85    3.27
  10  -2  14    0.34    1.31
   7  -8  12   97.12    2.21
 -19  -3  12   45.15    1.71
  -9  -2  18  102.92    2.74
  -9 -11   9  173.68    3.18
 -17  -7  10   25.33    1.37
   7  -7  13  440.62    7.45
 -12  -8  13   22.81    1.46
  15  -8   5   39.91    1.43
  -7  -3  18  430.40    6.76
  10 -10   7  102.39    2.43
   6 -11   8  110.02    3.37
 -10  -7  15    7.91    1.37
 -18   0  14  213.50    5.42
   5 -13   1   -0.09    0.87
  11 -10   6   58.61    1.65
   5  -8  13   21.62    1.15
  -7 -11  10   10.78    1.15
  -5 -13   3   36.67    1.37
 -22  -1   2   23.87    1.37
 -10  -1  18    8.54    1.22
  -8  -5  17    0.47    1.31
  -5 -12   8   53.81    1.65
 -10 -12   2  300.25    4.52
  20  -3   3   37.95    1.65
  20  -1   4    2.49    1.37
   4  -1  17   14.46    1.25
 -19   0  13    0.72    2.43
  20  -4   2  179.73    3.49
  -4 -13   4  574.92    8.51
 -14  -5  15   96.81    2.27
  -7 -10  12    4.27    1.22
   7  -4  15   23.00    1.46
   2  -7  15   52.10    1.68
   1  -6  16   92.42    2.52
  21   0   2    9.53    1.74
  12  -4  12    8.26    1.31
 -22  -2   4  273.27    4.67
  -9  -9  13   43.12    1.62
  19  -5   3    2.24    1.25
 -20  -5   8    0.44    1.12
 -10 -12   1    7.60    1.03
  12  -9   7   54.75    1.43
 -19  -7   4  305.36    4.99
  13  -2  12   62.85    1.99
   2 -13   4   29.45    1.15
   8  -5  14  182.25    3.71
  -1  -5  17   28.51    1.46
   2  -9  13    1.59    0.93
 -19  -7   3   29.54    1.40
 -12  -3  17  116.32    2.80
 -21   0  10    7.76    1.90
   9 -12   2    0.50    1.43
  12   0  13   -0.65    1.56
 -18  -1  14  122.64    2.87
 -10 -12   3   11.78    1.03
  11  -9   8    5.83    0.59
   5  -7  14   11.97    1.34
 -22  -2   5    2.03    1.40
 -12 -11   6  207.80    3.43
 -22   0   7    0.62    1.90
 -10  -8  14   12.46    1.34
   1 -12   8   38.29    1.34
 -12  -5  16  115.26    2.65
   6 -10  10    2.59    1.22
   9 -10   8   37.39    1.59
 -16  -3  15   70.79    2.06
   9  -4  14  311.28    5.30
  -2  -3  18   -0.09    1.12
 -22  -2   3   49.08    1.84
 -19  -1  13  141.56    2.84
  -4  -8  15  141.34    2.93
 -15  -2  16    7.17    1.37
   6  -5  15    1.18    1.22
  19  -3   5   -0.56    1.18
  12 -10   5    3.74    1.12
   2 -11  10    2.43    1.31
  21  -1   2   11.59    1.43
  -5  -8  15  203.91    3.61
 -19  -7   5   43.75    1.65
  15  -9   3    2.27    0.90
   4 -10  11    6.76    1.40
 -21  -4   1   21.38    1.50
 -14 -10   7   89.08    2.06
  -3  -8  15  139.47    2.99
 -17   0  15    1.06    1.68
  15  -3  10   73.26    2.15
   9  -7  12  667.74   10.63
  18  -2   7    0.69    1.34
  -1 -13   5   41.85    1.31
  -8  -3  18  289.25    4.77
 -21  -1  10    3.43    1.12
  -6 -13   1    6.64    0.87
  12  -1  13   45.37    1.74
 -21  -4   7   35.05    1.74
 -10  -6  16  161.19    3.33
 -20  -6   4  273.02    4.55
 -17  -8   8   20.44    1.31
  13  -9   6    2.27    0.78
 -13  -2  17  405.26    6.20
  -2 -13   5   82.29    1.96
 -10 -10  11  139.66    2.84
 -15 -10   3    5.52    1.06
   1 -10  12    9.29    0.97
 -22  -1   7    5.55    1.25
  16  -3   9   17.11    1.50
 -19  -7   2   65.68    1.87
   3  -3  17  295.17    4.95
  18  -5   5    0.41    1.25
 -14  -9  10    2.87    1.00
 -22   0   1    0.25    1.74
  14  -6   9  103.01    2.31
 -18  -8   3  268.53    4.27
   5  -9  12    7.51    0.87
 -20  -6   3   29.51    1.46
  10 -12   0   27.36    1.28
   0  -2  18    4.30    1.25
   9  -8  11   24.58    1.15
  -6 -13   2    3.27    0.84
 -18  -8   4  112.70    2.49
 -15 -10   2  157.26    3.05
   4 -13   3  253.26    4.36
   7  -9  11    1.31    0.62
   1   0  18   28.92    2.24
   8  -3  15    1.78    1.12
  19   0   6    7.23    1.59
 -22  -2   6  201.32    3.68
   0 -13   5   -1.09    0.75
 -11  -4  17   97.75    2.68
   6 -13   0   30.82    1.31
  -4  -7  16    0.09    1.12
 -13 -11   2   27.05    1.34
 -15  -8  11  104.66    2.52
 -13 -11   3   23.71    1.28
   5 -13   2   93.17    2.15
 -13  -9  11   83.10    2.12
  10  -9   9    3.02    0.50
 -15 -10   4   10.03    1.15
 -20  -6   5   34.15    1.43
 -10 -12   4    8.29    1.09
  15  -6   8   18.60    1.37
  -5  -7  16    6.01    1.22
   4 -12   7   -0.53    1.87
  -6  -8  15  194.28    3.58
 -17  -1  15    3.46    1.56
  -3 -13   5  188.45    3.49
  -6 -12   8    1.62    1.09
  14  -7   8   18.98    1.50
  13  -7   9  210.95    4.18
  18  -4   6   15.14    1.28
 -16  -9   7    3.02    1.09
  -2  -8  15  147.23    3.15
  -5 -13   4  217.62    3.93
   9 -11   6    2.21    1.84
 -17  -5  13    6.67    1.22
  14  -3  11    2.46    1.28
   7   0  16  113.14    3.89
 -20   0  12  369.61    8.54
  17  -7   4   63.35    1.81
   7  -6  14  571.21    8.35
  13  -6  10   44.90    1.68
   9   0  15   -0.31    2.12
 -22  -1   1    4.24    1.43
   5  -4  16    6.08    1.18
 -20  -4  10    7.14    1.34
 -22  -2   2   69.36    2.03
  -4  -9  14  187.02    3.65
 -10  -2  18    6.79    1.40
 -18  -8   2  204.25    3.61
  16  -9   1   14.24    1.15
  -3  -7  16   17.11    1.22
  -9  -5  17   42.50    1.84
  18  -7   2  791.07   11.31
  14 -10   2   -0.16    0.81
  20  -2   4    8.01    1.40
   4  -2  17   11.09    1.28
  12 -11   2  153.74    3.15
   1  -1  18  290.47    5.20
  19  -1   6   39.79    1.68
  -3  -9  14   39.95    1.56
  10 -11   5   33.28    2.18
  -9 -12   6    1.31    1.12
 -14  -8  12    0.34    1.22
   3 -13   4   10.56    1.87
  10  -5  13   13.71    1.37
 -18  -8   5   22.59    1.25
  20  -5   1  601.43    9.69
  21  -3   1   86.31    2.09
 -11   0  18   34.34    2.21
 -20  -3  11   -1.00    1.18
   2  -4  17   48.95    1.81
  -6  -7  16    5.23    1.25
 -20  -6   2  303.49    5.11
 -13 -11   1  129.34    2.68
   7 -12   5   -0.56    1.62
  -8 -12   7  121.61    2.46
  -8 -10  12    5.45    1.18
   6  -3  16   -0.72    1.22
  17  -3   8    7.26    1.12
 -19  -6   9    3.15    1.15
  -5  -9  14  103.39    2.21
 -21  -3   9   20.78    1.53
  -8 -11  10  270.49    4.49
 -13 -11   4   33.75    1.43
 -18  -5  12   19.63    1.34
  -6 -13   3   18.48    1.12
 -15 -10   1    1.43    0.93
 -17  -6  12   27.98    1.59
 -19  -7   6   11.06    1.31
 -13  -7  14   45.65    1.68
 -15  -9   9  264.23    4.42
   2 -12   8    5.80    1.96
   8 -12   4    5.42    1.62
  -1  -3  18    3.89    1.37
   1 -13   5   56.99    1.74
 -18  -2  14   95.85    2.43
   3  -8  14   28.51    1.34
  -3 -11  11   65.09    1.74
   0  -5  17    7.54    1.28
 -16  -8  10   54.59    1.84
   8 -10   9    3.65    1.40
 -16  -6  13   40.16    1.65
   7  -1  16   15.45    1.37
 -20  -1  12   58.08    2.03
   8 -11   7   14.15    2.06
   9  -1  15   -0.09    1.18
 -13  -6  15  504.81    7.23
  15  -5   9    2.34    1.25
 -11 -11   8   39.82    1.59
  15  -7   7    2.12    1.18
 -18  -7   9   72.48    1.90
  -2 -11  11   13.90    1.09
 -19  -2  13   84.66    2.24
  17  -8   2   38.01    1.46
  12  -7  10   20.00    1.34
 -19  -7   1  369.20    6.04
  18  -6   4   14.99    1.22
  -4 -11  11    0.56    1.06
   5 -11   9    6.17    1.59
   6 -13   1   10.00    0.97
  -2  -9  14    6.48    1.06
  10  -3  14   37.61    1.74
   9  -6  13 1458.62   19.72
  -4 -13   5  288.50    4.80
  13 -10   4   64.81    1.43
  16  -8   4    9.22    1.03
 -15 -10   5   37.45    1.40
 -11  -1  18   82.98    2.37
  14  -5  10  250.36    4.39
  21  -2   2   28.45    1.46
 -16  -5  14   12.81    1.50
 -20  -6   6   55.99    1.81
  14  -9   5   96.03    1.96
  -9  -3  18   67.80    1.93
  -2  -7  16   24.49    1.37
  -7  -8  15   23.12    1.46
 -22   0   8    2.34    2.03
  16  -6   7    1.56    1.15
 -14   0  17   -2.40    1.74
 -18  -4  13   -1.09    1.15
 -21  -2  10   10.53    1.50
 -11  -7  15    6.76    1.46
  10 -12   1  109.24    2.40
  12  -2  13   11.93    1.40
  19  -6   2  380.55    6.64
   6 -12   6   38.17    2.37
  -1  -8  15  130.31    2.77
   5  -6  15 1132.70   15.80
   2  -6  16  328.29    5.52
 -22  -2   7    1.84    1.34
 -13 -10   9   19.47    1.18
  -6  -9  14    3.40    1.25
 -10 -11   9  192.19    3.40
  -5  -4  18    8.51    1.25
 -10  -9  13   37.36    1.68
 -12 -10  10  162.25    3.05
  -7  -7  16   31.66    1.65
  11  -4  13   -0.25    1.34
   4  -5  16  149.03    3.37
 -18  -8   1   16.36    1.18
  16  -5   8   26.36    1.65
  11 -11   4    6.33    1.53
 -17  -4  14    1.37    1.25
  -4  -4  18    3.40    1.31
  12  -6  11    5.55    1.18
   3  -9  13    1.25    0.97
 -12  -9  12    9.29    1.37
  -1 -11  11    1.62    0.90
   9 -12   3   34.15    2.24
 -14  -4  16   -0.03    1.12
  -5 -11  11  128.03    2.65
   3 -11  10    1.00    1.09
   3  -7  15   67.86    2.09
 -10 -12   5    8.54    1.09
  -6  -4  18   36.46    1.59
  21  -4   0   12.12    1.25
 -22  -3   4   19.82    1.46
   2 -10  12    1.56    0.81
 -12 -11   7    1.87    1.15
 -22  -1   8   74.22    1.96
  13  -3  12   15.02    1.43
 -21  -4   8  227.46    4.24
 -14  -1  17  157.51    3.15
  13  -8   8   37.58    1.37
 -17  -2  15    1.00    1.18
   9  -9  10   31.56    0.97
 -18  -8   6    2.96    1.15
  13 -11   0  205.96    3.52
 -20  -5   9   47.11    1.71
 -18  -6  11   19.91    1.31
 -21  -5   4   22.34    1.31
 -16   0  16   24.49    2.59
 -22  -3   5  158.54    3.12
 -13 -11   5   32.47    1.40
 -22  -2   1   24.93    1.50
   2 -13   5    7.70    1.81
  -2 -12   9   15.89    1.03
  22   0   0  656.24   13.68
  -7 -12   8   59.55    1.71
 -20  -6   1    5.02    1.28
  -3 -12   9   -0.09    1.00
 -11  -8  14    0.00    1.25
  -1  -9  14   10.16    1.15
 -22  -3   3   49.42    1.90
  13  -5  11   29.76    1.53
   5   0  17    0.90    1.90
 -17  -9   3   93.01    2.12
 -15  -3  16  171.25    3.18
  12  -8   9   -0.75    0.93
  15 -10   0   13.55    1.18
  -6 -13   4  101.86    2.24
 -21  -5   3  294.08    5.89
   1  -2  18   38.36    1.74
  19  -2   6   20.97    1.37
   5 -13   3  701.77   13.77
 -21  -5   5   82.67    2.15
  -3  -4  18    3.43    1.25
  11   0  14   91.67    3.40
 -19  -4  12    4.92    1.40
   7 -11   8   51.69    2.59
 -15  -6  14   23.53    1.34
 -16  -7  12    3.99    1.40
 -11  -6  16  358.24    5.42
 -17  -9   4   -0.47    1.09
 -13  -8  13   27.11    1.43
  14  -8   7    1.99    0.90
  -7 -13   1   25.92    1.34
 -19  -5  11   61.63    1.84
  18  -3   7   -0.53    1.31
  -7  -4  18   59.67    1.81
  -1  -7  16   13.34    1.25
  16   0  10  205.37    5.76
  -1 -12   9   65.25    1.68
  -5  -6  17   12.28    1.43
  -7 -13   2    3.12    0.93
  -5 -13   5   66.06    1.68
 -13  -3  17  200.07    4.33
  -4  -6  17    6.26    1.22
 -16  -1  16  323.03    5.30
   6  -8  13   13.46    1.06
  -4 -12   9   -0.59    1.06
 -10  -5  17   10.84    1.50
 -19  -7   7   23.56    1.40
   4 -13   4   57.83    2.52
   7  -2  16   12.15    1.43
 -20  -2  12  914.61   13.52
   9  -2  15   12.68    1.46
 -14 -10   8    0.75    1.18
  -7  -9  14  109.77    2.52
 -17  -9   2   13.30    1.25
  22  -1   0  215.47    4.27
  16  -7   6   79.99    2.18
   0  -3  18    3.52    1.43
  11  -7  11  207.11    4.14
  20  -4   3   22.31    1.43
   6 -13   2   98.74    2.21
  -8  -8  15    3.27    1.25
   2   0  18   45.46    2.46
   5  -1  17    2.37    1.18
   0 -11  11    0.34    0.90
 -15 -10   6   26.14    1.28
 -22  -3   6   27.98    1.40
   3 -12   8   -0.37    1.65
 -13  -5  16   32.28    1.71
  11  -1  14   90.21    2.37
  -6 -11  11   97.56    2.37
   5 -10  11   19.32    1.46
  15   0  11    1.28    1.84
 -11  -2  18  199.61    3.83
  -6  -6  17   35.58    1.50
 -20  -6   7   43.75    1.68
  -2 -13   6   86.03    1.90
   7 -13   0    9.29    1.09
  17   0   9   -0.41    1.68
   5 -12   7   -0.41    1.90
 -17  -7  11    3.43    1.15
  -1 -13   6    3.96    0.87
  21   0   3   -1.18    2.09
   0  -8  15  164.86    3.08
  -8  -7  16   86.40    2.18
  -9 -10  12   74.66    2.03
 -17  -8   9   16.30    1.31
 -11 -10  11   79.49    2.03
   8  -8  12  260.46    4.58
  19  -7   0   25.39    1.37
  -3  -6  17   11.62    1.40
 -15  -7  13   29.98    1.50
  16  -1  10  102.64    2.68
 -12  -4  17   34.93    1.53
 -16  -9   8   71.73    1.93
  17  -5   7    3.43    1.15
   1  -5  17  109.93    2.71
 -11 -12   2  358.27    5.42
 -21  -5   2  177.95    3.68
 -21   0  11   -0.69    1.96
 -17  -9   5   26.42    1.34
 -21  -5   6   14.49    1.37
   6  -7  14   28.20    1.50
  -4 -10  13   37.76    1.43
  -7 -13   3  305.52    4.86
  -3 -10  13   35.09    1.43
  17  -6   6    4.95    1.12
 -22  -3   2   13.18    1.43
 -10  -3  18   11.34    1.43
   8  -7  13  319.44    5.76
  16  -9   2   76.28    1.87
 -16  -4  15   58.42    1.93
  -9 -11  10   39.60    1.50
  -3 -13   6  628.29    9.10
  -2  -4  18   17.60    1.74
   7 -10  10   62.44    2.18
  20  -3   4  165.52    3.52
   2  -1  18  193.47    3.61
   4  -3  17  118.84    2.62
   0 -12   9   64.37    1.68
  19  -4   5  103.07    2.43
  11  -8  10  112.64    2.68
 -11 -12   3    2.77    1.00
 -15  -5  15   22.75    1.40
  -5   0  19    1.15    1.62
  20   0   5   -2.43    1.59
  19  -5   4    3.89    1.18
  15  -1  11   25.96    1.62
  18  -8   0    0.87    1.12
   0 -13   6   70.26    1.65
 -11 -12   1    0.97    1.00
  -5 -12   9    1.93    1.09
  10 -12   2    1.53    2.06
  17  -1   9    2.49    1.43
 -12   0  18   46.21    2.34
  12 -11   3   89.12    3.93
 -22  -2   8    9.47    1.34
  21  -1   3    1.53    1.34
  -6   0  19    0.84    1.87
   0  -9  14   17.11    1.18
  15  -9   4   36.55    1.43
  -9 -12   7    0.78    1.18
 -14  -2  17  500.01    7.73
  15  -4  10    0.22    1.22
  -8  -4  18    0.78    1.31
  -5 -10  13    6.29    1.22
 -18  -3  14  105.82    2.46
  14 -10   3    0.72    0.84
  -4   0  19   -0.59    2.06
  -2 -10  13    1.43    1.03
   6  -9  12   14.21    0.90
  -7  -6  17  134.17    2.80
  15  -8   6   12.21    1.09
  16  -4   9   21.19    1.37
 -17  -9   1   43.50    1.50
 -21  -1  11   13.27    1.40
  13 -11   1    2.03    0.84
   3  -4  17  168.79    3.33
   3 -13   5    0.09    1.74
 -18  -8   7   -0.06    1.28
  11  -6  12   85.19    2.18
 -19  -3  13  217.74    3.80
  20  -5   2   42.47    1.68
 -13 -11   6  113.51    2.31
  11 -10   7   45.02    1.74
   8  -4  15   61.41    1.96
  -2  -6  17   51.38    2.12
  -5  -1  19  132.15    3.08
  20  -1   5    1.31    1.22
 -22   0   9    0.22    1.59
   7  -5  15    1.22    1.28
 -10 -12   6    0.84    1.12
  21  -3   2    2.34    1.15
   4  -8  14    2.62    0.97
  12  -5  12   23.31    1.53
   7 -13   1    0.65    0.81
 -12  -1  18  139.69    3.12
  14   0  12  148.69    4.30
  -4 -13   6 1373.18   18.63
  -6  -1  19    2.46    1.40
  18  -7   3    1.12    1.09
  -7   0  19   -1.28    1.99
   0  -7  16   11.59    1.34
  20  -6   0  771.72   10.81
  18   0   8  182.09    4.92
 -21  -3  10   23.40    1.62
  12  -3  13   13.15    1.40
  -4  -1  19    0.34    1.43
 -11 -12   4  237.40    3.93
 -16  -2  16   71.57    2.24
  -8  -9  14   23.03    1.50
 -22  -3   7   -1.68    1.22
  14  -4  11   71.14    2.15
   3 -10  12   -0.12    0.81
  12 -10   6   65.75    1.96
  15 -10   1    3.46    0.93
   1 -11  11    1.78    0.78
  -6 -13   5    0.37    1.09
  22  -2   0    0.16    1.15
   1 -13   6   18.73    1.03
  -7 -11  11   22.00    1.34
  10 -10   8   36.86    1.62
  -3   0  19    2.40    2.15
 -19  -6  10   28.45    1.59
   9  -5  14   29.76    1.50
   3  -6  16  241.98    4.49
  -8 -12   8   25.46    1.37
  11 -12   0    8.32    1.06
   4 -11  10   16.67    1.34
   5  -2  17    3.68    1.46
   8  -9  11    1.62    0.69
  -6 -10  13   -0.03    1.15
 -22  -1   9    1.81    1.22
  11  -2  14    7.23    1.40
   6 -11   9    7.10    1.71
   8 -12   5   11.72    2.06
  -1 -10  13   30.50    1.56
  21  -4   1   12.21    1.46
 -20  -4  11  134.14    2.74
  -7 -13   4    7.67    1.09
 -17  -9   6   66.49    1.87
 -12  -7  15   25.15    1.46
 -11  -9  13   56.59    1.90
   1 -12   9   23.65    1.31
  14  -1  12    0.84    1.28
  17  -8   3   28.79    1.31
   6  -4  16    0.22    1.00
  17  -4   8   17.36    1.59
  -9  -8  15   10.59    1.34
 -14  -9  11   56.15    1.78
 -21  -5   1  155.14    3.99
  -7  -1  19  244.41    4.27
 -21  -4   9   50.73    1.90
 -17  -3  15    7.88    1.31
  16  -2  10   18.82    1.62
  18  -1   8   20.75    1.56
   4  -9  13   13.15    1.06
  -1  -4  18   12.74    1.34
 -21  -5   7    0.56    1.12
  -9  -7  16   25.83    1.46
  -6 -12   9    4.64    1.22
 -18  -7  10   81.29    2.24
 -22  -3   1    0.72    1.12
 -15  -9  10    2.90    1.18
   7 -12   6   23.53    2.15
  -3  -1  19   -0.34    1.25
   1  -8  15  172.00    3.43
  -8  -6  17  114.57    2.71
   9 -12   4   25.11    2.06
 -19   0  14  129.47    6.14
 -11 -11   9   31.66    1.43
  22   0   1   -0.19    2.03
   6 -13   3  707.84   13.74
 -14  -7  14   21.28    1.37
 -19  -7   8   66.84    1.96
   2  -2  18   38.61    1.84
   5 -13   4   59.08    2.56
 -14  -6  15  672.63    9.63
   4  -7  15  225.22    5.02
   1  -3  18    0.93    1.06
  19  -3   6   78.24    2.31
 -12 -11   8   22.28    1.34
 -15 -10   7   10.10    1.25
  10  -4  14  228.90    4.08
  12  -9   8    4.02    0.93
  15  -2  11   64.37    2.03
 -11  -5  17   83.01    2.18
  17  -7   5   79.24    2.24
  -8   0  19    0.53    1.84
  10 -11   6   29.82    2.06
  17  -2   9   24.96    1.53
  19  -6   3  246.91    4.55
  10  -7  12  269.37    4.95
  -9  -4  18    8.54    1.46
 -20  -6   8   73.94    2.03
  21  -2   3   13.55    1.50
   8  -6  14  239.30    4.46
  -1  -6  17   28.79    1.62
  13  -9   7  107.81    2.27
   4 -12   8    4.27    1.71
  10  -8  11    5.48    0.90
  18  -5   6   64.06    1.90
  -5 -13   6  987.68   13.49
   1  -9  14   34.37    1.65
  17  -9   0   88.65    2.09
   7  -3  16   41.78    1.65
 -21  -2  11   10.31    1.31
 -20  -3  12  190.07    3.49
   9 -11   7    0.19    1.74
   9  -3  15   26.52    1.65
   5  -5  16  253.07    4.52
 -12  -8  14    4.21    1.25
 -18   0  15   -1.06    1.46
 -20  -5  10    6.79    1.43
  13 -10   5    0.90    0.62
   8   0  16  943.69   18.91
 -15  -8  12    2.09    1.15
 -12  -6  16  428.81    6.23
  -8 -13   2    0.50    0.87
  -8 -13   1   47.42    1.74
 -19  -1  14    6.04    1.25
  -2   0  19   -1.40    1.68
 -16  -8  11  306.26    4.86
  19  -7   1  810.64   11.53
  22  -1   1   18.60    1.46
   6  -6  15  906.64   12.53
 -14 -11   3    5.08    1.12
 -15   0  17    1.71    1.93
  -5  -2  19  106.25    2.52
  20  -2   5    0.87    1.40
   9 -10   9   33.46    1.78
 -11  -3  18   23.59    1.50
 -10 -10  12  118.31    2.62
  -8  -1  19   88.31    2.27
 -14 -11   2    0.75    1.00
  11 -11   5  117.97    3.77
   2 -13   6    0.50    1.78
 -22  -4   4   14.36    1.50
 -13  -9  12   11.19    1.28
   2  -5  17  245.72    4.58
 -11 -12   5   33.68    1.40
  11  -9   9    0.72    0.69
 -12  -2  18   93.38    2.31
 -20   0  13   -2.31    2.06
   7 -13   2  139.72    4.27
  -6  -2  19   38.73    1.99
  -7 -10  13   11.93    1.37
  13  -4  12   52.94    1.81
 -13 -10  10   11.78    1.22
  16  -8   5    2.18    0.93
   4 -13   5   83.19    3.12
  18  -8   1   25.96    1.34
   0 -10  13  176.67    3.27
  -4  -2  19   18.51    1.37
 -22  -4   5    1.96    1.50
   3   0  18   91.48    3.33
  18  -6   5   -0.41    1.28
 -23   0   4   18.85    2.49
 -18  -1  15    2.84    1.46
   8  -1  16  132.02    3.05
  11 -12   1   41.54    1.37
  13   0  13    0.47    2.09
  -2  -1  19    6.17    1.34
 -23   0   5    0.19    1.87
 -16 -10   3    0.12    1.06
  -8 -13   3   12.87    1.15
 -22  -4   3   19.54    1.50
 -14 -11   4   11.93    1.15
   6 -12   7    0.97    1.96
 -15  -4  16    1.59    1.22
   8 -13   0  201.07    4.02
 -15  -1  17  154.64    3.21
  13 -11   2    9.35    0.78
 -22  -2   9  101.67    2.34
  10 -12   3   68.02    2.71
 -10 -11  10  317.70    5.17
   1  -7  16   21.56    1.37
   2 -11  11   11.09    1.43
  10   0  15   -2.37    2.09
  19   0   7   -2.06    1.84
 -14 -10   9    1.37    1.15
  14  -9   6   -0.03    0.87
  -9  -9  14  183.62    3.43
  14  -2  12    0.16    1.31
   2 -12   9   30.38    1.22
 -20  -1  13  150.97    3.05
  -8 -11  11    1.18    1.28
 -22  -3   8   20.81    1.56
 -18  -8   8   10.13    1.37
  -7  -2  19  163.65    3.05
 -16 -10   4   -0.47    1.09
 -14  -3  17  134.20    3.21
 -18  -5  13   39.42    1.56
 -13 -11   7   -0.41    1.15
  18  -4   7   35.49    1.62
 -14 -11   1    1.71    1.03
  18  -2   8    1.96    1.18
 -16 -10   2   31.66    1.37
 -16  -9   9  786.11   10.25
 -13  -4  17    9.25    1.34
   8 -11   8   17.89    2.27
   3  -1  18   52.29    1.99
 -17  -6  13  188.98    3.61
   6 -10  11   22.31    1.68
 -23   0   3   -0.06    2.03
  -7 -13   5   29.85    1.34
  -7 -12   9   52.91    1.71
 -23  -1   4    0.25    1.15
  -5  -5  18   94.51    2.49
   6   0  17   -1.71    1.68
  -9   0  19    0.59    1.78
 -17  -9   7   86.25    2.15
  -3  -2  19   53.47    1.99
  13  -1  13    2.96    1.40
  -9  -6  17   24.02    1.59
 -23  -1   5    0.75    1.25
   0  -4  18    2.43    1.31
  11  -5  13    9.50    1.31
 -12 -10  11   31.72    1.59
  16  -9   3    9.78    1.09
  -2 -13   7    1.99    1.00
 -14  -8  13   38.36    1.65
 -17  -5  14    2.71    1.22
  -4  -5  18    3.71    1.40
 -22  -4   6   45.37    2.43
  10  -6  13  458.57    7.98
 -13   0  18    2.31    2.06
 -23   0   6  213.97    5.80
  20  -6   1  272.05    5.08
 -14  -5  16    4.71    1.37
  10  -1  15    2.18    1.25
  19  -1   7   57.96    1.99
  -6  -5  18  318.07    5.95
  21  -5   0  260.65    4.77
 -10 -12   7    5.98    1.25
  -1 -13   7    7.42    0.90
 -17  -8  10    4.86    1.15
   7  -8  13   -1.06    0.97
 -18  -6  12    7.51    1.25
 -21  -5   8   12.18    1.34
  -3 -13   7   33.28    1.34
  15 -10   2    3.05    0.93
  -6 -13   6  352.44    5.52
 -10  -7  16    3.27    1.31
 -10  -8  15   19.19    1.37
 -20  -7   4  784.37   10.69
 -16  -3  16  135.42    2.77
   0  -6  17   -0.22    1.31
  12 -11   4   15.30    1.78
 -23  -1   3   62.44    1.93
  -1   0  19    0.90    1.84
   6  -1  17    0.97    1.28
  -9  -1  19   69.36    2.15
  -9 -12   8  311.40    5.02
  14  -7   9   33.12    1.53
  22  -3   0    1.28    1.34
 -22  -4   2    4.77    1.34
 -10  -4  18   -0.75    1.31
  15  -6   9   28.85    1.46
  10  -9  10   15.86    0.84
 -20  -7   3   83.85    2.03
   4 -10  12    7.17    0.75
 -19  -2  14  280.06    4.89
  22  -2   1    0.12    1.37
  20  -4   4   36.24    1.68
 -17   0  16   24.58    2.31
   4  -4  17  199.82    4.08
 -22   0  10    1.96    1.68
   5  -3  17   13.02    1.50
 -14 -11   5    8.76    1.22
 -16 -10   5  281.46    4.58
  -3  -5  18   62.07    2.06
  11  -3  14   79.95    2.37
  -8 -13   4   16.79    1.15
   2  -8  15  120.99    2.71
 -13  -1  18   39.76    1.81
 -23  -1   6  129.50    2.80
 -19  -5  12   51.01    1.81
 -16 -10   1   18.54    1.22
  14  -6  10    7.73    1.34
  -8  -2  19  250.39    4.77
 -16  -6  14   11.72    1.22
   8 -13   1    6.01    0.81
 -20  -7   5   92.42    2.21
  15  -7   8   45.06    1.78
   0 -14   0    9.04    1.59
   0 -13   7    0.09    0.72
  14 -10   4  201.69    3.43
 -19  -8   4    5.33    1.12
   3 -13   6  117.75    3.83
  -8 -10  13   82.54    2.12
  -7  -5  18   21.75    1.53
 -19  -8   3   61.48    1.93
  16  -3  10    2.52    1.40
   5 -11  10   32.59    1.56
 -18  -4  14   30.66    1.53
   1 -10  13  132.61    2.93
  21   0   4   53.87    2.68
   5  -8  14   22.90    1.31
  -3 -11  12   78.24    2.06
  -3 -12  10    3.02    1.06
  -4 -13   7   44.90    1.62
   7  -7  14    8.38    1.28
  13  -7  10    3.33    1.25
  -1  -1  19   25.86    1.53
 -23   0   2  132.77    4.08
   1 -14   0    0.97    1.00
   2  -9  14   53.31    1.71
  17  -9   1   28.48    1.40
 -18  -2  15  212.01    3.71
   8  -2  16   63.32    2.15
   8 -10  10  262.30    5.20
  -2 -12  10   25.80    1.34
  -4 -11  12   24.09    1.37
  14 -11   0   93.07    2.09
  -2  -2  19   75.44    2.24
   0 -14   1    0.22    1.00
  20  -5   3   13.65    1.31
   4  -6  16  206.52    3.99
   2  -3  18    5.95    1.37
  16  -6   8   22.56    1.50
 -17  -1  16    1.96    1.25
 -22  -1  10   76.56    2.09
 -21   0  12  660.32   14.27
 -19  -4  13    6.23    1.31
 -12 -12   2  153.15    3.24
 -11 -12   6    0.69    1.12
   6 -13   4  137.60    3.96
 -15  -2  17  317.39    4.99
  -1 -14   1    0.06    1.03
   7  -9  12    1.59    0.78
  15  -3  11    0.28    1.25
  21  -4   2    4.39    1.34
  -2 -11  12   14.80    1.09
 -15 -10   8    0.65    1.12
  17  -3   9   -0.06    1.34
 -12 -12   3    3.27    1.09
  -4 -12  10    2.80    1.09
 -20  -2  13   64.25    2.03
 -20  -7   2  121.40    2.68
  21  -3   3    0.69    1.25
 -19  -7   9   20.07    1.37
 -19  -8   5    0.69    1.18
 -12  -9  13   35.96    1.62
 -17  -7  12   92.85    2.15
   9  -8  12  227.43    4.08
  15  -9   5   85.13    1.93
 -12  -5  17  113.61    2.62
 -20  -6   9    9.69    1.37
 -21  -4  10    2.18    1.37
   1 -14   1   40.07    1.34
 -21  -6   4  405.69    6.29
  12  -4  13    3.55    1.40
 -23   0   7   -0.84    1.93
   7 -13   3  700.77   14.43
  21  -1   4   22.15    1.46
   5 -12   8    5.08    1.71
   3  -2  18    6.45    1.43
 -22  -4   7   31.84    1.74
 -16  -7  13    0.25    1.22
   5  -9  13    9.25    0.97
 -19  -8   2   51.57    1.81
 -21  -3  11  165.58    3.33
 -23  -1   2   64.22    2.06
 -13  -7  15   65.43    2.06
 -23  -2   4   27.42    1.56
  -1 -12  10   77.12    1.90
  11 -12   2    1.74    1.56
  -5 -11  12   -0.06    1.09
 -16  -5  15    0.65    1.34
  13  -2  13   47.08    1.87
 -12 -12   1   76.28    1.84
   2 -14   0    6.67    1.03
 -23  -2   5  147.97    2.99
  -2  -5  18  111.86    2.87
 -21  -1  12   10.97    1.65
   5 -13   5  391.02    8.79
  13  -6  11   27.51    1.68
  18  -7   4   89.21    2.24
   7 -11   9   39.17    2.43
  19  -5   5    1.06    1.25
  -2 -14   1    1.46    0.97
 -21  -6   3   23.06    1.68
  -5  -3  19   43.56    2.03
 -21  -6   5    4.36    1.12
  20  -3   5   18.88    1.53
   3 -12   9   58.67    2.99
   9  -7  13  142.49    3.27
 -10   0  19   -0.75    1.78
  10  -2  15    7.63    1.40
  19  -2   7   61.17    2.06
  22   0   2  130.15    3.96
   1 -13   7    0.84    1.62
 -20  -7   6   35.27    1.53
  -4  -8  16    8.88    1.28
 -12  -3  18   50.23    1.84
  16  -7   7    5.86    1.34
  -5  -8  16    3.49    1.37
  -6  -3  19  350.42    5.89
   3 -11  11    4.46    1.50
 -17  -4  15   45.52    1.74
  15  -5  10   96.94    2.27
 -19  -6  11  119.65    2.77
  -8  -5  18   -0.78    1.25
  14  -8   8   87.34    2.15
  13  -8   9   27.23    1.40
 -23  -1   7   10.81    1.40
  -1 -14   2    7.88    1.03
  19  -7   2  488.45    7.70
   0 -14   2   -1.00    0.93
  -9 -11  11   79.77    2.21
  -4  -3  19  249.49    4.49
  -1 -11  12    2.99    1.06
  -8 -12   9  102.26    2.37
 -12 -12   4  133.98    2.62
   5  -7  15    2.52    1.18
 -10  -6  17    5.86    1.40
   2  -7  16    8.48    1.25
  -5 -12  10   14.86    1.25
 -10  -9  14   38.01    1.68
  16  -5   9   -1.15    1.34
  -5 -13   7   54.03    1.78
 -23  -2   3   40.76    1.74
  17  -8   4   70.54    1.90
   3  -5  17  305.86    5.95
   9 -12   5    1.78    1.71
 -22  -4   1   -1.09    1.22
 -11 -10  12   77.80    2.15
 -16 -10   6  132.08    2.71
   6  -2  17   16.08    1.46
  -9  -2  19  102.67    2.49
   2 -14   1   41.57    1.28
   8 -12   6   21.90    2.03
  -3  -8  16    3.71    1.18
  18  -8   2   11.87    1.28
  12   0  14  281.96    6.79
 -12 -11   9   45.59    1.56
  16 -10   0   59.14    1.71
  -4  -9  15  164.80    3.33
  -9 -13   2    6.70    0.90
   1  -4  18    2.93    1.28
   8  -5  15   26.24    1.43
  19  -4   6    4.89    1.50
  12  -7  11   79.39    2.12
 -22  -3   9   -0.44    1.25
 -13  -6  16  530.20    7.60
 -10  -1  19   27.98    1.59
 -13  -2  18    5.64    1.43
 -14 -11   6    0.47    1.12
 -23  -2   6   30.16    1.62
  22  -1   2    3.46    1.37
  -9 -13   1   79.36    2.09
  -6  -8  16  156.86    3.18
  -2 -14   2    4.52    1.00
  14  -3  12   63.03    2.18
   0   0  19    0.69    1.87
  -7 -13   6   21.72    1.34
  -5  -9  15  226.00    4.05
  20   0   6   -0.78    2.09
   1 -14   2   35.09    1.22
  -7  -3  19  566.47    9.60
  -3  -9  15  123.11    2.74
  -8 -13   5   17.45    1.25
 -19  -8   6   12.12    1.37
   0 -12  10  207.86    4.05
 -13  -8  14    1.03    1.25
  18  -3   8    1.65    1.28
 -18  -7  11   18.85    1.43
  17  -6   7   47.70    1.93
  -6 -11  12   33.65    1.56
   1  -6  17   15.39    1.40
   8 -13   2  127.78    3.99
  13 -11   3    9.44    0.87
 -17  -9   8   14.46    1.34
 -21  -6   2  244.51    4.08
  14  -5  11    6.23    1.34
   7  -4  16   -0.78    1.34
 -20  -4  12   18.42    1.40
  -1  -2  19   33.65    1.62
   9  -4  15   56.90    1.96
  -3 -14   1   21.09    1.18
 -21  -6   6  106.28    2.52
 -20  -7   1  699.30    9.69
   3 -14   0    6.42    0.93
  12 -12   0   69.86    1.90
 -18  -9   3  114.01    2.52
  -3  -3  19   89.30    2.40
 -23   0   1    2.90    1.81
  -9 -13   3   57.52    1.59
   9  -9  11   19.04    0.97
  12  -1  14    5.95    1.37
  15  -8   7   74.07    1.90
 -18  -9   4    5.58    1.25
 -17  -2  16    0.75    1.37
 -22  -2  10    1.68    1.28
 -18  -8   9   48.58    1.62
  12  -8  10    2.49    1.09
 -19  -8   1  201.07    3.65
 -13 -11   8    2.93    1.25
  10 -12   4   64.06    3.27
 -15  -6  15  371.48    5.83
   4   0  18  102.26    3.55
  19  -6   4  129.06    2.93
 -11 -11  10   35.77    1.56
  21  -5   1  524.47    8.60
 -11  -4  18    2.65    1.37
 -20  -5  11   -0.34    1.28
 -15  -7  14    2.15    1.15
 -15  -9  11   34.43    1.56
  -9 -10  13   -0.72    1.09
  -2  -8  16    1.12    1.28
   0  -1  19    5.30    1.50
 -11  -7  16    0.90    1.18
  20  -1   6    3.74    1.31
  14 -11   1    0.28    0.87
   6  -5  16  166.83    3.55
  17  -5   8   29.79    1.56
  12 -10   7  131.15    3.15
   4 -13   6  310.69    7.88
 -21  -5   9    7.38    1.28
  -6  -9  15  110.93    2.52
   2 -10  13   16.76    1.09
   7 -12   7    4.52    2.12
  -5  -7  17  404.17    6.45
 -11  -8  15   32.34    1.68
  -1  -5  18    3.18    1.25
   9 -13   0  546.62    8.97
  -4  -7  17  164.15    3.43
  21  -2   4   -0.81    1.31
  11 -10   8    1.18    1.25
  -2  -9  15  161.93    3.65
   0 -11  12   23.74    1.22
 -23  -2   2    1.25    1.22
  -3 -14   2    0.09    1.03
  -6 -12  10  170.57    3.40
   2 -13   7   20.19    1.90
 -18  -9   2   -0.53    1.22
 -23  -1   1    0.93    1.31
 -19  -3  14  103.92    2.37
  -7  -8  16    2.06    1.25
   2 -14   2   49.67    1.18
  22  -3   1   10.03    1.37
 -21  -2  12  382.45    5.80
 -23   0   8   -0.87    1.68
  20  -6   2  113.01    2.93
   3 -14   1   44.21    1.12
  -1 -14   3   44.21    1.46
 -12 -12   5   41.35    1.56
   4  -1  18  102.48    2.65
  10  -5  14    0.25    1.34
 -14  -9  12    2.84    1.34
   7  -6  15  716.10   10.87
 -18  -9   5    0.81    1.25
  -6  -7  17  343.53    5.58
   3  -8  15    2.62    1.15
  -8  -3  19  340.04    5.95
 -20  -7   7    4.14    1.15
  12  -6  12   20.32    1.46
  -9  -5  18   46.52    1.87
   0 -14   3   -1.22    1.00
 -22  -4   8   -0.22    1.40
  15 -10   3  114.95    2.40
 -14  -4  17   84.44    2.15
  -3  -7  17   70.08    2.09
 -10 -12   8   46.46    1.68
 -16   0  17   -1.31    1.71
  -6 -13   7  118.47    2.68
  10 -11   7    0.25    1.90
 -23  -2   7   69.64    2.21
  13 -10   6   31.88    1.15
  11 -11   6   33.18    2.09
   3  -9  14   10.81    1.12
  -2 -14   3   57.64    1.62
 -16  -9  10    2.40    1.43
 -14 -10  10   31.35    1.40
 -18  -3  15   15.70    1.37
 -14   0  18  161.40    4.74
   8  -3  16   46.68    1.90
  17  -7   6  240.30    4.64
  -9 -13   4  249.55    4.18
   5 -10  12    2.24    0.62
   9  -6  14   62.01    1.93
 -11 -12   7    3.02    1.15
  -2  -3  19   22.06    1.59
   1 -12  10   87.49    2.71
  17  -9   2  151.22    2.99
   7 -10  11    4.39    1.40
 -23  -1   8  263.98    4.55
  -7 -11  12   90.49    2.40
 -15  -3  17  129.56    2.90
  16  -9   4    0.47    0.97
 -10  -2  19    3.96    1.34
  22  -2   2   23.34    1.56
  -4 -14   1  104.76    2.18
 -16  -8  12    6.76    1.31
 -22  -5   4  320.16    5.27
 -11   0  19   -1.53    2.09
  17   0  10   57.05    2.74
 -13 -10  11   14.93    1.43
 -20  -3  13  464.49    6.86
  10 -10   9   81.54    2.49
  -7  -9  15  300.37    5.20
   1 -14   3   21.94    1.03
  13  -5  12    5.61    1.37
  16   0  11   -1.28    1.56
 -21  -6   1    7.70    1.25
 -16  -1  17  243.54    4.27
  -1  -8  16    4.46    1.22
   4 -14   0    1.84    0.78
 -21  -6   7   91.83    2.24
 -16 -10   7    7.26    1.25
  -1  -9  15  223.54    4.08
 -16  -4  16   24.40    1.50
 -22  -5   5  407.06    6.54
   3  -3  18   -1.43    1.15
  -7  -7  17  280.71    4.74
 -19  -8   7    1.81    1.25
   4 -12   9    1.25    1.87
   9   0  16 1155.29   23.37
 -23  -3   4  140.87    3.05
 -14  -1  18   46.43    2.09
  22  -4   0   22.62    1.37
  11 -12   3    4.42    2.24
  -2 -13   8   18.29    1.12
  -4 -10  14    8.26    1.15
  16  -8   6   71.67    1.90
   6 -11  10   14.36    1.18
   9 -11   8  380.64    8.82
  16 -10   1    1.46    1.03
  13  -3  13  141.90    3.12
  11  -7  12  113.45    2.84
  12 -12   1   22.87    1.18
   7 -13   4  148.72    4.36
 -23  -3   5  513.13    8.23
  -3 -14   3   40.23    1.46
  11  -8  11   27.70    1.22
  12  -2  14    2.99    1.28
 -22   0  11   -3.43    2.03
 -18  -9   1   14.99    1.25
 -22  -5   3  131.21    3.15
   9 -13   1   -0.03    0.75
   5  -4  17    2.21    1.31
 -15  -5  16    9.91    1.37
  -4 -14   2   17.08    1.15
  -2  -7  17   19.32    1.37
  -3 -10  14  122.67    2.77
  -3 -13   8   11.81    1.15
  11  -4  14   19.29    1.50
  12 -11   5   44.15    2.59
  10  -3  15    6.08    1.28
  19  -3   7   69.14    2.09
 -11  -6  17   74.88    2.18
   6 -13   5  554.04   11.90
 -11  -1  19   24.99    1.46
  17  -1  10   42.25    1.78
   3 -14   2   47.67    1.62
  -9 -12   9    0.03    1.22
   0  -2  19   11.62    1.43
 -17  -8  11  213.38    3.74
  20  -2   6    0.19    1.46
   7   0  17    2.15    1.93
  -1 -13   8   21.09    1.06
  -8  -8  16    2.93    1.31
  -5 -10  14    0.87    1.22
   4 -11  11    2.24    1.40
  16  -1  11   -0.16    1.31
 -14 -11   7    7.88    1.18
  19  -8   0    6.23    1.34
  13  -9   8   29.94    1.25
  20  -7   0    7.20    1.28
 -15  -8  13   25.08    1.53
 -18  -9   6    1.87    1.28
  18  -5   7    0.03    1.15
  16  -4  10   12.03    1.43
 -15 -10   9   24.83    1.43
   6 -12   8    9.75    1.81
  18  -6   6   54.96    1.93
 -13  -5  17   93.42    2.34
 -10 -11  11    7.20    1.31
 -15 -11   3  118.50    2.59
   1 -11  12  118.19    2.56
  18   0   9   -0.16    1.90
   1   0  19   -0.41    2.21
 -23  -3   3   10.31    1.40
   9  -1  16  147.32    3.24
  -7 -12  10  763.12   10.91
   5  -6  16  169.01    3.52
   6  -8  14    2.03    1.03
   6  -3  17    5.64    1.43
 -20  -6  10    0.00    1.15
  -9  -3  19  159.78    3.27
 -11  -9  14    4.80    1.31
  -8 -13   6    5.86    1.25
   8  -8  13   28.60    1.40
 -19  -7  10   93.85    2.24
 -23  -2   1   32.06    1.74
   0  -5  18  108.99    2.65
   4 -14   1   11.03    1.06
 -19   0  15   -0.19    1.53
   3  -7  16  110.02    2.84
 -22  -1  11   -0.44    1.34
   2  -4  18   52.94    1.90
  15   0  12   21.41    2.03
 -15 -11   2    1.03    1.00
   8 -13   3  544.35   11.47
 -20   0  14  210.32    5.76
  12  -9   9    8.60    0.87
  -2 -10  14  232.29    4.24
 -22  -5   6   17.20    1.40
   4  -2  18    6.92    1.50
  -4 -13   8    8.16    1.22
   2 -14   3   53.87    1.71
  23   0   0    0.06    1.78
  15  -4  11   21.44    1.53
 -13  -3  18    0.16    1.50
 -23  -3   6   17.17    1.37
   3 -13   7   40.41    2.56
  14 -10   5    0.41    0.81
   2  -6  17  170.66    3.49
  17  -4   9   20.53    1.53
 -13  -9  13    0.97    1.22
  14  -9   7   10.13    1.00
 -15 -11   4    0.65    1.25
   7  -1  17   -0.56    1.22
  21  -4   3   34.96    1.65
  18  -1   9    6.01    1.40
   0 -13   8  219.95    3.55
 -12 -12   6  100.58    2.31
   6  -9  13   29.16    1.22
   1  -1  19   12.71    1.53
 -21  -4  11   26.42    1.59
  -6 -10  14   44.71    1.81
  -1  -3  19    3.30    1.53
  -1 -14   4   12.15    1.06
 -22  -5   2   43.31    2.12
 -10  -5  18   18.79    1.46
 -10 -10  13   30.07    1.50
  -8  -7  17   59.02    1.87
  14 -11   2  229.99    3.83
 -19  -1  15    4.46    1.46
  -9 -13   5    8.76    1.18
  -8  -9  15    3.43    1.28
  20  -5   4   14.40    1.46
  15  -1  12    6.14    1.46
 -17  -3  16    9.97    1.46
   4  -5  17  118.19    2.87
  -4 -14   3   29.82    1.37
 -22  -3  10    3.12    1.37
 -23  -2   8    0.69    1.22
 -20  -1  14  150.00    2.96
  -7 -13   7   65.71    1.84
 -14  -7  15   43.47    1.81
  -2 -14   4   44.59    1.46
   5 -13   6  376.53    9.16
  -5  -4  19   33.78    1.56
  20  -4   5   -0.28    1.40
   3 -10  13   29.79    1.22
 -12 -10  12   44.25    1.84
  23  -1   0  376.59    6.17
   0 -14   4   44.03    1.34
   2 -12  10    0.69    1.15
  19  -7   3    3.08    1.18
 -12  -4  18   13.99    1.71
 -20  -7   8    6.08    1.25
  -8 -11  12  518.39    7.98
   0  -9  15  118.00    2.56
  -6  -4  19    0.62    1.40
 -17  -9   9  545.38    7.73
  18  -8   3   14.68    1.25
   8  -7  14  282.40    4.92
  11   0  15    1.03    1.81
   8  -9  12    0.41    0.81
   0  -8  16   30.94    1.62
 -18  -6  13  119.74    2.68
 -16  -2  17   21.84    1.71
 -15 -11   1    9.69    1.15
  -1  -7  17    9.25    1.31
   9 -10  10  643.56   10.81
  -5 -14   1   75.65    1.71
  22   0   3    2.77    1.99
 -23   0   9   -1.50    1.65
 -18  -5  14   -0.78    1.22
  21  -3   4    5.39    1.31
  -4  -4  19   65.90    2.21
   8 -11   9   34.90    2.62
 -23  -3   2   14.74    1.46
  -5  -6  18   58.45    1.96
 -14  -2  18  196.93    3.68
 -12  -7  16    2.74    1.40
  -1 -10  14   83.76    2.18
  -5 -13   8   36.11    1.53
 -10 -13   2  109.06    2.18
  21   0   5   -0.12    2.18
  11  -6  13   25.02    1.62
 -21  -3  12  183.84    3.61
 -19  -5  13   71.82    2.12
   5 -14   0    3.55    1.03
 -17 -10   3    3.86    1.25
   6  -7  15   26.27    1.62
 -17  -6  14    1.12    1.50
  -4  -6  18    9.29    1.71
  11  -9  10   15.98    0.90
 -22  -4   9   11.81    1.28
  -5 -14   2   55.62    1.62
 -18   0  16   68.86    3.05
  13 -11   4   64.47    2.93
  -3 -14   4  192.72    3.43
 -15 -11   5    1.50    1.12
  18  -9   0   75.03    2.06
 -14  -6  16  625.64    8.60
  21  -5   2   10.19    1.34
  -6  -6  18  243.20    4.27
 -13 -12   2   53.25    1.62
  21  -6   0  462.06    7.79
 -12  -8  15  163.09    3.21
 -11  -2  19   41.66    1.93
 -13 -12   3   22.19    1.34
  17  -2  10   12.93    1.65
  14  -4  12    2.31    1.50
 -17 -10   4    1.06    1.25
 -10 -13   1    9.29    1.18
 -21   0  13    1.28    2.15
  16  -2  11  287.19    5.39
   1 -14   4  127.53    2.84
   4 -14   2    3.55    1.00
  11  -1  15   -0.47    1.28
  -7  -4  19   93.54    2.56
  19   0   8    4.49    1.74
 -21  -6   8   95.88    2.43
  18  -4   8   77.18    2.18
 -21  -5  10   22.90    1.53
   9 -13   2  112.33    4.08
  12  -5  13   -0.72    1.22
 -23  -3   7   56.27    1.96
  22  -1   3    1.43    1.50
 -23  -1   9    0.87    1.34
  -9  -8  16    0.53    1.34
 -10 -13   3  200.63    3.49
 -22  -5   7   53.81    1.93
  15  -9   6   -0.19    1.00
   3 -14   3   80.58    2.06
 -13 -11   9   -0.50    1.18
   9 -12   6    7.10    2.21
   1 -13   8  438.85    9.78
   9  -2  16   95.41    2.62
 -18  -8  10    8.79    1.37
  18  -7   5  184.40    3.55
  -7 -10  14   18.26    1.40
 -17 -10   2    2.59    1.18
  -3  -4  19  168.54    3.83
 -18  -9   7  274.67    4.52
 -12 -11  10   21.13    1.56
  21  -1   5    2.96    1.53
 -14  -8  14   13.37    1.28
 -19  -8   8    3.61    1.22
 -22  -2  11    1.18    1.53
  14   0  13    0.34    2.12
   4  -8  15   57.77    1.93
  12 -12   2   80.92    1.93
  10 -12   5   14.68    2.03
  -3  -6  18   13.71    1.40
 -18  -1  16  241.17    5.42
 -10  -3  19   37.58    1.56
 -12   0  19   -2.77    2.15
 -19  -6  12  182.53    3.37
  22  -3   2   40.07    1.81
  17  -8   5   39.20    1.50
   4  -9  14    1.09    0.97
   2 -11  12   71.70    1.74
  10  -8  12   93.42    2.24
 -13 -12   1    8.66    1.06
   5   0  18   17.64    2.18
   7  -2  17   32.00    1.74
 -21  -1  13  175.46    3.77
  -8 -12  10 2231.18   29.26
  19  -1   8   -0.78    1.25
 -13 -12   4   50.29    1.62
 -17  -5  15    1.25    1.37
  -7  -6  18   39.32    1.74
 -16 -10   8    1.22    1.28
   5 -14   1  143.02    2.90
  -3 -12  11   61.57    1.87
  18  -2   9   45.59    1.81
   1  -2  19  108.03    2.80
 -17  -7  13    1.71    1.25
   8 -12   7    6.42    1.99
 -17 -10   5  200.17    3.49
 -22  -5   1   58.17    2.09
  -5 -14   3   22.28    1.28
  16 -10   2    7.20    1.09
 -11 -12   8    0.56    1.15
  -9  -7  17    6.61    1.34
  10 -13   0  230.80    4.49
 -19  -4  14   40.88    1.78
  12  -3  14   34.46    1.71
 -19  -2  15  141.18    2.84
  20  -6   3   43.44    1.62
  19  -8   1   53.22    1.81
  22  -4   1    2.77    1.28
  15  -2  12   16.67    1.43
  14  -1  13  274.20    4.99
  -2 -12  11    6.45    1.06
 -20  -2  14  301.15    5.20
  -4 -14   4   62.22    1.81
  -4 -12  11    7.95    1.18
   5 -12   9   26.98    2.12
  15 -11   0   34.40    1.62
   1  -5  18  335.80    5.89
  19  -5   6   40.23    1.84
  23  -2   0  168.29    3.33
  10  -7  13   46.18    1.74
 -12  -1  19   40.16    1.71
  20  -7   1  694.13   10.19
  -8  -4  19  146.79    3.18
  17  -9   3   22.09    1.31
   0  -3  19   94.63    2.43
   5  -1  18  426.76    6.73
  20  -3   6   29.32    1.78
 -10 -13   4   12.18    1.22
   0 -10  14    3.49    1.09
  -9  -9  15    5.52    1.40
   4 -13   7   20.25    2.34
  15 -10   4  374.72    5.67
   2 -14   4   77.03    2.12
 -18  -7  12  152.71    2.96
  -6 -13   8   66.34    1.78
 -12  -6  17  357.30    5.73
   6 -10  12  118.59    3.46
   0  -7  17   60.60    2.06
 -17 -10   1   26.80    1.46
   7  -5  16  233.35    4.39
 -20  -5  12   13.34    1.53
 -10 -12   9   20.19    1.50
   9  -5  15   23.43    1.53
 -14 -11   8   -0.56    1.12
   2   0  19   -0.78    1.96
 -18  -4  15   98.99    2.59
   8  -4  16   17.17    1.50
  15  -7   9   12.65    1.40
 -16  -6  15  293.96    4.77
   1  -9  15    3.05    1.22
 -23  -3   1   21.78    1.56
  -2  -4  19   35.58    1.96
  -2  -6  18   30.82    1.87
  11 -12   4    1.74    1.74
  19  -6   5   31.66    1.65
 -15  -4  17  429.47    6.61
 -15 -11   6    0.90    1.18
   4  -3  18   30.63    1.62
  -9 -13   6  277.41    4.58
  -1 -12  11   20.69    1.18
   5 -11  11   12.84    1.56
   1  -8  16    0.50    1.12
 -11  -5  18   13.87    1.50
  -5 -12  11   11.06    1.22
  14  -7  10   82.26    2.43
   3 -12  10   58.61    1.78
 -15   0  18  542.26   12.87
 -16  -7  14   30.50    1.71
 -20  -4  13  151.15    3.05
 -12 -12   7    1.68    1.18
   7 -13   5  352.69    7.91
  -8 -13   7    4.27    1.28
  -9 -11  12 1379.07   17.79
 -11 -11  11  142.46    2.99
  11  -2  15   62.57    2.12
  15  -6  10    6.29    1.28
  13 -12   0   30.47    1.12
  -1 -14   5   16.20    1.09
  23   0   1    0.09    2.12
  -8  -6  18    0.34    1.31
   2 -13   8  453.74   10.22
   8 -13   4   48.83    2.71
  10  -9  11   18.48    1.03
  -6 -14   1    1.31    0.78
  22  -2   3   35.12    1.71
  -5   0  20   26.33    2.59
 -23  -2   9   12.40    1.43
  -2 -14   5  311.72    5.02
  -6   0  20   69.27    3.12
  -8 -10  14   31.19    1.62
   3  -4  18  127.72    2.84
 -13 -12   5  352.85    5.45
  16  -6   9   96.22    2.77
   3  -6  17  590.75    9.00
 -23  -4   4  157.26    3.18
 -12  -9  14   17.57    1.59
   2  -1  19   26.70    1.74
  -4 -11  13    7.79    1.15
 -15  -9  12   -0.84    1.43
  -3 -11  13   14.61    1.25
  13  -4  13   30.94    1.68
 -23  -4   5   53.16    2.34
 -16  -9  11  161.22    3.05
  -6 -14   2  150.90    2.71
  21  -2   5  369.05    6.54
   7 -11  10   20.66    1.59
   4  -7  16  722.33   11.40
  16  -7   8   17.17    1.34
   4 -14   3  127.07    2.65
 -23  -3   8    5.30    1.50
   8  -6  15  137.66    2.90
   8 -10  11   26.58    1.84
 -18  -2  16    8.97    1.50
   0 -14   5   12.99    0.93
  10  -4  15   -0.12    1.50
  19  -4   7    1.40    1.22
   7 -12   8   17.45    2.06
 -15  -1  18  359.55    5.61
   6 -14   0    4.67    1.09
 -17 -10   6  186.55    3.40
 -11 -10  13   42.75    1.78
  -4   0  20  245.04    6.48
   5 -14   2   14.49    0.97
 -22  -5   8   85.16    2.27
 -21  -2  13   65.68    2.09
 -14 -10  11    3.15    1.18
  19  -2   8   47.02    1.87
 -14  -5  17   75.25    2.21
  -7   0  20  571.33   12.49
 -16  -3  17  117.53    2.65
  16  -9   5    0.84    1.03
  -3 -14   5 1349.88   18.13
  18  -9   1   14.30    1.28
  23  -1   1    4.99    1.62
 -20  -7   9    3.93    1.31
   4 -10  13   34.87    1.37
 -21  -7   4  449.56    7.10
  10 -13   1   40.16    1.37
  -5  -1  20    0.65    1.37
  -5 -11  13   -0.75    1.15
 -10  -8  16    0.65    1.37
 -20  -8   4   26.73    1.59
   6 -13   6  150.93    4.18
  14 -11   3    6.51    0.84
  -6  -1  20  102.36    2.74
  -2 -11  13    1.40    1.12
 -17   0  17    0.41    2.37
  -5 -14   4    1.53    1.09
  20   0   7    1.43    1.90
  14  -6  11  143.30    3.18
 -23  -4   3   52.25    1.99
   6  -4  17    0.56    1.22
  -9  -4  19   97.00    2.43
 -14  -3  18    3.65    1.78
  14  -8   9   96.53    2.31
 -15 -10  10    0.19    1.28
 -20  -8   3  178.98    3.43
 -24   0   5    1.71    1.93
  14  -2  13  193.62    3.93
  13  -7  11   91.55    2.27
 -24   0   4  336.27    7.91
   0 -12  11   46.24    1.43
 -22   0  12  118.59    3.93
 -21  -7   3  765.99   11.06
  11 -11   7    5.70    1.74
 -21  -7   5  141.84    2.80
  -6 -12  11   27.11    1.46
  12 -10   8    0.00    1.37
   3 -14   4    8.04    1.90
 -13  -4  18    4.71    1.43
   9 -13   3  288.32    7.04
 -23  -4   6  251.05    5.02
 -12  -2  19   56.93    2.09
  21  -6   1  190.85    4.02
 -20  -6  11  163.74    3.15
 -10 -13   5    3.37    1.15
 -23   0  10   28.70    2.71
  -4  -1  20   15.27    1.59
 -11  -3  19    0.44    1.25
  17  -3  10    2.84    1.22
   5  -2  18    4.33    1.40
   6  -6  16   -0.16    1.28
 -20  -8   5   13.74    1.28
  17  -6   8    1.28    1.37
  15  -8   8  152.52    3.02
 -18  -9   8    0.65    1.25
  16  -3  11  322.34    5.67
 -21  -6   9   43.40    1.74
  -6 -14   3   24.68    1.28
  -7  -1  20    7.70    1.40
  13 -10   7   13.46    1.50
  13   0  14   37.64    2.65
 -19  -7  11   90.08    2.43
  -1  -6  18   20.00    1.53
   1 -14   5   26.27    1.18
 -16  -5  16    0.56    1.31
 -17  -1  17  113.54    2.74
 -10  -7  17   28.32    1.50
  20  -1   7  151.96    3.40
   1 -10  14    8.38    1.12
  17 -10   0  139.59    2.87
   3 -11  12    0.87    1.53
   9  -3  16    0.25    1.25
  12 -11   6    2.49    2.12
   7  -8  14    5.58    1.09
  13  -8  10    3.99    1.12
  -1  -4  19    7.88    1.40
  15 -11   1   21.31    1.22
  -3   0  20   46.08    2.77
  -2 -13   9  119.99    2.68
  22  -5   0    5.33    1.37
  -7 -13   8   68.92    2.03
  -3 -13   9   79.52    2.18
  10 -11   8 1068.01   20.41
  -9 -12  10 2628.15   32.94
 -22  -3  11  197.02    3.77
 -24  -1   5    2.93    1.46
 -17  -4  16    2.21    1.28
 -22  -4  10    8.57    1.46
   5  -5  17   48.17    1.81
 -14  -9  13    1.00    1.28
 -24  -1   4    8.35    1.46
 -24   0   6   54.72    2.65
   6 -14   1  307.79    5.61
  -8   0  20  921.06   18.23
 -22  -1  12    5.92    1.53
  -6 -11  13    0.50    1.31
 -13  -7  16    9.29    1.28
  10  -6  14   27.33    1.56
  -4 -14   5 1682.72   23.81
  11  -5  14   49.29    1.96
  -1 -11  13   33.68    1.71
 -24   0   3   -1.99    1.96
 -23  -1  10   43.09    1.87
 -13 -10  12   36.49    1.65
  11 -10   9   36.52    1.87
  -9  -6  18    0.69    1.40
 -20  -8   2   45.24    1.74
 -17  -9  10    1.74    1.18
  12 -12   3   71.95    3.21
   7  -3  17    4.14    1.31
 -19  -8   9   61.94    1.87
   7  -9  13  152.24    2.99
 -17  -8  12  198.39    3.55
  13  -1  14    7.10    1.50
  16  -5  10   72.23    2.21
  -1 -13   9  101.70    2.24
  17  -7   7   24.09    1.65
   1  -7  17   83.19    2.52
 -10  -9  15  255.35    4.42
  21  -4   4    2.80    1.28
  18  -3   9   15.24    1.50
  -4 -13   9   11.12    1.18
   1  -3  19   68.99    2.18
   8   0  17    1.09    2.27
 -21  -7   2   13.62    1.34
 -16  -8  13    5.20    1.15
  13 -12   1   28.48    1.43
  -3  -1  20   43.16    1.74
 -23  -4   2   61.73    1.93
 -13  -8  15  355.37    5.52
   2  -2  19  137.47    3.15
 -21  -7   6   19.75    1.46
 -13   0  19    0.41    1.96
 -19  -3  15   26.64    1.59
   2  -5  18  271.89    5.30
  15  -3  12  236.47    4.30
 -21  -4  12   22.43    1.62
 -20  -3  14    6.57    1.37
  18  -8   4   18.32    1.34
 -13 -12   6  184.31    3.43
 -24  -1   6  146.88    3.21
  -8  -1  20   74.22    2.21
 -15  -7  15    8.69    1.40
  19  -7   4   62.72    2.31
   3 -13   8  361.35    8.63
 -15 -11   7   11.06    1.31
   9  -8  13   60.79    1.84
  23  -3   0  229.39    4.14
   2  -9  15   22.65    1.43
  15  -5  11    8.85    1.43
 -24  -1   3   54.87    1.96
 -15  -2  18  267.47    4.55
 -20  -8   6   17.67    1.37
  14 -10   6  138.97    2.62
 -22  -6   4   52.75    1.81
  17  -5   9   19.47    1.68
  -9 -10  14    2.49    1.34
   5 -13   7   12.31    2.03
  21  -5   3   19.57    1.46
  10   0  16  233.16    6.08
  16  -8   7  138.63    3.02
 -19  -9   4   28.73    1.50
  13  -6  12   70.82    2.21
 -19  -9   3   24.43    1.46
  23  -2   1  136.51    3.30
 -23  -4   7   94.13    3.40
  -5  -2  20    7.26    1.53
 -16 -10   9   23.99    1.46
  19  -8   2    8.94    1.28
 -11 -13   2  268.09    4.61
  -6  -2  20    2.52    1.46
   5  -9  14    0.50    1.03
 -22  -6   5   -0.56    1.43
   5  -8  15  187.20    3.77
   2  -8  16   51.26    1.78
   8  -1  17    5.48    1.53
 -21  -5  11  150.50    2.96
   1 -12  11    0.81    1.37
   2 -14   5    5.70    1.81
  13 -11   5    0.75    2.06
 -13  -1  19    0.84    1.28
  -7 -12  11   79.80    2.21
 -17 -10   7   31.81    1.56
  16 -10   3  334.18    5.52
  -2   0  20  116.91    4.24
   4 -12  10  176.52    4.99
 -22  -6   3  212.51    4.27
  22   0   4   68.30    2.87
   0 -13   9  124.11    2.49
  20  -7   2   77.21    2.27
 -15  -6  16  571.68    8.16
  -6 -14   4   14.71    1.18
 -11 -13   3  396.22    5.83
  12  -8  11    8.97    1.40
   5 -14   3  292.83    6.82
  -5  -5  19  118.72    3.12
  20  -5   5    0.19    1.40
   9 -11   9    5.61    2.09
   6 -12   9   19.85    2.46
   7  -7  15  163.52    3.55
 -10  -4  19   30.82    1.96
 -24   0   7   -1.06    2.12
 -10 -11  12 1636.57   21.72
  22  -4   2   59.48    2.12
 -11 -13   1  130.96    2.84
  -5 -13   9   29.01    1.46
  12  -7  12   31.56    1.59
  -4  -2  20   46.68    2.03
  10 -13   2   12.71    2.03
 -12  -5  18   52.19    1.87
  -7 -14   1    4.36    1.15
  10  -1  16  102.30    2.65
  -6  -5  19   66.21    2.21
 -19  -9   5    1.03    1.25
  -7 -11  13    6.11    1.34
  11  -3  15    7.10    1.59
  -9   0  20  738.00   15.67
  -9 -13   7   -0.25    1.25
 -24   0   2  564.07   12.62
 -13 -11  10   16.76    1.53
  -7  -2  20  197.33    3.77
   9  -9  12    4.42    0.90
  18  -6   7   26.55    1.53
   0 -11  13   66.28    1.87
 -18  -8  11  818.08   11.22
  -7 -14   2  103.82    2.24
  22  -3   3   61.88    2.15
  -5 -14   5  977.77   13.74
 -23  -3   9   34.59    1.96
 -13  -6  17  513.91    7.85
  -4  -5  19   10.84    1.62
 -17  -2  17    5.08    1.53
   3   0  19    0.50    1.93
  20  -2   7  296.76    5.42
   4 -14   4    5.80    1.74
 -19  -9   2    0.16    1.37
 -20  -8   1  145.14    2.99
  10 -10  10  778.67   14.80
   9  -7  14  414.67    6.61
   0  -6  18    0.78    1.28
  12  -4  14   29.13    1.68
 -16 -11   3   65.53    1.84
  21  -3   5  115.16    2.74
   6 -14   2  140.06    2.87
 -11 -12   9    1.81    1.25
 -24  -2   5   41.41    1.84
  -2  -1  20    2.27    1.31
  22  -1   4   21.28    1.71
 -24  -2   4   46.43    1.90
 -22  -2  12   94.07    2.43
 -12 -12   8    1.84    1.25
 -22  -6   6  270.18    4.52
 -22  -5   9   -0.09    1.28
 -18  -3  16  124.76    2.68
 -24  -1   7   34.59    1.62
 -14 -11   9   27.01    1.62
 -10 -13   6    1.53    1.22
 -15  -8  14    4.02    1.34
 -23  -2  10    2.06    1.46
  -2 -14   6    0.19    0.87
   7 -14   0  101.70    2.62
  -4  -9  16   31.16    1.50
  10 -12   6   11.31    1.96
  14  -5  12   14.46    1.59
   0  -4  19  268.47    4.89
 -11  -8  16   40.63    1.71
   6   0  18   38.76    2.43
  -1 -14   6    4.11    1.03
  20  -4   6    1.43    1.50
  -5  -9  16   90.36    2.37
 -21  -3  13  575.82    8.04
 -21  -7   1  503.94    7.73
  -7  -5  19   67.77    2.34
  -9  -1  20  136.23    3.12
  19  -3   8    3.68    1.34
 -24  -1   2  183.15    3.80
 -16 -11   4    1.15    1.22
  13  -2  14   19.04    1.53
  18  -5   8   16.76    1.31
 -16 -11   2   26.61    1.43
  -5  -8  17   43.16    1.65
  14  -9   8   -1.37    1.09
  13  -9   9    5.95    1.00
 -21  -7   7   32.81    1.53
  -4  -8  17   17.20    1.46
 -11 -13   4   -0.65    1.12
   3  -1  19    1.99    1.18
   6 -11  11   33.87    1.81
  17  -9   4    0.34    1.09
   9 -12   7   18.57    2.37
  -3  -2  20    1.12    1.31
   2 -10  14   25.15    1.40
  17 -10   1    6.23    1.12
 -20   0  15   -0.75    2.93
  -7 -14   3   37.39    1.40
 -22  -6   2  401.58    6.73
 -10  -6  18    2.49    1.34
  -3  -5  19    2.77    1.40
  -3  -9  16   26.67    1.53
 -23  -4   1   55.71    1.96
  18  -9   2  161.47    3.27
  -3 -14   6    4.61    1.22
  -8 -13   8    3.05    1.34
  23   0   2  446.35    9.91
 -12 -11  11   13.27    1.40
  20  -6   4  144.05    3.24
  11 -13   0  155.17    3.37
   4  -6  17 1817.61   23.84
  14  -3  13    8.54    1.56
 -24  -2   6   41.60    1.71
  -8  -2  20  810.98   11.84
 -14 -12   3    3.18    1.25
   4  -4  18   44.84    1.74
   7 -10  12  546.31   10.75
   8 -13   5   33.34    2.21
 -12  -3  19    1.50    1.40
 -24  -2   3   26.70    1.59
 -11  -7  17   11.68    1.53
  -6  -8  17  186.89    3.55
   0 -14   6    1.81    0.78
 -20  -8   7   18.66    1.46
 -14 -12   2    0.53    1.09
  11 -12   5    9.04    1.90
  -6  -9  16   26.98    1.65
   1 -13   9  167.08    3.27
   6  -1  18  651.32    9.32
   5  -3  18    6.23    1.43
  21   0   6   35.15    2.65
 -12 -10  13   31.75    1.81
  -3  -8  17    3.65    1.31
 -19  -9   6   55.74    1.84
  15 -10   5   12.09    1.03
 -13  -9  14   21.41    1.59
  15 -11   2  993.42   13.71
  18  -7   6  173.37    3.52
 -18  -6  14   35.27    1.65
  -6 -13   9    4.14    1.15
   8  -2  17    0.31    1.46
   5 -10  13    6.04    0.84
   3 -14   5  158.07    4.83
   5  -7  16  822.35   12.74
 -20  -7  10  425.73    6.36
 -20  -1  15    2.80    1.46
  17  -8   6  112.27    2.52
 -13  -2  19    2.65    1.43
   7 -13   6   34.43    2.49
 -21   0  14  323.37    8.44
   9 -13   4   35.49    2.31
   4 -11  12   47.70    2.12
 -19  -5  14  218.67    3.96
  23  -1   2    8.48    1.34
  22  -5   1    2.24    1.34
  15  -9   7   39.04    1.46
 -18  -9   9  276.88    4.77
 -19  -6  13   38.29    1.81
  12  -9  10    3.68    0.97
 -14 -12   4    1.09    1.15
 -23  -4   8   13.40    1.56
  -1   0  20  661.35   14.46
 -19  -9   1   12.62    1.22
 -19   0  16   12.53    2.03
 -16 -11   5    1.31    1.18
  13 -12   2   44.25    1.40
 -10 -12  10 2027.28   25.74
   2 -12  11   24.43    1.62
 -16 -11   1   14.58    1.22
  21  -6   2   37.08    1.90
  -8  -5  19   47.95    2.46
   7 -14   1  733.27   11.68
   2  -7  17    5.08    1.50
  -2  -9  16   19.82    1.53
  -8 -12  11   62.13    1.93
  -4 -14   6    1.06    1.12
  10  -2  16  106.63    2.71
  14 -11   4   87.84    1.81
  21  -1   6   16.30    1.68
  12   0  15    0.47    1.93
 -16   0  18  774.02   17.04
  17   0  11    0.53    1.93
 -24   0   8   21.19    2.18
  -8 -11  13    0.06    1.22
 -16  -4  17  499.95    7.73
 -13 -12   7   20.97    1.43
   4 -13   8  172.53    4.77
 -14 -12   1    1.40    1.12
 -21  -6  10   10.63    1.40
 -11  -9  15  111.77    2.68
  12  -6  13   15.77    1.46
 -10   0  20  297.79    7.29
   1 -11  13  151.46    3.18
   8 -12   8   13.87    1.93
  -7  -8  17   90.67    2.37
 -22  -6   7   12.78    1.37
 -10 -10  14   15.39    1.56
  -6 -14   5  256.88    4.33
   2  -3  19   21.66    1.68
 -24   0   1   -1.68    1.81
 -18  -5  15    3.83    1.31
 -14  -4  18    4.71    1.34
   8  -5  16   41.97    1.87
   8 -11  10  246.50    5.98
   1 -14   6   19.60    0.81
  18   0  10   -0.31    1.59
 -21  -1  14  418.50    6.14
  11  -8  12    0.56    1.06
  -2  -5  19   16.67    1.53
  -7  -9  16   24.96    1.62
  -2  -2  20   25.55    1.74
  -4 -10  15   98.81    2.46
  22  -2   4    7.20    1.46
  -1  -1  20   26.89    1.62
 -23   0  11   -0.87    1.96
 -19  -1  16  162.59    3.68
 -15  -5  17   84.69    2.27
  -2  -8  17    0.50    1.28
 -24  -2   7  291.62    5.02
  -7 -14   4   67.46    1.84
   3  -9  15   15.21    1.40
 -15  -3  18   -0.06    1.62
 -15 -11   8   19.38    1.40
 -11 -13   5    1.78    1.12
 -11  -4  19   11.78    1.46
  17  -4  10   82.04    2.21
 -20  -5  13    7.01    1.50
  -5 -10  15   96.94    2.46
  16  -4  11   25.74    1.68
  12  -1  15    1.28    1.46
 -16  -1  18  481.84    7.63
  17  -1  11   90.80    2.46
  16   0  12   16.02    2.27
  -9  -2  20  647.77   10.63
  -3 -10  15  174.80    3.52
 -24  -2   2    0.25    1.46
 -24  -1   8  617.08    8.85
 -17  -6  15   -1.06    1.40
  20  -8   0   47.99    1.84
 -18  -7  13   11.62    1.53
  23  -3   1   19.07    1.56
  -5  -3  20    5.89    1.46
 -10  -1  20   22.22    1.62
 -17 -10   8    3.27    1.46
  -6  -3  20  476.33    7.73
   3  -5  18   76.06    2.43
   3  -2  19   38.73    1.87
  12 -12   4   80.48    3.24
   9  -4  16    3.02    1.50
 -23  -5   4  332.53    5.89
  -5  -7  18  406.22    6.86
 -22  -6   1   21.78    1.90
 -24  -1   1    0.90    1.34
  11 -13   1   26.52    1.53
  18  -1  10    0.56    1.37
 -18 -10   3   11.93    1.37
 -19  -8  10   10.44    1.37
  13  -5  13   19.41    1.46
 -23  -5   5  849.46   11.87
   9 -10  11   60.45    2.31
   3  -8  16   86.65    2.34
   6 -14   3  607.70   13.59
  11  -7  13   25.05    1.46
 -18 -10   4    3.80    1.25
 -22  -4  11    8.32    1.46
   5 -14   4   61.38    2.68
   6 -13   7    0.22    1.90
 -23  -1  11    2.74    1.46
 -17  -7  14    3.71    1.50
 -14 -12   5  165.95    3.12
  -4  -7  18   10.56    1.59
   1  -6  18   92.36    2.52
  19  -6   6   37.76    1.81
  10 -13   3  106.47    3.58
 -14  -7  16    3.37    1.34
  10  -5  15   12.25    1.40
  19  -5   7    4.24    1.40
  -6  -7  18  687.15   10.13
  21  -7   0   -1.90    1.37
 -16  -9  12   13.55    1.62
  -4  -3  20   35.77    1.81
 -15 -10  11   14.05    1.31
 -14   0  19   -0.62    1.74
   2 -13   9  148.88    4.64
   6  -2  18    1.78    1.43
   7  -4  17   25.89    1.68
  16  -1  12    6.48    1.50
  -6 -10  15   41.16    1.78
 -21  -7   8   -0.31    1.34
  -7  -3  20   71.20    2.21
  -1  -9  16    0.56    1.31
   5 -12  10   71.45    3.08
  -5 -14   6   29.60    1.40
 -17  -3  17  102.76    2.65
  18  -4   9   82.10    2.34
  -2 -10  15  243.48    4.77
   1  -4  19  716.01   11.09
 -19  -9   7  234.22    4.08
  -3 -12  12   16.02    1.25
  20  -3   7  481.81    8.19
   7  -6  16   42.10    1.81
 -23  -5   3  143.92    4.05
 -20  -6  12  333.81    5.23
  -7 -13   9   61.04    1.99
   9  -6  15   -0.65    1.31
  19   0   9    1.65    1.93
 -11 -11  12 1738.84   22.43
 -16 -11   6   -0.47    1.34
   6  -5  17    2.34    1.31
  -9  -5  19  171.09    3.52
 -20  -2  15  482.59    7.79
  16  -9   6   -0.93    1.15
  -4 -12  12   -0.16    1.22
 -18 -10   2    1.65    1.31
  14 -12   0    5.27    1.06
  -8 -14   2   22.09    1.12
  -8  -8  17    5.92    1.40
  -8 -14   1    5.83    1.15
  11  -9  11   25.30    1.22
 -19  -4  15  100.36    2.46
  23  -2   2    4.46    1.31
  15  -4  12    5.92    1.40
 -24  -3   5  276.10    4.83
  16 -11   0  147.82    3.02
 -20  -4  14   67.33    2.09
 -14  -8  15  469.72    6.73
 -24  -3   4  199.98    4.05
 -22  -3  12   73.54    2.24
  -3  -7  18   15.80    1.56
  23  -4   0  130.65    3.05
 -14 -10  12    9.10    1.25
 -18 -10   5   31.81    1.59
 -13  -5  18  170.75    3.61
 -23  -5   6   47.14    1.99
 -19  -7  12  289.66    4.99
 -11  -6  18    0.25    1.46
 -22   0  13   -0.62    1.96
 -23  -3  10   26.11    1.68
  -2 -12  12    9.41    1.22
   2 -14   6   51.79    2.74
 -14  -1  19  200.73    4.05
 -10 -13   7   11.87    1.37
  19  -8   3   19.88    1.43
 -20  -8   8    8.51    1.40
 -17  -9  11  303.27    5.08
   7 -14   2  137.16    4.14
  -8  -9  16    6.76    1.25
  21  -2   6   85.91    2.31
   8  -8  14    2.18    1.18
  19  -9   0   31.31    1.62
 -15  -9  13    4.14    1.31
  -1  -8  17    2.31    1.25
  13  -3  14    2.90    1.59
   4 -14   5  422.33    9.38
  -7  -7  18  380.92    6.36
 -18   0  17    1.46    1.90
   3 -10  14   34.87    1.56
 -16 -10  10   41.63    1.65
  -1  -5  19    8.13    1.50
  -3  -3  20    2.03    1.43
  19  -1   9   31.75    1.81
   6  -9  14    2.74    1.00
   0   0  20  937.52   20.16
  -9 -13   8  100.08    2.34
  -5 -12  12    6.36    1.25
 -12  -8  16  350.95    5.98
   8  -9  13   94.54    2.34
  15   0  13    0.22    1.65
 -21  -2  14  444.77    6.95
  20  -7   3    8.35    1.62
  -8 -14   3  125.82    2.59
 -17  -5  16   28.42    1.68
 -22  -5  10   32.31    1.71
  17 -10   2    6.45    1.22
  -1  -2  20  116.29    2.77
   6  -8  15  254.69    4.52
   8 -14   0  151.50    3.49
 -24  -3   6    0.47    1.59
   7 -12   9   35.55    2.62
 -19  -2  16  108.12    2.62
  -8  -3  20  362.13    6.48
  16 -10   4  523.69    8.04
 -24  -3   3   54.19    2.03
 -22  -1  13  228.71    4.42
  -9 -11  13    1.34    1.34
  -7 -10  15    0.62    1.46
   4   0  19    0.00    1.74
 -22  -6   8  101.70    2.43
  12 -11   7    1.90    1.84
   3 -12  11    6.42    1.37
  12  -2  15   40.35    1.93
 -16  -2  18  215.81    3.83
  17  -2  11  547.93    8.66
  11  -4  15   28.20    1.50
 -24  -2   8    0.93    1.40
 -14  -6  17  578.91    8.69
   2 -11  13  100.77    2.40
 -11   0  20    0.75    1.99
 -12  -7  17  180.47    3.80
  22  -4   3   15.70    1.71
 -18  -1  17    8.13    1.43
 -10  -2  20  249.99    4.55
 -23  -4   9    2.31    1.59
  -9 -12  11  135.67    2.99
  21  -5   4   28.57    1.53
  -1 -12  12    0.37    1.00
  -1 -10  15  188.14    3.71
  11 -11   8 1471.05   29.16
   8  -3  17   13.30    1.62
  -3 -13  10    1.28    1.22
  -7 -14   5   32.62    1.50
  18  -8   5   22.75    1.50
 -23  -5   2   37.80    1.90
 -24  -2   1   20.35    1.56
 -24   0   9   -0.59    2.21
   0  -1  20  152.65    3.52
 -13  -3  19    5.11    1.34
  -2 -13  10   43.34    1.53
  18  -2  10  205.18    3.89
 -16  -7  15   24.49    1.56
  15  -1  13   30.63    1.56
 -12 -12   9   50.79    2.03
  -2  -7  18    1.31    1.28
  21  -4   5   61.17    2.12
 -18 -10   1   20.63    1.43
  -2 -14   7   -0.62    1.06
 -21  -5  12   38.61    1.68
 -23  -2  11   20.04    1.62
 -12 -13   2   69.30    1.84
  19  -7   5  161.97    3.52
 -11 -13   6   46.93    1.71
 -18  -4  16    4.49    1.65
 -14 -12   6   10.25    1.34
  24   0   0   39.07    2.62
 -12 -13   3  333.06    5.33
  -4 -13  10   44.68    1.74
  -1 -14   7  112.24    2.31
   4  -1  19   53.59    1.90
  10  -3  16   29.26    1.74
 -21  -4  13  161.16    3.30
  15 -11   3   54.78    1.59
  18  -9   3   32.28    1.50
  16  -2  12  182.44    3.71
  19  -4   8  145.54    3.30
   0  -9  16    0.44    1.18
  13 -10   8    3.99    1.62
  -3 -14   7  139.22    2.90
  15  -7  10   98.09    2.52
 -18 -10   6   38.79    1.56
 -11  -1  20   13.52    1.40
  -8  -7  18  396.13    6.36
 -23  -5   7  394.60    6.26
  -6 -12  12    8.66    1.34
  -6 -14   6    4.61    1.28
  13 -12   3   66.49    3.15
  13 -11   6    2.12    2.27
 -16  -6  16  512.32    7.26
   5 -13   8    3.55    2.06
  16  -7   9   27.89    1.56
 -17  -8  13    7.70    1.31
   3  -7  17   11.37    1.40
 -14 -11  10   38.33    1.74
   9   0  17   -0.84    2.12
  -1 -13  10  154.14    3.02
  11 -13   2   -1.68    1.84
 -24  -1   9    0.28    1.46
  22  -6   0   84.29    2.46
 -11 -10  14    4.95    1.53
   5 -11  12   18.13    1.81
 -12 -13   1  337.30    6.11
  -9  -8  17   -0.06    1.37
  -2  -3  20   15.39    1.59
  14  -4  13    8.01    1.43
   7 -11  11  147.69    3.61
  22  -3   4  125.60    3.43
   5  -6  17 1239.42   16.86
  12 -10   9    4.18    1.40
 -13 -12   8   -0.75    1.18
   8  -7  15   46.49    1.74
   3 -13   9   86.78    3.40
  20   0   8   28.11    2.93
 -11 -12  10  682.26    9.78
  11  -6  14   40.97    1.93
  10  -8  13   55.00    1.99
  -8 -14   4    1.00    1.09
 -10  -5  19  111.83    2.87
 -12  -4  19   19.57    1.93
  20  -8   1   20.04    1.65
 -24  -3   7   76.50    2.21
  22  -5   2    1.99    1.46
   8 -14   1  581.96    9.53
  24  -1   0   50.17    1.87
 -12  -9  15    2.71    1.56
 -14  -2  19   99.74    2.65
 -13 -11  11   14.83    1.56
  10 -11   9    3.05    1.09
 -13 -10  13   71.23    2.24
  14 -10   7    4.33    0.84
   5  -4  18   -0.78    1.59
  14 -12   1   80.55    2.31
   0 -14   7   77.65    1.62
  -9  -3  20  479.20    7.35
   3 -14   6   82.07    3.55
 -24  -3   2   11.15    1.37
 -18  -8  12   36.52    1.65
  16  -6  10    1.59    1.22
  23   0   3   -0.84    1.90
  22   0   5   -2.09    2.03
  -9  -9  16   -0.56    1.34
 -16 -11   7   68.02    2.03
   0  -8  17    6.04    1.40
  -8 -13   9  104.29    2.46
 -12 -13   4   63.69    1.87
   6 -10  13   -0.22    0.78
  -5 -13  10    1.00    1.15
   3  -3  19   18.35    1.68
  -4 -14   7  509.83    7.91
  14  -7  11    1.00    1.28
 -18  -9  10    0.41    1.40
   0 -12  12   19.94    1.15
   9 -13   5    4.74    1.93
  19  -2   9   42.50    1.90
   9  -1  17   -0.59    1.59
  -4 -11  14   81.11    2.15
  15  -8   9  273.08    4.99
  16 -11   1   22.81    1.31
   8 -13   6   14.74    2.12
  12  -5  14  154.80    3.46
  -8 -10  15   76.90    2.27
 -14  -9  14    0.19    1.18
 -19  -9   8   11.68    1.46
   2  -6  18  490.94    7.76
   4  -9  15   33.12    1.43
   6 -14   4   88.90    3.43
  -3 -11  14   52.29    1.81
   7   0  18   23.37    2.40
  20  -1   8   13.74    1.59
  15  -6  11    8.13    1.59
  21  -7   1  140.00    2.96
  14  -8  10    3.15    1.40
 -20  -7  11   67.93    1.99
  17  -9   5   88.40    2.15
 -16  -8  14    1.71    1.43
 -22  -2  13  177.48    3.52
  17  -6   9   23.15    1.50
  10  -9  12    6.17    1.00
   0  -5  19   -0.22    1.50
   6  -3  18    3.24    1.31
  20  -5   6    0.25    1.37
   6  -7  16  352.44    6.04
  17  -7   8    3.21    1.31
  21  -6   3    3.40    1.65
   0 -10  15   47.36    1.84
 -17 -10   9   57.15    1.84
  -5 -11  14   51.85    1.81
   8 -10  12  713.98   12.87
 -21  -7   9    3.37    1.43
   0 -13  10  100.58    2.27
 -15 -11   9   23.12    1.34
  10 -12   7   63.85    2.84
  23  -1   3   14.33    1.43
  -1  -7  18    3.93    1.37
  22  -1   5   48.76    1.87
 -18  -2  17    9.35    1.68
   7 -14   3  694.35   14.77
  11 -12   6   62.32    2.93
 -21  -6  11  261.74    4.52
   2  -4  19  859.18   12.28
  11   0  16   40.57    2.74
  14   0  14   79.42    3.37
   0  -2  20  305.98    5.55
 -20  -3  15    0.28    1.43
  12 -13   0   -1.31    1.12
  15  -2  13  746.01   11.22
 -23  -5   1    6.95    1.59
  19  -9   1    2.34    1.28
  23  -3   2    2.09    1.43
   4  -8  16   17.36    1.43
  16  -8   8  101.86    2.49
   5 -14   5  486.46   11.87
  11 -10  10  651.60   11.34
  10 -13   4    2.03    2.18
  -7 -12  12    0.93    1.28
  -2 -11  14    6.45    1.31
   7  -1  18  340.01    6.01
  -5  -6  19    5.45    1.50
  20  -6   5   40.13    1.68
   4  -5  18   10.28    1.50
  10  -7  14  236.62    4.36
  18 -10   0   78.61    2.12
   1 -14   7  167.54    4.67
 -15  -4  18    0.69    1.50
  14 -11   5   90.49    2.40
 -12  -6  18    1.78    1.37
  -9  -7  18   92.70    2.56
   4  -2  19   19.63    1.59
   1   0  20 1222.37   24.21
   0 -15   0    1.46    1.53
  -6  -6  19  135.45    2.96
  21  -3   6    2.34    1.50
   7 -13   7   25.46    2.18
 -11  -2  20   11.15    1.40
  23  -4   1   75.75    2.18
 -20  -8   9    5.17    1.40
 -21  -8   4  405.54    6.42
  -5  -4  20    9.25    1.59
  -4  -6  19   66.59    2.46
  -6  -4  20   53.75    2.09
  15 -10   6  157.57    3.02
  -5 -14   7  194.34    3.46
  -6 -11  14    3.43    1.31
   1 -15   0   -0.50    1.06
  11  -1  16   12.71    1.68
 -24  -2   9   11.09    1.53
  14  -1  14   11.81    1.71
  -6 -13  10   12.06    1.37
   6 -12  10    3.15    2.03
   9 -12   8    2.15    1.84
 -18 -10   7   -0.62    1.40
 -21  -3  14   12.25    1.56
 -23   0  12    1.34    2.27
 -10 -11  13    2.56    1.18
   0 -15   1    0.56    1.15
  13  -8  11   42.25    1.84
 -23  -5   8  183.28    3.83
  -1  -3  20    1.00    1.68
  -9 -14   2   22.68    1.18
 -19  -3  16   47.33    1.78
 -21  -8   3  113.26    2.65
 -12 -13   5   86.19    2.12
  -1 -15   1    3.77    1.12
 -21  -8   5   60.36    2.09
   3 -11  13    0.34    0.65
 -22  -6   9    0.47    1.46
 -12 -11  12  732.83   10.56
  12 -12   5   68.02    3.05
 -12   0  20  233.66    6.23
   1  -9  16   13.74    1.25
   4 -10  14   66.12    1.96
  -9 -14   1   25.86    1.43
  24  -2   0    7.63    1.50
 -22  -7   4  702.61   10.13
  -4  -4  20    2.31    1.59
  14  -6  12    3.74    1.40
  -7 -14   6    4.42    1.31
   1  -1  20  171.78    3.65
 -17   0  18   25.39    2.90
  13  -7  12   81.42    2.34
   4 -12  11   18.48    1.43
  12  -3  15    6.64    1.50
 -16  -3  18   19.26    1.93
  17  -3  11  470.16    7.79
 -14 -12   7   13.46    1.43
  -7  -6  19  320.13    5.70
 -24  -3   8   37.36    1.87
  -7  -4  20   50.23    1.99
  -8 -14   5   14.43    1.34
 -10 -13   8   49.89    1.84
 -16  -5  17   67.12    2.27
   9 -11  10  482.90    8.54
 -19  -8  11  539.18    7.91
 -15   0  19    1.87    1.99
  18  -6   8    6.39    1.56
   1 -15   1    3.80    1.09
 -10  -3  20  153.61    3.52
   8 -14   2  154.24    4.74
 -10 -12  11   95.32    2.62
 -15 -12   3   22.40    1.43
   1 -12  12    8.88    0.75
 -17  -4  17  332.09    5.55
 -22  -7   5   94.23    2.52
 -10  -8  17    1.40    1.53
  20  -4   7   60.39    2.18
   9  -2  17   78.83    2.52
 -24  -3   1    1.65    1.40
 -14  -5  18  279.00    4.92
  -1 -11  14  147.23    3.12
  18  -3  10   51.01    1.99
  -3  -6  19   93.20    2.77
 -23  -1  12    3.21    1.43
  -9 -14   3  196.65    3.46
 -11 -13   7    4.14    1.37
   2 -15   0    9.44    1.15
   1 -13  10   68.86    2.09
 -24  -4   5   60.29    1.99
 -15 -12   2    9.91    1.37
 -22  -7   3  743.89   11.19
 -17 -11   3   14.30    1.31
 -23  -3  11   23.21    1.71
 -15  -7  16    6.33    1.40
 -24  -4   4   91.42    2.62
  -2 -15   1   11.78    1.22
 -22  -4  12   13.59    1.65
 -13  -8  16  396.56    6.33
  20  -2   8  214.34    4.27
 -12  -1  20   32.09    1.68
 -23  -4  10   52.25    1.87
 -24   0  10   89.80    3.21
 -11  -5  19    4.39    1.62
  17  -5  10    0.53    1.50
  17 -10   3  374.81    5.80
 -17 -11   4   -0.31    1.31
 -15 -12   4   35.49    1.65
 -17  -1  18  143.21    3.02
  -9 -10  15   87.90    2.46
   4 -14   6   65.22    2.99
  16  -5  11   34.87    1.81
  16  -3  12   85.34    2.24
  13  -4  14  149.97    3.27
 -15  -1  19  304.42    5.89
  18  -7   7    4.92    1.31
  23  -2   3    0.97    1.40
  17  -8   7   28.29    1.43
  -1 -15   2   35.93    1.53
  22  -2   5 1007.87   15.55
   1  -8  17   12.49    1.40
 -10  -9  16   24.30    1.68
 -20  -9   4   -0.09    1.34
   9 -14   0   96.75    2.59
   0 -15   2    1.22    1.09
 -13  -7  17  477.73    7.45
 -21  -8   2  171.28    3.40
   4 -13   9   50.23    2.77
   9  -5  16   11.37    1.40
  -3  -4  20    7.51    1.56
 -21  -8   6   29.54    1.53
  -7 -11  14   33.06    1.74
 -17 -11   2   76.81    2.31
  14  -9   9    9.13    1.09
  24   0   1   -1.46    1.96
  11 -13   3   10.19    2.24
   2 -14   7   86.65    3.58
   1 -10  15    1.03    1.12
   2 -15   1   29.85    1.22
 -20  -9   3   63.78    1.96
  12 -13   1   19.51    1.09
 -19  -6  14   12.21    1.56
   0  -7  18   18.98    1.87
  14 -12   2    0.34    1.03
  21   0   7    0.56    2.03
  22  -6   1   15.49    1.43
 -22  -5  11   93.01    2.37
 -24  -4   6  260.40    5.42
  -8  -4  20    6.36    1.43
 -15  -8  15  158.85    3.21
 -22  -7   6  115.01    2.74
   7  -2  18    0.81    1.56
  19  -8   4   -1.00    1.25
 -24  -4   3    8.94    1.53
  -8  -6  19  208.67    4.11
 -24  -1  10   -0.47    1.46
 -14  -3  19   34.52    1.90
  -2 -15   2   92.82    2.31
  -9 -13   9   27.76    1.56
  -8 -12  12   41.19    1.78
   7  -5  17   64.25    2.21
 -20  -9   5   10.28    1.34
  15  -9   8   23.34    1.40
   1 -15   2   19.41    1.09
 -15 -12   1    0.53    1.22
  -6 -14   7   28.17    1.53
 -21   0  15    2.03    2.84
   6 -13   8   91.33    3.80
 -16 -11   8   47.36    1.78
  10 -10  11   16.51    1.90
  18  -5   9   19.85    1.65
   1  -5  19    5.67    1.56
   8  -4  17    4.39    1.56
   8 -12   9  199.01    5.67
   7  -9  14    9.44    1.09
  13  -9  10    6.17    1.31
 -20   0  16   17.51    2.09
 -17 -11   5    7.63    1.34
  -7 -13  10   62.19    2.03
  -3 -15   1   64.90    1.81
  19  -3   9    0.78    1.59
   5   0  19   -0.12    1.96
 -12 -10  14   28.11    1.68
  11  -2  16    6.82    1.56
  14  -2  14   54.15    2.12
 -18  -6  15   14.08    1.50
 -25   0   5    0.44    1.90
  24  -1   1   -1.28    1.46
   8  -6  16   18.94    1.62
 -15 -10  12   31.63    1.65
 -22  -7   2   14.68    1.31
   3 -15   0   66.96    1.71
 -13  -4  19   52.00    2.43
 -10  -7  18    3.21    1.40
  16 -11   2 1957.64   24.74
  -9 -14   4   10.44    1.15
  -2  -6  19   10.44    1.50
 -16 -10  11  116.94    2.77
 -19  -5  15    1.56    1.31
  21  -1   7  267.59    4.80
  20  -7   4   -0.50    1.53
  15  -5  12   18.48    1.74
   4  -7  17    9.63    1.37
  20  -8   2   19.16    1.46
 -20  -5  14  123.55    2.80
 -25   0   4  359.30    9.00
 -15  -6  17  355.84    5.70
  13 -12   4  545.19   13.80
  23  -5   0   47.61    1.84
   7  -8  15  146.23    3.55
 -15 -12   5  162.84    3.15
 -22  -3  13  490.91    7.76
  12  -8  12   21.87    1.46
 -20  -6  13  214.41    3.96
 -20  -9   2    2.40    1.40
   1  -2  20  365.59    5.89
  10  -4  16    0.87    1.62
 -19  -9   9  337.64    5.23
   0 -11  14   68.67    1.90
  15 -11   4  101.64    2.21
  16 -10   5    8.41    1.15
 -17  -9  12    9.88    1.40
 -21  -1  15    0.93    1.43
  18 -10   1    9.19    1.25
 -18  -3  17    2.96    1.53
 -18  -7  14   14.12    1.43
   6 -11  12   50.01    2.12
 -12 -13   6   11.25    1.40
 -25   0   6   38.64    2.77
   3  -6  18 1478.88   20.69
 -13 -12   9   47.21    1.78
 -16  -9  13   37.48    1.81
 -17 -11   1    4.64    1.18
 -20  -1  16    1.34    1.56
 -13  -9  15  138.19    3.18
 -23  -6   4  238.80    4.42
   5  -1  19    1.46    1.50
  -3 -15   2   85.94    2.21
   0  -3  20   72.48    2.24
 -25  -1   5    1.22    1.59
  -2 -14   8   18.91    1.18
  15  -3  13  403.32    6.54
  13  -6  13   13.96    1.50
 -23  -2  12    9.57    1.96
   9  -8  14   13.59    1.34
 -12 -12  10   25.15    1.53
   7 -14   4   67.12    2.87
 -23  -6   5    4.24    1.40
   2 -15   2    4.58    1.25
  -2  -4  20   27.89    1.81
 -19  -7  13   88.62    2.34
  22  -4   4  108.62    2.77
   9 -14   1  209.79    4.18
   3 -15   1   24.15    1.46
  18  -9   4    1.65    1.15
 -25  -1   4    0.12    1.46
  -1 -15   3  124.04    2.52
  -3 -14   8   13.18    1.28
   9  -9  13    0.84    1.03
 -12  -2  20   40.10    1.90
  13   0  15    1.56    2.12
 -24  -4   7  153.30    3.74
   2 -13  10  115.57    3.86
  10  -6  15    2.59    1.50
  19  -6   7    1.71    1.31
  21  -7   2    6.33    1.37
 -20  -9   6    7.63    1.34
   2 -12  12   92.92    2.80
   6 -14   5  451.34    9.22
   0 -15   3    1.37    1.09
   4  -3  19    1.46    1.31
  -1 -14   8   12.25    0.97
 -17  -2  18   56.74    2.46
  16  -9   7   66.59    2.03
 -18 -10   8   21.16    1.56
 -21  -8   1    5.92    1.43
  11  -5  15   57.55    2.06
  -9  -4  20    0.03    1.65
 -25   0   3   -1.03    1.99
 -24  -4   2   93.23    2.52
 -11  -3  20   25.05    1.65
 -15  -2  19  260.27    4.61
 -21  -7  10   33.99    1.78
 -22   0  14  275.01    6.48
  12  -7  13   51.82    2.18
  22  -5   3   51.01    2.21
 -21  -8   7   22.15    1.50
  19  -9   2   58.24    1.90
 -23  -5   9    0.69    1.40
  -2 -15   3  337.52    5.42
   5  -9  15   19.69    1.28
 -25  -1   6  194.34    3.71
  -8 -11  14   64.44    1.99
   2  -9  16   40.01    1.62
 -22  -7   7    2.59    1.31
   3  -4  19  578.75    8.94
   2   0  20  998.68   21.44
 -23  -6   3   16.89    1.62
   6  -6  17  724.54   11.28
 -24  -3   9   28.04    1.81
  -9  -6  19   19.85    1.56
  -8 -14   6    3.71    1.31
  21  -5   5    1.22    1.46
  -6   0  21   -1.90    1.84
   8 -14   3  461.40   12.25
 -14 -10  13  125.85    3.02
  15 -12   0   64.75    1.93
   8 -11  11   72.85    2.49
  12  -9  11    1.12    1.03
  -5   0  21   -1.50    1.90
  -4 -14   8   96.25    2.31
 -18  -5  16   73.22    2.21
 -13  -6  18   59.92    2.06
  13  -1  15    0.84    1.37
 -23  -6   6  266.72    4.52
 -11  -8  17   14.86    1.50
   3 -14   7   11.06    2.06
 -17 -11   6    1.78    1.43
 -13 -13   2   26.61    1.53
  -4 -15   1  100.80    2.12
  24  -3   0   89.05    2.56
 -24  -2  10   10.59    1.56
 -11 -11  13    0.65    1.46
 -19   0  17    1.34    2.34
 -13 -13   3  439.22    6.89
 -17 -10  10  205.68    3.77
   6  -4  18   11.62    1.46
   1 -15   3  163.90    2.71
   7 -10  13    0.06    0.75
 -21  -5  13   18.54    1.62
 -14 -11  11   -0.47    1.56
 -25  -1   3    7.54    1.46
  19  -5   8    0.41    1.50
 -17  -7  15    7.63    1.46
   4 -11  13   57.92    2.34
 -22  -1  14  325.99    5.52
 -18  -9  11  573.89    8.16
   4 -15   0   51.23    1.87
  18  -8   6   39.42    1.74
 -10 -10  15    2.93    1.31
  -7   0  21   -0.97    2.24
 -25   0   7    1.65    2.15
 -13   0  20  569.15   12.03
   0 -14   8   59.83    1.53
   9 -13   6    8.85    2.12
   2  -1  20  125.98    3.08
  -1  -6  19   19.23    1.71
 -14 -12   8    0.41    1.50
 -22  -7   1  166.17    3.33
   9  -3  17    3.05    1.50
   5  -8  16    5.30    1.25
 -20  -8  10   18.60    1.53
  24  -2   1   -0.97    1.46
 -20  -4  15  130.28    2.87
 -20  -9   1   -0.19    1.18
 -15 -11  10   34.84    1.56
  -3 -15   3  422.70    6.76
  21  -2   7  574.36    9.35
  23  -4   2   17.26    1.53
  -6  -1  21   39.82    1.93
  -9 -14   5    1.43    1.34
 -17  -6  16   21.62    1.65
 -22  -6  10  104.51    2.68
  14  -5  13   -0.12    1.46
  -4   0  21    1.74    2.37
  -7 -14   7    5.98    1.34
  12 -13   2  147.85    4.71
   1  -7  18   47.33    2.06
  19  -7   6   53.22    1.99
  -4 -15   2   26.67    1.43
 -15 -12   6    0.90    1.37
  -5  -1  21   27.58    1.68
   5 -14   6    3.49    1.93
  10 -13   5   57.02    3.05
  20  -3   8   16.02    1.93
  12 -11   8  716.32   11.90
   5 -12  11   18.01    1.37
   2 -10  15    1.43    1.06
  23   0   4   66.03    3.24
 -12  -5  19  124.57    2.90
 -15  -9  14    9.53    1.53
 -19  -1  17   17.04    1.68
   2  -8  17   19.19    1.46
   3 -15   2    0.75    1.22
 -13 -13   1   97.47    2.06
 -11  -9  16   -0.37    1.46
   5  -5  18   -0.65    1.43
  -9 -12  12  340.94    5.58
 -19 -10   4   30.94    1.62
  21  -4   6   54.34    1.99
 -11 -12  11   10.81    1.46
  -8 -13  10   75.22    2.34
 -13 -13   4   48.05    1.74
  13 -11   7    1.00    1.28
 -21  -2  15  862.27   13.27
 -19 -10   3    3.89    1.34
  23  -3   3   82.17    2.37
  -5  -9  17 1534.81   20.57
  22  -3   5  174.34    4.02
  -7  -1  21  475.74    8.01
 -25  -1   7   18.17    1.84
  -4  -9  17  799.98   11.56
  21  -6   4   56.68    2.15
 -13  -1  20   -0.62    1.53
   5 -10  14    0.37    0.90
  -3 -13  11   40.41    1.71
   1 -11  14    7.10    1.12
  17 -11   0  148.91    3.15
   7  -7  16  146.48    3.37
 -20  -7  12  346.18    5.64
   8 -13   7   12.15    2.18
 -20  -2  16   54.93    2.03
   9  -7  15    2.21    1.28
 -23  -6   2   29.26    1.78
   5  -2  19   25.89    1.59
 -25  -2   5    4.80    1.68
  -4 -12  13    8.82    1.22
  -3 -12  13   11.47    1.28
 -11 -13   8   -0.59    1.37
 -21  -4  14  143.18    2.99
 -25   0   2  146.63    4.67
  -5 -14   8   56.18    1.93
   4 -15   1    2.65    1.22
 -10 -14   2  185.52    3.80
   7 -12  10  192.66    5.76
  -8   0  21   -1.37    2.24
 -21  -6  12  351.72    5.67
  -2 -13  11   95.88    2.46
  -1  -4  20   62.41    2.40
  -4  -1  21   23.68    1.78
  -4 -13  11   11.40    1.34
   5 -13   9   61.17    3.21
 -19  -4  16    0.06    1.62
 -25  -2   4   22.81    1.62
   7  -3  18   67.74    2.24
   2 -15   3  228.93    4.33
  23  -1   4    0.78    1.56
  18   0  11   -0.31    2.27
 -11  -7  18   17.73    1.74
  -6  -9  17 1443.60   19.23
 -20  -9   7   11.81    1.34
 -13 -11  12  149.10    3.21
  11 -11   9    0.84    1.28
 -10 -14   1  278.38    5.30
 -19 -10   5   11.93    1.50
  12  -4  15   12.40    1.43
 -16  -4  18    1.34    1.56
  17  -4  11   47.17    1.93
 -24  -4   8   69.42    2.37
  -3  -9  17  509.95    8.13
 -18  -8  13   -0.19    1.40
   9 -10  12  647.39   11.68
   9 -14   2   78.46    3.33
 -23  -6   7    0.75    1.43
  -5 -12  13   16.58    1.50
 -10  -4  20   19.32    1.81
 -10 -14   3    4.83    1.15
  14 -12   3  130.00    4.33
  -2 -12  13  123.51    2.77
   8   0  18    1.22    2.43
  17   0  12    5.98    1.96
  10   0  17    1.00    2.52
 -25  -2   6   49.95    2.03
   1 -14   8    3.99    1.78
 -19 -10   2    9.88    1.34
  -3   0  21    2.18    2.12
  -1 -15   4   -0.31    1.12
 -10 -13   9   12.53    1.53
  -5  -8  18  114.82    2.80
   2  -5  19    6.57    1.68
 -24  -4   1   14.40    1.65
  11  -3  16    0.75    1.40
  14  -3  14  267.44    5.05
 -24   0  11    1.09    1.99
  17  -9   6   -0.90    1.28
  18  -4  10  111.52    2.93
 -25  -1   2  119.84    2.96
  11  -8  13   18.35    1.59
  -8  -1  21  449.91    7.82
  11 -13   4   10.63    1.84
  -4 -15   3  319.07    5.27
 -23  -4  11   18.70    1.56
 -17  -8  14    1.31    1.56
  -4  -8  18   20.47    1.56
  11 -12   7   64.37    2.87
  -2 -15   4   76.37    1.99
  -1 -13  11  276.60    4.83
 -10  -6  19    2.15    1.50
  13  -2  15    0.84    1.65
 -14  -8  16  342.03    5.45
   0 -15   4   39.51    1.31
  18  -1  11  122.33    3.02
  -5 -13  11   54.81    1.81
  22  -6   2    8.69    1.68
  19   0  10   18.63    2.21
  22   0   6    8.66    2.24
   3 -13  10  104.63    3.77
 -15  -5  18  235.91    4.36
  -6  -8  18    3.58    1.40
  14 -11   6  176.92    4.05
  -4 -10  16    4.33    1.22
  21  -8   0   72.29    2.12
  -9 -11  14   10.44    1.43
 -12 -13   7   85.69    2.27
 -22  -7   8   18.42    1.59
   1  -3  20  120.65    2.87
  -5 -10  16   52.04    1.96
  16  -4  12  151.12    3.55
 -25  -2   3    6.45    1.74
 -21  -8   8    0.00    1.31
 -14  -7  17  637.86    9.38
 -16   0  19   -3.96    2.21
  13 -13   0    7.35    1.25
  24   0   2    4.89    2.18
  23  -5   1   54.12    2.03
  -5 -15   1   94.38    1.93
  14 -10   8   16.89    1.18
 -22  -2  14  404.32    6.26
  13 -10   9  125.32    2.27
  -5  -5  20  130.15    3.15
 -16 -11   9   25.46    1.50
  -6  -5  20   93.60    2.74
   8  -1  18   50.32    2.03
  17  -1  12  104.38    2.87
  10  -1  17    4.14    1.43
 -25   0   8    2.21    2.40
  -7  -9  17 1048.60   15.11
 -13 -13   5   11.65    1.43
   2  -2  20  189.98    3.80
  -3  -1  21    5.67    1.43
   3 -12  12    6.11    1.65
  17 -10   4  237.46    4.30
  12 -12   6    7.26    2.31
  15 -12   1   35.27    1.37
 -24  -1  11   17.60    1.62
 -17 -11   7   80.08    2.15
 -23   0  13   -0.59    1.99
  10 -12   8    6.73    2.12
 -23  -3  12   11.90    1.59
  -3 -10  16    5.70    1.37
  11  -9  12   -0.22    1.03
  10 -14   0  120.84    2.96
  18 -10   2   -0.25    1.18
  12  -6  14   13.43    1.65
  -6  -2  21  159.25    3.33
  16 -11   3  149.44    2.87
   5 -15   0    1.03    1.18
  -2  -9  17  198.39    3.77
  -6 -12  13   10.87    1.46
  -5  -2  21   43.50    2.12
  -3  -8  18    6.95    1.46
  -5 -15   2   10.13    1.31
  -9   0  21   -1.40    2.27
  -3 -15   4  226.25    4.02
 -12  -3  20   -0.03    1.43
  -1 -12  13  215.84    3.99
 -19  -8  12  271.36    4.86
  19  -1  10    8.10    1.46
   7 -13   8   82.45    3.27
  22  -1   6   56.37    2.12
  -4  -5  20   67.49    2.21
 -19  -2  17   13.12    1.50
  -6 -10  16   93.07    2.46
 -14  -4  19   80.08    2.52
   0  -6  19  214.41    4.11
  20  -6   6    0.09    1.28
 -10 -14   4    1.18    1.28
 -17  -3  18    5.64    1.62
   4 -14   7   57.96    3.18
   1 -15   4   78.08    2.15
   4 -15   2    4.46    1.28
  -7  -5  20  104.82    2.68
  20  -9   0    8.35    1.46
 -16  -1  19   56.40    2.12
 -19 -10   6    0.75    1.25
  24  -1   2   38.17    1.90
 -15  -3  19   31.53    2.31
 -13 -10  14   19.94    1.62
  -6 -14   8   10.50    1.34
  -7  -8  18    1.84    1.59
  16   0  13   -3.27    2.18
  -7  -2  21  237.59    4.52
 -25  -2   7  336.92    5.64
 -16  -7  16    7.38    1.53
 -13  -2  20   90.80    2.59
 -17  -5  17   13.18    1.62
 -25  -1   8  990.95   13.62
   3 -15   3   37.30    1.50
  20  -5   7   80.58    2.34
  19  -4   9   71.63    2.40
  22  -7   0   44.40    1.99
 -23  -1  13  155.86    3.65
 -19  -9  10   11.68    1.53
  10 -11  10  792.56   13.55
 -23  -6   1   95.10    2.71
   3  -9  16   22.56    1.43
  20  -8   3   10.97    1.46
  15 -10   7   37.24    1.40
 -24  -5   5  845.53   13.55
 -18 -10   9    5.02    1.43
  12 -10  10  151.71    3.89
   5  -7  17   72.48    2.34
 -19 -10   1    5.61    1.46
  -4  -2  21  133.86    3.37
 -24  -5   4  275.29    5.76
   0 -13  11  400.46    6.08
 -22  -5  12  148.78    3.02
 -18   0  18    9.19    2.40
   4  -6  18 1119.39   16.05
 -15 -12   7   18.29    1.59
  -9  -1  21  404.13    6.61
  -9 -14   6   13.18    1.43
  11  -7  14   12.34    1.46
  -6 -13  11    2.87    1.28
  -2   0  21    0.19    2.46
  23  -2   4   48.76    1.93
 -22  -4  13  145.89    3.08
 -23  -5  10   39.95    1.81
 -24  -3  10   -0.25    1.90
  -2 -10  16   35.18    1.78
   7 -14   5  245.53    6.14
  -8 -14   7    0.59    1.28
 -25   0   1   -0.65    2.09
  13  -5  14   30.10    1.90
  16  -7  10  152.52    3.40
 -12  -8  17    2.99    1.40
   2 -14   8   16.92    2.06
   8 -14   4   41.57    2.93
 -11 -10  15    8.41    1.50
  16  -1  13  320.28    5.61
 -18  -4  17   16.17    1.56
   5 -15   1   40.51    1.59
  20   0   9    0.53    1.87
  -3  -5  20   11.78    1.71
   2 -11  14   38.26    1.53
   3   0  20  345.18    8.19
  17 -11   1   14.52    1.28
   0  -4  20   69.17    2.27
  24  -3   1   65.12    2.27
  13 -12   5    0.62    1.87
  -5 -15   3   95.78    2.24
 -16  -8  15    6.61    1.40
  15  -4  13  586.35    8.66
  -8  -9  17  305.70    5.20
  -9 -13  10  152.52    3.30
 -25  -2   2    1.37    1.56
  21  -3   7  871.24   12.90
  -7 -10  16   27.05    1.59
  -2  -8  18    7.42    1.53
   6   0  19    2.06    1.78
   2  -7  18   29.13    1.74
  -8  -2  21  143.49    3.33
  12   0  16   86.72    3.71
 -23  -6   8    1.81    1.46
  -4 -15   4  155.36    3.02
 -14  -9  15  331.44    5.98
 -24  -5   6   41.88    1.90
  19  -8   5   10.66    1.31
  -8  -5  20   19.01    1.81
 -18  -1  18    0.41    1.62
   9 -12   9  251.67    6.95
   7 -11  12  122.86    3.37
  -2  -1  21    5.89    1.68
  15  -7  11   93.70    2.40
 -24  -5   3    8.29    1.53
  18  -2  11  362.72    6.29
 -10 -12  12  565.63    8.38
   3 -10  15    6.39    1.22
  17  -7   9    0.97    1.34
  19  -9   3    7.79    1.40
  12 -13   3   19.97    2.68
 -20  -9   8   11.97    1.53
   4  -4  19  237.99    4.30
  21  -7   3   10.22    1.53
  -7 -12  13   80.30    2.43
   2 -15   4   36.46    1.46
 -12 -11  13   43.65    1.81
   8  -9  14   11.59    1.25
 -13 -12  10   15.58    1.62
 -25  -1   1   -0.12    1.40
 -16  -6  17  156.79    3.18
  15  -8  10   -0.53    1.46
  -1  -9  17   43.31    1.81
  15 -11   5   20.22    0.97
 -21  -3  15   -0.81    1.46
 -11  -4  20    2.43    1.40
   0 -12  13  117.88    2.68
  -8  -8  18   48.73    2.06
  10 -14   1   63.97    1.81
   6 -14   6    1.34    1.68
   8  -2  18    1.00    1.50
  17  -2  12   87.09    2.56
  10  -2  17  166.51    3.61
  20  -1   9  106.69    2.99
   8  -5  17   50.63    2.03
  16  -8   9   68.86    2.18
   5 -11  13   37.89    2.03
 -21  -7  11    4.77    1.59
  -3  -2  21    1.74    1.53
 -20  -3  16    8.32    1.59
  13 -13   1   35.99    1.46
   3  -8  17   33.62    1.68
   5  -3  19   26.05    1.81
   3  -1  20   53.66    2.18
 -24  -4   9   65.28    2.40
 -25  -3   5    0.53    1.31
 -14  -6  18  242.51    4.49
 -24  -2  11   14.33    1.78
 -12  -9  16    0.22    1.56
 -13  -5  19   41.75    1.93
 -14   0  20  412.89    9.32
 -16 -12   3    4.89    1.25
   6  -1  19   10.53    1.46
  12  -1  16    2.21    1.43
   6  -9  15   20.97    1.34
 -13 -13   6   50.76    1.78
   8  -8  15   23.65    1.56
 -25  -3   4   34.93    1.99
 -10   0  21    0.69    2.34
  -5  -7  19    4.77    1.43
  20  -7   5   27.05    1.71
   9 -14   3   67.30    3.33
  19  -2  10  406.91    6.76
 -14 -12   9   11.15    1.53
  22  -2   6   73.38    2.43
 -10 -14   5   21.03    1.43
  24  -4   0    8.29    1.59
 -16 -10  12    5.02    1.53
 -11  -6  19   -0.56    1.68
  17  -6  10    3.77    1.50
 -12  -7  18  147.16    3.24
  10  -5  16   72.97    2.34
  -6  -7  19   11.47    1.53
  16  -6  11   23.65    1.74
 -16 -12   4   15.45    1.50
 -16  -2  19  385.75    6.23
  24  -2   2  124.92    2.96
  -1 -10  16   58.17    2.06
  -1 -15   5   35.77    1.46
 -16 -12   2   76.56    2.27
  -6 -15   1    4.99    1.34
  -2 -15   5  200.10    3.80
  -4  -7  19    3.24    1.43
 -25  -2   8   10.00    1.62
 -25  -3   6    0.16    1.74
 -19 -10   7   21.13    1.62
 -10 -11  14  156.76    3.43
   6 -12  11   11.22    1.62
  14  -8  11   31.13    1.81
   9  -6  16    4.08    1.50
   1 -13  11  496.40    8.94
  18  -9   5  111.36    2.74
   9  -4  17    4.77    1.53
  -2 -14   9   21.97    1.31
 -25   0   9   -0.34    2.18
  -7 -14   8    0.41    1.37
  -3 -14   9    1.43    1.09
 -14  -1  20    6.45    1.81
  -7 -13  11   -0.06    1.40
 -23  -2  13  222.26    4.18
  16 -10   6  103.11    2.27
  15   0  14   83.48    3.55
  11 -10  11   22.31    2.06
  -6 -15   2    2.15    1.28
 -12 -12  11    3.21    1.34
 -22  -6  11   44.50    1.93
  -2  -5  20   16.39    1.71
   4 -13  10    5.05    1.87
  -4 -11  15   44.59    1.81
   4 -15   3   71.07    1.71
  22  -5   4   40.72    1.99
 -10  -1  21  511.04    7.79
 -22  -7   9    3.52    1.56
  20  -4   8  168.38    3.55
  -9  -2  21  263.08    4.89
   0 -15   5    5.17    0.84
   6 -13   9   38.73    2.80
  13  -3  15   98.37    2.74
 -24  -5   7  722.30   11.22
  21  -8   1    0.31    1.56
 -20  -8  11  749.81   10.34
   6 -15   0   86.40    2.56
   5 -15   2  114.91    2.68
  14  -7  12   28.98    1.71
  -5 -11  15   61.88    2.09
 -17 -10  11  410.96    6.36
   7  -6  17  266.97    5.30
   6  -8  16    1.81    1.59
  17  -8   8   28.57    1.87
  -8 -10  16   12.93    1.46
  -1   0  21   -1.65    2.21
  -7  -7  19  129.96    3.24
  -9  -5  20    0.09    1.50
 -25  -3   3   27.45    1.62
 -21  -8   9    6.04    1.40
  19 -10   0   15.02    1.37
  -3 -11  15  103.17    2.80
 -24  -5   2   -1.99    1.71
 -15 -10  13  111.05    2.84
  -3 -15   5  222.26    4.02
  18  -7   8   10.06    1.50
  15 -12   2   30.44    1.12
  23  -4   3   -0.50    1.53
  -1 -14   9  189.42    3.46
 -22  -3  14   10.38    1.43
  16  -2  13 1243.97   17.08
  -1  -8  18    1.59    1.46
  22  -4   5  193.50    4.21
 -17 -11   8   50.26    1.74
  18  -6   9    8.63    1.53
  -5 -15   4   60.60    1.87
  -4 -14   9    2.80    1.18
   1  -6  19  523.38    8.79
   3  -5  19    0.25    1.62
   2  -3  20   45.06    2.12
 -17  -9  13   51.07    2.06
   6 -10  14    1.87    0.90
 -25  -1   9   35.12    1.99
 -18 -11   3    1.81    1.28
   8 -10  13    0.09    0.97
  -3  -7  19   13.30    1.43
  15  -1  14   68.86    2.15
  -9  -9  17    1.62    1.46
   4 -12  12    6.64    1.56
   9 -11  11   34.84    2.06
 -19  -6  15   75.65    2.34
 -11 -13   9   19.79    1.53
  -6  -3  21  546.94    8.69
 -18 -11   4   10.06    1.37
  15  -6  12   30.97    1.84
 -20  -6  14  121.58    2.77
 -16 -12   5   60.17    1.81
 -12 -13   8    1.12    1.25
 -18  -2  18    9.60    1.59
   7  -4  18    3.68    1.40
  -5  -3  21  201.88    4.46
   3 -14   8   10.28    2.06
  10  -8  14   40.26    1.90
  23  -6   0   21.72    1.78
   3 -15   4   13.49    2.31
  10  -9  13   33.31    1.46
  -2  -2  21   75.72    2.37
  20  -9   1    0.78    1.28
 -16 -12   1    2.96    1.15
  10 -13   6    3.61    2.27
 -19  -3  17   15.27    1.59
 -15 -11  11   35.15    1.90
  -9  -8  18   61.45    2.09
   5 -14   7  200.66    5.30
   6  -5  18    1.34    1.31
  14 -12   4 1261.91   24.40
  -1  -1  21    4.92    1.59
  -6 -11  15    7.51    1.31
 -18  -9  12   72.60    2.21
  -6 -15   3    0.97    1.22
  -8 -12  13  152.09    3.24
 -25  -2   1   36.80    1.93
   1 -15   5   45.40    1.62
  -7  -3  21  531.42    9.66
  21   0   8  128.00    4.83
 -11 -14   2  242.36    4.36
 -25  -3   7   86.28    2.43
   1 -12  13  174.62    3.40
 -13  -3  20   27.70    1.74
   0  -9  17   -0.72    1.28
  -2 -11  15   80.42    2.24
  20  -2   9   10.38    1.62
   9 -13   7    3.12    1.87
   3  -2  20   68.52    2.27
  11  -4  16   11.40    1.62
  14  -4  14  116.75    2.93
 -20  -5  15    7.51    1.62
   8 -12  10  644.40   14.74
  15  -9   9    2.06    1.18
 -18 -11   2   40.54    1.78
 -19  -7  14   -0.84    1.65
  23  -5   2    4.08    1.65
  22  -7   1    8.88    1.50
   6  -2  19  107.87    2.87
  12  -2  16   38.86    1.87
   0 -14   9  838.06   13.30
  -4  -3  21   13.49    1.87
   6 -15   1  167.70    3.61
 -11 -14   3    0.72    1.25
 -14 -13   3  459.47    7.23
  25   0   0   22.43    2.65
  -4 -15   5  103.64    2.52
 -14 -11  12   20.75    1.56
 -18 -11   5    1.96    1.34
  23  -3   4    5.14    1.43
 -21   0  16   97.75    3.65
  14  -9  10    0.44    1.15
  -8  -7  19    7.17    1.53
 -14 -13   2   32.16    1.53
 -16  -9  14    2.21    1.59
 -11 -14   1  471.87    8.04
  11 -13   5   17.73    2.09
  -5 -14   9    0.65    1.34
 -22  -8   4  147.35    3.12
 -15 -12   8   12.59    1.43
  10 -14   2    0.37    2.27
   1  -4  20   78.89    2.34
  21  -5   6   14.71    1.56
  13  -8  12  105.38    3.21
  18 -10   3  250.24    4.36
  11  -6  15    1.06    1.43
  -9 -14   7   34.31    1.62
   0 -10  16   24.71    1.56
 -24   0  12   23.31    2.15
  22  -6   3  104.01    2.87
 -23  -6   9    2.46    1.43
  21  -1   8   43.40    2.03
   3 -11  14    6.64    0.97
 -22  -8   5  390.86    6.08
 -16 -11  10   20.63    1.62
 -11   0  21   -0.09    1.96
 -18  -7  15   26.61    1.71
   8  -7  16   54.84    1.99
 -14  -2  20   34.59    1.78
 -21  -5  14   77.84    2.43
 -23  -4  12    0.22    1.68
 -25  -3   2    0.90    1.53
 -22   0  15    0.97    2.40
  -2  -7  19    0.06    1.37
  23   0   5    2.06    2.52
  21  -6   5   22.06    1.78
   4  -9  16    3.68    1.28
  -8  -3  21  992.70   15.02
  16  -9   8   49.11    1.65
 -22  -8   3   95.50    2.56
  17 -11   2 2013.78   25.55
 -14 -13   4   24.62    1.50
  -1  -5  20  141.43    3.05
 -15  -8  16  243.42    4.33
 -19  -5  16    0.09    1.28
 -15  -7  17  677.87   10.31
 -10  -2  21  368.80    6.17
  13 -13   2    8.32    2.56
 -10 -13  10  241.64    4.92
  25  -1   0    0.56    1.56
 -18  -6  16    3.93    1.62
  16 -11   4  267.10    4.52
 -12  -4  20   12.90    1.46
 -21  -1  16  176.08    3.52
   2 -13  11  176.80    4.42
  18  -3  11  452.84    7.48
 -10 -14   6    2.21    1.37
  24   0   3   -1.90    1.99
 -12 -10  15   63.13    2.31
 -20  -7  13  136.82    3.15
  -7 -11  15    9.53    1.53
  -8 -13  11   -0.47    1.43
 -17  -4  18   26.08    1.62
 -21  -6  13  112.83    2.71
  12  -5  15    8.04    1.74
 -16  -5  18  267.22    4.80
  17  -5  11  111.67    2.93
  19  -6   8    5.30    1.50
 -24  -5   8  139.16    3.27
 -13 -13   7    1.74    1.31
 -15  -4  19   37.89    1.81
 -24  -1  12    1.43    1.53
  18  -8   7    1.00    1.62
 -14 -13   1    0.81    1.06
 -20  -9   9  141.84    3.12
 -21  -9   4    8.51    1.43
 -10  -5  20    1.56    1.59
  -9 -10  16   87.25    2.49
 -13  -8  17   31.72    1.65
 -11 -14   4  193.97    3.65
  -1 -11  15   22.87    1.65
   8  -3  18  122.33    2.96
  17  -3  12  184.56    3.77
  10  -3  17   13.99    1.71
   8 -13   8   21.03    2.52
   3  -7  18   26.86    1.65
  -3  -3  21   61.01    2.46
 -18 -10  10  386.50    5.95
 -20   0  17   -1.15    1.99
 -23  -7   4  839.74   11.65
   2 -15   5   55.03    2.84
 -11  -1  21  336.21    5.67
 -11 -12  12  516.71    7.79
 -16 -12   6   25.89    1.62
 -24  -5   1    0.81    1.37
 -25  -2   9  194.59    3.71
 -24  -3  11   14.49    1.46
  18  -5  10   10.84    1.59
  13  -7  13    4.52    1.53
  15  -2  14  166.76    3.71
 -22  -1  15   30.69    1.68
 -23  -7   5  143.52    3.21
   0  -8  18   11.22    1.53
  23  -1   5   61.66    2.24
  -8 -14   8   17.20    1.50
 -14 -10  14    2.06    1.56
 -19 -10   8    4.24    1.59
 -18 -11   1   18.70    1.53
  11 -14   0   31.07    1.50
  16 -12   0   84.44    2.21
  14  -6  13   -1.53    1.46
  13  -9  11   20.81    1.31
 -23  -5  11   41.54    1.87
  -6 -15   4    0.06    1.15
   4 -10  15   19.91    1.37
 -21  -9   3  249.21    4.92
   5 -15   3  505.34   12.71
 -22  -8   6    4.42    1.46
 -21  -9   5    2.24    1.50
   8 -14   5   99.43    3.93
 -12  -6  19   12.06    1.53
  10  -7  15    1.53    1.28
  19  -7   7   33.87    1.84
  19  -3  10   69.77    2.37
 -17   0  19   -1.68    2.21
  22  -3   6    4.27    1.65
  17 -10   5   33.31    1.53
  24  -1   3    5.42    1.53
 -24  -4  10   65.71    2.27
   1 -14   9  937.80   20.66
  10 -10  12  431.96    8.72
   5  -6  18 1118.68   15.33
  -7 -15   1  171.38    3.86
   0   0  21    0.28    2.12
  -1  -2  21  153.12    3.40
  16  -5  12    9.32    1.59
  13 -11   8  371.95    7.20
 -16  -3  19   -0.56    1.78
 -18 -11   6    0.56    1.43
  24  -3   2   42.81    1.93
 -19  -9  11  287.04    4.99
  -7 -15   2   18.85    1.34
  -5 -15   5   23.90    1.43
  -6 -14   9    1.65    1.25
 -25  -3   8   18.48    1.65
 -10  -9  17   44.03    1.96
   4   0  20   94.85    3.80
  12 -13   4   50.32    3.37
   4 -15   4  276.66    6.17
  14   0  15   -1.99    2.49
 -23  -7   3  560.93    8.54
 -20  -1  17   64.56    2.65
   6  -7  17   36.08    1.78
  -9  -7  19   20.44    1.68
  24  -4   1    0.78    1.37
 -22  -8   2   69.61    2.27
 -11 -11  14  548.87    8.63
   7 -14   6    9.38    2.21
 -23  -3  13  207.21    4.36
 -10  -8  18   12.40    1.62
   9 -14   4    6.20    2.37
   9   0  18   46.99    3.05
  21  -4   7  160.19    3.77
   6 -15   2  486.67    7.95
  19 -10   1    7.82    1.40
  20  -8   4   19.13    1.50
   4  -8  17  298.38    5.30
  12 -11   9   64.41    2.27
 -14 -13   5   49.26    1.81
 -25   0  10  141.28    4.18
 -13  -9  16    8.51    1.37
  -9  -3  21  927.83   15.08
 -13  -7  18  263.23    4.52
 -23  -7   6  251.05    4.30
 -17  -1  19    3.80    1.50
  -2 -15   6   12.78    1.28
   7 -15   0  436.04    7.82
 -14  -5  19   54.09    2.12
  -9 -12  13  135.20    3.02
 -13 -11  13   51.85    1.99
  14 -11   7   44.43    1.99
  -1 -15   6    3.65    1.03
  12 -12   7   35.43    2.56
   0  -1  21   53.28    2.24
   2 -12  13   72.79    2.59
 -21  -4  15  176.95    3.46
   4 -14   8    3.12    1.96
  16  -3  13  261.33    4.74
  17  -9   7   20.32    1.50
   5 -13  10   10.81    2.06
   1  -9  17   62.32    2.15
 -18  -8  14   -1.96    1.53
  21  -2   8  382.76    7.48
  11 -12   8   13.24    2.65
   6 -11  13   12.87    1.78
   4  -1  20   20.66    1.93
  -3 -13  12   22.75    1.43
 -21  -9   2   32.09    1.68
  14  -1  15   25.83    1.90
  -1  -7  19   30.32    2.18
 -20  -4  16   21.94    1.59
  19  -5   9    3.33    1.31
   5  -4  19   29.04    1.68
   2  -6  19  591.74    9.19
 -21  -9   6   15.27    1.56
 -25  -4   5   17.11    1.59
  -7 -15   3   -0.09    1.12
 -15   0  20  194.34    5.61
  -4 -13  12   27.67    1.56
  14 -13   0    8.94    1.40
  -3 -15   6    0.62    1.15
 -23   0  14   64.03    3.27
   9  -1  18    1.43    1.84
  -8 -11  15    7.73    1.43
 -17  -7  16   -0.87    1.34
 -22  -7  10   14.77    1.59
 -19  -8  13  103.32    2.93
 -25  -1  10   38.98    1.78
 -15  -9  15  176.17    3.55
 -25  -4   4   44.09    1.99
 -18  -3  18    9.47    1.71
  19  -9   4    3.83    1.37
  25  -2   0   23.59    1.62
  -2  -3  21   85.13    2.59
   1 -10  16   16.73    1.31
 -21  -2  16    8.38    1.56
   0 -15   6    0.31    1.09
  21  -8   2    0.22    1.53
 -15  -6  18  249.90    4.33
 -22  -5  13   10.25    1.59
  -2 -13  12   10.91    1.22
 -11 -14   5  301.18    5.14
  11   0  17    1.43    2.43
   0 -11  15    1.22    1.34
 -17 -11   9   35.12    1.84
  15 -12   3  111.27    2.56
   8 -11  12  204.47    4.55
 -25  -3   1   23.77    1.96
 -24  -2  12   27.08    2.03
  23  -6   1   20.53    1.90
 -21  -8  10   16.83    1.68
  12  -8  13    3.99    1.40
  -5  -6  20   16.51    1.90
 -18  -5  17   -0.06    1.31
  13 -12   6   84.69    3.43
  21  -7   4   60.20    2.31
  -6  -6  20   18.13    1.93
 -25  -4   6  163.24    3.49
 -22  -8   7    2.15    1.25
  20  -3   9   61.32    2.24
   3 -15   5    8.85    1.65
 -23  -7   2   19.82    1.65
 -14 -12  10   46.40    2.03
 -11  -2  21  174.87    3.77
   3  -3  20    0.09    1.34
   0  -5  20  314.68    6.17
  11 -14   1    0.62    0.69
  -5 -13  12    3.05    1.50
 -15  -1  20    5.27    1.68
   5 -12  12   80.39    2.62
  15  -5  13    8.51    1.56
 -22  -2  15  900.37   13.49
  23  -2   5  788.76   12.21
 -23  -1  14  149.00    3.52
   7   0  19   -2.06    1.93
  22   0   7    1.31    1.87
   6  -3  19   14.02    1.71
 -21  -7  12  207.55    3.96
  12  -3  16   32.62    1.96
   7 -12  11  106.50    3.86
   6 -14   7  254.66    6.64
  20  -9   2    0.84    1.40
   7 -13   9    4.11    1.99
  11 -11  10  381.92    7.23
  10 -14   3   13.59    2.21
   7  -9  15   -0.28    1.22
  13  -4  15    8.63    1.74
  18 -11   0   44.93    1.71
  24  -2   3   10.69    1.74
 -12   0  21    2.21    1.96
  12  -9  12    5.23    1.06
   7 -15   1  128.94    3.24
  -4  -6  20   -0.19    1.59
  11  -1  17    0.62    1.59
 -13 -12  11    1.46    1.34
   2 -14   9  551.64   13.12
  10 -12   9  197.21    5.73
   4  -5  19    3.71    1.43
  -4 -15   6    0.59    1.31
   3 -13  11    2.65    1.99
 -25  -4   3    5.45    1.56
  -7  -6  20  213.44    4.42
 -17  -8  15   63.88    2.18
 -11  -5  20   31.38    1.71
 -22  -4  14  118.97    2.93
 -23  -7   7    0.72    1.40
 -10 -10  16  124.54    3.02
 -20 -10   4   56.96    1.99
 -19   0  18  262.61    7.07
  -9 -13  11    6.54    1.56
  -1 -13  12   23.53    1.59
 -16 -12   7   39.26    1.81
 -17  -6  17   71.23    2.21
  15 -11   6   62.72    2.40
  20  -6   7    5.64    1.59
   2  -4  20  137.38    3.18
  -7 -14   9   -0.41    1.37
 -20  -2  17   12.18    1.53
  -6 -15   5    0.37    1.34
 -22  -8   1   20.28    1.65
 -24  -5   9   48.51    1.96
  14 -10   9   42.56    1.46
 -14  -3  20   54.50    2.15
   1 -15   6   18.01    2.09
  -4 -12  14   23.24    1.71
  16 -12   1   69.27    1.99
 -18 -11   7   46.99    1.87
   9  -9  14   28.14    1.43
 -20 -10   3   46.52    1.84
  25   0   1   -0.03    2.03
 -12 -13   9   17.08    1.68
   7  -1  19   18.32    1.56
  -6  -4  21   63.25    2.40
  22  -1   7  272.24    5.08
 -24  -6   5    1.59    1.56
 -24  -6   4   23.12    1.78
 -22  -6  12   94.60    2.46
   1  -8  18   31.91    1.78
  19  -8   6    2.56    1.50
 -10  -3  21  625.36    9.32
  -3 -12  14  113.58    2.80
  -5  -4  21    5.33    1.71
 -10  -7  19   13.18    1.62
 -14 -13   6   23.77    1.56
  22  -7   2   13.34    1.84
 -17  -2  19   80.08    2.40
  -7 -15   4    1.15    1.28
   4 -11  14   36.11    1.65
 -23  -6  10   75.93    2.43
  24  -5   0   86.06    2.62
 -12  -1  21   70.33    2.18
 -19  -4  17    1.12    1.53
 -10 -14   7   50.60    1.81
 -20 -10   5   24.12    1.62
  15 -10   8   -0.69    0.97
   0  -2  21   83.19    2.52
  -5 -12  14    1.34    1.34
 -26   0   5   -3.80    2.03
 -21  -9   1   58.61    2.06
  13  -6  14    7.04    1.65
 -15 -12   9    0.75    1.46
  -6 -13  12   23.34    1.65
 -21  -9   7   48.70    1.99
  13 -13   3    3.93    2.09
  -7  -4  21  118.78    2.84
 -19  -1  18   17.79    1.90
 -25  -4   7  143.55    3.37
 -13  -4  20   23.34    2.06
   4  -2  20   41.25    2.03
   7  -8  16    2.87    1.46
  14  -2  15   22.28    1.90
 -20  -8  12   89.49    2.37
   7 -10  14   56.43    1.84
  13 -10  10    1.25    0.72
  -3  -6  20   26.92    1.74
   9  -8  15   15.42    1.50
   9  -5  17   11.25    1.62
 -25  -3   9   80.48    2.77
  -9 -14   8    3.08    1.46
 -26   0   4  110.93    4.02
  15  -3  14  149.63    3.37
  25  -1   1   12.43    1.68
  12  -7  14   18.98    1.46
   9  -2  18    3.52    1.81
   6 -15   3  861.46   17.17
   5 -15   4  656.52   13.96
  -4  -4  21   -0.34    1.59
 -24  -6   6  296.67    5.05
 -13 -13   8   14.27    1.65
 -25  -2  10   50.51    2.15
 -26   0   6   21.47    2.27
  -8  -6  20  560.21    8.85
  -2 -12  14   44.25    1.68
  20  -5   8   36.36    1.96
 -11 -13  10   55.09    1.96
   1   0  21   -1.03    2.40
  23  -4   4  134.17    3.33
 -24  -6   3  110.86    2.74
 -11  -8  18   -0.90    1.59
 -11  -9  17   25.24    1.84
  14 -12   5   37.73    2.68
  17 -11   3  138.50    3.05
   0  -7  19   68.67    2.24
 -20 -10   2   59.05    2.18
  20  -7   6    2.06    1.46
  14 -13   1    6.73    1.12
 -19 -10   9   59.55    2.06
  -9 -11  15    4.39    1.53
  -1  -3  21  151.18    3.49
 -26  -1   5   14.61    1.62
 -17 -10  12   12.93    1.56
  23  -5   3   47.77    2.15
  22  -5   5   32.84    2.03
  18  -9   6    2.71    1.31
  -5 -15   6   68.24    2.06
   8  -6  17   10.66    1.56
  -3 -14  10   14.68    1.28
 -16 -10  13   24.99    1.78
  -6 -12  14    8.10    1.50
   0 -13  12  136.54    2.65
 -13 -10  15  104.54    2.80
   5  -9  16    8.10    1.25
 -20  -9  10   14.08    1.62
 -15  -2  20    0.59    1.37
 -13  -6  19   11.31    1.40
  -2 -14  10   16.45    1.22
   1 -11  15    5.23    1.22
 -26  -1   4    1.03    1.65
 -10 -12  13   17.54    1.71
  -8 -15   2   13.96    1.50
 -25  -4   2   47.95    2.15
 -23  -7   1    1.62    1.43
  -8 -15   1  515.71    9.25
 -23  -2  14  223.07    4.08
  -8  -4  21  201.54    4.08
  18 -10   4   48.92    1.84
 -12 -14   2  207.86    4.08
 -11 -14   6   34.37    1.78
 -26  -1   6  124.29    3.05
   7  -5  18   14.27    1.62
   3 -12  13   25.61    1.90
   4  -7  18    0.56    1.46
   9 -10  13   19.32    1.03
 -12 -12  12  182.78    3.83
   1  -1  21   41.44    1.90
  18  -4  11   75.12    2.40
 -20 -10   6    1.81    1.56
   2 -15   6  191.66    5.30
   2  -9  17  102.67    2.84
  11  -2  17   77.99    2.52
 -12 -14   3    0.87    1.22
  -4 -14  10   27.79    1.53
 -22  -8   8    1.28    1.40
  10  -6  16   28.04    1.81
  16 -10   7   57.27    1.78
   7 -15   2  499.17   11.37
 -14  -8  17   10.94    1.56
 -26   0   3    0.84    1.87
   9 -12  10 1358.10   25.96
   4 -15   5   49.67    3.02
  10 -13   7   35.93    2.74
  10 -11  11   -0.59    2.06
  19 -10   2    2.68    1.40
  21  -3   8   47.83    2.15
  11 -13   6   22.19    2.27
   5 -14   8    2.12    2.15
  18   0  12    2.62    2.18
   8  -4  18   -1.28    1.46
  17  -4  12  250.96    4.64
  10  -4  17   11.53    1.59
   5 -10  15  164.77    3.49
   2 -10  16  154.18    3.27
  -3  -4  21    0.90    1.68
  19   0  11   -3.02    2.46
  -1 -14  10   27.33    1.18
  11 -14   2   17.73    2.12
 -12 -11  14  359.86    6.04
 -26   0   7   -1.31    2.40
  11  -5  16   62.29    2.12
  14  -5  14  175.49    3.93
 -24  -4  11    4.52    1.53
 -15 -11  12  104.01    2.68
  -1 -12  14   11.15    1.34
 -12 -14   1  129.09    3.15
 -16 -11  11   49.51    1.90
   7  -2  19    2.71    1.81
  22  -2   7  603.24    9.41
  13   0  16   16.02    2.34
  -8 -15   3    3.18    1.22
  -2  -6  20   69.36    2.34
  22  -6   4    5.48    1.62
 -23  -7   8   34.06    1.87
 -17 -12   3    0.78    1.43
   8 -15   0  205.93    4.42
  -7 -13  12   26.05    1.68
  12 -10  11   27.67    1.06
   3 -14   9   49.26    3.15
  25  -3   0   62.51    2.18
 -21  -3  16    6.17    1.65
 -24  -6   7   19.04    1.68
  19  -4  10  172.31    4.08
  22  -4   6  390.52    6.79
 -24   0  13    0.25    2.18
 -12  -2  21    7.98    1.46
 -17 -12   4    3.05    1.43
   1  -5  20  391.92    7.26
 -25   0  11   -0.75    2.34
  -9  -6  20  398.53    6.70
 -24  -6   2   29.23    1.90
 -26  -1   3    1.15    1.59
 -16  -4  19  174.96    3.52
 -18  -9  13   73.32    2.37
 -16  -7  17  384.01    5.92
  16 -11   5   61.70    1.71
  24  -4   2  225.37    4.77
 -24  -3  12    0.81    1.46
  18 -11   1    1.18    1.31
 -18 -10  11  670.79    9.35
 -19  -2  18    4.14    1.99
 -16  -8  16   86.31    2.43
  18  -1  12  126.66    3.21
  -8 -14   9    1.18    1.40
 -12 -14   4  138.78    2.93
 -25  -4   8  144.27    3.30
  -5 -14  10    4.36    1.25
   3  -6  19  558.18    8.41
  -7 -15   5   15.36    1.50
  19  -1  11   16.83    1.81
   9 -14   5   50.26    2.87
  -5  -9  18   29.29    1.81
 -11  -3  21  318.88    5.58
 -26  -1   7   -0.78    1.56
  -7 -12  14    2.93    1.40
 -17 -12   2   88.46    2.43
 -14  -7  18  309.66    5.27
  22  -8   0   31.41    1.62
 -20 -10   1    7.23    1.46
 -23  -4  13   85.75    2.34
   6 -13  10    6.89    1.90
   9 -13   8   83.41    3.89
 -23  -5  12   83.04    2.43
   8 -14   6   62.04    3.24
  25  -2   1    2.52    1.50
 -22  -3  15    5.80    1.62
  23  -3   5  219.27    4.49
  17   0  13   -0.09    2.24
  11  -9  13    0.59    1.09
  13  -1  16    6.14    1.65
  -2 -15   7   27.98    1.34
   5  -8  17  545.50    9.07
 -17  -9  14    3.99    1.50
  -4  -9  18    6.98    1.43
  24   0   4   44.62    3.15
  -9  -4  21  107.69    2.65
  11  -8  14   17.85    1.62
  12 -13   5   32.75    2.77
 -12  -5  20   28.64    1.74
 -14  -9  16   11.40    1.62
 -15 -10  14   22.09    1.68
  -6  -9  18   18.10    1.65
  24  -3   3  147.04    3.43
  21  -9   0    5.39    1.53
 -24  -1  13   57.18    2.24
 -11  -7  19    2.56    1.46
  17  -7  10    9.78    1.46
  -1 -15   7   25.05    1.28
   5   0  20  110.55    4.27
  20   0  10   45.77    2.71
 -11 -10  16   44.25    1.81
   6  -6  18  190.13    4.27
 -17  -5  18   70.08    2.15
 -18 -11   8    0.25    1.31
 -25  -1  11   64.87    2.27
   4 -13  11    1.87    2.09
  16  -7  11  101.58    2.77
 -26  -2   5   17.92    1.74
 -14 -13   7   76.71    2.21
 -21  -9   8    5.58    1.37
  -3 -15   7    2.27    1.15
   0 -14  10   27.33    1.65
 -15  -5  19  413.36    6.54
  16  -8  10   19.32    1.78
 -13   0  21   -0.03    1.78
  -5 -10  17   39.73    1.93
 -16 -12   8   42.84    1.78
  16  -4  13  539.33    8.32
  -6 -15   6  106.00    2.56
  -4 -10  17    6.01    1.59
 -10 -13  11   81.89    2.40
 -15 -13   3  224.69    4.18
   1 -13  12   75.22    2.74
   9  -7  16   -0.12    1.43
 -17 -12   5   11.56    1.50
 -20  -3  17   39.01    1.90
 -20  -6  15   13.62    1.59
  12 -14   0   25.96    1.50
  16 -12   2    9.97    1.15
 -26  -2   4   39.95    1.96
  23  -6   2    9.78    1.65
  17  -1  13   96.16    2.77
 -22  -7  11   45.12    1.93
   2  -8  18  116.91    2.87
 -15 -13   2   30.07    1.62
 -14 -11  13    7.60    1.50
 -26  -2   6   17.17    1.65
  10 -14   4   84.63    3.55
 -18  -4  18   80.02    2.46
  24  -1   4   13.71    1.59
  -3  -9  18   -0.47    1.50
 -26   0   2   -0.41    2.09
   1  -2  21   17.54    1.50
  -8 -15   4    3.24    1.31
  -2  -4  21   26.24    1.87
  15  -8  11   47.33    2.15
 -19  -9  12   40.79    1.93
 -17  -3  19   97.09    2.90
  -6 -10  17   11.84    1.62
 -20 -10   7    0.41    1.50
   8 -15   1  355.40    6.26
 -24  -5  10   13.24    1.68
  17  -8   9   61.41    2.31
   5  -1  20   32.78    1.78
  20  -1  10   15.83    1.68
 -17 -11  10    6.39    1.46
 -15 -13   4   -0.12    1.40
   7  -7  17   58.30    2.12
  21  -8   3    3.08    1.59
   0 -15   7   10.50    0.93
   7 -11  13    2.40    1.74
   0 -12  14    3.96    1.22
  15 -12   4 1122.07   21.25
  21  -6   6   10.25    1.56
   0  -3  21  404.35    7.20
   3 -15   6  524.47   12.00
  -3 -10  17    2.68    1.53
 -25  -4   1    0.75    1.43
   7 -14   7   19.35    2.27
  -7  -9  18   61.79    2.15
 -13  -1  21    0.75    1.46
 -10 -11  15   24.77    1.68
 -16   0  20   13.96    2.40
 -26   0   8    3.43    2.09
   6 -12  12   66.90    2.37
  18  -7   9    4.92    1.37
   1  -7  19   33.28    1.96
   4  -3  20    3.71    1.56
  20  -4   9   48.55    2.12
  -4 -15   7   32.56    1.59
 -17 -12   1    7.51    1.40
  14  -3  15  597.20    9.22
 -21  -8  11  245.25    4.49
 -18   0  19   -0.78    2.77
   3  -4  20  120.52    3.02
  23   0   6   45.46    3.18
  24  -5   1  112.39    3.08
  -6 -14  10   14.89    1.56
  17 -10   6   43.12    1.62
 -21  -6  14  125.17    2.90
  14 -13   2   20.69    2.68
 -19  -7  15    3.02    1.59
   9  -3  18   -0.75    1.68
  21  -5   7  111.52    2.84
  20  -9   3    1.31    1.40
   6  -4  19    9.66    1.68
  15  -7  12    0.97    1.53
  12  -4  16   -0.22    1.68
  -1  -6  20  138.44    3.46
 -20  -7  14   65.43    2.34
 -19  -6  16   50.23    2.06
 -25  -3  10   52.25    2.31
   6 -15   4  669.73   14.21
 -12 -14   5  436.10    6.82
  -5  -8  19   69.11    2.31
  20  -8   5    2.37    1.46
 -26  -1   2   29.35    1.87
  23  -7   0    7.26    1.62
   2 -11  15   10.56    1.34
 -12  -8  18   23.87    1.65
  -8 -13  12  523.75    8.19
  -6  -8  19  283.52    5.08
 -19 -11   4  139.31    3.27
  -6   0  22   18.57    2.65
  12  -6  15   10.97    1.87
 -16  -6  18  141.62    3.08
  17  -6  11    3.68    1.56
 -24  -6   8   19.01    1.71
 -26  -2   3    2.84    1.74
 -10 -14   8    2.31    1.40
 -15 -13   1   18.04    1.40
 -21  -5  15   13.74    1.62
 -19 -11   3   19.07    1.62
 -12  -9  17    2.52    1.74
 -10  -6  20  127.88    3.08
   7 -15   3  929.26   18.82
  -4  -8  19   14.58    1.74
 -16  -1  20    3.96    1.59
 -26  -1   8  931.97   14.02
   5 -11  14  300.69    6.89
  18  -2  12  140.37    3.37
  -8 -12  14    2.96    1.46
  -7 -10  17   18.04    1.62
   8 -13   9    1.99    1.90
   2   0  21   -0.62    2.15
 -18  -1  19    0.62    1.65
 -20  -5  16   32.50    1.78
  19  -2  11  129.56    3.30
  -5   0  22  108.34    4.52
  16   0  14    0.03    1.96
   5  -5  19    5.17    1.59
  25   0   2  218.02    5.92
 -26  -2   7  195.87    4.18
 -24  -6   1    5.70    1.99
  23  -1   6  116.32    3.49
 -25  -5   5  303.15    6.04
  -7   0  22   34.34    2.77
 -15  -3  20   52.04    2.06
 -14  -4  20   20.88    2.06
  18  -6  10    2.59    1.40
 -16  -9  15   17.48    1.59
  11 -10  12   71.92    1.84
 -11 -14   7   95.00    2.43
 -23  -3  14    5.67    1.65
  -2  -9  18    1.71    1.56
   1 -14  10   -0.65    2.37
  13  -2  16  103.76    2.74
   5 -15   5  262.24    6.76
 -23  -6  11   12.34    1.59
  19  -9   5   47.14    1.90
 -25  -5   4   17.17    1.99
  -2 -10  17   17.14    1.65
 -10  -4  21   92.73    2.52
   8 -12  11   44.09    2.93
 -22  -8   9   -1.37    1.46
  13 -13   4    2.09    2.15
 -15 -13   5   10.47    1.62
   1 -15   7  127.53    4.24
 -17 -12   6   13.96    1.62
 -24  -2  13   94.16    2.52
 -11 -12  13   11.75    1.68
  11  -3  17   66.37    2.31
  14  -8  12   54.47    2.65
  21   0   9   -0.22    2.84
 -19 -11   5   31.81    1.74
 -25  -2  11    2.99    1.71
  -6  -1  22    0.69    1.71
 -22   0  16  196.65    6.29
 -14 -12  11    1.62    1.50
  11  -7  15    2.77    1.40
  -7  -8  19  485.30    7.63
  16  -6  12   18.54    1.71
  20 -10   0    4.30    1.40
  15  -9  10    0.87    1.34
   9 -11  12   69.86    2.56
  18  -8   8   17.14    1.84
  -8  -9  18  185.33    3.65
   4 -12  13   63.10    2.59
  22  -7   3    7.67    1.74
 -23  -7   9   13.27    1.65
 -25  -5   6    7.63    1.84
  16  -9   9    1.93    1.37
 -13 -13   9    5.36    1.68
   4 -14   9   17.39    2.52
  -5 -15   7  183.59    3.58
   2  -1  21    4.92    1.78
 -19 -11   2    0.72    1.43
   3  -9  17  198.98    4.55
  -5  -1  22   65.53    2.49
  16  -1  14   19.69    1.99
  25  -1   2    1.56    1.46
 -25  -4   9  157.54    3.89
  -7  -1  22    1.46    1.78
  11 -14   3   73.16    3.27
 -15 -12  10    1.59    1.46
  -3  -8  19    2.37    1.59
 -19 -10  10  140.65    3.18
  -4   0  22   48.20    2.77
  15  -4  14  172.50    3.89
 -12 -13  10    2.99    1.34
  12 -14   1    8.07    0.78
   3 -10  16  894.73   13.12
  21  -7   5    8.63    1.59
   7  -3  19    4.80    1.74
  17  -2  13 1162.08   15.74
  22  -3   7  566.47    9.07
 -21   0  17   -0.93    2.40
  -8   0  22   24.02    2.99
  10   0  18   45.27    3.27
  -9 -15   2   31.75    1.74
   8  -9  15   10.31    1.37
  24  -2   4    0.53    1.56
 -18  -7  16   17.92    1.87
  12 -12   8   34.09    2.80
  13  -5  15    3.12    1.74
  -9 -15   1  530.48    9.50
  -4 -11  16   62.16    2.12
 -12  -3  21   72.01    2.34
   2 -13  12   13.40    1.74
 -14  -6  19   20.69    1.71
  -9 -14   9   17.89    1.62
   5  -2  20    2.99    1.74
  20  -2  10  324.15    6.08
  -7 -15   6   88.74    2.27
  21  -1   9  158.10    4.18
  -5 -11  16   58.11    2.09
 -21  -7  13  214.19    4.21
  -1  -4  21   96.90    2.80
 -22  -1  16  407.84    6.70
 -25  -5   3    3.68    1.74
  19  -7   8    5.55    1.46
  -8 -15   5    0.72    1.28
  13 -12   7  102.61    4.55
 -13  -2  21   22.06    1.74
  14 -11   8   69.98    2.46
 -22  -5  14  113.08    2.71
   6 -14   8    7.20    2.27
  13 -11   9   37.73    1.93
   8 -15   2  375.84    9.75
 -19  -3  18    2.59    1.37
   1 -12  14    0.93    1.03
   2  -5  20  270.46    5.30
   8   0  19   -2.27    2.40
  17 -12   0  123.83    2.96
  14  -9  11   15.36    1.74
  17 -11   4  154.64    3.18
  -7 -14  10  130.71    3.15
  19  -6   9   63.78    2.21
  -4  -1  22    8.38    1.62
  -3 -11  16    5.39    1.43
  -8 -10  17    2.74    1.62
 -26   0   1    1.87    2.62
  -9 -15   3   17.42    1.37
  25  -3   1  150.47    3.61
  18 -11   2 1184.30   16.23
 -19  -8  14   94.51    2.77
  -6  -5  21   85.94    2.59
  22  -8   1   11.72    1.74
 -21  -1  17   41.25    2.31
  14  -7  13   24.37    1.78
  -8  -1  22   35.09    2.15
  10  -1  18   19.63    1.87
 -14 -10  15  116.63    2.90
  15 -13   0   13.18    1.43
  -5  -5  21  127.29    2.93
 -23   0  15   -0.41    1.90
 -26  -2   2   -0.56    1.71
 -12  -7  19    0.65    1.53
  21  -9   1    8.51    1.46
 -20  -9  11   68.64    2.09
  -8  -8  19  723.55   10.22
 -22  -6  13   37.36    1.87
 -13 -12  12    3.96    1.50
 -19  -5  17    2.03    1.65
  -6 -11  16   72.63    2.40
  11 -12   9   40.94    2.65
  19 -10   3   91.11    2.46
 -20 -10   8   97.56    2.56
   5  -7  18   39.51    1.84
   6  -9  16    7.35    1.34
  17  -9   8   17.92    1.46
   0 -16   0  528.05   10.63
   4 -15   6  492.56   11.72
 -26  -3   5   25.02    1.71
   8 -10  14   18.23    1.12
 -21  -9   9    1.31    1.46
  -1 -10  17   -0.56    1.40
 -19 -11   6    4.46    1.46
 -13 -11  14  140.15    3.37
  -1  -9  18    0.41    1.50
 -18  -6  17   23.84    1.78
 -26   0   9   -0.31    2.62
   9 -15   0  291.24    5.89
  -7  -5  21   85.75    2.46
  21  -4   8  178.57    3.93
 -25  -5   7  496.80    8.13
 -16  -2  20   10.34    1.59
 -26  -2   8   56.93    2.18
 -13  -5  20    2.80    1.43
 -12 -14   6   87.28    2.49
   8  -1  19    3.49    1.71
 -18  -2  19    2.74    1.65
   1 -16   0  328.11    5.30
 -14 -13   8    0.84    1.56
  -3   0  22  162.40    5.27
  23  -2   6   34.62    1.90
   0  -6  20  116.25    2.99
 -18  -8  15   64.13    2.24
   8  -8  16   14.96    1.59
 -12 -10  16   39.63    1.96
   2 -15   7  128.28    4.33
 -26  -3   4   -2.34    1.65
  15  -6  13   24.80    1.81
 -26  -1   1   34.65    2.06
  -2  -8  19    1.78    1.53
   0 -16   1  352.07    5.52
  -9   0  22  183.99    6.54
  15 -11   7   19.79    1.74
 -18 -11   9    8.91    1.68
  12 -11  10  167.70    3.99
 -19 -11   1   52.38    1.99
   6 -10  15   59.73    2.09
  -4  -5  21   61.48    2.21
 -26  -3   6    6.64    1.68
 -15  -8  17    1.25    1.53
 -15 -13   6   86.68    2.27
  -1 -16   1  410.12    6.42
 -23  -1  15   28.23    1.71
  25  -4   0    7.79    1.65
  10  -9  14   29.82    1.50
   1  -3  21  477.45    7.67
   5 -13  11    3.08    2.15
  23  -5   4   24.37    1.78
 -21  -4  16  168.01    3.43
   2 -14  10   -1.18    2.12
  14 -12   6  354.93    8.41
  -9 -12  14   25.33    1.87
  -9  -9  18  177.14    3.65
  -2 -11  16   15.36    1.59
 -20  -8  13  306.92    5.33
   4  -6  19  264.63    4.80
  -9 -13  12  967.06   14.30
  -6  -2  22    0.53    1.53
 -11 -13  11  283.61    4.99
  -6 -15   7   81.82    2.34
 -11  -6  20    7.79    1.62
 -24  -4  12    1.56    1.56
   1 -16   1  128.10    2.59
 -14   0  21    2.09    1.96
 -11 -11  15    6.70    1.53
 -26  -1   9  121.96    3.18
 -16 -12   9    9.75    1.68
   3  -8  18  361.23    6.73
  12   0  17    1.43    2.18
   2  -2  21    2.87    1.53
  18 -10   5   21.28    1.53
  -5  -2  22    7.79    1.59
  16  -2  14  122.92    3.05
 -23  -8   4  272.21    4.67
  25  -2   2   33.99    2.12
  -3  -1  22    2.40    1.78
 -11  -4  21  107.06    2.93
   2  -7  19    2.15    1.50
 -24  -6   9   -0.34    1.43
  -4 -13  13    3.24    1.34
  -7  -2  22   40.38    1.96
  -3 -13  13    4.42    1.25
 -20   0  18  125.35    4.08
 -25   0  12  152.24    4.55
 -17 -12   7   25.08    1.78
  -9 -15   4   96.69    2.37
  13  -8  13    5.30    1.31
 -25  -5   2   11.75    1.65
 -22  -4  15  284.02    4.77
   2 -16   0  163.90    3.18
 -23  -8   5  202.44    3.96
  23  -4   5  562.73    8.97
  -7 -11  16    1.06    1.50
  -9  -1  22  320.60    5.89
  16 -12   3   33.87    1.34
   7 -13  10   33.40    2.49
  -8  -5  21   38.48    2.06
  15   0  15    1.53    2.59
  -2 -16   1  374.50    5.86
  18  -5  11  101.05    3.02
  10  -8  15   36.39    1.78
  19  -8   7    9.94    1.59
   3 -11  15   63.50    1.96
 -15  -7  18  259.59    4.58
  24  -4   3   39.01    2.09
 -13 -14   2  139.47    2.77
  24  -6   0    3.21    1.68
 -22  -9   4   13.71    1.62
 -13 -14   3    1.40    1.31
  21  -2   9   -0.12    1.50
  13  -9  12    5.48    1.25
 -22  -2  16    1.62    1.71
 -26  -3   3   11.87    1.68
  23  -7   1    7.32    1.87
 -14  -1  21   29.88    1.96
  -1 -16   2   19.94    1.40
  -5  -7  20   46.61    2.12
  -5 -13  13    1.84    1.28
   0 -16   2   26.80    1.43
  14 -13   3   44.15    3.15
  -6  -7  20   53.97    2.12
  -2 -13  13    3.12    1.28
  18  -3  12   81.33    2.59
 -22  -9   5   16.92    1.56
   8  -5  18   35.83    1.90
  17  -5  12    7.79    1.65
  10  -5  17   95.88    2.65
   9 -14   6   54.40    3.08
  12  -1  17    0.44    1.84
 -17 -10  13    3.52    1.43
 -23  -8   3   93.85    2.56
  -3  -5  21    6.33    1.71
 -20  -4  17   29.98    1.84
  19  -3  11  162.56    3.86
   9  -6  17   21.28    1.84
 -26  -3   7   61.79    2.27
   6  -8  17  485.71    8.41
  -9  -8  19  477.42    7.51
 -24  -5  11   18.29    1.90
  22   0   8  170.72    5.39
  -2 -15   8    0.97    1.18
 -20  -1  18   25.58    1.87
 -25  -1  12   11.06    1.59
  10 -12  10 1502.21   28.95
  -4  -2  22   71.88    2.40
   2 -16   1    9.57    1.09
  -9 -10  17   -0.75    1.50
   7 -15   4  388.74    9.47
  13  -3  16   34.34    2.03
 -21  -2  17    5.36    1.53
 -22  -9   3   90.74    2.49
  -8  -2  22   89.80    2.62
   9 -15   1  195.21    3.80
  15  -1  15  339.70    5.95
  10  -2  18   18.13    1.81
 -15  -9  16   22.19    1.81
  12 -14   2    2.77    2.12
  11 -13   7  122.24    4.24
  -3 -15   8    3.68    1.28
  10 -14   5    1.62    2.46
  20  -6   8   13.49    1.65
  10 -10  13   13.12    1.03
 -13  -8  18  114.76    3.08
 -23  -8   6    4.55    1.46
  20 -10   1   49.26    1.87
  19  -5  10    2.03    1.93
 -17  -4  19   30.66    1.71
  22  -5   6   -0.41    1.50
 -24  -3  13   43.40    2.21
 -16 -11  12   35.86    1.78
  -4  -7  20   50.17    2.21
   6 -15   5  314.93    7.48
  -2 -16   2    1.00    1.37
 -13 -14   1   67.09    2.24
  -1 -15   8    4.27    0.93
   1 -16   2    0.97    1.25
   0  -4  21  169.47    3.68
 -25  -3  11   65.00    2.62
  -8 -14  10  174.30    3.49
 -13 -14   4  195.12    3.99
 -18 -10  12    8.04    1.43
  -2   0  22  880.34   19.01
  -7  -7  20  371.64    6.64
 -16  -5  19  617.85    8.88
  24  -5   2    1.12    1.56
  18  -9   7    3.30    1.40
  -1 -11  16   10.13    1.46
  23  -6   3   33.81    1.93
  22  -6   5   19.85    1.84
 -13  -9  17  110.99    2.77
 -17  -7  17  125.10    2.90
  -3 -14  11    1.84    1.25
   0 -10  17   16.45    1.59
 -25  -5   8  177.48    3.89
   4  -4  20   74.22    2.43
 -19 -11   7    3.52    1.31
 -10   0  22  367.15    8.79
  20  -7   7  156.86    3.52
   8  -2  19   80.95    2.56
  14  -4  15    3.27    1.74
   3 -13  12   49.14    2.15
  12 -13   6    0.72    2.15
   6   0  20  117.03    4.39
   8 -14   7   23.15    2.49
  -1  -8  19   16.95    1.74
  15 -13   1    1.53    1.28
  -3 -16   1  177.26    3.37
   2 -12  14   29.82    1.25
  17 -12   1   23.87    1.40
  22  -1   8   38.61    2.03
   3 -16   0   20.94    1.25
  -8 -15   6   36.30    1.78
 -23  -5  13   25.43    1.84
  10 -13   8  492.78   10.87
  15 -10   9    2.09    1.06
  16 -11   6   35.43    1.34
 -11 -14   8   11.22    1.56
 -26  -2   1  173.93    3.77
   0  -9  18    1.15    1.53
  11 -11  11   21.38    1.96
   9  -4  18    8.60    1.62
  17  -3  13  159.29    3.52
 -24  -7   5  206.87    4.11
 -17  -8  16    8.51    1.56
 -22  -8  10    0.53    1.46
   8 -15   3  534.75   11.53
  -2 -14  11   10.06    1.15
   3   0  21   -1.84    2.09
 -24  -7   4  612.09    9.07
  -4 -14  11   43.59    1.87
   5 -14   9   76.62    3.24
 -25  -4  10   39.20    2.03
 -22  -7  12   74.56    2.31
  -6 -13  13    5.11    1.65
 -22  -9   6   25.71    1.74
   7  -6  18   50.38    2.09
  24  -3   4    5.05    1.56
 -23  -2  15  596.67    9.13
 -24   0  14    1.09    2.31
  -4 -15   8    1.81    1.31
   7 -12  12  298.50    5.95
  -9  -5  21   36.83    2.15
  -1 -13  13    4.46    1.15
  14 -10  10   13.65    1.06
   3 -15   7  463.71   11.09
 -16 -10  14   50.38    1.96
 -23  -7  10   40.26    1.96
   5  -3  20   18.73    1.78
  20  -3  10   97.65    3.15
 -17 -11  11   35.30    1.90
  -8 -11  16   23.93    1.71
 -12 -12  13    1.99    1.50
  19 -11   0   14.61    1.46
  -2  -1  22  190.35    4.14
 -15 -11  13   18.20    1.62
  13  -7  14    7.45    1.68
  15 -12   5  103.01    4.55
 -13  -3  21    8.88    1.56
  16  -5  13    1.65    1.68
 -26  -2   9  272.64    4.86
  21  -8   4   94.85    2.59
   0 -15   8   84.97    3.40
 -10  -1  22  410.37    6.61
   5 -12  13    2.40    1.81
   6  -1  20   18.70    1.78
  -3  -7  20    0.00    1.62
 -10 -14   9    2.27    1.56
 -23  -8   2   92.17    2.52
  26   0   0    7.38    2.62
  -3  -2  22    0.93    1.46
   6 -11  14   96.00    3.30
  -3 -16   2    8.79    1.34
  11  -6  16    6.51    1.53
  14  -6  14   11.06    1.71
 -22  -9   2    9.04    1.53
 -15  -4  20   66.90    2.68
 -10  -9  18   40.54    1.99
   8 -11  13    1.28    1.59
 -23  -4  14  126.01    2.84
   2 -16   2    8.66    1.65
  -9  -2  22   70.67    2.12
  -9 -15   5    0.69    1.37
   4 -10  16  494.50    8.19
  20  -9   4    6.39    1.53
  16 -10   8    1.90    1.18
  11 -14   4   51.29    2.74
   4  -9  17  456.45    7.48
 -21  -8  12   75.44    2.56
   3  -1  21    0.87    1.65
   3 -16   1    2.56    1.43
  -7 -15   7  157.95    3.24
 -24  -7   6  195.84    3.83
  -8  -7  20  236.12    4.77
  24   0   5    1.56    2.27
 -18  -5  18   99.15    2.68
  -1 -16   3   77.09    2.09
   5 -15   6  521.76   11.62
 -24  -1  14   44.99    2.31
 -26  -3   2    0.93    1.65
 -15 -13   7   95.66    2.59
  -1 -14  11   33.09    1.68
 -17   0  20   71.92    3.74
  -2  -5  21   12.87    1.87
 -24  -7   3  117.44    2.93
  -5 -14  11    3.77    1.34
   3 -14  10    7.85    1.93
  11  -4  17   21.53    2.06
 -12 -14   7    7.32    1.56
   0 -16   3   30.94    1.50
   1  -6  20   75.00    2.34
 -25  -5   1    6.48    1.59
  13 -14   0   21.25    1.50
 -20 -10   9   38.70    1.99
 -14  -2  21   23.68    1.87
 -21 -10   4   53.72    1.96
 -23  -8   7    0.34    1.40
 -18  -9  14    9.04    1.81
 -26   0  10  304.61    7.76
 -16  -3  20   12.03    1.81
 -26  -3   8   -0.22    1.56
  -2 -16   3   75.81    2.09
  20  -5   9   -0.12    1.65
   8  -7  17   22.40    1.65
 -10 -12  14  188.64    3.83
 -13 -14   5  664.78    9.69
  12  -2  17    1.15    1.68
 -18  -3  19  141.34    3.15
  25   0   3   -1.06    2.06
  26  -1   0   15.89    1.93
   3  -5  20   67.30    2.15
  23  -3   6   50.73    2.21
  13 -13   5   36.08    2.56
 -13  -7  19    1.90    1.46
 -20  -2  18    1.18    1.59
 -25  -2  12  103.76    3.12
 -23  -6  12    1.90    1.56
  -5 -15   8   21.00    1.62
 -10 -15   2  171.16    4.14
   7  -4  19   19.01    1.81
  22  -4   7  274.08    5.23
   6  -5  19   29.29    1.87
  12  -5  16   54.68    2.18
 -19  -9  13  194.21    3.83
  -4 -12  15    4.30    1.56
  13 -10  11    4.52    0.93
  15  -2  15   51.82    2.31
 -21 -10   3  218.77    4.49
  24  -1   5    4.64    1.78
 -21 -10   5   14.61    1.59
   9 -13   9   38.33    3.12
 -17  -1  20   34.80    1.99
 -10  -8  19   18.07    1.68
 -12  -6  20    2.43    1.50
 -10 -13  12 1262.85   17.29
  22  -8   2   19.07    1.81
   7 -14   8    2.52    2.46
  21  -9   2    0.47    1.50
  -4 -16   1   81.20    1.96
 -12  -4  21   66.43    2.37
  -5 -12  15   21.47    1.68
   1 -16   3    3.77    1.25
 -10 -15   1   22.34    1.65
 -17  -6  18   -0.65    1.62
  10  -7  16    6.45    1.53
  -7 -13  13   56.12    2.09
  -6  -3  22    0.81    1.68
  18 -11   3   44.65    1.81
  -3 -12  15    5.30    1.40
 -13 -13  10    1.06    1.62
   0 -11  16   -0.44    1.43
 -19 -10  11  822.38   11.50
 -15  -6  19   14.58    1.84
   0 -13  13    4.64    0.97
 -21  -9  10   42.50    1.99
   4 -16   0    1.40    1.31
   9 -15   2  124.23    4.49
  12  -9  13   40.97    1.68
 -17 -12   8   94.85    2.52
 -19  -4  18   50.98    2.27
 -10 -15   3  226.84    3.93
 -26  -1  10  149.41    3.18
 -10 -10  17    2.34    1.62
 -22  -9   7  128.13    3.05
   1 -15   8  402.36    9.60
   2  -3  21  165.17    3.68
  25  -1   3    5.58    1.65
  -5  -3  22   66.84    2.46
  16  -3  14  157.51    3.52
  25  -3   2   13.34    1.62
  -7  -3  22   31.31    1.93
  22  -2   8  257.41    5.14
 -14  -5  20    5.89    1.59
 -18 -12   3    3.46    1.43
  -1   0  22 1385.21   26.98
  25  -4   1   42.91    2.06
  -3 -16   3  150.72    3.12
   9 -12  11   83.51    3.46
  12  -8  14   14.05    1.50
 -16 -13   3   39.07    1.74
 -18 -12   4   27.58    1.74
  -2  -7  20    0.44    1.68
  22  -7   4   35.86    1.90
 -19   0  19   -0.25    2.40
   0 -14  11   55.37    2.09
  -4 -16   2   72.26    2.12
 -10  -5  21   14.61    1.96
 -13 -10  16   71.82    2.43
  -6 -14  11   30.38    1.71
 -11   0  22  130.00    4.36
 -24  -7   7   14.93    1.62
 -14 -13   9    8.94    1.62
 -12 -11  15   16.83    1.68
 -24  -6  10   80.89    2.68
 -15 -12  11    5.70    1.87
   3 -16   2   22.53    1.43
   0  -8  19   12.03    1.56
  21  -3   9  124.32    3.12
  20  -8   6    0.53    1.78
 -22  -3  16    7.35    1.62
 -26  -4   5    6.73    1.62
  -9  -7  20  156.67    3.46
 -24  -7   2   29.32    1.87
  -6 -12  15   16.55    1.62
 -16 -13   4    1.43    1.43
  -2  -2  22   53.81    2.24
 -17  -9  15    1.46    1.59
[truncated: 753,322 more chars]
